# Supplementary material for: Murine blastocysts generated by in vitro fertilization show increased Warburg metabolism and altered lactate production
Source: eLife. 2022 Sep 15;11:e79153. doi: 10.7554/eLife.79153 (PMC9519152; doi:10.7554/eLife.79153)
Supplement: Figure 1—figure supplement 1—source data 1. [file elife-79153-fig1-figsupp1-data1.xlsx]

## Sheet: IVF
IVF No.	Mouse	IVF Observations					MO= morphology
		Egg Total	2 cells		Blastocyst		notes
			Number	Percent	Number	Percent
1	4 CF1	24	18	75	17	94.4444
		25	9	36	6	66.6667
2	5 CF1	18	13	72.2222	9	69.2308
		20	7	35	3	42.8571
3	2 CF1	25	18	72	17	94.4444
		33	19	57.5758	14	73.6842
4	2 CF1	24	17	70.8333	16	94.1176
		32	18	56.25	13	72.2222
5	4 CF1	12	8	66.6667	6	75
		11	5	45.4545	2	40
6	3 CF1	10	7	70	5	71.4286
		11	6	54.5455	3	50
7	5 CF1	7	5	71.4286	4	80
		8	4	50	2	50
8	5 CF1	14	9	64.2857	6	66.6667
		15	8	53.3333	4	50
9	10 CF1	48	35	72.9167	33	94.2857
		46	27	58.6957	18	66.6667
10	10 CF1	55	39	70.9091	34	87.1795
		56	34	60.7143	20	58.8235
11	10 CF1	43	32	74.4186	27	84.375
		42	26	61.9048	16	61.5385
