# Supplementary material for: Murine blastocysts generated by in vitro fertilization show increased Warburg metabolism and altered lactate production
Source: eLife. 2022 Sep 15;11:e79153. doi: 10.7554/eLife.79153 (PMC9519152; doi:10.7554/eLife.79153)
Supplement: Figure 1—figure supplement 1—source data 2. [file elife-79153-fig1-figsupp1-data2.xlsx]

## Sheet: Sheet1
		Cell count
		FB	5% BL	20% BL
	Total cell number	63	46	43
		59	45	36
		90	47	37
		65	43	42
		68	63	39
		53	68	66
		72	61	61
		75	72	60
		78	53	55
		83	64	40
			63	43
			72
