# Supplementary material for: Murine blastocysts generated by in vitro fertilization show increased Warburg metabolism and altered lactate production
Source: eLife. 2022 Sep 15;11:e79153. doi: 10.7554/eLife.79153 (PMC9519152; doi:10.7554/eLife.79153)
Supplement: Figure 1—source data 1. [file elife-79153-fig1-data1.xlsx]

## Sheet: ROS and GSH level
	Fluorescence intensity					Fluorescence intensity
	FB	5% BL	20% BL			FB	5% BL	20% BL
ROS	85.678	141.886	526.239		GSH	337.072	113.385	169.861
	26.525	289.771	422.026			1575.46	259.286	81.659
	51.4	131.488	606.895			1699.38	178.398	25.769
	59.102	288.697	310.631			796.438	95.961	259.383
	40.097	149.007	634.176			1000.53	116.097	36.133
	98.705	124.329	419			566.484	86.676	264.449
		182.204					102.73	62.244
		147.773					55.951	8.927
							78.735	12.937
60.2512					995.894
	1.42201	2.35491	8.73409			0.338462	0.113853	0.170561
	0.44024	4.80938	7.00444			1.58195	0.260355	0.0561817
	0.853095	2.18233	10.0728			1.70639	0.179134	0.0790596
	0.980927	4.79156	5.1556			0.799722	0.0963567	0.0819957
	0.665497	2.4731	10.5255			1.00466	0.116576	0.0258753
	1.63823	2.06351	6.95422			0.56882	0.0870334	0.260452
		3.02407					0.103154	0.036282
		2.45262					0.00896381	0.265539
							0.0129903	0.0625006
