# Supplementary material for: Murine blastocysts generated by in vitro fertilization show increased Warburg metabolism and altered lactate production
Source: eLife. 2022 Sep 15;11:e79153. doi: 10.7554/eLife.79153 (PMC9519152; doi:10.7554/eLife.79153)
Supplement: Figure 1—source data 2. [file elife-79153-fig1-data2.xlsx]

## Sheet: Extracellular ROS level
DCF(nM)	1	2	3
A	4401.7	4467.19	4366.82
B	416.346	417.766	410.779
C	41.997	41.392	39.877
D	5.934	6.29	6.583
E	2.599	2.645	2.755
F	3.131	2.981	2.687
G
H
DCF(nM)
10000	37085.9	36504.2	37305.8	36965.3
1000	4401.7	4467.19	4366.82	4411.9
100	416.346	417.766	410.779	414.964
10	41.997	41.392	39.877	41.0887
1	5.934	6.29	6.583	6.269
0	2.599	2.645	2.755	2.66633
RFU	1	2	3	4	5	6		DCF(nM)
A	DW			1914.37	1729.4	1759
B	Fresh KSOM			504.905	504.353	511.054		97.7019	97.5522	99.3693
C	5% KSOM (w/o BL)			521.5	539.22	533.361		102.202	107.007	105.418
D	20% KSOM (w/o BL)			520.49	529.274	529.596		101.928	104.31	104.397
E	5% KSOM (w/ BL)_IVF5%O2			488.858	492.243	470.625		93.3505	94.2684	88.4064
F	20% KSOM (w/ BL)_IVF20%O2			502.429	512.339	513.159		97.0305	99.7177	99.9401
