# Supplementary material for: Murine blastocysts generated by in vitro fertilization show increased Warburg metabolism and altered lactate production
Source: eLife. 2022 Sep 15;11:e79153. doi: 10.7554/eLife.79153 (PMC9519152; doi:10.7554/eLife.79153)
Supplement: Figure 2—source data 1. [file elife-79153-fig2-data1.xlsx]

## Sheet: 8-OHdG
		Fluorescence intensity				Relative fluorescence intensity
	8-OHdG	FB	5% BL	20% BL		FB	5% BL	20% BL
		178.332	646.095	1281.8		1	3.62299	7.18769
			282.647	773.787			1.58495	4.33902
		426.671	488.526	864.324		1.45211	1.66263	2.9416
		160.985	253.044	1258.87		0.547889	0.861198	4.28438
		293.828
		275.231	551.511	1142.05		0.982331	1.96841	4.07612
		285.132	661.655	1669.42		1.01767	2.36152	5.95837
		280.182
		113.85	294.881	1654.07		0.746646	1.93387	10.8476
		191.114		1688.69		1.25335		11.0747
		152.482		1189.42				7.80039

## Sheet: 8-epi PGF2 alpha
	8-epi PGF2-alpha	Fluorescence intensity				Relative fluorescence intensity
		FB	5% BL	20% BL		FB	5% BL	20% BL
		27.49	1135.82	1966.83		0.17713	7.31859	12.6731
		282.903	815.152	2139.47		1.82286	5.25237	13.7855
		155.197
		110.607	1204	2218.89		0.889324	9.68067	17.8407
		138.136	888.883	1693.6		1.11067	7.14697	13.6172
			1518.04	2282.36			12.2056	18.3511
		124.371
		407.58	625.748	1055.55		3.2771	5.03126	8.487
		406.966	476.42	1677.68		3.27217	3.8306	13.4892
		407.273
		480.571	574.186	1289.13		3.86398	4.61668	10.3651
		480.571
		367.667	468.37	1161.65		2.95619	3.76588	9.34016
		507.281				4.07874
		437.474

## Sheet: DNPH
		Fluorescence intensity				Relative fluorescence intensity
	Isoprostance	FB	5% BL	20% BL		FB	5% BL	20% BL
		878.992	1524.46	3014.42		1.11767	1.9384	3.83294
		693.907	1030.8			0.882329	1.3107
		786.449
		656.989	1260.2	1990.29		0.980121	1.88002	2.96919
		683.639	1126.69			1.01988	1.68085
		670.314
		884.311	1579.9	2413.88		1	1.78659	2.72968
		884.311				1
		615.916	803.38	1398.27		1.15175	1.50231	2.61474
		453.612	875.301	1332.65		0.848247	1.6368	2.49203
				1289.23				2.41084
		534.764
		588.593	801.676	1220.96		1.11167	1.51411	2.30602
		470.344	925.718	1275.06		0.888332	1.74839	2.40819
				1499.76				2.83257
		529.468
