# Supplementary material for: Murine blastocysts generated by in vitro fertilization show increased Warburg metabolism and altered lactate production
Source: eLife. 2022 Sep 15;11:e79153. doi: 10.7554/eLife.79153 (PMC9519152; doi:10.7554/eLife.79153)
Supplement: Figure 3—source data 1. [file elife-79153-fig3-data1.xlsx]

## Sheet: Mitochondria activity-1
Assay Name	20201215_055733 mito stress bl 2
Normalized	No
Baseline	No
Background Correction	True
Widget Title	Kinetic Graph
Data Type	OCR
Units	pmol/min
								Per blastocyst
Time (minutes)	FB		0.05		0.2			Time (minutes)	FB		0.05		0.2
	Mean	Std Dev	Mean	Std Dev	Mean	Std Dev			Mean	Std Dev	Mean	Std Dev	Mean	Std Dev
1.53	16.56	0	29.67	0	23.89	0		1.53	2.76	0	2.11929	0	1.59267	0
8.05	15.95	0	28.04	0	21.54	0		8.05	2.65833	0	2.00286	0	1.436	0
14.58	14.08	0	26.13	0	22.92	0		14.58	2.34667	0	1.86643	0	1.528	0
21.18	6.27	0	14.5	0	11.51	0		21.18	1.045	0	1.03571	0	0.767333	0
27.68	5.57	0	13.69	0	10.65	0		27.68	0.928333	0	0.977857	0	0.71	0
34.16	5.59	0	11.53	0	12.04	0		34.16	0.931667	0	0.823571	0	0.802667	0
40.76	25.71	0	48.35	0	45.43	0		40.76	4.285	0	3.45357	0	3.02867	0
47.29	23.41	0	43.24	0	44.91	0		47.29	3.90167	0	3.08857	0	2.994	0
53.81	21.83	0	39.78	0	35.94	0		53.81	3.63833	0	2.84143	0	2.396	0
60.41	3.56	0	2.47	0	2.01	0		60.41	0.593333	0	0.176429	0	0.134	0
66.94	2.25	0	2.94	0	2.67	0		66.94	0.375	0	0.21	0	0.178	0
73.46	1.05	0	2.7	0	3.1	0		73.46	0.175	0	0.192857	0	0.206667	0

## Sheet: Mitochondria activity-2
Assay Name	20201221_Mito stress bl
Normalized	No
Baseline	No
Background Correction	True
Widget Title	Kinetic Graph
Data Type	OCR
Units	pmol/min
								Per blastocyst
Time (minutes)	FB		0.05		0.2			Time (minutes)	FB	0.05	0.2
	Mean	Std Dev	Mean	Std Dev	Mean	Std Dev			Mean	Mean	Mean
1.53	17.21	0	35.47	0	27.51	0		1.53	2.86833	2.21687	1.965
8.04	14.03	0	34.85	0	26.69	0		8.04	2.33833	2.17813	1.90643
14.54	14.14	0	32.28	0	25.1	0		14.54	2.35667	2.0175	1.79286
21.13	5.52	0	14.13	0	11.53	0		21.13	0.92	0.883125	0.823571
27.64	6.81	0	14.52	0	10.57	0		27.64	1.135	0.9075	0.755
34.14	5.97	0	12.29	0	10.91	0		34.14	0.995	0.768125	0.779286
40.73	22.87	0	48.44	0	39.3	0		40.73	3.81167	3.0275	2.80714
47.24	20.45	0	46.54	0	35.07	0		47.24	3.40833	2.90875	2.505
53.74	19.15	0	45.51	0	35.45	0		53.74	3.19167	2.84437	2.53214
60.33	1.48	0	1.46	0	1.53	0		60.33	0.246667	0.09125	0.109286
66.84	1.77	0	2.35	0	2.83	0		66.84	0.295	0.146875	0.202143
73.35	1.01	0	2.2	0	2.05	0		73.35	0.168333	0.1375	0.146429

## Sheet: Mitochondria activity-3
Assay Name	20201228_Mito stress
Normalized	No
Baseline	No
Background Correction	True
Widget Title	Kinetic Graph
Data Type	OCR
Units	pmol/min
								Per blastocyst
Time (minutes)	FB		0.05		0.2			Time (minutes)	FB	0.05	0.2
	Mean	Std Dev	Mean	Std Dev	Mean	Std Dev			Mean	Mean	Mean
1.53	22.82	0	22.54	0	21.14	0		1.53	2.53556	2.50444	2.34889
8.04	22.15	0	21.41	0	18.79	0		8.04	2.46111	2.37889	2.08778
14.54	20.63	0	19.72	0	16.38	0		14.54	2.29222	2.19111	1.82
21.13	7.04	0	8.24	0	5.15	0		21.13	0.782222	0.915556	0.572222
27.64	6.62	0	7.69	0	6.45	0		27.64	0.735556	0.854444	0.716667
34.14	5.98	0	7.57	0	6.52	0		34.14	0.664444	0.841111	0.724444
40.73	34.24	0	25.63	0	22.38	0		40.73	3.80444	2.84778	2.48667
47.24	36.61	0	23.16	0	18.59	0		47.24	4.06778	2.57333	2.06556
53.74	37.53	0	24.07	0	19.12	0		53.74	4.17	2.67444	2.12444
60.33	1.59	0	1.28	0	1.02	0		60.33	0.176667	0.142222	0.113333
66.84	1.38	0	1.29	0	1.22	0		66.84	0.153333	0.143333	0.135556
73.35	2.2	0	2.31	0	1.87	0		73.35	0.244444	0.256667	0.207778

## Sheet: Mitochondria activity-4
Assay Name	20201229_Mito stress
Normalized	No
Baseline	No
Background Correction	True
Widget Title	Kinetic Graph
Data Type	OCR
Units	pmol/min
Time (minutes)	FB-1		5%-1		20%-1		FB-2		5%-2		20%-2
	Mean	Std Dev	Mean	Std Dev	Mean	Std Dev	Mean	Std Dev	Mean	Std Dev	Mean	Std Dev
1.53	28.4	0	25.52	0	18.23	0	29.69	0	23.59	0	18.25	0
8.04	28.32	0	24.42	0	18.97	0	30.49	0	22.58	0	15.08	0
14.54	26.48	0	22.49	0	14.53	0	25.2	0	21.27	0	15.84	0
21.13	12.49	0	11.93	0	10.48	0	13.58	0	12.48	0	11.48	0
27.64	11.3	0	11.49	0	9.48	0	13.02	0	10.57	0	12.56	0
34.14	9.02	0	10.42	0	9.92	0	9.48	0	9.55	0	9.33	0
40.73	42.3	0	27.58	0	22.49	0	40.28	0	29.48	0	23.48	0
47.24	40.85	0	26.48	0	25.38	0	39.58	0	30.31	0	23.01	0
53.74	37.27	0	24.67	0	24.38	0	36.49	0	27.44	0	21.57	0
60.33	1.52	0	2.31	0	1.39	0	1.45	0	2.41	0	1.26	0
66.84	1.48	0	0.68	0	0.94	0	0.79	0	0.79	0	0.4	0
73.35	1.22	0	0.75	0	0.85	0	0.47	0	1.32	0	0.39	0
Per blastocyst
Time (minutes)	FB		0.05		0.2
	F-1	F-2	5%-1	5%-2	20%-1	20%-2
1.53	2.84	2.969	2.552	2.359	1.823	1.825
8.04	2.832	3.049	2.442	2.258	1.897	1.508
14.54	2.648	2.52	2.249	2.127	1.453	1.584
21.13	1.249	1.358	1.193	1.248	1.048	1.148
27.64	1.13	1.302	1.149	1.057	0.948	1.256
34.14	0.902	0.948	1.042	0.955	0.992	0.933
40.73	4.23	4.028	2.758	2.948	2.249	2.348
47.24	4.085	3.958	2.648	3.031	2.538	2.301
53.74	3.727	3.649	2.467	2.744	2.438	2.157
60.33	0.152	0.145	0.231	0.241	0.139	0.126
66.84	0.148	0.079	0.068	0.079	0.094	0.04
73.35	0.122	0.047	0.075	0.132	0.085	0.039
