# Supplementary material for: Murine blastocysts generated by in vitro fertilization show increased Warburg metabolism and altered lactate production
Source: eLife. 2022 Sep 15;11:e79153. doi: 10.7554/eLife.79153 (PMC9519152; doi:10.7554/eLife.79153)
Supplement: Figure 3—source data 2. [file elife-79153-fig3-data2.xlsx]

## Sheet: Mitochondria activity-1
121520					Non-mitochondrial oxygen consumption
Per blastocyst					FB	0.05	0.2
Time (minutes)	FB	0.05	0.2		0.175	0.176429	0.134
	Mean	Mean	Mean
1.53	2.76	2.11929	1.59267		Basal Respiration
8.05	2.65833	2.00286	1.436		FB	0.05	0.2
14.58	2.34667	1.86643	1.528		2.17167	1.69	1.394
21.18	1.045	1.03571	0.767333
27.68	0.928333	0.977857	0.71		Maximal Respiration
34.16	0.931667	0.823571	0.802667		FB	0.05	0.2
40.76	4.285	3.45357	3.02867		4.11	3.27714	2.89467
47.29	3.90167	3.08857	2.994
53.81	3.63833	2.84143	2.396		H+ leak
60.41	0.593333	0.176429	0.134		FB	0.05	0.2
66.94	0.375	0.21	0.178		0.753333	0.647143	0.576
73.46	0.175	0.192857	0.206667
					ATP Production
					FB	0.05	0.2
					1.41833	1.04286	0.818
					Spare respiratory capacity
					FB	0.05	0.2
					1.93833	1.58714	1.50067

## Sheet: Mitochondria activity-2
122120					Non-mitochondrial oxygen consumption
Per blastocyst					FB	0.05	0.2
Time (minutes)	FB	0.05	0.2		0.168333	0.09125	0.109286
	Mean	Mean	Mean
1.53	2.86833	2.21687	1.965		Basal Respiration
8.04	2.33833	2.17813	1.90643		FB	0.05	0.2
14.54	2.35667	2.0175	1.79286		2.18833	1.92625	1.68357
21.13	0.92	0.883125	0.823571
27.64	1.135	0.9075	0.755		Maximal Respiration
34.14	0.995	0.768125	0.779286		FB	0.05	0.2
40.73	3.81167	3.0275	2.80714		3.64333	2.93625	2.69786
47.24	3.40833	2.90875	2.505
53.74	3.19167	2.84437	2.53214		H+ leak
60.33	0.246667	0.09125	0.109286		FB	0.05	0.2
66.84	0.295	0.146875	0.202143		0.751667	0.676875	0.645714
73.35	0.168333	0.1375	0.146429
					ATP Production
					FB	0.05	0.2
					1.43667	1.24938	1.03786
					Spare respiratory capacity
					FB	0.05	0.2
					1.455	1.01	1.01429

## Sheet: Mitochondria activity-3
Per blastocyst					Non-mitochondrial oxygen consumption
Time (minutes)	FB	0.05	0.2		FB	0.05	0.2
	Mean	Mean	Mean		0.153333	0.142222	0.113333
1.53	2.53556	2.50444	2.34889
8.04	2.46111	2.37889	2.08778		Basal Respiration
14.54	2.29222	2.19111	1.82		FB	0.05	0.2
21.13	0.782222	0.915556	0.572222		2.13889	2.04889	1.70667
27.64	0.735556	0.854444	0.716667
34.14	0.664444	0.841111	0.724444		Maximal Respiration
40.73	3.80444	2.84778	2.48667		FB	0.05	0.2
47.24	4.06778	2.57333	2.06556		4.01667	2.70556	2.37333
53.74	4.17	2.67444	2.12444
60.33	0.176667	0.142222	0.113333		H+ leak
66.84	0.153333	0.143333	0.135556		FB	0.05	0.2
73.35	0.244444	0.256667	0.207778		0.511111	0.698889	0.458889
					ATP Production
					FB	0.05	0.2
					1.62778	1.35	1.24778
					Spare respiratory capacity
					FB	0.05	0.2
					1.87778	0.656667	0.666667

## Sheet: Mitochondria activity-4
Per blastocyst								Non-mitochondrial oxygen consumption
Time (minutes)	FB		0.05		0.2			FB	0.05	0.2
	F-1	F-2	5%-1	5%-2	20%-1	20%-2		0.122	0.068	0.085
1.53	2.84	2.969	2.552	2.359	1.823	1.825		0.047	0.079	0.039
8.04	2.832	3.049	2.442	2.258	1.897	1.508		Basal Respiration
14.54	2.648	2.52	2.249	2.127	1.453	1.584		FB	0.05	0.2
21.13	1.249	1.358	1.193	1.248	1.048	1.148		2.526	2.181	1.368
27.64	1.13	1.302	1.149	1.057	0.948	1.256		2.473	2.048	1.545
34.14	0.902	0.948	1.042	0.955	0.992	0.933		Maximal Respiration
40.73	4.23	4.028	2.758	2.948	2.249	2.348		FB	0.05	0.2
47.24	4.085	3.958	2.648	3.031	2.538	2.301		4.108	2.69	2.453
53.74	3.727	3.649	2.467	2.744	2.438	2.157		3.981	2.952	2.309
60.33	0.152	0.145	0.231	0.241	0.139	0.126		H+ leak
66.84	0.148	0.079	0.068	0.079	0.094	0.04		FB	0.05	0.2
73.35	0.122	0.047	0.075	0.132	0.085	0.039		0.78	0.974	0.863
								0.901	0.876	0.894
								ATP Production
								FB	0.05	0.2
								1.746	1.207	0.505
								1.572	1.172	0.651
								Spare respiratory capacity
								FB	0.05	0.2
								1.582	0.509	1.085
								1.508	0.904	0.764

## Sheet: Equation
Seahorse Cell Mito Stress test Parameter Equations
Non-mitochondrial Oxygen Consumption
Minimum rate measurement after Rotenone/antimycin A injection
Basal Respiration
(Last rate measurement before first injection) – (Non-Mitochondrial Respiration Rate)
Maximal Respiration
(Maximum rate measurement after FCCP injection) – (Non-Mitochondrial Respiration)
H+ (Proton) Leak
(Minimum rate measurement after Oligomycin injection) – (Non-Mitochondrial Respiration
ATP Production
(Last rate measurement before Oligomycin injection) – (Minimum rate measurement after Oligomycin injection)
Spare Respiratory Capacity
(Maximal Respiration) – (Basal Respiration)
Spare Respiratory Capacity as a %
(Maximal Respiration) / (Basal Respiration) × 100
Acute Response
(Last rate measurement before oligomycin Injection) – (Last rate measurement before acute injection)
Coupling Efficiency
ATP Production Rate) / (Basal Respiration Rate) × 100
