# Supplementary material for: Murine blastocysts generated by in vitro fertilization show increased Warburg metabolism and altered lactate production
Source: eLife. 2022 Sep 15;11:e79153. doi: 10.7554/eLife.79153 (PMC9519152; doi:10.7554/eLife.79153)
Supplement: Figure 3—source data 3. [file elife-79153-fig3-data3.xlsx]

## Sheet: Kinetic Graph_ECAR
1st	4							2nd	4							3rd	6
Time (minutes)	FB		0.05		0.2			Time (minutes)	FB		0.05		0.2			Time (minutes)	FB		0.05		0.2
	Mean	Std Dev	Mean	Std Dev	Mean	Std Dev			Mean	Std Dev	Mean	Std Dev	Mean	Std Dev			Mean	Std Dev	Mean	Std Dev	Mean	Std Dev
1.53479	2.53799	0	2.92184	0	3.87109	0		1.53479	3.444	0	3.40204	0	4.47221	0		1.53479	2.77866	0	3.557	0	3.75061	0
8.01946	2.64452	0	2.80274	0	3.68868	0		8.01946	3.52509	0	3.75371	0	4.39882	0		8.01946	2.76982	0	3.43454	0	3.55886	0
14.5036	2.50343	0	2.81552	0	3.70017	0		14.5036	3.43952	0	3.46632	0	4.48156	0		14.5036	2.36733	0	3.28388	0	3.90189	0
21.0706	1.82705	0	2.22534	0	2.82743	0		21.0706	2.19241	0	2.61133	0	2.39368	0		21.0706	0.986012	0	2.5418	0	3.00187	0
27.5566	2.07388	0	2.53203	0	3.03457	0		27.5566	2.98846	0	3.09799	0	2.66595	0		27.5566	1.0346	0	2.61694	0	2.58297	0
34.0436	2.09126	0	2.52672	0	2.73667	0		34.0436	2.55963	0	3.05922	0	2.47981	0		34.0436	1.13871	0	2.41224	0	2.40702	0
40.608	1.66646	0	1.73931	0	1.72259	0		40.608	2.18331	0	2.10404	0	1.67158	0		40.608	0.82808	0	2.03244	0	2.06368	0
47.0945	1.28332	0	0.902491	0	1.09245	0		47.0945	1.45632	0	1.28231	0	0.972951	0		47.0945	0.733021	0	1.62298	0	1.39109	0
53.6203	1.33575	0	1.15208	0	1.64361	0		53.6203	1.3242	0	1.42988	0	0.969255	0		53.6203	0.58402	0	1.35902	0	0.825598	0
60.1075	1.02101	0	1.07993	0	0.974051	0		60.1075	1.18342	0	0.907559	0	0.957548	0		60.1075	0.750817	0	1.58574	0	1.2618	0
66.632	0.896538	0	0.644185	0	1.38294	0		66.632	1.07523	0	0.973159	0	0.975147	0		66.632	0.644957	0	1.19847	0	1.00191	0
1st								2nd								3rd
Time (minutes)	FB		0.05		0.2			Time (minutes)	FB		0.05		0.2			Time (minutes)	FB		0.05		0.2
	Mean	Std Dev	Mean	Std Dev	Mean	Std Dev			Mean	Std Dev	Mean	Std Dev	Mean	Std Dev			Mean	Std Dev	Mean	Std Dev	Mean	Std Dev
1.53479	0.253799	0	0.292184	0	0.387109	0	0	0.153479	0.3444	0	0.340204	0	0.447221	0	0	0.153479	0.277866	0	0.3557	0	0.375061	0
8.01946	0.264452	0	0.280274	0	0.368868	0	0	0.801946	0.352509	0	0.375371	0	0.439882	0	0	0.801946	0.276982	0	0.343454	0	0.355886	0
14.5036	0.250343	0	0.281552	0	0.370017	0	0	1.45036	0.343952	0	0.346632	0	0.448156	0	0	1.45036	0.236733	0	0.328388	0	0.390189	0
21.0706	0.182705	0	0.222534	0	0.282743	0	0	2.10706	0.219241	0	0.261133	0	0.239368	0	0	2.10706	0.0986012	0	0.25418	0	0.300187	0
27.5566	0.207388	0	0.253203	0	0.303457	0	0	2.75566	0.298846	0	0.309799	0	0.266595	0	0	2.75566	0.10346	0	0.261694	0	0.258297	0
34.0436	0.209126	0	0.252672	0	0.273667	0	0	3.40436	0.255963	0	0.305922	0	0.247981	0	0	3.40436	0.113871	0	0.241224	0	0.240702	0
40.608	0.166646	0	0.173931	0	0.172259	0	0	4.0608	0.218331	0	0.210404	0	0.167158	0	0	4.0608	0.082808	0	0.203244	0	0.206368	0
47.0945	0.128332	0	0.0902491	0	0.109245	0	0	4.70945	0.145632	0	0.128231	0	0.0972951	0	0	4.70945	0.0733021	0	0.162298	0	0.139109	0
53.6203	0.133575	0	0.115208	0	0.164361	0	0	5.36203	0.13242	0	0.142988	0	0.0969255	0	0	5.36203	0.058402	0	0.135902	0	0.0825598	0
60.1075	0.102101	0	0.107993	0	0.0974051	0	0	6.01075	0.118342	0	0.0907559	0	0.0957548	0	0	6.01075	0.0750817	0	0.158574	0	0.12618	0
66.632	0.0896538	0	0.0644185	0	0.138294	0	0	6.6632	0.107523	0	0.0973159	0	0.0975147	0	0	6.6632	0.0644957	0	0.119847	0	0.100191	0

## Sheet: Kinetic Graph_PER
1st								2nd								3rd
Time (minutes)	FB		0.05		0.2			Time (minutes)	FB		0.05		0.2			Time (minutes)	FB		0.05		0.2
	Mean	Std Dev	Mean	Std Dev	Mean	Std Dev			Mean	Std Dev	Mean	Std Dev	Mean	Std Dev			Mean	Std Dev	Mean	Std Dev	Mean	Std Dev
1.53479	26.2284	0	31.9362	0	36.6325	0		1.53479	26.6197	0	31.3237	0	38.873	0		1.53479	27.948	0	31.4387	0	36.8045	0
8.01946	27.5253	0	30.6414	0	35.8911	0		8.01946	27.7371	0	31.3499	0	36.9007	0		8.01946	27.3283	0	32.0174	0	37.8945	0
14.5036	27.0421	0	30.2437	0	36.4843	0		14.5036	26.6456	0	32.8347	0	36.9965	0		14.5036	27.372	0	32.8376	0	36.1973	0
21.0706	25.9296	0	28.7393	0	32.9866	0		21.0706	28.5069	0	28.4621	0	30.9268	0		21.0706	24.7299	0	25.7049	0	28.9504	0
27.5566	25.6911	0	28.923	0	32.4681	0		27.5566	27.1428	0	27.9155	0	29.8678	0		27.5566	25.3275	0	26.4898	0	26.2502	0
34.0436	26.0581	0	29.13	0	30.611	0		34.0436	26.3621	0	28.8864	0	28.799	0		34.0436	25.5275	0	24.5114	0	24.4746	0
40.608	23.8477	0	24.3617	0	24.2437	0		40.608	24.4938	0	26.9345	0	23.8838	0		40.608	22.0361	0	20.532	0	20.7524	0
47.0945	22.1426	0	19.4561	0	20.7961	0		47.0945	23.363	0	22.1355	0	19.9531	0		47.0945	21.9516	0	18.2296	0	16.5938	0
53.6203	21.0143	0	19.7187	0	23.1861	0		53.6203	20.9329	0	21.6784	0	18.429	0		53.6203	22.7938	0	18.2609	0	14.4979	0
60.1075	19.225	0	19.6406	0	18.8938	0		60.1075	20.3707	0	18.4247	0	18.7773	0		60.1075	21.7655	0	17.6553	0	15.3701	0
66.632	17.4191	0	15.639	0	20.8504	0		66.632	18.6797	0	17.9596	0	17.9737	0		66.632	21.0346	0	14.9392	0	13.5526	0
1st								2nd								3rd
Time (minutes)	FB		0.05		0.2			Time (minutes)	FB		0.05		0.2			Time (minutes)	FB		0.05		0.2
	Mean	Std Dev	Mean	Std Dev	Mean	Std Dev			Mean	Std Dev	Mean	Std Dev	Mean	Std Dev			Mean	Std Dev	Mean	Std Dev	Mean	Std Dev
1.53479	2.62284	0	3.19362	0	3.66325	0	0	0.153479	2.66197	0	3.13237	0	3.8873	0	0	0.153479	2.7948	0	3.14387	0	3.68045	0
8.01946	2.75253	0	3.06414	0	3.58911	0	0	0.801946	2.77371	0	3.13499	0	3.69007	0	0	0.801946	2.73283	0	3.20174	0	3.78945	0
14.5036	2.70421	0	3.02437	0	3.64843	0	0	1.45036	2.66456	0	3.28347	0	3.69965	0	0	1.45036	2.7372	0	3.28376	0	3.61973	0
21.0706	2.59296	0	2.87393	0	3.29866	0	0	2.10706	2.85069	0	2.84621	0	3.09268	0	0	2.10706	2.47299	0	2.57049	0	2.89504	0
27.5566	2.56911	0	2.8923	0	3.24681	0	0	2.75566	2.71428	0	2.79155	0	2.98678	0	0	2.75566	2.53275	0	2.64898	0	2.62502	0
34.0436	2.60581	0	2.913	0	3.0611	0	0	3.40436	2.63621	0	2.88864	0	2.8799	0	0	3.40436	2.55275	0	2.45114	0	2.44746	0
40.608	2.38477	0	2.43617	0	2.42437	0	0	4.0608	2.44938	0	2.69345	0	2.38838	0	0	4.0608	2.20361	0	2.0532	0	2.07524	0
47.0945	2.21426	0	1.94561	0	2.07961	0	0	4.70945	2.3363	0	2.21355	0	1.99531	0	0	4.70945	2.19516	0	1.82296	0	1.65938	0
53.6203	2.10143	0	1.97187	0	2.31861	0	0	5.36203	2.09329	0	2.16784	0	1.8429	0	0	5.36203	2.27938	0	1.82609	0	1.44979	0
60.1075	1.9225	0	1.96406	0	1.88938	0	0	6.01075	2.03707	0	1.84247	0	1.87773	0	0	6.01075	2.17655	0	1.76553	0	1.53701	0
66.632	1.74191	0	1.5639	0	2.08504	0	0	6.6632	1.86797	0	1.79596	0	1.79737	0	0	6.6632	2.10346	0	1.49392	0	1.35526	0

## Sheet: Basal Glycolysis
Assay Name	XF Glycolytic Rate Assay-20210119_040204
Normalized	No
Baseline	No
Background Correction	True
Widget Title	Basal Glycolysis
Data Type	PER
Units	pmol/min
1st				2nd				3rd
Group	Value	Std Dev		Group	Value	Std Dev		Group	Value	Std Dev
FB	1.426	0		FB	1.696	0		FB	1.534	0
0.05	1.352	0		0.05	1.253	0		0.05	1.142	0
0.2	0.861	0		0.2	0.972	0		0.2	0.912	0

## Sheet: % PER from Glycolysis
Assay Name	XF Glycolytic Rate Assay-20210119_040204
Normalized	No
Baseline	No
Background Correction	True
Widget Title	% PER from Glycolysis (Basal)
Data Type	PER
Units	n/a
%PER from Gly	10
1st				2nd				3rd
Group	Value	Std Dev		Group	Value	Std Dev		Group	Value	Std Dev
FB	52.8148			FB	63.7594			FB	55.9854
0.05	44.7682			0.05	38.2012			0.05	40.9146
0.2	23.589			0.2	26.2703			0.2	25.1934
Basal Glycolysis
1st				2nd				3rd
Group	Value	Std Dev		Group	Value	Std Dev		Group	Value	Std Dev
FB	1.426			FB	1.696			FB	1.534
0.05	1.352			0.05	1.253			0.05	1.342
0.2	0.861			0.2	0.972			0.2	0.912
Basal PER
1st				2nd				3rd
FB	2.7			FB	2.66			FB	2.74
0.05	3.02			0.05	3.28			0.05	3.28
0.2	3.65			0.2	3.7			0.2	3.62

## Sheet: Compensatory Glycolysis
Assay Name	XF Glycolytic Rate Assay-20210119_040204
Normalized	No
Baseline	No
Background Correction	True
Widget Title	Compensatory Glycolysis
Data Type	PER
Units	n/a
Compensatory Glycolysis
1st				2nd				3rd
Group	Value	Std Dev		Group	Value	Std Dev		Group	Value	Std Dev
FB	1.058			FB	1.253			FB	1.123
0.05	0.896			0.05	0.985			0.05	0.885
0.2	0.755			0.2	0.815			0.2	0.794
Compensatory Glycolysis
1st				2nd				3rd
Group	Value	Std Dev		Group	Value	Std Dev		Group	Value	Std Dev
FB	10.58			FB	12.53			FB	11.23
0.05	8.96			0.05	9.85			0.05	8.85
0.2	7.55			0.2	8.15			0.2	7.94
