# Supplementary material for: Murine blastocysts generated by in vitro fertilization show increased Warburg metabolism and altered lactate production
Source: eLife. 2022 Sep 15;11:e79153. doi: 10.7554/eLife.79153 (PMC9519152; doi:10.7554/eLife.79153)
Supplement: Figure 3—source data 4. [file elife-79153-fig3-data4.xlsx]

## Sheet: Kinetic Graph_OCR
Assay Name	XF Glycolytic Rate Assay-20210119_040204
Normalized	No
Baseline	No
Background Correction	True
Widget Title	Kinetic Graph
Data Type	OCR
Units	pmol/min
								2nd								3rd
Time (minutes)	FB		0.05		0.2			Time (minutes)	FB		0.05		0.2			Time (minutes)	FB		0.05		0.2
	Mean	Std Dev	Mean	Std Dev	Mean	Std Dev			Mean	Std Dev	Mean	Std Dev	Mean	Std Dev			Mean	Std Dev	Mean	Std Dev	Mean	Std Dev
1.53479	29.3112	0	18.4702	0	17.5125	0		1.53479	23.8629	0	17.3903	0	13.0776	0		1.53479	24.8822	0	20.9698	0	14.9462	0
8.01946	28.9398	0	17.3347	0	17.2115	0		8.01946	22.8088	0	16.9313	0	12.8531	0		8.01946	21.9179	0	19.7496	0	14.6747	0
14.5036	29.3319	0	18.1443	0	17.5928	0		14.5036	23.1779	0	16.6212	0	12.3972	0		14.5036	22.5336	0	20.2248	0	13.8009	0
21.0706	4.37627	0	3.40063	0	3.17362	0		21.0706	5.8981	0	2.62812	0	3.32038	0		21.0706	5.45918	0	3.13857	0	4.21331	0
27.5566	4.72217	0	2.80838	0	3.81755	0		27.5566	4.79511	0	2.14699	0	2.30245	0		27.5566	2.27095	0	3.16937	0	3.38551	0
34.0436	4.21496	0	3.58676	0	3.61459	0		34.0436	5.11012	0	3.26374	0	3.768	0		34.0436	2.54561	0	2.74034	0	4.13203	0
40.608	3.25668	0	2.39166	0	2.14442	0		40.608	3.36987	0	0.833987	0	2.19672	0		40.608	1.36551	0	1.11147	0	3.19526	0
47.0945	4.67606	0	3.25247	0	2.96242	0		47.0945	4.52424	0	2.05785	0	1.0794	0		47.0945	2.65459	0	3.00448	0	4.01654	0
53.6203	4.50857	0	2.36583	0	3.29857	0		53.6203	4.53776	0	2.6727	0	2.73856	0		53.6203	2.14798	0	2.84967	0	3.9883	0
60.1075	4.82534	0	3.02073	0	2.73961	0		60.1075	5.2701	0	1.88581	0	1.83451	0		60.1075	2.82277	0	4.2997	0	4.65708	0
66.632	3.45786	0	2.70854	0	2.51344	0		66.632	4.08772	0	1.5378	0	2.89934	0		66.632	2.25534	0	2.5915	0	3.77792	0
1st								2nd								3rd
Time (minutes)	FB		0.05		0.2			Time (minutes)	FB		0.05		0.2			Time (minutes)	FB		0.05		0.2
	Mean	Std Dev	Mean	Std Dev	Mean	Std Dev			Mean	Std Dev	Mean	Std Dev	Mean	Std Dev			Mean	Std Dev	Mean	Std Dev	Mean	Std Dev
1.53479	2.93112	0	1.84702	0	1.75125	0		1.53479	2.38629	0	1.73903	0	1.30776	0		1.53479	2.48822	0	2.09698	0	1.49462	0
8.01946	2.89398	0	1.73347	0	1.72115	0		8.01946	2.28088	0	1.69313	0	1.28531	0		8.01946	2.19179	0	1.97496	0	1.46747	0
14.5036	2.93319	0	1.81443	0	1.75928	0		14.5036	2.31779	0	1.66212	0	1.23972	0		14.5036	2.25336	0	2.02248	0	1.38009	0
21.0706	0.437627	0	0.340063	0	0.317362	0		21.0706	0.58981	0	0.262812	0	0.332038	0		21.0706	0.545918	0	0.313857	0	0.421331	0
27.5566	0.472217	0	0.280838	0	0.381755	0		27.5566	0.479511	0	0.214699	0	0.230245	0		27.5566	0.227095	0	0.316937	0	0.338551	0
34.0436	0.421496	0	0.358676	0	0.361459	0		34.0436	0.511012	0	0.326374	0	0.3768	0		34.0436	0.254561	0	0.274034	0	0.413203	0
40.608	0.325668	0	0.239166	0	0.214442	0		40.608	0.336987	0	0.0833987	0	0.219672	0		40.608	0.136551	0	0.111147	0	0.319526	0
47.0945	0.467606	0	0.325247	0	0.296242	0		47.0945	0.452424	0	0.205785	0	0.10794	0		47.0945	0.265459	0	0.300448	0	0.401654	0
53.6203	0.450857	0	0.236583	0	0.329857	0		53.6203	0.453776	0	0.26727	0	0.273856	0		53.6203	0.214798	0	0.284967	0	0.39883	0
60.1075	0.482534	0	0.302073	0	0.273961	0		60.1075	0.52701	0	0.188581	0	0.183451	0		60.1075	0.282277	0	0.42997	0	0.465708	0
66.632	0.345786	0	0.270854	0	0.251344	0		66.632	0.408772	0	0.15378	0	0.289934	0		66.632	0.225534	0	0.25915	0	0.377792	0

## Sheet: Kinetic Graph_ECAR
1st	4							2nd	4							3rd	6
Time (minutes)	FB		0.05		0.2			Time (minutes)	FB		0.05		0.2			Time (minutes)	FB		0.05		0.2
	Mean	Std Dev	Mean	Std Dev	Mean	Std Dev			Mean	Std Dev	Mean	Std Dev	Mean	Std Dev			Mean	Std Dev	Mean	Std Dev	Mean	Std Dev
1.53479	2.53799	0	2.92184	0	3.87109	0		1.53479	3.444	0	3.40204	0	4.47221	0		1.53479	2.77866	0	3.557	0	3.75061	0
8.01946	2.64452	0	2.80274	0	3.68868	0		8.01946	3.52509	0	3.75371	0	4.39882	0		8.01946	2.76982	0	3.43454	0	3.55886	0
14.5036	2.50343	0	2.81552	0	3.70017	0		14.5036	3.43952	0	3.46632	0	4.48156	0		14.5036	2.36733	0	3.28388	0	3.90189	0
21.0706	1.82705	0	2.22534	0	2.82743	0		21.0706	2.19241	0	2.61133	0	2.39368	0		21.0706	0.986012	0	2.5418	0	3.00187	0
27.5566	2.07388	0	2.53203	0	3.03457	0		27.5566	2.98846	0	3.09799	0	2.66595	0		27.5566	1.0346	0	2.61694	0	2.58297	0
34.0436	2.09126	0	2.52672	0	2.73667	0		34.0436	2.55963	0	3.05922	0	2.47981	0		34.0436	1.13871	0	2.41224	0	2.40702	0
40.608	1.66646	0	1.73931	0	1.72259	0		40.608	2.18331	0	2.10404	0	1.67158	0		40.608	0.82808	0	2.03244	0	2.06368	0
47.0945	1.28332	0	0.902491	0	1.09245	0		47.0945	1.45632	0	1.28231	0	0.972951	0		47.0945	0.733021	0	1.62298	0	1.39109	0
53.6203	1.33575	0	1.15208	0	1.64361	0		53.6203	1.3242	0	1.42988	0	0.969255	0		53.6203	0.58402	0	1.35902	0	0.825598	0
60.1075	1.02101	0	1.07993	0	0.974051	0		60.1075	1.18342	0	0.907559	0	0.957548	0		60.1075	0.750817	0	1.58574	0	1.2618	0
66.632	0.896538	0	0.644185	0	1.38294	0		66.632	1.07523	0	0.973159	0	0.975147	0		66.632	0.644957	0	1.19847	0	1.00191	0
1st								2nd								3rd
Time (minutes)	FB		0.05		0.2			Time (minutes)	FB		0.05		0.2			Time (minutes)	FB		0.05		0.2
	Mean	Std Dev	Mean	Std Dev	Mean	Std Dev			Mean	Std Dev	Mean	Std Dev	Mean	Std Dev			Mean	Std Dev	Mean	Std Dev	Mean	Std Dev
1.53479	0.253799	0	0.292184	0	0.387109	0	0	0.153479	0.3444	0	0.340204	0	0.447221	0	0	0.153479	0.277866	0	0.3557	0	0.375061	0
8.01946	0.264452	0	0.280274	0	0.368868	0	0	0.801946	0.352509	0	0.375371	0	0.439882	0	0	0.801946	0.276982	0	0.343454	0	0.355886	0
14.5036	0.250343	0	0.281552	0	0.370017	0	0	1.45036	0.343952	0	0.346632	0	0.448156	0	0	1.45036	0.236733	0	0.328388	0	0.390189	0
21.0706	0.182705	0	0.222534	0	0.282743	0	0	2.10706	0.219241	0	0.261133	0	0.239368	0	0	2.10706	0.0986012	0	0.25418	0	0.300187	0
27.5566	0.207388	0	0.253203	0	0.303457	0	0	2.75566	0.298846	0	0.309799	0	0.266595	0	0	2.75566	0.10346	0	0.261694	0	0.258297	0
34.0436	0.209126	0	0.252672	0	0.273667	0	0	3.40436	0.255963	0	0.305922	0	0.247981	0	0	3.40436	0.113871	0	0.241224	0	0.240702	0
40.608	0.166646	0	0.173931	0	0.172259	0	0	4.0608	0.218331	0	0.210404	0	0.167158	0	0	4.0608	0.082808	0	0.203244	0	0.206368	0
47.0945	0.128332	0	0.0902491	0	0.109245	0	0	4.70945	0.145632	0	0.128231	0	0.0972951	0	0	4.70945	0.0733021	0	0.162298	0	0.139109	0
53.6203	0.133575	0	0.115208	0	0.164361	0	0	5.36203	0.13242	0	0.142988	0	0.0969255	0	0	5.36203	0.058402	0	0.135902	0	0.0825598	0
60.1075	0.102101	0	0.107993	0	0.0974051	0	0	6.01075	0.118342	0	0.0907559	0	0.0957548	0	0	6.01075	0.0750817	0	0.158574	0	0.12618	0
66.632	0.0896538	0	0.0644185	0	0.138294	0	0	6.6632	0.107523	0	0.0973159	0	0.0975147	0	0	6.6632	0.0644957	0	0.119847	0	0.100191	0
