# Supplementary material for: Murine blastocysts generated by in vitro fertilization show increased Warburg metabolism and altered lactate production
Source: eLife. 2022 Sep 15;11:e79153. doi: 10.7554/eLife.79153 (PMC9519152; doi:10.7554/eLife.79153)
Supplement: Figure 4—figure supplement 1—source data 1. [file elife-79153-fig4-figsupp1-data1.xlsx]

## Sheet: Lactate
Lactate															Average	Substract	Conc
S1	531.26	538.51	546.66		5% medium	886.02	974.57	900.52	900.79	976.99	879.14	886.99			915.003	376.193	227.595
S2	950.99	950.7	937.66		5% medium w/o BL	1218.9	1194.7	1154	1259.1	1189.9	1168	1214.4			1199.86	661.047	325.539
S3	1128.7	1228.2	1226.6		20% medium	853.69	854.26	813.54	838.56	859.99	845.95	835.9			843.127	304.317	202.882
S4	1785.3	1835.4	1780.2		20% medium w/o BL	1289.6	1149.5	1156.5	1159.5	1194.4	1128.1	1137.3			1173.56	634.747	316.496
S5	3227.4	3734.3	3094		FB	636.56	667.92	656.84	693.77	657.43					662.504	123.694	70.3881
S6	6856.2	6925.1	7069.7		5% BL	732.97	756.85	752.02	723.21	719.56					736.922	198.112	83.182
S7	11055	10468	11087		20% BL	769.74	790.17	829.76	780.52	766.34					787.306	248.496	91.844
S8	17450	17847	18152
uM	Intensity	Substract			substract	Tech Repli 1	Tech Repli 2	Tech Repli 3	Tech Repli 4	Tech Repli 5	Tech Repli 6	Tech Repli 7
0	538.81	0			5% medium	347.21	435.76	361.71	361.98	438.18	340.33	348.18
25	946.45	407.64			5% medium w/o BL	680.09	655.89	615.19	720.29	651.09	629.19	675.59
50	1194.5	655.69			20% medium	314.88	315.45	274.73	299.75	321.18	307.14	297.09
100	1800.3	1261.49			20% medium w/o BL	750.79	610.69	617.69	620.69	655.59	589.29	598.49
200	3351.9	2813.09
400	6950.33	6411.52
600	10870	10331.2
1000	17816.3	17277.5
					Concentration (uM)	Tech Repli 1	Tech Repli 2	Tech Repli 3	Tech Repli 4	Tech Repli 5	Tech Repli 6	Tech Repli 7
					5% medium	217.63	248.077	222.615	222.708	248.909	215.264	217.963
					5% medium w/o BL	332.087	323.766	309.772	345.909	322.116	314.586	330.54
					20% medium	206.513	206.709	192.708	201.311	208.68	203.852	200.397
					20% medium w/o BL	356.397	308.225	310.632	311.663	323.663	300.866	304.03
					Average Conc
					5% medium	227.595
					5% medium w/o BL	325.539
					20% medium	202.882
					20% medium w/o BL	316.496

## Sheet: Pyruvate
Pyruvate																Average	Substract	Conc
S1	455.4	470.24	452.75			5% medium	1904.16	2197.31	2081.06	2014.41	2102.25	2003.18	1886.57	1805.03		1999.25	1539.78	19.409
S2	1894	1799.2	1817.4			5% medium w/o BL	3104.01	3106.61	3105.29	3102.98	3105.8	3101.02	3107.83	3193.39		3115.87	2656.4	42.2788
S3	3568.9	3498.2	3212.6			20% medium	2004.31	2105.84	2103.91	2097.53	2197.85	2109.18	2106.33	2092.14		2102.14	1642.67	21.5163
S4	5617.6	5496.6	6356.3			20% medium w/o BL	3101.04	3102.7	3106.87	3110.22	3104.14	3091.79	3103.76	3289.91		3126.3	2666.84	42.4926
S5	12187	12350	12175
S6	14727	14608	13678
S7	18953	18134	17082
S8	23661	23569	23036
						substract	Tech Repli 1	Tech Repli 2	Tech Repli 3	Tech Repli 4	Tech Repli 5	Tech Repli 6	Tech Repli 7	Tech Repli 8
uM	Intensity	Substract				5% medium	1444.7	1737.85	1621.6	1554.95	1642.79	1543.72	1427.1	1345.57
0	459.463	3.33333e-05				5% medium w/o BL	2644.55	2647.15	2645.83	2643.52	2646.34	2641.56	2648.37	2733.93
3	1836.87	1377.4				20% medium	1544.85	1646.38	1644.45	1638.07	1738.39	1649.72	1646.87	1632.68
6	3426.57	2967.1				20% medium w/o BL	2641.58	2643.24	2647.41	2650.76	2644.68	2632.33	2644.3	2830.45
15	5823.5	5364.04
39	12237.3	11777.9
45	14337.7	13878.2
60	18056.3	17596.9
75	23422	22962.5				Concentration (uM)	Tech Repli 1	Tech Repli 2	Tech Repli 3	Tech Repli 4	Tech Repli 5	Tech Repli 6	Tech Repli 7	Tech Repli 8
						5% medium	17.4615	23.4656	21.0847	19.7195	21.5186	19.4895	17.1012	15.4312
						5% medium w/o BL	42.036	42.0892	42.0622	42.0149	42.0726	41.9747	42.1142	43.8667
						20% medium	19.5127	21.5921	21.5526	21.422	23.4767	21.6606	21.6022	21.3116
						20% medium w/o BL	41.9752	42.0091	42.0946	42.1632	42.0386	41.7858	42.0309	45.8435
						Average Conc
						5% medium	19.409
						5% medium w/o BL	42.2788
						20% medium	21.5163
						20% medium w/o BL	42.4926
