# Supplementary material for: Murine blastocysts generated by in vitro fertilization show increased Warburg metabolism and altered lactate production
Source: eLife. 2022 Sep 15;11:e79153. doi: 10.7554/eLife.79153 (PMC9519152; doi:10.7554/eLife.79153)
Supplement: Figure 4—source data 1. [file elife-79153-fig4-data1.xlsx]

## Sheet: Calibration_1
pH 6.22
	pH sensitive	subs	ph-subs	pH insensitive	subs	ph-subs	pH sen/insen			Avg_sen/insen			6.22	0.157526
FB													7.56	0.0790096
1	693.418	145.799	547.619	3593.12	234.394	3358.73	0.163043			0.163043	0.157526
2	731.457	129.169	602.288	3901.48	223.469	3678.01	0.163754			0.163754
3	821.19	135.181	686.009	4481.98	201.278	4280.71	0.160256			0.160256
4	857.813	132.116	725.697	4901.37	155.296	4746.07	0.152905			0.152905
5	901.18	148.303	752.877	5301.18	202.803	5098.38	0.14767			0.14767
pH 7.56
	pH sensitive	subs	ph-subs	pH insensitive	subs	ph-subs	pH sen/insen
FB
6	453.894	115.299	338.595	4680.92	207.187	4473.73	0.0756851			0.0756851	0.0790096
7	524.618	126.717	397.901	5276.68	255.895	5020.78	0.0792508			0.0792508
8	444.975	128.841	316.134	4378.55	201.189	4177.36	0.0756779			0.0756779
9	414.35	125.087	289.263	3629.19	219.709	3409.49	0.0848407			0.0848407
10	301.849	113.044	188.805	2530.43	158.311	2372.12	0.0795934			0.0795934

## Sheet: Intracellular pH_FB_1
1st								2nd
	pH sensitive	subs	ph-subs	pH insensitive	subs	ph-subs	pH sen/insen		pH sensitive	subs	ph-subs	pH insensitive	subs	ph-subs	pH sen/insen
FB								FB
1	372.024	115.726	256.298	2589.65	157.419	2432.23	0.105376	2	219.118	113.264	105.854	1272.27	222.518	1049.75	0.100837
2	426.854	114.363	312.491	2919.99	193.796	2726.2	0.114625	4	222.672	208.554	14.118	1252.51	115.098	1137.41	0.0124124
3	305.093	114.546	190.547	1987.3	170.996	1816.3	0.104909	5	182.683	109.453	73.23	853.835	148.912	704.923	0.103884
4	269.928	117.707	152.221	1767.85	212.433	1555.42	0.0978651	6	247.989	108.965	139.024	1485.35	135.972	1349.38	0.103028
5	266.593	120.037	146.556	1704.59	252.934	1451.65	0.100958	7	232.601	113.231	119.37	1389.87	160.229	1229.64	0.0970774
	Analysis		pH
1	0.105376		7.10963
2	0.114625		6.95179
3	0.104909		7.11759
4	0.0978651		7.2378
5	0.100958		7.18502
									Analysis			pH
								2	0.100837			7.18708
								4	0.0124124			8.69603
								5	0.103884			7.13509
								6	0.103028			7.14969
								7	0.0970774			7.25124

## Sheet: Intracellular pH_5%_1
		pH sensitive	subs	ph-subs	pH insensitive	subs	ph-subs	pH sen/insen
	0.05
	9	269.555	113.595	155.96	1779.03	179.487	1599.54	0.097503
	8	227.763	118.28	109.483	1436.01	279.153	1156.86	0.0946382
	Analysis	pH
1	0.097503	7.24398
2	0.0946382	7.29286

## Sheet: Intracellular pH_20%_1
		pH sensitive	subs	ph-subs	pH insensitive	subs	ph-subs	pH sen/insen
	0.2
	11	212.41	93.828	118.582	1642.41	216.632	1425.78	0.0831701
	10	285.153	132.152	153.001	1885.38	187.387	1697.99	0.090107
	Analysis	pH
1	0.0831701	7.48857
2	0.090107	7.37019

## Sheet: Calibration_2
pH 7.64
		pH sens	BG subst	Abs pH sen	pH insensitive	BG subst	Abs pH insen	pH sen/insen				Avg_sen/insen			6.26	0.221585
FB															7.64	0.41334
10	TB(28)	207.151	105.171	101.98	366.598	133.516	233.082	0.437528		143.236	327.611	0.437213	0.41334
	IM(39)	295.318	110.826	184.492	580.944	158.803	422.141	0.437039
9	TB(31)	247.201	105.202	141.999	468.862	129.505	339.357	0.418435		133.69	338.135	0.395375
	IM(43)	245.809	120.428	125.381	482.114	145.202	336.912	0.372148
8	TB(30)	308.118	115.563	192.555	607.24	138.22	469.02	0.410548		205.586	465.912	0.441255
	IM(30)	334.18	115.563	218.617	601.025	138.22	462.805	0.472374
7	TB(32)	294.495	123.124	171.371	576.604	133.451	443.153	0.386708		207.895	517.032	0.402093
	IM(39)	372.733	128.314	244.419	732.878	141.967	590.911	0.413631
6	TB(29)	292.001	117.07	174.931	569.249	123.688	445.561	0.392608		225.817	577.889	0.390762
	IM(36)	397.847	121.144	276.703	838.605	128.388	710.217	0.389603
pH 6.26
		pH sens	BG subst	Abs pH sen	pH insensitive	BG subst	Abs pH insen	pH sen/insen
FB
5	TB(31)	226.859	112.823	114.036	672.782	127.991	544.791	0.209321		116.95	553.829	0.211165	0.221585
	IM(43)	235.442	115.579	119.863	694.22	131.353	562.867	0.212951
4	TB(23)	334.846	114.839	220.007	1070.08	131.513	938.568	0.234407		221.016	939.946	0.235137
	IM(43)	339.01	116.985	222.025	1085.25	143.923	941.323	0.235865
3	TB(30)	246.577	116.887	129.69	741.196	135.131	606.065	0.213987		161.727	746.446	0.216663
	IM(30)	310.651	116.887	193.764	1021.96	135.131	886.827	0.218491
2	TB(28)	283.884	120.758	163.126	878.749	119.245	759.504	0.21478		212.188	994.689	0.21332
	IM(35)	385.581	124.332	261.249	1355.28	125.41	1229.87	0.212419
1	TB(24)	234.593	116.038	118.555	673.444	131.37	542.074	0.218706		165.213	713.231	0.231639
	IM(37)	331.358	119.488	211.87	1021.29	136.905	884.389	0.239567

## Sheet: Intracellular pH_5%_2
			pH sens	BG subst	Abs pH sen	pH insensitive	BG subst	Abs pH insen	pH sen/insen		results
0.05	0.05
5	1	BL(25)	227.834	120.907	106.927	433.849	137.517	296.332	0.360835		7.25997
4	2	BL(27)	243.702	113.696	130.006	445.656	105.557	340.099	0.382259		7.4141
3	3	BL(30)	264.106	125.22	138.886	498.407	133.586	364.821	0.380696		7.40285
1	4	BL(28)	287.518	120.168	167.35	574.656	128.917	445.739	0.375444		7.36506
10	5	BL(25)	200.294	113.555	86.739	342.548	113.159	229.389	0.378131		7.38439
9	6	BL(26)	199.693	120.086	79.607	346.646	128.084	218.562	0.364231		7.28439
9 . 1	7	BL(28)	263.381	129.28	134.101	508.945	156.936	352.009	0.380959		7.40474
8	8	BL(28)	224.709	117.467	107.242	412.441	124.977	287.464	0.373062		7.34793
7	9	BL(26)	251.407	132.222	119.185	519.421	192.977	326.444	0.365101		7.29065
6	10	BL(26)	293.131	113.335	179.796	590.378	114.302	476.076	0.377662		7.38102
5	11	BL(27)	173.644	112.545	61.099	284.564	114.27	170.294	0.358785		7.24522

## Sheet: Intracellular pH_20%_2
			pH sens	BG subst	Abs pH sen	pH insensitive	BG subst	Abs pH insen	pH sen/insen		results
0.2	0.2
4	1	BL(32)	227.499	113.572	113.927	396.259	116.094	280.165	0.406643		7.58951
3	2	BL(31)	231.961	130.568	101.393	401.532	145.463	256.069	0.39596		7.51266
2	3	BL(33)	161.35	112.626	48.724	232.257	111.718	120.539	0.404218		7.57207
1	4	BL(29)	247.371	128.749	118.622	427.561	137.177	290.384	0.4085		7.60288
11	5	BL(29)	258.312	116.951	141.361	465.004	123.872	341.132	0.414388		7.64524
