# Supplementary material for: Murine blastocysts generated by in vitro fertilization show increased Warburg metabolism and altered lactate production
Source: eLife. 2022 Sep 15;11:e79153. doi: 10.7554/eLife.79153 (PMC9519152; doi:10.7554/eLife.79153)
Supplement: Figure 4—source data 2. [file elife-79153-fig4-data2.xlsx]

## Sheet: NAD level
pmol	Standard			Repli1	Repli2	Repli3	Repli4	Repli5	Repli6
0	0.2505	0.2555	0.2612	0.31004	0.310615	0.303715	0.311305	0.31188	0.304635		FB
10	0.2711	0.2773	0.2772	0.28859	0.292215	0.29348	0.28974	0.29325	0.294515		0.05
15	0.2803	0.2904	0.2936	0.287615	0.28772	0.28543	0.285305	0.286755	0.286235		0.2
20	0.2933	0.3082	0.2986
30	0.3185	0.3148	0.3131
40	0.3239	0.3176	0.3418
				Substract
				0.054307	0.054882	0.047982	0.055572	0.056147	0.048902
				0.032857	0.036482	0.037747	0.034007	0.037517	0.038782
				0.031882	0.031987	0.029697	0.029572	0.031022	0.030502
Standard (pmol)	Average	substract		Conc
0	0.255733	0		28.615	28.9344	25.1011	29.3178	29.6372	25.6122
10	0.2752	0.019467		16.6983	18.7122	19.415	17.3372	19.2872	19.99
15	0.2881	0.032367		16.1567	16.215	14.9428	14.8733	15.6789	15.39
20	0.300033	0.0443003
30	0.315467	0.0597337
40	0.327767	0.0720337
