# Supplementary material for: Murine blastocysts generated by in vitro fertilization show increased Warburg metabolism and altered lactate production
Source: eLife. 2022 Sep 15;11:e79153. doi: 10.7554/eLife.79153 (PMC9519152; doi:10.7554/eLife.79153)
Supplement: Figure 4—source data 3. [file elife-79153-fig4-data3.xlsx]

## Sheet: Pyruvate
Pyruvate																Average	Substract	Conc
S1	455.4	470.24	452.75			5% medium	1904.16	2197.31	2081.06	2014.41	2102.25	2003.18	1886.57	1805.03		1999.25	1539.78	19.409
S2	1894	1799.2	1817.4			5% medium w/o BL	3104.01	3106.61	3105.29	3102.98	3105.8	3101.02	3107.83	3193.39		3115.87	2656.4	42.2788
S3	3568.9	3498.2	3212.6			20% medium	2004.31	2105.84	2103.91	2097.53	2197.85	2109.18	2106.33	2092.14		2102.14	1642.67	21.5163
S4	5617.6	5496.6	6356.3			20% medium w/o BL	3101.04	3102.7	3106.87	3110.22	3104.14	3091.79	3103.76	3289.91		3126.3	2666.84	42.4926
S5	12187	12350	12175			FB	1682.64	1653.42	1593.52	1624.64	1688.62					1648.57	1189.1	6.11331
S6	14727	14608	13678			5% BL	1456.96	1417.86	1494.84	1453.04	1527.78					1470.1	1010.63	4.28564
S7	18953	18134	17082			20% BL	1335.48	1389.46	1388.01	1401.38	1352.38					1373.34	913.878	3.29481
S8	23661	23569	23036
						substract	Tech Repli 1	Tech Repli 2	Tech Repli 3	Tech Repli 4	Tech Repli 5	Tech Repli 6	Tech Repli 7	Tech Repli 8
uM	Intensity	Substract				5% medium	1444.7	1737.85	1621.6	1554.95	1642.79	1543.72	1427.1	1345.57
0	459.463	3.33333e-05				5% medium w/o BL	2644.55	2647.15	2645.83	2643.52	2646.34	2641.56	2648.37	2733.93
3	1836.87	1377.4				20% medium	1544.85	1646.38	1644.45	1638.07	1738.39	1649.72	1646.87	1632.68
6	3426.57	2967.1				20% medium w/o BL	2641.58	2643.24	2647.41	2650.76	2644.68	2632.33	2644.3	2830.45
15	5823.5	5364.04				FB	1223.18	1193.96	1134.06	1165.18	1229.16
39	12237.3	11777.9				5% BL	997.497	958.397	1035.38	993.577	1068.32
45	14337.7	13878.2				20% BL	876.017	929.997	928.543	941.917	892.917
60	18056.3	17596.9
75	23422	22962.5				Concentration (uM)	Tech Repli 1	Tech Repli 2	Tech Repli 3	Tech Repli 4	Tech Repli 5	Tech Repli 6	Tech Repli 7	Tech Repli 8
						5% medium	17.4615	23.4656	21.0847	19.7195	21.5186	19.4895	17.1012	15.4312
						5% medium w/o BL	42.036	42.0892	42.0622	42.0149	42.0726	41.9747	42.1142	43.8667
						20% medium	19.5127	21.5921	21.5526	21.422	23.4767	21.6606	21.6022	21.3116
						20% medium w/o BL	41.9752	42.0091	42.0946	42.1632	42.0386	41.7858	42.0309	45.8435
						FB	6.46223	6.163	5.54958	5.86827	6.52347
						5% BL	4.15112	3.75071	4.53903	4.11097	4.87636
						20% BL	2.90708	3.45987	3.44498	3.58194	3.08015
						Average Conc
						5% medium	19.409
						5% medium w/o BL	42.2788
						20% medium	21.5163
						20% medium w/o BL	42.4926
						FB	6.11331
						5% BL	4.28564
						20% BL	3.29481
