# Supplementary material for: Murine blastocysts generated by in vitro fertilization show increased Warburg metabolism and altered lactate production
Source: eLife. 2022 Sep 15;11:e79153. doi: 10.7554/eLife.79153 (PMC9519152; doi:10.7554/eLife.79153)
Supplement: Figure 4—source data 4. [file elife-79153-fig4-data4.xlsx]

## Sheet: Lactate
Lactate															Average	Substract	Conc
S1	531.26	538.51	546.66		5% medium	886.02	974.57	900.52	900.79	976.99	879.14	886.99			915.003	376.193	227.595
S2	950.99	950.7	937.66		5% medium w/o BL	1218.9	1194.7	1154	1259.1	1189.9	1168	1214.4			1199.86	661.047	325.539
S3	1128.7	1228.2	1226.6		20% medium	853.69	854.26	813.54	838.56	859.99	845.95	835.9			843.127	304.317	202.882
S4	1785.3	1835.4	1780.2		20% medium w/o BL	1289.6	1149.5	1156.5	1159.5	1194.4	1128.1	1137.3			1173.56	634.747	316.496
S5	3227.4	3734.3	3094		FB	636.56	667.92	656.84	693.77	657.43					662.504	123.694	70.3881
S6	6856.2	6925.1	7069.7		5% BL	732.97	756.85	752.02	723.21	719.56					736.922	198.112	83.182
S7	11055	10468	11087		20% BL	769.74	790.17	829.76	780.52	766.34					787.306	248.496	91.844
S8	17450	17847	18152
uM	Intensity	Substract			substract	Tech Repli 1	Tech Repli 2	Tech Repli 3	Tech Repli 4	Tech Repli 5	Tech Repli 6	Tech Repli 7
0	538.81	0			5% medium	347.21	435.76	361.71	361.98	438.18	340.33	348.18
25	946.45	407.64			5% medium w/o BL	680.09	655.89	615.19	720.29	651.09	629.19	675.59
50	1194.5	655.69			20% medium	314.88	315.45	274.73	299.75	321.18	307.14	297.09
100	1800.3	1261.49			20% medium w/o BL	750.79	610.69	617.69	620.69	655.59	589.29	598.49
200	3351.9	2813.09			FB	97.75	129.11	118.03	154.96	118.62
400	6950.33	6411.52			5% BL	194.16	218.04	213.21	184.4	180.75
600	10870	10331.2			20% BL	230.93	251.36	290.95	241.71	227.53
1000	17816.3	17277.5
					Concentration (uM)	Tech Repli 1	Tech Repli 2	Tech Repli 3	Tech Repli 4	Tech Repli 5	Tech Repli 6	Tech Repli 7
					5% medium	217.63	248.077	222.615	222.708	248.909	215.264	217.963
					5% medium w/o BL	332.087	323.766	309.772	345.909	322.116	314.586	330.54
					20% medium	206.513	206.709	192.708	201.311	208.68	203.852	200.397
					20% medium w/o BL	356.397	308.225	310.632	311.663	323.663	300.866	304.03
					FB	65.9278	71.3192	69.4143	75.7633	69.5158
					5% BL	82.5026	86.608	85.7777	80.8246	80.1971
					20% BL	88.8241	92.3364	99.1427	90.6774	88.2395
					Average Conc
					5% medium	227.595
					5% medium w/o BL	325.539
					20% medium	202.882
					20% medium w/o BL	316.496
					FB	70.3881
					5% BL	83.182
					20% BL	91.844
