# Supplementary material for: Murine blastocysts generated by in vitro fertilization show increased Warburg metabolism and altered lactate production
Source: eLife. 2022 Sep 15;11:e79153. doi: 10.7554/eLife.79153 (PMC9519152; doi:10.7554/eLife.79153)
Supplement: Figure 5—source data 1. [file elife-79153-fig5-data1.xlsx]

## Sheet: log2fcImputed
Protein	Gene	ProteinName	EntrezID	ProteinRef	Comparison	log2FC	pvalue	adj.pvalue	imputed	iLog2FC	iPvalue	FB	P20	P5	CMA	Species
A2A432	Cul4b	cullin 4B	72584	A2A432	FB-P20	0.617583	0.272117	0.419837	no	0.617583	0.419837	3	3	3	FB	mouse
A2A432	Cul4b	cullin 4B	72584	A2A432	FB-P5	0.620524	0.270068	0.452105	no	0.620524	0.452105	3	3	3	FB	mouse
A2A432	Cul4b	cullin 4B	72584	A2A432	P5-P20	-0.0029416	0.995592	0.999687	no	-0.0029416	0.999687	3	3	3	P20	mouse
A2A4P0	Dhx8	DEAH (Asp-Glu-Ala-His) box polypeptide 8	217207	A2A4P0	FB-P20	-0.898092	0.56144	0.690725	no	-0.898092	0.690725	3	3	3	P20	mouse
A2A4P0	Dhx8	DEAH (Asp-Glu-Ala-His) box polypeptide 8	217207	A2A4P0	FB-P5	-0.329224	0.829246	0.899288	no	-0.329224	0.899288	3	3	3	P5	mouse
A2A4P0	Dhx8	DEAH (Asp-Glu-Ala-His) box polypeptide 8	217207	A2A4P0	P5-P20	-0.568868	0.710535	0.9478	no	-0.568868	0.9478	3	3	3	P20	mouse
A2A5R2	Arfgef2	ADP-ribosylation factor guanine nucleotide-exchange factor 2 (brefeldin A-inhibited)	99371	A2A5R2	P5-P20	-0.161074	0.76811	0.958335	no	-0.161074	0.958335	0	3	3	P20	mouse
Q62010	Ovgp1	oviductal glycoprotein 1	12659	Q62010	FB-P5	#NUM!		0	yes	17.9941	0.0121283	3	3	0	FB	mouse
P50404	Sftpd	surfactant associated protein D	20390	P50404	FB-P5	#NUM!		0	yes	17.8993	0.0339404	3	0	0	FB	mouse
A2A6M5	Calcoco2	calcium binding and coiled-coil domain 2	76815	A2A6M5	P5-P20	-0.125253	0.837402	0.97646	no	-0.125253	0.97646	3	3	3	P20	mouse
P02798	Mt2	metallothionein 2	17750	P02798	FB-P20	-9.14127	0.000361505	0.00781386	no	-9.14127	0.00781386	3	3	3	P20	mouse
P02798	Mt2	metallothionein 2	17750	P02798	FB-P5	-7.85957	0.000814186	0.0137741	no	-7.85957	0.0137741	3	3	3	P5	mouse
A2A6Q5	Cdc27	cell division cycle 27	217232	A2A6Q5	FB-P20	-2.1055	0.0509639	0.136243	no	-2.1055	0.136243	1	3	2	P20	mouse
A2A6Q5	Cdc27	cell division cycle 27	217232	A2A6Q5	FB-P5	0.284891	0.714068	0.823321	no	0.284891	0.823321	1	3	2	FB	mouse
A2A6Q5	Cdc27	cell division cycle 27	217232	A2A6Q5	P5-P20	-2.39039	0.0200729	0.409399	no	-2.39039	0.409399	1	3	2	P20	mouse
P58006	Sesn1	sestrin 1	140742	P58006	FB-P5	#NUM!		0	yes	17.491	0.0223056	3	0	0	FB	mouse
P50404	Sftpd	surfactant associated protein D	20390	P50404	FB-P20	#NUM!		0	yes	16.9208	0.0317982	3	0	0	FB	mouse
A2A791	Zmym4	zinc finger, MYM-type 4	67785	A2A791	P5-P20	0.368265	0.435718	0.831605	no	0.368265	0.831605	0	2	2	P5	mouse
A2A7Q9	A2A7Q9			A2A7Q9	P5-P20	0.374832	0.767048	0.958335	no	0.374832	0.958335	0	3	2	P5	mouse
P32261	Serpinc1	serine (or cysteine) peptidase inhibitor, clade C (antithrombin), member 1	11905	P32261	FB-P5	#NUM!		0	yes	16.912	0.0225074	3	2	0	FB	mouse
P58006	Sesn1	sestrin 1	140742	P58006	FB-P20	#NUM!		0	yes	16.5126	0.0153958	3	0	0	FB	mouse
A2A7S8	C77080	expressed sequence C77080	97130	A2A7S8	P5-P20	-1.01743	0.081112	0.581416	no	-1.01743	0.581416	0	3	3	P20	mouse
Q78DX7	Ros1	Ros1 proto-oncogene	19886	Q78DX7	FB-P5	#NUM!		0	yes	16.2138	0.0452311	3	1	0	FB	mouse
O09043	Napsa	napsin A aspartic peptidase	16541	O09043	FB-P5	#NUM!		0	yes	15.0764	0.0370682	3	0	0	FB	mouse
A2A8L5	Ptprf	protein tyrosine phosphatase, receptor type, F	19268	A2A8L5	P5-P20	-0.907148	0.378918	0.810691	no	-0.907148	0.810691	0	3	2	P20	mouse
O09043	Napsa	napsin A aspartic peptidase	16541	O09043	FB-P20	#NUM!		0	yes	14.098	0.0485971	3	0	0	FB	mouse
P08071	Ltf	lactotransferrin	17002	P08071	FB-P5	#NUM!		0	yes	13.8475	0.0475748	3	0	0	FB	mouse
P08905	Lyz2	lysozyme 2	17105	P08905	FB-P5	#NUM!		0	yes	13.6662	0.019106	3	0	0	FB	mouse
A2A8U2	Tmem201	transmembrane protein 201	230917	A2A8U2	P5-P20	1.42884	0.0117982	0.352122	no	1.42884	0.352122	0	2	2	P5	mouse
Q8C8T8	Tsr2	TSR2 20S rRNA accumulation	69499	Q8C8T8	FB-P5	#NUM!		0	yes	13.2708	0.0342699	3	1	0	FB	mouse
A2A8Z1	Osbpl9	oxysterol binding protein-like 9	100273	A2A8Z1	FB-P5	-0.760163	0.367475	0.545616	no	-0.760163	0.545616	3	3	3	P5	mouse
A2A8Z1	Osbpl9	oxysterol binding protein-like 9	100273	A2A8Z1	FB-P20	-0.430805	0.600737	0.723164	no	-0.430805	0.723164	3	3	3	P20	mouse
A2A8Z1	Osbpl9	oxysterol binding protein-like 9	100273	A2A8Z1	P5-P20	0.329359	0.687593	0.939228	no	0.329359	0.939228	3	3	3	P5	mouse
A2ADY9	Ddi2	DNA-damage inducible protein 2	68817	A2ADY9	FB-P5	-2.52552	0.0347147	0.122203	no	-2.52552	0.122203	3	3	3	P5	mouse
A2ADY9	Ddi2	DNA-damage inducible protein 2	68817	A2ADY9	P5-P20	1.28732	0.215158	0.718522	no	1.28732	0.718522	3	3	3	P5	mouse
A2ADY9	Ddi2	DNA-damage inducible protein 2	68817	A2ADY9	FB-P20	-1.23819	0.230981	0.379599	no	-1.23819	0.379599	3	3	3	P20	mouse
A2AGT5	Ckap5	cytoskeleton associated protein 5	75786	A2AGT5	FB-P20	0.904653	0.104186	0.219663	no	0.904653	0.219663	3	3	3	FB	mouse
A2AGT5	Ckap5	cytoskeleton associated protein 5	75786	A2AGT5	FB-P5	1.14217	0.052144	0.157174	no	1.14217	0.157174	3	3	3	FB	mouse
A2AGT5	Ckap5	cytoskeleton associated protein 5	75786	A2AGT5	P5-P20	-0.237521	0.633271	0.925985	no	-0.237521	0.925985	3	3	3	P20	mouse
A2AHC3	Camsap1	calmodulin regulated spectrin-associated protein 1	227634	A2AHC3	P5-P20	-0.201146	0.435535	0.831605	no	-0.201146	0.831605	0	2	2	P20	mouse
P37804	Tagln	transgelin	21345	P37804	FB-P5	#NUM!		0	yes	13.1043	0.0438255	3	0	0	FB	mouse
P11672	Lcn2	lipocalin 2	16819	P11672	FB-P5	#NUM!		0	yes	12.9908	0.0322344	3	0	0	FB	mouse
A2AI08	Tprn	taperin	97031	A2AI08	P5-P20	-0.887026	0.272675	0.741683	no	-0.887026	0.741683	1	3	3	P20	mouse
A2AI08	Tprn	taperin	97031	A2AI08	FB-P20	-4.39557	0.0112214	0.0505308	no	-4.39557	0.0505308	1	3	3	P20	mouse
A2AI08	Tprn	taperin	97031	A2AI08	FB-P5	-3.50854	0.0237064	0.0988111	no	-3.50854	0.0988111	1	3	3	P5	mouse
A2AIV2	Virma	vir like m6A methyltransferase associated	66185	A2AIV2	FB-P20	-1.50953	0.051587	0.136862	no	-1.50953	0.136862	3	3	3	P20	mouse
A2AIV2	Virma	vir like m6A methyltransferase associated	66185	A2AIV2	P5-P20	-0.459228	0.4887	0.862194	no	-0.459228	0.862194	3	3	3	P20	mouse
A2AIV2	Virma	vir like m6A methyltransferase associated	66185	A2AIV2	FB-P5	-1.05031	0.142669	0.299282	no	-1.05031	0.299282	3	3	3	P5	mouse
P01878	P01878			P01878	FB-P5	#NUM!		0	yes	12.9468	0.0295482	3	1	0	FB	mouse
A2AJT4	A2AJT4			A2AJT4	P5-P20	-2.85025	0.111968	0.623204	no	-2.85025	0.623204	0	3	1	P20	mouse
P70280	Vamp7	vesicle-associated membrane protein 7	20955	P70280	FB-P5	#NUM!		0	yes	12.9445	0.0301279	3	2	0	FB	mouse
P08071	Ltf	lactotransferrin	17002	P08071	FB-P20	#NUM!		0	yes	12.869	0.0247373	3	0	0	FB	mouse
Q9CRB5	Prl7c1	prolactin family 7, subfamily c, member 1	67505	Q9CRB5	FB-P5	#NUM!		0	yes	12.7125	0.0322967	3	0	0	FB	mouse
P08905	Lyz2	lysozyme 2	17105	P08905	FB-P20	#NUM!		0	yes	12.6877	0.0108207	3	0	0	FB	mouse
Q61133	Gstt2	glutathione S-transferase, theta 2	14872	Q61133	FB-P5	#NUM!		0	yes	12.6596	0.0302255	3	2	0	FB	mouse
A2AMZ4	Ndufaf8	NADH:ubiquinone oxidoreductase complex assembly factor 8	208501	A2AMZ4	P5-P20	-0.231113	0.879761	0.982129	no	-0.231113	0.982129	0	3	1	P20	mouse
Q62433	Ndrg1	N-myc downstream regulated gene 1	17988	Q62433	FB-P5	-6.04011	2.66866e-07	0.00024973	no	-6.04011	0.00024973	2	3	3	P5	mouse
A2AN08	Ubr4	ubiquitin protein ligase E3 component n-recognin 4	69116	A2AN08	P5-P20	0.132992	0.441626	0.836386	no	0.132992	0.836386	3	3	3	P5	mouse
Q62433	Ndrg1	N-myc downstream regulated gene 1	17988	Q62433	FB-P20	-6.84416	1.43107e-07	0.000191874	no	-6.84416	0.000191874	2	3	3	P20	mouse
A2APB8	Tpx2	TPX2, microtubule-associated	72119	A2APB8	FB-P20	-2.21197	0.0131115	0.055853	no	-2.21197	0.055853	2	3	3	P20	mouse
A2APB8	Tpx2	TPX2, microtubule-associated	72119	A2APB8	FB-P5	-1.74096	0.0314446	0.115794	no	-1.74096	0.115794	2	3	3	P5	mouse
A2APB8	Tpx2	TPX2, microtubule-associated	72119	A2APB8	P5-P20	-0.471008	0.411333	0.820911	no	-0.471008	0.820911	2	3	3	P20	mouse
O54804	Chka	choline kinase alpha	12660	O54804	FB-P5	#NUM!		0	yes	12.6307	0.0377211	3	2	0	FB	mouse
Q99J77	Nans	N-acetylneuraminic acid synthase (sialic acid synthase)	94181	Q99J77	FB-P5	#NUM!		0	yes	12.5071	0.0313253	3	0	0	FB	mouse
A2APV2	Fmnl2	formin-like 2	71409	A2APV2	P5-P20	-1.36683	0.0188605	0.401233	no	-1.36683	0.401233	0	3	3	P20	mouse
A2APY7	Ndufaf5	NADH:ubiquinone oxidoreductase complex assembly factor 5	69487	A2APY7	P5-P20	-1.58773	0.0139461	0.363104	no	-1.58773	0.363104	2	3	3	P20	mouse
A2APY7	Ndufaf5	NADH:ubiquinone oxidoreductase complex assembly factor 5	69487	A2APY7	FB-P20	-0.0274395	0.956563	0.97567	no	-0.0274395	0.97567	2	3	3	P20	mouse
A2APY7	Ndufaf5	NADH:ubiquinone oxidoreductase complex assembly factor 5	69487	A2APY7	FB-P5	1.56029	0.02256	0.0954155	no	1.56029	0.0954155	2	3	3	FB	mouse
A2AQ19	Rtf1	RTF1, Paf1/RNA polymerase II complex component	76246	A2AQ19	FB-P20	0.163707	0.76768	0.852568	no	0.163707	0.852568	2	3	3	FB	mouse
A2AQ19	Rtf1	RTF1, Paf1/RNA polymerase II complex component	76246	A2AQ19	FB-P5	-1.01882	0.109889	0.248644	no	-1.01882	0.248644	2	3	3	P5	mouse
A2AQ19	Rtf1	RTF1, Paf1/RNA polymerase II complex component	76246	A2AQ19	P5-P20	1.18253	0.0532279	0.52297	no	1.18253	0.52297	2	3	3	P5	mouse
P00329	Adh1	alcohol dehydrogenase 1 (class I)	11522	P00329	FB-P20	-6.23629	5.01734e-05	0.0022524	no	-6.23629	0.0022524	2	3	3	P20	mouse
A2AQ25	Etl4	enhancer trap locus 4	208618	A2AQ25	P5-P20	-1.62415	0.0108526	0.348173	no	-1.62415	0.348173	3	3	3	P20	mouse
A2AQ25	Etl4	enhancer trap locus 4	208618	A2AQ25	FB-P5	-1.5286	0.0140647	0.0697415	no	-1.5286	0.0697415	3	3	3	P5	mouse
P02469	Lamb1	laminin B1	16777	P02469	FB-P20	-6.22949	4.40343e-06	0.000705404	no	-6.22949	0.000705404	2	3	3	P20	mouse
A2AR02	Ppig	peptidyl-prolyl isomerase G (cyclophilin G)	228005	A2AR02	FB-P5	-3.979	0.00911496	0.0536086	no	-3.979	0.0536086	1	3	3	P5	mouse
A2AR02	Ppig	peptidyl-prolyl isomerase G (cyclophilin G)	228005	A2AR02	P5-P20	-1.35081	0.0857167	0.584517	no	-1.35081	0.584517	1	3	3	P20	mouse
A2ARV4	Lrp2	low density lipoprotein receptor-related protein 2	14725	A2ARV4	FB-P20	-0.26983	0.449625	0.591526	no	-0.26983	0.591526	3	3	3	P20	mouse
A2ARV4	Lrp2	low density lipoprotein receptor-related protein 2	14725	A2ARV4	FB-P5	0.0767647	0.825708	0.897821	no	0.0767647	0.897821	3	3	3	FB	mouse
A2ARV4	Lrp2	low density lipoprotein receptor-related protein 2	14725	A2ARV4	P5-P20	-0.346595	0.33902	0.780086	no	-0.346595	0.780086	3	3	3	P20	mouse
A2ASQ1	A2ASQ1			A2ASQ1	P5-P20	-1.62283	0.118082	0.629996	no	-1.62283	0.629996	0	3	3	P20	mouse
Q9D1Q4	Dpm3	dolichyl-phosphate mannosyltransferase polypeptide 3	68563	Q9D1Q4	FB-P5	#NUM!		0	yes	12.4113	0.0409525	3	3	0	FB	mouse
P62984	Uba52	ubiquitin A-52 residue ribosomal protein fusion product 1	22186	P62984	P5-P20	#NUM!		0	yes	12.3848	0.0357743	1	0	3	P5	mouse
A2AT37	Upf2	UPF2 regulator of nonsense transcripts homolog (yeast)	326622	A2AT37	FB-P5	2.03347	0.418841	0.595446	no	2.03347	0.595446	1	2	2	FB	mouse
A2AT37	Upf2	UPF2 regulator of nonsense transcripts homolog (yeast)	326622	A2AT37	P5-P20	-1.59796	0.433576	0.831605	no	-1.59796	0.831605	1	2	2	P20	mouse
A2AT37	Upf2	UPF2 regulator of nonsense transcripts homolog (yeast)	326622	A2AT37	FB-P20	0.435515	0.848809	0.913283	no	0.435515	0.913283	1	2	2	FB	mouse
A2AWL7	Mga	MAX gene associated	29808	A2AWL7	P5-P20	0.784979	0.458026	0.847554	no	0.784979	0.847554	0	3	3	P5	mouse
P37804	Tagln	transgelin	21345	P37804	FB-P20	#NUM!		0	yes	12.1258	0.0202786	3	0	0	FB	mouse
Q9D7Z6	Clca1	chloride channel accessory 1	23844	Q9D7Z6	FB-P5	#NUM!		0	yes	12.0633	0.0207739	3	0	0	FB	mouse
A2BDX3	Mocs3	molybdenum cofactor synthesis 3	69372	A2BDX3	FB-P5	-0.286053	0.730496	0.835683	no	-0.286053	0.835683	3	3	3	P5	mouse
A2BDX3	Mocs3	molybdenum cofactor synthesis 3	69372	A2BDX3	P5-P20	-1.45231	0.116563	0.629037	no	-1.45231	0.629037	3	3	3	P20	mouse
A2BDX3	Mocs3	molybdenum cofactor synthesis 3	69372	A2BDX3	FB-P20	-1.73836	0.0707242	0.168743	no	-1.73836	0.168743	3	3	3	P20	mouse
A2BE28	Las1l	LAS1-like (S. cerevisiae)	76130	A2BE28	FB-P5	-0.581264	0.439247	0.613538	no	-0.581264	0.613538	3	3	3	P5	mouse
A2BE28	Las1l	LAS1-like (S. cerevisiae)	76130	A2BE28	FB-P20	-1.34833	0.103102	0.217753	no	-1.34833	0.217753	3	3	3	P20	mouse
A2BE28	Las1l	LAS1-like (S. cerevisiae)	76130	A2BE28	P5-P20	-0.767064	0.316347	0.767647	no	-0.767064	0.767647	3	3	3	P20	mouse
A2BH40	Arid1a	AT rich interactive domain 1A (SWI-like)	93760	A2BH40	P5-P20	0.0587331	0.904858	0.985751	no	0.0587331	0.985751	2	3	3	P5	mouse
P26041	Msn	moesin	17698	P26041	FB-P20	-5.67179	9.1654e-06	0.000963451	no	-5.67179	0.000963451	3	3	3	P20	mouse
P00329	Adh1	alcohol dehydrogenase 1 (class I)	11522	P00329	FB-P5	-5.75345	7.42525e-05	0.0037465	no	-5.75345	0.0037465	2	3	3	P5	mouse
A2RSJ4	Uhrf1bp1l	UHRF1 (ICBP90) binding protein 1-like	75089	A2RSJ4	P5-P20	-2.1752	0.0519495	0.522267	no	-2.1752	0.522267	1	3	2	P20	mouse
A2RSJ4	Uhrf1bp1l	UHRF1 (ICBP90) binding protein 1-like	75089	A2RSJ4	FB-P20	-1.40408	0.208176	0.355239	no	-1.40408	0.355239	1	3	2	P20	mouse
A2RSJ4	Uhrf1bp1l	UHRF1 (ICBP90) binding protein 1-like	75089	A2RSJ4	FB-P5	0.77112	0.468483	0.636308	no	0.77112	0.636308	1	3	2	FB	mouse
A2RSY6	Trmt1l	tRNA methyltransferase 1 like	98685	A2RSY6	P5-P20	0.498642	0.0369614	0.486599	no	0.498642	0.486599	0	3	2	P5	mouse
P11672	Lcn2	lipocalin 2	16819	P11672	FB-P20	#NUM!		0	yes	12.0123	0.0213129	3	0	0	FB	mouse
P62488	Polr2g	polymerase (RNA) II (DNA directed) polypeptide G	67710	P62488	FB-P5	#NUM!		0	yes	11.9632	0.0259843	3	3	0	FB	mouse
A2RTL5	Rsrc2	arginine/serine-rich coiled-coil 2	208606	A2RTL5	P5-P20	-0.501116	0.571396	0.902658	no	-0.501116	0.902658	2	3	3	P20	mouse
A2RTL5	Rsrc2	arginine/serine-rich coiled-coil 2	208606	A2RTL5	FB-P20	-1.20288	0.250432	0.398669	no	-1.20288	0.398669	2	3	3	P20	mouse
A2RTL5	Rsrc2	arginine/serine-rich coiled-coil 2	208606	A2RTL5	FB-P5	-0.701767	0.482527	0.647558	no	-0.701767	0.647558	2	3	3	P5	mouse
P55096	Abcd3	ATP-binding cassette, sub-family D (ALD), member 3	19299	P55096	FB-P5	#NUM!		0	yes	11.9305	0.0413814	3	0	0	FB	mouse
A2TJV2	Palm3	paralemmin 3	74337	A2TJV2	P5-P20	-0.865774	0.0651155	0.543166	no	-0.865774	0.543166	0	3	3	P20	mouse
Q9D6U8	Fam162a	family with sequence similarity 162, member A	70186	Q9D6U8	FB-P5	#NUM!		0	yes	11.9303	0.029806	3	2	0	FB	mouse
A3KGV1	Odf2	outer dense fiber of sperm tails 2	18286	A3KGV1	FB-P20	-1.54298	0.100563	0.214505	no	-1.54298	0.214505	2	3	3	P20	mouse
A3KGV1	Odf2	outer dense fiber of sperm tails 2	18286	A3KGV1	P5-P20	-0.308162	0.672249	0.932664	no	-0.308162	0.932664	2	3	3	P20	mouse
A3KGV1	Odf2	outer dense fiber of sperm tails 2	18286	A3KGV1	FB-P5	-1.23482	0.168512	0.332104	no	-1.23482	0.332104	2	3	3	P5	mouse
Q8VEN2	Plet1	placenta expressed transcript 1	76509	Q8VEN2	FB-P5	#NUM!		0	yes	11.855	0.0441938	3	0	0	FB	mouse
A6H5Y3	Mtr	5-methyltetrahydrofolate-homocysteine methyltransferase	238505	A6H5Y3	FB-P20	0.148311	0.868871	0.924304	no	0.148311	0.924304	1	2	0	FB	mouse
A6H8H2	Dennd4c	DENN/MADD domain containing 4C	329877	A6H8H2	P5-P20	-1.03126	0.202915	0.707071	no	-1.03126	0.707071	0	3	3	P20	mouse
P49182	Serpind1	serine (or cysteine) peptidase inhibitor, clade D, member 1	15160	P49182	FB-P5	#NUM!		0	yes	11.7759	0.0127337	3	0	0	FB	mouse
O35904	Pik3cd	phosphatidylinositol-4,5-bisphosphate 3-kinase catalytic subunit delta	18707	O35904	FB-P5	#NUM!		0	yes	11.7661	0.0382269	3	2	0	FB	mouse
O88653	Lamtor3	late endosomal/lysosomal adaptor, MAPK and MTOR activator 3	56692	O88653	FB-P20	#NUM!		0	yes	11.7556	0.0470088	3	0	1	FB	mouse
Q9CRB5	Prl7c1	prolactin family 7, subfamily c, member 1	67505	Q9CRB5	FB-P20	#NUM!		0	yes	11.734	0.0214239	3	0	0	FB	mouse
A6PWY4	Wdr76	WD repeat domain 76	241627	A6PWY4	P5-P20	-0.691253	0.0264886	0.427141	no	-0.691253	0.427141	0	2	2	P20	mouse
B1AQJ2	Usp36	ubiquitin specific peptidase 36	72344	B1AQJ2	P5-P20	0.232366	0.844855	0.97646	no	0.232366	0.97646	0	2	3	P5	mouse
P61211	Arl1	ADP-ribosylation factor-like 1	104303	P61211	FB-P5	#NUM!		0	yes	11.7169	0.0119145	3	2	0	FB	mouse
P00520	Abl1	c-abl oncogene 1, non-receptor tyrosine kinase	11350	P00520	FB-P5	#NUM!		0	yes	11.6012	0.0478455	3	1	0	FB	mouse
P12658	Calb1	calbindin 1	12307	P12658	FB-P20	#NUM!		0	yes	11.5304	0.0495082	3	0	0	FB	mouse
B1AR13	Cisd3	CDGSH iron sulfur domain 3	217149	B1AR13	FB-P20	0.0795014	0.946193	0.972523	no	0.0795014	0.972523	1	3	0	FB	mouse
B1AXP6	Tomm5	translocase of outer mitochondrial membrane 5	68512	B1AXP6	FB-P20	0.719206	0.511322	0.646103	no	0.719206	0.646103	3	3	2	FB	mouse
B1AXP6	Tomm5	translocase of outer mitochondrial membrane 5	68512	B1AXP6	FB-P5	0.0886714	0.940906	0.968477	no	0.0886714	0.968477	3	3	2	FB	mouse
B1AXP6	Tomm5	translocase of outer mitochondrial membrane 5	68512	B1AXP6	P5-P20	0.630535	0.603345	0.916932	no	0.630535	0.916932	3	3	2	P5	mouse
P16045	Lgals1	lectin, galactose binding, soluble 1	16852	P16045	FB-P20	-5.43994	8.80054e-06	0.000963451	no	-5.43994	0.000963451	3	3	3	P20	mouse
B1AY13	Usp24	ubiquitin specific peptidase 24	329908	B1AY13	FB-P5	-0.928981	0.21508	0.394594	no	-0.928981	0.394594	1	3	3	P5	mouse
B1AY13	Usp24	ubiquitin specific peptidase 24	329908	B1AY13	P5-P20	-3.28496	0.00181592	0.224074	no	-3.28496	0.224074	1	3	3	P20	mouse
B1AZI6	Thoc2	THO complex 2	331401	B1AZI6	FB-P20	-2.23979	0.0960009	0.207966	no	-2.23979	0.207966	1	3	3	P20	mouse
B1AZI6	Thoc2	THO complex 2	331401	B1AZI6	FB-P5	-1.77165	0.161484	0.323418	no	-1.77165	0.323418	1	3	3	P5	mouse
B1AZI6	Thoc2	THO complex 2	331401	B1AZI6	P5-P20	-0.468134	0.556469	0.898093	no	-0.468134	0.898093	1	3	3	P20	mouse
B1AZP2	Dlgap4	DLG associated protein 4	228836	B1AZP2	FB-P5	-0.345771	0.518176	0.677684	no	-0.345771	0.677684	3	3	2	P5	mouse
B1AZP2	Dlgap4	DLG associated protein 4	228836	B1AZP2	P5-P20	-0.892876	0.132781	0.640341	no	-0.892876	0.640341	3	3	2	P20	mouse
B1AZP2	Dlgap4	DLG associated protein 4	228836	B1AZP2	FB-P20	-1.23865	0.0387882	0.113753	no	-1.23865	0.113753	3	3	2	P20	mouse
B2RPY5	Gpr161	G protein-coupled receptor 161	240888	B2RPY5	FB-P20	-0.314153	0.791834	0.870841	no	-0.314153	0.870841	2	2	3	P20	mouse
B2RPY5	Gpr161	G protein-coupled receptor 161	240888	B2RPY5	FB-P5	0.292009	0.788165	0.872957	no	0.292009	0.872957	2	2	3	FB	mouse
B2RPY5	Gpr161	G protein-coupled receptor 161	240888	B2RPY5	P5-P20	-0.606162	0.583053	0.908603	no	-0.606162	0.908603	2	2	3	P20	mouse
B2RQC6	Cad	carbamoyl-phosphate synthetase 2, aspartate transcarbamylase, and dihydroorotase	69719	B2RQC6	FB-P20	0.0336939	0.96382	0.979258	no	0.0336939	0.979258	3	3	3	FB	mouse
B2RQC6	Cad	carbamoyl-phosphate synthetase 2, aspartate transcarbamylase, and dihydroorotase	69719	B2RQC6	FB-P5	0.296774	0.691541	0.805073	no	0.296774	0.805073	3	3	3	FB	mouse
B2RQC6	Cad	carbamoyl-phosphate synthetase 2, aspartate transcarbamylase, and dihydroorotase	69719	B2RQC6	P5-P20	-0.26308	0.724655	0.951631	no	-0.26308	0.951631	3	3	3	P20	mouse
Q99J77	Nans	N-acetylneuraminic acid synthase (sialic acid synthase)	94181	Q99J77	FB-P20	#NUM!		0	yes	11.5286	0.0160277	3	0	0	FB	mouse
Q80Y75	Dnajb13	DnaJ heat shock protein family (Hsp40) member B13	69387	Q80Y75	FB-P5	#NUM!		0	yes	11.4322	0.0373348	3	0	0	FB	mouse
B2RRD7	Brpf1	bromodomain and PHD finger containing, 1	78783	B2RRD7	P5-P20	-2.76539	0.0103845	0.344171	no	-2.76539	0.344171	0	3	2	P20	mouse
Q9D7Z6	Clca1	chloride channel accessory 1	23844	Q9D7Z6	FB-P20	#NUM!		0	yes	11.0848	0.0352409	3	0	0	FB	mouse
B2RRE7	Otud4	OTU domain containing 4	73945	B2RRE7	P5-P20	-1.43526	0.503411	0.867531	no	-1.43526	0.867531	0	2	1	P20	mouse
P55096	Abcd3	ATP-binding cassette, sub-family D (ALD), member 3	19299	P55096	FB-P20	#NUM!		0	yes	10.952	0.0359776	3	0	0	FB	mouse
Q6PHU5	Sort1	sortilin 1	20661	Q6PHU5	FB-P5	#NUM!		0	yes	10.8892	0.0271567	3	0	0	FB	mouse
B2RXC1	Trappc11	trafficking protein particle complex 11	320714	B2RXC1	FB-P20	-1.0862	0.260814	0.408292	no	-1.0862	0.408292	2	3	3	P20	mouse
B2RXC1	Trappc11	trafficking protein particle complex 11	320714	B2RXC1	FB-P5	-1.38531	0.166914	0.330381	no	-1.38531	0.330381	2	3	3	P5	mouse
B2RXC1	Trappc11	trafficking protein particle complex 11	320714	B2RXC1	P5-P20	0.299111	0.712445	0.9478	no	0.299111	0.9478	2	3	3	P5	mouse
B2RXS4	Plxnb2	plexin B2	140570	B2RXS4	FB-P5	0.194427	0.822482	0.895134	no	0.194427	0.895134	3	3	3	FB	mouse
B2RXS4	Plxnb2	plexin B2	140570	B2RXS4	FB-P20	-1.41012	0.140059	0.269586	no	-1.41012	0.269586	3	3	3	P20	mouse
B2RXS4	Plxnb2	plexin B2	140570	B2RXS4	P5-P20	-1.60454	0.101242	0.610566	no	-1.60454	0.610566	3	3	3	P20	mouse
B2RY56	Rbm25	RNA binding motif protein 25	67039	B2RY56	P5-P20	0.0451424	0.928563	0.989186	no	0.0451424	0.989186	3	3	3	P5	mouse
B2RY56	Rbm25	RNA binding motif protein 25	67039	B2RY56	FB-P20	-1.38117	0.0287932	0.0928381	no	-1.38117	0.0928381	3	3	3	P20	mouse
B2RY56	Rbm25	RNA binding motif protein 25	67039	B2RY56	FB-P5	-1.42632	0.02549	0.103985	no	-1.42632	0.103985	3	3	3	P5	mouse
B9EJ57	Mterf1b	mitochondrial transcription termination factor 1b	208595	B9EJ57	FB-P20	-0.782217	0.602997	0.72485	no	-0.782217	0.72485	1	2	0	P20	mouse
Q8VEN2	Plet1	placenta expressed transcript 1	76509	Q8VEN2	FB-P20	#NUM!		0	yes	10.8765	0.0460228	3	0	0	FB	mouse
B9EJ86	Osbpl8	oxysterol binding protein-like 8	237542	B9EJ86	P5-P20	0.265466	0.78685	0.961734	no	0.265466	0.961734	3	3	3	P5	mouse
B9EJ86	Osbpl8	oxysterol binding protein-like 8	237542	B9EJ86	FB-P5	-2.26741	0.0521982	0.157174	no	-2.26741	0.157174	3	3	3	P5	mouse
B9EJ86	Osbpl8	oxysterol binding protein-like 8	237542	B9EJ86	FB-P20	-2.00195	0.0769442	0.179267	no	-2.00195	0.179267	3	3	3	P20	mouse
B9EJR8	Dnaaf5	dynein, axonemal assembly factor 5	433956	B9EJR8	FB-P20	0.491423	0.588359	0.711788	no	0.491423	0.711788	2	1	3	FB	mouse
B9EJR8	Dnaaf5	dynein, axonemal assembly factor 5	433956	B9EJR8	FB-P5	0.134535	0.838632	0.906368	no	0.134535	0.906368	2	1	3	FB	mouse
B9EJR8	Dnaaf5	dynein, axonemal assembly factor 5	433956	B9EJR8	P5-P20	0.356888	0.673356	0.932664	no	0.356888	0.932664	2	1	3	P5	mouse
C0HKD8	Mfap1a	microfibrillar-associated protein 1A	67532	C0HKD8	FB-P20	-1.38117	0.101238	0.215158	no	-1.38117	0.215158	2	3	3	P20	mouse
C0HKD8	Mfap1a	microfibrillar-associated protein 1A	67532	C0HKD8	FB-P5	-2.05197	0.0308219	0.115572	no	-2.05197	0.115572	2	3	3	P5	mouse
C0HKD8	Mfap1a	microfibrillar-associated protein 1A	67532	C0HKD8	P5-P20	0.670795	0.325863	0.776139	no	0.670795	0.776139	2	3	3	P5	mouse
C0HKE1	H2ac6	H2A clustered histone 6	319164	C0HKE1	P5-P20	-0.50134	0.721112	0.950952	no	-0.50134	0.950952	3	2	3	P20	mouse
C0HKE1	H2ac6	H2A clustered histone 6	319164	C0HKE1	FB-P20	2.0379	0.18524	0.327793	no	2.0379	0.327793	3	2	3	FB	mouse
C0HKE1	H2ac6	H2A clustered histone 6	319164	C0HKE1	FB-P5	2.53924	0.0854076	0.213037	no	2.53924	0.213037	3	2	3	FB	mouse
C0HKG5	Rnaset2b	ribonuclease T2B	68195	C0HKG5	FB-P20	1.60201	0.206372	0.353809	no	1.60201	0.353809	3	3	3	FB	mouse
C0HKG5	Rnaset2b	ribonuclease T2B	68195	C0HKG5	P5-P20	0.541711	0.648892	0.929012	no	0.541711	0.929012	3	3	3	P5	mouse
C0HKG5	Rnaset2b	ribonuclease T2B	68195	C0HKG5	FB-P5	1.0603	0.384655	0.563847	no	1.0603	0.563847	3	3	3	FB	mouse
P16045	Lgals1	lectin, galactose binding, soluble 1	16852	P16045	FB-P5	-5.55354	7.79933e-06	0.00112154	no	-5.55354	0.00112154	3	3	3	P5	mouse
D3YXK2	Safb	scaffold attachment factor B	224903	D3YXK2	FB-P20	-0.951436	0.00543327	0.0324883	no	-0.951436	0.0324883	3	3	3	P20	mouse
D3YXK2	Safb	scaffold attachment factor B	224903	D3YXK2	P5-P20	0.0693979	0.76752	0.958335	no	0.0693979	0.958335	3	3	3	P5	mouse
D3YZP9	Ccdc6	coiled-coil domain containing 6	76551	D3YZP9	FB-P20	0.143903	0.81327	0.886083	no	0.143903	0.886083	3	3	3	FB	mouse
D3YZP9	Ccdc6	coiled-coil domain containing 6	76551	D3YZP9	FB-P5	0.19062	0.754804	0.855148	no	0.19062	0.855148	3	3	3	FB	mouse
D3YZP9	Ccdc6	coiled-coil domain containing 6	76551	D3YZP9	P5-P20	-0.0467172	0.938739	0.989838	no	-0.0467172	0.989838	3	3	3	P20	mouse
D3Z6Q9	D3Z6Q9			D3Z6Q9	P5-P20	-0.0724055	0.909826	0.985949	no	-0.0724055	0.985949	3	3	3	P20	mouse
D3Z6Q9	D3Z6Q9			D3Z6Q9	FB-P5	-1.31792	0.0751008	0.196533	no	-1.31792	0.196533	3	3	3	P5	mouse
D3Z6Q9	D3Z6Q9			D3Z6Q9	FB-P20	-1.39032	0.0638274	0.158509	no	-1.39032	0.158509	3	3	3	P20	mouse
D3Z7P3	Gls	glutaminase	14660	D3Z7P3	FB-P5	-0.658896	0.469353	0.636726	no	-0.658896	0.636726	3	3	3	P5	mouse
D3Z7P3	Gls	glutaminase	14660	D3Z7P3	P5-P20	-0.0301921	0.972924	0.996	no	-0.0301921	0.996	3	3	3	P20	mouse
D3Z7P3	Gls	glutaminase	14660	D3Z7P3	FB-P20	-0.689088	0.450196	0.591744	no	-0.689088	0.591744	3	3	3	P20	mouse
P16406	Enpep	glutamyl aminopeptidase	13809	P16406	FB-P20	-5.39788	1.78039e-05	0.00133952	no	-5.39788	0.00133952	1	3	3	P20	mouse
E9PVA8	Gcn1	GCN1 activator of EIF2AK4	231659	E9PVA8	P5-P20	-1.01715	0.213811	0.718522	no	-1.01715	0.718522	3	3	3	P20	mouse
E9PVA8	Gcn1	GCN1 activator of EIF2AK4	231659	E9PVA8	FB-P5	-1.64501	0.0655723	0.181563	no	-1.64501	0.181563	3	3	3	P5	mouse
E9PVX6	Mki67	antigen identified by monoclonal antibody Ki 67	17345	E9PVX6	P5-P20	-0.526337	0.225104	0.721531	no	-0.526337	0.721531	3	3	3	P20	mouse
A2AR02	Ppig	peptidyl-prolyl isomerase G (cyclophilin G)	228005	A2AR02	FB-P20	-5.32981	0.00318136	0.0231441	no	-5.32981	0.0231441	1	3	3	P20	mouse
P02469	Lamb1	laminin B1	16777	P02469	FB-P5	-5.34238	9.4119e-06	0.00124989	no	-5.34238	0.00124989	2	3	3	P5	mouse
P50446	Krt6a	keratin 6A	16687	P50446	FB-P5	#NUM!		0	yes	10.8267	0.034084	2	1	0	FB	mouse
E9PYH6	Setd1a	SET domain containing 1A	233904	E9PYH6	P5-P20	0.685021	0.548324	0.892152	no	0.685021	0.892152	0	2	1	P5	mouse
P49182	Serpind1	serine (or cysteine) peptidase inhibitor, clade D, member 1	15160	P49182	FB-P20	#NUM!		0	yes	10.7974	0.0287267	3	0	0	FB	mouse
Q8K0E8	Fgb	fibrinogen beta chain	110135	Q8K0E8	FB-P5	#NUM!		0	yes	10.7603	0.0321584	3	0	0	FB	mouse
Q148V7	Relch	RAB11 binding and LisH domain, coiled-coil and HEAT repeat containing	227446	Q148V7	FB-P5	#NUM!		0	yes	10.4723	0.0478328	3	0	0	FB	mouse
P09925	Surf1	surfeit gene 1	20930	P09925	FB-P5	#NUM!		0	yes	10.4718	0.0342611	3	1	0	FB	mouse
E9PYK3	Parp4	poly (ADP-ribose) polymerase family, member 4	328417	E9PYK3	P5-P20	-0.751447	0.634438	0.925985	no	-0.751447	0.925985	0	3	2	P20	mouse
E9PZJ8	Ascc3	activating signal cointegrator 1 complex subunit 3	77987	E9PZJ8	P5-P20	0.126306	0.901703	0.985414	no	0.126306	0.985414	0	3	3	P5	mouse
Q80Y75	Dnajb13	DnaJ heat shock protein family (Hsp40) member B13	69387	Q80Y75	FB-P20	#NUM!		0	yes	10.4538	0.0280299	3	0	0	FB	mouse
Q8K409	Polb	polymerase (DNA directed), beta	18970	Q8K409	FB-P5	#NUM!		0	yes	10.1717	0.0390817	3	1	0	FB	mouse
Q99KU0	Vmp1	vacuole membrane protein 1	75909	Q99KU0	FB-P5	#NUM!		0	yes	10.0554	0.0236494	3	0	0	FB	mouse
Q9CXE7	Tmed5	transmembrane p24 trafficking protein 5	73130	Q9CXE7	P5-P20	#NUM!		0	yes	10.0448	0.044227	0	0	3	P5	mouse
E9Q2Z1	Cecr2	CECR2, histone acetyl-lysine reader	330409	E9Q2Z1	P5-P20	0.036009	0.96752	0.995566	no	0.036009	0.995566	0	3	3	P5	mouse
Q3UFB2	Znhit6	zinc finger, HIT type 6	229937	Q3UFB2	P5-P20	#NUM!		0	yes	9.9705	0.0327943	0	0	3	P5	mouse
Q91YH5	Atl3	atlastin GTPase 3	109168	Q91YH5	FB-P20	#NUM!		0	yes	9.95014	0.0246753	3	0	1	FB	mouse
E9Q3L2	Pi4ka	phosphatidylinositol 4-kinase alpha	224020	E9Q3L2	P5-P20	0.911066	0.0249606	0.425243	no	0.911066	0.425243	0	3	2	P5	mouse
E9Q3S4	Map3k19	mitogen-activated protein kinase kinase kinase 19	22625	E9Q3S4	P5-P20	0.841217	0.010276	0.343644	no	0.841217	0.343644	2	3	3	P5	mouse
E9Q3S4	Map3k19	mitogen-activated protein kinase kinase kinase 19	22625	E9Q3S4	FB-P20	-0.196358	0.441221	0.58354	no	-0.196358	0.58354	2	3	3	P20	mouse
P26041	Msn	moesin	17698	P26041	FB-P5	-4.97728	1.95932e-05	0.00176094	no	-4.97728	0.00176094	3	3	3	P5	mouse
Q6PHU5	Sort1	sortilin 1	20661	Q6PHU5	FB-P20	#NUM!		0	yes	9.91072	0.0263608	3	0	0	FB	mouse
E9Q4N7	Arid1b	AT rich interactive domain 1B (SWI-like)	239985	E9Q4N7	P5-P20	0.0734959	0.936271	0.989186	no	0.0734959	0.989186	0	3	3	P5	mouse
Q8BK30	Ndufv3	NADH:ubiquinone oxidoreductase core subunit V3	78330	Q8BK30	FB-P5	#NUM!		0	yes	9.82548	0.0429077	3	2	0	FB	mouse
E9Q4P1	Wdfy1	WD repeat and FYVE domain containing 1	69368	E9Q4P1	P5-P20	-2.22106	0.215192	0.718522	no	-2.22106	0.718522	0	2	1	P20	mouse
Q8K0E8	Fgb	fibrinogen beta chain	110135	Q8K0E8	FB-P20	#NUM!		0	yes	9.78181	0.0208144	3	0	0	FB	mouse
Q91V09	Wdr13	WD repeat domain 13	73447	Q91V09	FB-P5	#NUM!		0	yes	9.73973	0.0425878	3	0	0	FB	mouse
Q9D773	Mrpl2	mitochondrial ribosomal protein L2	27398	Q9D773	P5-P20	#NUM!		0	yes	9.66778	0.0456457	0	0	3	P5	mouse
E9Q555	E9Q555			E9Q555	P5-P20	1.2652	0.254455	0.734031	no	1.2652	0.734031	0	3	3	P5	mouse
E9Q557	Dsp	desmoplakin	109620	E9Q557	P5-P20	-1.33248	0.000803351	0.207564	no	-1.33248	0.207564	3	3	3	P20	mouse
P09602	Hmgn2	high mobility group nucleosomal binding domain 2	15331	P09602	FB-P5	-4.93198	0.0072414	0.0460758	no	-4.93198	0.0460758	3	2	2	P5	mouse
P24452	P24452			P24452	FB-P20	-5.04657	0.000421114	0.00797928	no	-5.04657	0.00797928	3	3	3	P20	mouse
E9Q5C9	Nolc1	nucleolar and coiled-body phosphoprotein 1	70769	E9Q5C9	FB-P5	-0.952802	0.0360618	0.125594	no	-0.952802	0.125594	3	3	3	P5	mouse
E9Q5C9	Nolc1	nucleolar and coiled-body phosphoprotein 1	70769	E9Q5C9	FB-P20	-1.21371	0.0140334	0.0587069	no	-1.21371	0.0587069	3	3	3	P20	mouse
E9Q5C9	Nolc1	nucleolar and coiled-body phosphoprotein 1	70769	E9Q5C9	P5-P20	-0.260913	0.489171	0.862529	no	-0.260913	0.862529	3	3	3	P20	mouse
Q99P30	Nudt7	nudix (nucleoside diphosphate linked moiety X)-type motif 7	67528	Q99P30	FB-P5	#NUM!		0	yes	9.62577	0.0427927	3	0	0	FB	mouse
E9Q5F9	Setd2	SET domain containing 2	235626	E9Q5F9	P5-P20	-0.0827712	0.949468	0.990855	no	-0.0827712	0.990855	0	3	3	P20	mouse
Q9D1G5	Q9D1G5			Q9D1G5	P5-P20	#NUM!		0	yes	9.55386	0.0154182	0	0	3	P5	mouse
E9Q5G3	Kif23	kinesin family member 23	71819	E9Q5G3	FB-P5	-0.945491	0.0882393	0.217178	no	-0.945491	0.217178	3	3	3	P5	mouse
E9Q5G3	Kif23	kinesin family member 23	71819	E9Q5G3	P5-P20	0.0621594	0.898022	0.984192	no	0.0621594	0.984192	3	3	3	P5	mouse
E9Q5G3	Kif23	kinesin family member 23	71819	E9Q5G3	FB-P20	-0.883332	0.106202	0.222309	no	-0.883332	0.222309	3	3	3	P20	mouse
E9Q5K9	Ythdc1	YTH domain containing 1	231386	E9Q5K9	FB-P5	-2.97191	0.0244593	0.100781	no	-2.97191	0.100781	3	3	3	P5	mouse
E9Q5K9	Ythdc1	YTH domain containing 1	231386	E9Q5K9	FB-P20	-2.71417	0.0343375	0.105138	no	-2.71417	0.105138	3	3	3	P20	mouse
E9Q5K9	Ythdc1	YTH domain containing 1	231386	E9Q5K9	P5-P20	0.257735	0.80435	0.970028	no	0.257735	0.970028	3	3	3	P5	mouse
Q9CQG2	Mettl16	methyltransferase like 16	67493	Q9CQG2	P5-P20	#NUM!		0	yes	9.53826	0.034183	0	0	3	P5	mouse
Q8BTT6	Utp25	UTP25 small subunit processome component	215193	Q8BTT6	P5-P20	#NUM!		0	yes	9.52932	0.0433365	1	0	3	P5	mouse
P24452	P24452			P24452	FB-P5	-4.80622	0.000548102	0.0105795	no	-4.80622	0.0105795	3	3	3	P5	mouse
Q62523	Zyx	zyxin	22793	Q62523	FB-P20	-5.02651	5.35514e-07	0.000260438	no	-5.02651	0.000260438	3	3	3	P20	mouse
E9Q6J5	Bod1l	biorientation of chromosomes in cell division 1-like	665775	E9Q6J5	P5-P20	-1.32374	0.00260218	0.227365	no	-1.32374	0.227365	3	3	3	P20	mouse
Q3U7U3	Fbxo7	F-box protein 7	69754	Q3U7U3	FB-P5	#NUM!		0	yes	9.50609	0.0474358	3	0	0	FB	mouse
E9Q6P5	Ttc7b	tetratricopeptide repeat domain 7B	104718	E9Q6P5	P5-P20	0.747663	0.387199	0.81571	no	0.747663	0.81571	0	3	3	P5	mouse
Q148V7	Relch	RAB11 binding and LisH domain, coiled-coil and HEAT repeat containing	227446	Q148V7	FB-P20	#NUM!		0	yes	9.49381	0.0211485	3	0	0	FB	mouse
E9Q784	Zc3h13	zinc finger CCCH type containing 13	67302	E9Q784	FB-P20	-2.50086	0.0147515	0.0600349	no	-2.50086	0.0600349	2	3	2	P20	mouse
E9Q784	Zc3h13	zinc finger CCCH type containing 13	67302	E9Q784	P5-P20	-0.813213	0.25251	0.733998	no	-0.813213	0.733998	2	3	2	P20	mouse
E9Q784	Zc3h13	zinc finger CCCH type containing 13	67302	E9Q784	FB-P5	-1.68764	0.0646036	0.181092	no	-1.68764	0.181092	2	3	2	P5	mouse
Q9QWL7	Krt17	keratin 17	16667	Q9QWL7	FB-P5	#NUM!		0	yes	9.4864	0.0120388	2	1	0	FB	mouse
Q8BWU5	Osgep	O-sialoglycoprotein endopeptidase	66246	Q8BWU5	P5-P20	#NUM!		0	yes	9.42	0.0228614	1	0	3	P5	mouse
E9Q7D5	Arhgef5	Rho guanine nucleotide exchange factor (GEF) 5	54324	E9Q7D5	P5-P20	-0.657384	0.462383	0.850662	no	-0.657384	0.850662	0	2	2	P20	mouse
E9Q7E2	Arid2	AT rich interactive domain 2 (ARID, RFX-like)	77044	E9Q7E2	P5-P20	-0.552052	0.275081	0.745136	no	-0.552052	0.745136	0	2	3	P20	mouse
Q9WVD4	Clcn5	chloride channel, voltage-sensitive 5	12728	Q9WVD4	FB-P5	#NUM!		0	yes	9.12318	0.0455348	3	2	0	FB	mouse
Q99KU0	Vmp1	vacuole membrane protein 1	75909	Q99KU0	FB-P20	#NUM!		0	yes	9.0769	0.0129771	3	0	0	FB	mouse
Q8R3G9	Tspan8	tetraspanin 8	216350	Q8R3G9	FB-P20	-4.98398	0.00188938	0.0171218	no	-4.98398	0.0171218	3	3	3	P20	mouse
E9Q7G0	Numa1	nuclear mitotic apparatus protein 1	101706	E9Q7G0	P5-P20	-1.17662	0.00526481	0.263929	no	-1.17662	0.263929	3	3	3	P20	mouse
Q08093	Cnn2	calponin 2	12798	Q08093	FB-P5	-4.80518	0.00185678	0.0214836	no	-4.80518	0.0214836	2	3	3	P5	mouse
E9Q8D0	Dnajc21	DnaJ heat shock protein family (Hsp40) member C21	78244	E9Q8D0	FB-P20	-0.642224	0.382854	0.528767	no	-0.642224	0.528767	3	3	3	P20	mouse
E9Q8D0	Dnajc21	DnaJ heat shock protein family (Hsp40) member C21	78244	E9Q8D0	FB-P5	0.162065	0.820131	0.893518	no	0.162065	0.893518	3	3	3	FB	mouse
E9Q8D0	Dnajc21	DnaJ heat shock protein family (Hsp40) member C21	78244	E9Q8D0	P5-P20	-0.804289	0.283056	0.753402	no	-0.804289	0.753402	3	3	3	P20	mouse
E9QAG8	Zfp932	zinc finger protein 932	69504	E9QAG8	FB-P5	-1.87097	0.301708	0.484484	no	-1.87097	0.484484	2	0	1	P5	mouse
Q6IFX2	Krt42	keratin 42	68239	Q6IFX2	FB-P20	#NUM!		0	yes	8.93311	0.046813	2	0	2	FB	mouse
E9QAT4	Sec16a	SEC16 homolog A, endoplasmic reticulum export factor	227648	E9QAT4	FB-P5	-0.456134	0.265763	0.446979	no	-0.456134	0.446979	2	3	3	P5	mouse
Q08093	Cnn2	calponin 2	12798	Q08093	FB-P20	-4.90476	0.00169365	0.0157391	no	-4.90476	0.0157391	2	3	3	P20	mouse
E9QAT4	Sec16a	SEC16 homolog A, endoplasmic reticulum export factor	227648	E9QAT4	P5-P20	-1.05483	0.0229883	0.412412	no	-1.05483	0.412412	2	3	3	P20	mouse
F6ZDS4	Tpr	translocated promoter region, nuclear basket protein	108989	F6ZDS4	P5-P20	-0.484159	0.0279133	0.436368	no	-0.484159	0.436368	3	3	3	P20	mouse
Q62523	Zyx	zyxin	22793	Q62523	FB-P5	-4.76612	7.34261e-07	0.000422347	no	-4.76612	0.000422347	3	3	3	P5	mouse
P58871	Tnks1bp1	tankyrase 1 binding protein 1	228140	P58871	FB-P20	-4.88868	0.00241376	0.0198253	no	-4.88868	0.0198253	3	3	3	P20	mouse
Q3TKY6	Cwc27	CWC27 spliceosome-associated protein	67285	Q3TKY6	P5-P20	#NUM!		0	yes	8.87007	0.0152613	0	0	3	P5	mouse
F8VPU2	Farp1	FERM, RhoGEF (Arhgef) and pleckstrin domain protein 1 (chondrocyte-derived)	223254	F8VPU2	P5-P20	-0.376774	0.791426	0.96339	no	-0.376774	0.96339	0	3	2	P20	mouse
Q8VED5	Krt79	keratin 79	223917	Q8VED5	FB-P5	#NUM!		0	yes	8.78534	0.0347272	2	2	0	FB	mouse
F8VQ03	Adam3	a disintegrin and metallopeptidase domain 3 (cyritestin)	11497	F8VQ03	P5-P20	-1.24066	0.405491	0.820098	no	-1.24066	0.820098	0	3	2	P20	mouse
Q91V09	Wdr13	WD repeat domain 13	73447	Q91V09	FB-P20	#NUM!		0	yes	8.76124	0.0176177	3	0	0	FB	mouse
Q99P30	Nudt7	nudix (nucleoside diphosphate linked moiety X)-type motif 7	67528	Q99P30	FB-P20	#NUM!		0	yes	8.64728	0.020354	3	0	0	FB	mouse
F8VQB6	Myo10	myosin X	17909	F8VQB6	FB-P20	-1.17311	0.237702	0.387711	no	-1.17311	0.387711	1	3	2	P20	mouse
F8VQB6	Myo10	myosin X	17909	F8VQB6	P5-P20	-1.58405	0.0867689	0.584517	no	-1.58405	0.584517	1	3	2	P20	mouse
F8VQB6	Myo10	myosin X	17909	F8VQB6	FB-P5	0.410943	0.660399	0.784139	no	0.410943	0.784139	1	3	2	FB	mouse
Q3U7U3	Fbxo7	F-box protein 7	69754	Q3U7U3	FB-P20	#NUM!		0	yes	8.5276	0.0277356	3	0	0	FB	mouse
G5E829	Atp2b1	ATPase, Ca++ transporting, plasma membrane 1	67972	G5E829	P5-P20	-0.710413	0.41095	0.820911	no	-0.710413	0.820911	0	3	1	P20	mouse
P56677	St14	suppression of tumorigenicity 14 (colon carcinoma)	19143	P56677	FB-P5	-4.64356	0.00100222	0.0155804	no	-4.64356	0.0155804	2	3	3	P5	mouse
G5E870	Trip12	thyroid hormone receptor interactor 12	14897	G5E870	P5-P20	-0.284273	0.556132	0.897952	no	-0.284273	0.897952	3	3	3	P20	mouse
P56677	St14	suppression of tumorigenicity 14 (colon carcinoma)	19143	P56677	FB-P20	-4.86679	0.00080735	0.0106774	no	-4.86679	0.0106774	2	3	3	P20	mouse
Q7TMW6	Ciao3	cytosolic iron-sulfur assembly component 3	67563	Q7TMW6	P5-P20	#NUM!		0	yes	8.13587	0.0148283	0	0	3	P5	mouse
G5E8B9	Zbtb11	zinc finger and BTB domain containing 11	271377	G5E8B9	P5-P20	-2.43084	0.0230429	0.412412	no	-2.43084	0.412412	0	2	2	P20	mouse
Q9DCT1	Akr1e1	aldo-keto reductase family 1, member E1	56043	Q9DCT1	P5-P20	#NUM!		0	yes	8.11655	0.027904	0	0	3	P5	mouse
L0N7N1	Kif14	kinesin family member 14	381293	L0N7N1	FB-P5	-0.513894	0.687598	0.802229	no	-0.513894	0.802229	1	3	3	P5	mouse
L0N7N1	Kif14	kinesin family member 14	381293	L0N7N1	P5-P20	0.584314	0.52495	0.875243	no	0.584314	0.875243	1	3	3	P5	mouse
L0N7N1	Kif14	kinesin family member 14	381293	L0N7N1	FB-P20	0.0704198	0.955571	0.975543	no	0.0704198	0.975543	1	3	3	FB	mouse
Q9CWS0	Ddah1	dimethylarginine dimethylaminohydrolase 1	69219	Q9CWS0	FB-P5	-4.41077	5.05753e-05	0.00296846	no	-4.41077	0.00296846	3	3	3	P5	mouse
Q7TNG5	Eml2	echinoderm microtubule associated protein like 2	72205	Q7TNG5	FB-P20	-4.86377	0.000408421	0.00789383	no	-4.86377	0.00789383	1	3	3	P20	mouse
O08528	Hk2	hexokinase 2	15277	O08528	P5-P20	0.111475	0.741057	0.955843	no	0.111475	0.955843	3	3	3	P5	mouse
O08529	Capn2	calpain 2	12334	O08529	FB-P5	-2.31095	0.0331723	0.119105	no	-2.31095	0.119105	1	3	3	P5	mouse
O08529	Capn2	calpain 2	12334	O08529	P5-P20	-0.0709472	0.896493	0.983177	no	-0.0709472	0.983177	1	3	3	P20	mouse
O08529	Capn2	calpain 2	12334	O08529	FB-P20	-2.38189	0.0302336	0.0959983	no	-2.38189	0.0959983	1	3	3	P20	mouse
O08539	Bin1	bridging integrator 1	30948	O08539	P5-P20	-0.768262	0.34105	0.780086	no	-0.768262	0.780086	0	1	2	P20	mouse
P53762	Arnt	aryl hydrocarbon receptor nuclear translocator	11863	P53762	P5-P20	#NUM!		0	yes	7.92004	0.03302	0	0	3	P5	mouse
O08547	Sec22b	SEC22 homolog B, vesicle trafficking protein	20333	O08547	P5-P20	-0.234671	0.814725	0.972431	no	-0.234671	0.972431	3	3	3	P20	mouse
O08547	Sec22b	SEC22 homolog B, vesicle trafficking protein	20333	O08547	FB-P20	-2.04007	0.0773543	0.179712	no	-2.04007	0.179712	3	3	3	P20	mouse
O08547	Sec22b	SEC22 homolog B, vesicle trafficking protein	20333	O08547	FB-P5	-1.8054	0.108584	0.247092	no	-1.8054	0.247092	3	3	3	P5	mouse
O08573	Lgals9	lectin, galactose binding, soluble 9	16859	O08573	FB-P20	1.60881	0.367272	0.514005	no	1.60881	0.514005	2	1	0	FB	mouse
P29391	P29391			P29391	FB-P5	#NUM!		0	yes	7.86302	0.0430458	2	3	0	FB	mouse
P16406	Enpep	glutamyl aminopeptidase	13809	P16406	FB-P5	-4.39786	4.0172e-05	0.00262579	no	-4.39786	0.00262579	1	3	3	P5	mouse
Q9QZQ8	Macroh2a1	macroH2A.1 histone	26914	Q9QZQ8	FB-P20	-4.80669	1.87206e-06	0.000568772	no	-4.80669	0.000568772	3	3	3	P20	mouse
O08579	Emd	emerin	13726	O08579	P5-P20	-0.750563	0.059742	0.538912	no	-0.750563	0.538912	3	3	3	P20	mouse
O08582	Gtpbp1	GTP binding protein 1	14904	O08582	P5-P20	-0.80776	0.258854	0.740268	no	-0.80776	0.740268	2	3	3	P20	mouse
O08582	Gtpbp1	GTP binding protein 1	14904	O08582	FB-P20	-0.671824	0.38698	0.531642	no	-0.671824	0.531642	2	3	3	P20	mouse
O08582	Gtpbp1	GTP binding protein 1	14904	O08582	FB-P5	0.135935	0.855536	0.916239	no	0.135935	0.916239	2	3	3	FB	mouse
O08583	Alyref	Aly/REF export factor	21681	O08583	P5-P20	-0.203986	0.267571	0.740446	no	-0.203986	0.740446	3	3	3	P20	mouse
Q9DCV7	Krt7	keratin 7	110310	Q9DCV7	FB-P5	-4.38761	0.00175168	0.0209038	no	-4.38761	0.0209038	1	3	3	P5	mouse
Q9ERG0	Lima1	LIM domain and actin binding 1	65970	Q9ERG0	FB-P20	-4.77444	4.80956e-06	0.000705404	no	-4.77444	0.000705404	2	3	3	P20	mouse
O08585	O08585			O08585	FB-P20	-0.909044	0.071843	0.170869	no	-0.909044	0.170869	3	3	3	P20	mouse
O08585	O08585			O08585	FB-P5	-0.848988	0.0876827	0.216516	no	-0.848988	0.216516	3	3	3	P5	mouse
O08585	O08585			O08585	P5-P20	-0.0600556	0.89009	0.982545	no	-0.0600556	0.982545	3	3	3	P20	mouse
Q99J83	Atg5	autophagy related 5	11793	Q99J83	FB-P20	#NUM!		0	yes	7.75389	0.0427353	2	0	1	FB	mouse
O08605	Mknk1	MAP kinase-interacting serine/threonine kinase 1	17346	O08605	P5-P20	-0.414478	0.604948	0.916932	no	-0.414478	0.916932	0	2	1	P20	mouse
O08638	O08638			O08638	FB-P20	0.807902	0.265195	0.412793	no	0.807902	0.412793	3	3	3	FB	mouse
O08638	O08638			O08638	FB-P5	1.81078	0.0331213	0.119105	no	1.81078	0.119105	3	3	3	FB	mouse
O08638	O08638			O08638	P5-P20	-1.00288	0.178053	0.687467	no	-1.00288	0.687467	3	3	3	P20	mouse
O08648	Map3k4	mitogen-activated protein kinase kinase kinase 4	26407	O08648	P5-P20	0.456094	0.574933	0.904684	no	0.456094	0.904684	0	3	2	P5	mouse
Q9JI46	Nudt3	nudix (nucleotide diphosphate linked moiety X)-type motif 3	56409	Q9JI46	FB-P20	#NUM!		0	yes	7.73691	0.0492102	2	0	1	FB	mouse
Q8VE38	Oxnad1	oxidoreductase NAD-binding domain containing 1	218885	Q8VE38	P5-P20	#NUM!		0	yes	7.70591	0.0472073	0	0	3	P5	mouse
O08663	Metap2	methionine aminopeptidase 2	56307	O08663	FB-P20	-0.600837	0.206135	0.353791	no	-0.600837	0.353791	3	3	3	P20	mouse
O08663	Metap2	methionine aminopeptidase 2	56307	O08663	FB-P5	-0.79354	0.110368	0.249151	no	-0.79354	0.249151	3	3	3	P5	mouse
O08663	Metap2	methionine aminopeptidase 2	56307	O08663	P5-P20	0.192703	0.665379	0.930686	no	0.192703	0.930686	3	3	3	P5	mouse
O08688	Capn5	calpain 5	12337	O08688	FB-P5	-1.64762	0.2086	0.388056	no	-1.64762	0.388056	1	3	3	P5	mouse
O08688	Capn5	calpain 5	12337	O08688	FB-P20	-1.88886	0.161146	0.297799	no	-1.88886	0.297799	1	3	3	P20	mouse
O08688	Capn5	calpain 5	12337	O08688	P5-P20	-0.241245	0.77197	0.958335	no	-0.241245	0.958335	1	3	3	P20	mouse
O08691	Arg2	arginase type II	11847	O08691	FB-P20	2.09613	0.087735	0.195577	no	2.09613	0.195577	3	3	3	FB	mouse
O08691	Arg2	arginase type II	11847	O08691	P5-P20	-0.433378	0.688228	0.939228	no	-0.433378	0.939228	3	3	3	P20	mouse
O08691	Arg2	arginase type II	11847	O08691	FB-P5	2.52951	0.0491941	0.152295	no	2.52951	0.152295	3	3	3	FB	mouse
O08709	Prdx6	peroxiredoxin 6	11758	O08709	P5-P20	0.0851857	0.873315	0.981316	no	0.0851857	0.981316	3	3	3	P5	mouse
O08709	Prdx6	peroxiredoxin 6	11758	O08709	FB-P20	0.536169	0.335312	0.482228	no	0.536169	0.482228	3	3	3	FB	mouse
O08709	Prdx6	peroxiredoxin 6	11758	O08709	FB-P5	0.450983	0.412267	0.591738	no	0.450983	0.591738	3	3	3	FB	mouse
O08715	Akap1	A kinase (PRKA) anchor protein 1	11640	O08715	P5-P20	-1.1332	0.00395487	0.238159	no	-1.1332	0.238159	3	3	3	P20	mouse
P97314	Csrp2	cysteine and glycine-rich protein 2	13008	P97314	FB-P20	-4.66185	0.00121776	0.0133921	no	-4.66185	0.0133921	2	3	3	P20	mouse
O08715	Akap1	A kinase (PRKA) anchor protein 1	11640	O08715	FB-P5	-0.62534	0.0463721	0.147196	no	-0.62534	0.147196	3	3	3	P5	mouse
O08914	Faah	fatty acid amide hydrolase	14073	O08914	FB-P5	#NUM!		0	yes	7.66347	0.0229267	2	0	0	FB	mouse
O08738	Casp6	caspase 6	12368	O08738	P5-P20	0.0644117	0.669731	0.932525	no	0.0644117	0.932525	0	1	2	P5	mouse
O08749	Dld	dihydrolipoamide dehydrogenase	13382	O08749	FB-P5	0.0299213	0.912555	0.952981	no	0.0299213	0.952981	3	3	3	FB	mouse
O08749	Dld	dihydrolipoamide dehydrogenase	13382	O08749	FB-P20	-0.0167024	0.951102	0.974769	no	-0.0167024	0.974769	3	3	3	P20	mouse
O08749	Dld	dihydrolipoamide dehydrogenase	13382	O08749	P5-P20	-0.0466237	0.864235	0.978601	no	-0.0466237	0.978601	3	3	3	P20	mouse
O08756	O08756			O08756	FB-P5	1.82546	0.011392	0.0621465	no	1.82546	0.0621465	3	3	3	FB	mouse
O08756	O08756			O08756	FB-P20	1.36465	0.0360601	0.108255	no	1.36465	0.108255	3	3	3	FB	mouse
O08756	O08756			O08756	P5-P20	-0.460806	0.398738	0.81747	no	-0.460806	0.81747	3	3	3	P20	mouse
O08759	Ube3a	ubiquitin protein ligase E3A	22215	O08759	P5-P20	-1.62282	0.316738	0.767647	no	-1.62282	0.767647	0	1	3	P20	mouse
Q6IFX2	Krt42	keratin 42	68239	Q6IFX2	P5-P20	#NUM!		0	yes	7.60748	0.0358707	2	0	2	P5	mouse
Q3UZ39	Lrrfip1	leucine rich repeat (in FLII) interacting protein 1	16978	Q3UZ39	FB-P5	-4.32969	0.000913405	0.0146298	no	-4.32969	0.0146298	2	3	3	P5	mouse
O08784	Tcof1	treacle ribosome biogenesis factor 1	21453	O08784	P5-P20	0.0681818	0.840109	0.97646	no	0.0681818	0.97646	3	3	3	P5	mouse
Q9DCV7	Krt7	keratin 7	110310	Q9DCV7	FB-P20	-4.62211	0.00143838	0.0145232	no	-4.62211	0.0145232	1	3	3	P20	mouse
O08788	Dctn1	dynactin 1	13191	O08788	P5-P20	-0.101815	0.857556	0.978601	no	-0.101815	0.978601	2	3	3	P20	mouse
O08788	Dctn1	dynactin 1	13191	O08788	FB-P20	-1.09203	0.129615	0.255857	no	-1.09203	0.255857	2	3	3	P20	mouse
O08788	Dctn1	dynactin 1	13191	O08788	FB-P5	-0.990218	0.161154	0.323179	no	-0.990218	0.323179	2	3	3	P5	mouse
Q80TP3	Ubr5	ubiquitin protein ligase E3 component n-recognin 5	70790	Q80TP3	FB-P20	-4.54017	2.01906e-05	0.00135279	no	-4.54017	0.00135279	3	3	3	P20	mouse
Q91YD9	Wasl	WASP like actin nucleation promoting factor	73178	Q91YD9	FB-P5	-4.28655	0.00178596	0.0210687	no	-4.28655	0.0210687	2	3	3	P5	mouse
O08795	Prkcsh	protein kinase C substrate 80K-H	19089	O08795	P5-P20	-0.0212405	0.953282	0.990855	no	-0.0212405	0.990855	3	3	3	P20	mouse
O08796	Eef2k	eukaryotic elongation factor-2 kinase	13631	O08796	FB-P20	1.60407	0.24436	0.393542	no	1.60407	0.393542	2	1	1	FB	mouse
O08796	Eef2k	eukaryotic elongation factor-2 kinase	13631	O08796	FB-P5	1.70818	0.230774	0.410312	no	1.70818	0.410312	2	1	1	FB	mouse
O08807	Prdx4	peroxiredoxin 4	53381	O08807	P5-P20	-1.51788	0.128879	0.638219	no	-1.51788	0.638219	1	3	3	P20	mouse
O08807	Prdx4	peroxiredoxin 4	53381	O08807	FB-P5	-0.15224	0.89884	0.944302	no	-0.15224	0.944302	1	3	3	P5	mouse
O08807	Prdx4	peroxiredoxin 4	53381	O08807	FB-P20	-1.67012	0.211636	0.359462	no	-1.67012	0.359462	1	3	3	P20	mouse
O08808	Diaph1	diaphanous related formin 1	13367	O08808	FB-P20	0.868713	0.0347739	0.105478	no	0.868713	0.105478	3	3	3	FB	mouse
O08808	Diaph1	diaphanous related formin 1	13367	O08808	P5-P20	-0.033006	0.92114	0.989186	no	-0.033006	0.989186	3	3	3	P20	mouse
O08808	Diaph1	diaphanous related formin 1	13367	O08808	FB-P5	0.901719	0.0303385	0.114581	no	0.901719	0.114581	3	3	3	FB	mouse
O08810	Eftud2	elongation factor Tu GTP binding domain containing 2	20624	O08810	FB-P5	-0.336877	0.107964	0.246823	no	-0.336877	0.246823	3	3	3	P5	mouse
O08810	Eftud2	elongation factor Tu GTP binding domain containing 2	20624	O08810	P5-P20	-0.0634123	0.734469	0.954604	no	-0.0634123	0.954604	3	3	3	P20	mouse
O08810	Eftud2	elongation factor Tu GTP binding domain containing 2	20624	O08810	FB-P20	-0.400289	0.0660477	0.161649	no	-0.400289	0.161649	3	3	3	P20	mouse
O08856	Ell	elongation factor RNA polymerase II	13716	O08856	FB-P5	-1.67475	0.204523	0.382699	no	-1.67475	0.382699	2	3	3	P5	mouse
O08856	Ell	elongation factor RNA polymerase II	13716	O08856	P5-P20	0.106265	0.921617	0.989186	no	0.106265	0.989186	2	3	3	P5	mouse
O08856	Ell	elongation factor RNA polymerase II	13716	O08856	FB-P20	-1.56849	0.2302	0.379579	no	-1.56849	0.379579	2	3	3	P20	mouse
Q9CX66	Nopchap1	NOP protein chaperone 1	28109	Q9CX66	FB-P5	#NUM!		0	yes	7.60426	0.0459355	2	1	0	FB	mouse
P0DN89	Tmem254a	transmembrane protein 254a	66039	P0DN89	FB-P5	#NUM!		0	yes	7.57977	0.0115657	2	1	0	FB	mouse
O08912	Galnt1	polypeptide N-acetylgalactosaminyltransferase 1	14423	O08912	P5-P20	-0.919446	0.254045	0.734031	no	-0.919446	0.734031	0	2	3	P20	mouse
Q8CDI2	Q8CDI2			Q8CDI2	P5-P20	#NUM!		0	yes	7.41807	0.0465595	0	0	3	P5	mouse
Q7TNG8	Ldhd	lactate dehydrogenase D	52815	Q7TNG8	FB-P20	#NUM!		0	yes	7.29213	0.0107747	2	0	1	FB	mouse
O08915	Aip	aryl-hydrocarbon receptor-interacting protein	11632	O08915	P5-P20	-1.00411	0.0615855	0.538912	no	-1.00411	0.538912	1	2	3	P20	mouse
O08915	Aip	aryl-hydrocarbon receptor-interacting protein	11632	O08915	FB-P5	2.31348	0.013005	0.0665603	no	2.31348	0.0665603	1	2	3	FB	mouse
O08915	Aip	aryl-hydrocarbon receptor-interacting protein	11632	O08915	FB-P20	1.30936	0.0658445	0.161593	no	1.30936	0.161593	1	2	3	FB	mouse
O08917	Flot1	flotillin 1	14251	O08917	P5-P20	-0.236717	0.896566	0.983177	no	-0.236717	0.983177	1	3	1	P20	mouse
O08917	Flot1	flotillin 1	14251	O08917	FB-P20	-0.898746	0.632761	0.748135	no	-0.898746	0.748135	1	3	1	P20	mouse
O08970	Tuft1	tuftelin 1	22156	O08970	FB-P5	-1.55029	0.214038	0.393841	no	-1.55029	0.393841	1	3	3	P5	mouse
O08970	Tuft1	tuftelin 1	22156	O08970	FB-P20	-2.21481	0.10268	0.217396	no	-2.21481	0.217396	1	3	3	P20	mouse
O08970	Tuft1	tuftelin 1	22156	O08970	P5-P20	-0.664518	0.421564	0.826213	no	-0.664518	0.826213	1	3	3	P20	mouse
O08989	Mras	muscle and microspikes RAS	17532	O08989	FB-P20	-0.835855	0.399145	0.542971	no	-0.835855	0.542971	2	2	3	P20	mouse
O08989	Mras	muscle and microspikes RAS	17532	O08989	FB-P5	0.28051	0.746346	0.847698	no	0.28051	0.847698	2	2	3	FB	mouse
O08989	Mras	muscle and microspikes RAS	17532	O08989	P5-P20	-1.11636	0.239857	0.724864	no	-1.11636	0.724864	2	2	3	P20	mouse
O08997	Atox1	antioxidant 1 copper chaperone	11927	O08997	FB-P20	0.78534	0.166486	0.304563	no	0.78534	0.304563	3	3	3	FB	mouse
O08997	Atox1	antioxidant 1 copper chaperone	11927	O08997	FB-P5	-0.677704	0.223151	0.402824	no	-0.677704	0.402824	3	3	3	P5	mouse
O08997	Atox1	antioxidant 1 copper chaperone	11927	O08997	P5-P20	1.46304	0.026191	0.427141	no	1.46304	0.427141	3	3	3	P5	mouse
O09000	O09000			O09000	P5-P20	-0.400754	0.403155	0.819802	no	-0.400754	0.819802	1	3	3	P20	mouse
O09000	O09000			O09000	FB-P20	-2.27542	0.0199457	0.0718538	no	-2.27542	0.0718538	1	3	3	P20	mouse
O09000	O09000			O09000	FB-P5	-1.87467	0.0365884	0.126781	no	-1.87467	0.126781	1	3	3	P5	mouse
O09035	Dbil5	diazepam binding inhibitor-like 5	13168	O09035	P5-P20	-0.188424	0.796206	0.965113	no	-0.188424	0.965113	0	2	3	P20	mouse
Q91WG4	Elp2	elongator acetyltransferase complex subunit 2	58523	Q91WG4	FB-P5	#NUM!		0	yes	7.27913	0.0152249	2	2	0	FB	mouse
Q8CBE3	Wdr37	WD repeat domain 37	207615	Q8CBE3	FB-P5	#NUM!		0	yes	7.26697	0.0229216	2	2	0	FB	mouse
O70333	Cript	cysteine-rich PDZ-binding protein	56724	O70333	FB-P5	#NUM!		0	yes	7.15783	0.0203527	2	2	0	FB	mouse
Q8VDP2	C330007P06Rik	RIKEN cDNA C330007P06 gene	77644	Q8VDP2	FB-P5	#NUM!		0	yes	6.99181	0.0404049	2	1	0	FB	mouse
O09044	Snap23	synaptosomal-associated protein 23	20619	O09044	FB-P5	-0.769222	0.298285	0.480597	no	-0.769222	0.480597	2	3	3	P5	mouse
O09044	Snap23	synaptosomal-associated protein 23	20619	O09044	P5-P20	-0.542211	0.402415	0.81895	no	-0.542211	0.81895	2	3	3	P20	mouse
O09044	Snap23	synaptosomal-associated protein 23	20619	O09044	FB-P20	-1.31143	0.104805	0.22065	no	-1.31143	0.22065	2	3	3	P20	mouse
O09061	Psmb1	proteasome (prosome, macropain) subunit, beta type 1	19170	O09061	P5-P20	-0.145773	0.838029	0.97646	no	-0.145773	0.97646	3	3	3	P20	mouse
O09061	Psmb1	proteasome (prosome, macropain) subunit, beta type 1	19170	O09061	FB-P20	0.652272	0.376367	0.52322	no	0.652272	0.52322	3	3	3	FB	mouse
O09061	Psmb1	proteasome (prosome, macropain) subunit, beta type 1	19170	O09061	FB-P5	0.798044	0.286869	0.467972	no	0.798044	0.467972	3	3	3	FB	mouse
O09106	Hdac1	histone deacetylase 1	433759	O09106	FB-P5	-0.694918	0.394025	0.57291	no	-0.694918	0.57291	3	3	3	P5	mouse
O09106	Hdac1	histone deacetylase 1	433759	O09106	P5-P20	-0.891786	0.283374	0.753402	no	-0.891786	0.753402	3	3	3	P20	mouse
O09106	Hdac1	histone deacetylase 1	433759	O09106	FB-P20	-1.5867	0.0809172	0.185335	no	-1.5867	0.185335	3	3	3	P20	mouse
O09110	Map2k3	mitogen-activated protein kinase kinase 3	26397	O09110	FB-P5	2.12964	0.0859088	0.213622	no	2.12964	0.213622	2	2	1	FB	mouse
O09110	Map2k3	mitogen-activated protein kinase kinase 3	26397	O09110	FB-P20	1.08626	0.184666	0.327509	no	1.08626	0.327509	2	2	1	FB	mouse
O09110	Map2k3	mitogen-activated protein kinase kinase 3	26397	O09110	P5-P20	-1.04338	0.258727	0.740268	no	-1.04338	0.740268	2	2	1	P20	mouse
O09111	Ndufb11	NADH:ubiquinone oxidoreductase subunit B11	104130	O09111	FB-P5	-0.267396	0.566198	0.713579	no	-0.267396	0.713579	3	3	3	P5	mouse
O09111	Ndufb11	NADH:ubiquinone oxidoreductase subunit B11	104130	O09111	FB-P20	-0.129994	0.777926	0.860776	no	-0.129994	0.860776	3	3	3	P20	mouse
O09111	Ndufb11	NADH:ubiquinone oxidoreductase subunit B11	104130	O09111	P5-P20	0.137402	0.765726	0.958335	no	0.137402	0.958335	3	3	3	P5	mouse
O09117	Sypl	synaptophysin-like protein	19027	O09117	FB-P20	-0.151799	0.772172	0.856078	no	-0.151799	0.856078	3	3	3	P20	mouse
O09117	Sypl	synaptophysin-like protein	19027	O09117	FB-P5	-1.04715	0.0816342	0.207037	no	-1.04715	0.207037	3	3	3	P5	mouse
O09117	Sypl	synaptophysin-like protein	19027	O09117	P5-P20	0.895348	0.12421	0.635694	no	0.895348	0.635694	3	3	3	P5	mouse
O09130	Nfatc2ip	nuclear factor of activated T cells, cytoplasmic, calcineurin dependent 2 interacting protein	18020	O09130	P5-P20	-1.55667	0.139653	0.646284	no	-1.55667	0.646284	3	3	3	P20	mouse
O09130	Nfatc2ip	nuclear factor of activated T cells, cytoplasmic, calcineurin dependent 2 interacting protein	18020	O09130	FB-P20	-3.28576	0.011469	0.0513292	no	-3.28576	0.0513292	3	3	3	P20	mouse
O09130	Nfatc2ip	nuclear factor of activated T cells, cytoplasmic, calcineurin dependent 2 interacting protein	18020	O09130	FB-P5	-1.72909	0.107574	0.246672	no	-1.72909	0.246672	3	3	3	P5	mouse
O09131	Gsto1	glutathione S-transferase omega 1	14873	O09131	FB-P5	-0.60581	0.152481	0.312041	no	-0.60581	0.312041	3	3	3	P5	mouse
O09131	Gsto1	glutathione S-transferase omega 1	14873	O09131	P5-P20	0.120164	0.756249	0.958335	no	0.120164	0.958335	3	3	3	P5	mouse
O09131	Gsto1	glutathione S-transferase omega 1	14873	O09131	FB-P20	-0.485647	0.237065	0.387104	no	-0.485647	0.387104	3	3	3	P20	mouse
O09167	O09167			O09167	P5-P20	-0.172473	0.759698	0.958335	no	-0.172473	0.958335	3	3	3	P20	mouse
Q8BHG9	Cggbp1	CGG triplet repeat binding protein 1	106143	Q8BHG9	FB-P20	-4.50569	0.00125117	0.0135087	no	-4.50569	0.0135087	1	3	3	P20	mouse
Q9D1Q6	Erp44	endoplasmic reticulum protein 44	76299	Q9D1Q6	FB-P5	-4.22142	0.000176235	0.00586111	no	-4.22142	0.00586111	3	3	3	P5	mouse
O09172	Gclm	glutamate-cysteine ligase, modifier subunit	14630	O09172	P5-P20	1.43569	0.31047	0.765633	no	1.43569	0.765633	3	3	3	P5	mouse
O09172	Gclm	glutamate-cysteine ligase, modifier subunit	14630	O09172	FB-P5	-0.245082	0.856274	0.916239	no	-0.245082	0.916239	3	3	3	P5	mouse
O09172	Gclm	glutamate-cysteine ligase, modifier subunit	14630	O09172	FB-P20	1.19061	0.39379	0.537958	no	1.19061	0.537958	3	3	3	FB	mouse
O35114	Scarb2	scavenger receptor class B, member 2	12492	O35114	P5-P20	1.59964	0.00957261	0.329637	no	1.59964	0.329637	1	3	3	P5	mouse
O35114	Scarb2	scavenger receptor class B, member 2	12492	O35114	FB-P20	-0.496575	0.363963	0.510598	no	-0.496575	0.510598	1	3	3	P20	mouse
O35114	Scarb2	scavenger receptor class B, member 2	12492	O35114	FB-P5	-2.09622	0.0124453	0.0654345	no	-2.09622	0.0654345	1	3	3	P5	mouse
O35126	Atn1	atrophin 1	13498	O35126	FB-P20	-2.07731	0.0436519	0.123907	no	-2.07731	0.123907	1	3	3	P20	mouse
O35126	Atn1	atrophin 1	13498	O35126	P5-P20	-1.56634	0.036091	0.486009	no	-1.56634	0.486009	1	3	3	P20	mouse
O35126	Atn1	atrophin 1	13498	O35126	FB-P5	-0.510973	0.513598	0.673863	no	-0.510973	0.673863	1	3	3	P5	mouse
O35129	Phb2	prohibitin 2	12034	O35129	P5-P20	0.0521516	0.820198	0.974268	no	0.0521516	0.974268	3	3	3	P5	mouse
O35129	Phb2	prohibitin 2	12034	O35129	FB-P5	0.509011	0.0596366	0.17255	no	0.509011	0.17255	3	3	3	FB	mouse
O35129	Phb2	prohibitin 2	12034	O35129	FB-P20	0.561163	0.0431892	0.123072	no	0.561163	0.123072	3	3	3	FB	mouse
O35130	Emg1	EMG1 N1-specific pseudouridine methyltransferase	14791	O35130	P5-P20	0.844314	0.61461	0.919549	no	0.844314	0.919549	2	3	2	P5	mouse
O35130	Emg1	EMG1 N1-specific pseudouridine methyltransferase	14791	O35130	FB-P20	-0.913486	0.587008	0.711629	no	-0.913486	0.711629	2	3	2	P20	mouse
O35130	Emg1	EMG1 N1-specific pseudouridine methyltransferase	14791	O35130	FB-P5	-1.7578	0.358675	0.537825	no	-1.7578	0.537825	2	3	2	P5	mouse
O35134	Polr1a	polymerase (RNA) I polypeptide A	20019	O35134	FB-P5	-0.633216	0.0220205	0.0942616	no	-0.633216	0.0942616	3	3	3	P5	mouse
Q9D1Q6	Erp44	endoplasmic reticulum protein 44	76299	Q9D1Q6	FB-P20	-4.44806	0.000131562	0.00449066	no	-4.44806	0.00449066	3	3	3	P20	mouse
O35134	Polr1a	polymerase (RNA) I polypeptide A	20019	O35134	P5-P20	-0.523835	0.0442366	0.505887	no	-0.523835	0.505887	3	3	3	P20	mouse
O35143	Atpif1	ATPase inhibitory factor 1	11983	O35143	P5-P20	-0.443805	0.572824	0.902746	no	-0.443805	0.902746	3	3	3	P20	mouse
O35143	Atpif1	ATPase inhibitory factor 1	11983	O35143	FB-P20	-0.100502	0.897016	0.943241	no	-0.100502	0.943241	3	3	3	P20	mouse
O35143	Atpif1	ATPase inhibitory factor 1	11983	O35143	FB-P5	0.343304	0.660903	0.784139	no	0.343304	0.784139	3	3	3	FB	mouse
Q9WUA3	Pfkp	phosphofructokinase, platelet	56421	Q9WUA3	P5-P20	#NUM!		0	yes	6.96077	0.0334563	1	0	2	P5	mouse
Q922H2	Pdk3	pyruvate dehydrogenase kinase, isoenzyme 3	236900	Q922H2	FB-P5	#NUM!		0	yes	6.89856	0.0401364	2	2	0	FB	mouse
O35144	Terf2	telomeric repeat binding factor 2	21750	O35144	P5-P20	-0.491509	0.38032	0.810691	no	-0.491509	0.810691	0	3	3	P20	mouse
O35166	Gosr2	golgi SNAP receptor complex member 2	56494	O35166	FB-P5	1.70398	0.135354	0.288141	no	1.70398	0.288141	2	1	1	FB	mouse
O35166	Gosr2	golgi SNAP receptor complex member 2	56494	O35166	FB-P20	-0.0450311	0.922452	0.957225	no	-0.0450311	0.957225	2	1	1	P20	mouse
Q8K339	Kin	Kin17 DNA and RNA binding protein	16588	Q8K339	P5-P20	#NUM!		0	yes	6.87493	0.0237493	2	0	2	P5	mouse
O35207	Cdk2ap1	CDK2 (cyclin-dependent kinase 2)-associated protein 1	13445	O35207	P5-P20	-0.354267	0.845233	0.97646	no	-0.354267	0.97646	0	2	1	P20	mouse
O35216	Cenpa	centromere protein A	12615	O35216	P5-P20	0.258222	0.7245	0.951631	no	0.258222	0.951631	1	3	3	P5	mouse
O35216	Cenpa	centromere protein A	12615	O35216	FB-P5	-0.236083	0.818876	0.893093	no	-0.236083	0.893093	1	3	3	P5	mouse
O35216	Cenpa	centromere protein A	12615	O35216	FB-P20	0.0221387	0.982806	0.989589	no	0.0221387	0.989589	1	3	3	FB	mouse
O35218	Cpsf2	cleavage and polyadenylation specific factor 2	51786	O35218	P5-P20	-1.18773	0.0668406	0.552589	no	-1.18773	0.552589	2	3	3	P20	mouse
O35218	Cpsf2	cleavage and polyadenylation specific factor 2	51786	O35218	FB-P20	-1.68307	0.0315633	0.0990341	no	-1.68307	0.0990341	2	3	3	P20	mouse
O35218	Cpsf2	cleavage and polyadenylation specific factor 2	51786	O35218	FB-P5	-0.495342	0.423697	0.599091	no	-0.495342	0.599091	2	3	3	P5	mouse
O35226	Psmd4	proteasome (prosome, macropain) 26S subunit, non-ATPase, 4	19185	O35226	FB-P5	-0.85085	0.0660306	0.18225	no	-0.85085	0.18225	3	3	3	P5	mouse
O35226	Psmd4	proteasome (prosome, macropain) 26S subunit, non-ATPase, 4	19185	O35226	P5-P20	-0.414731	0.316104	0.767647	no	-0.414731	0.767647	3	3	3	P20	mouse
O35226	Psmd4	proteasome (prosome, macropain) 26S subunit, non-ATPase, 4	19185	O35226	FB-P20	-1.26558	0.0156696	0.0622093	no	-1.26558	0.0622093	3	3	3	P20	mouse
O35280	Chek1	checkpoint kinase 1	12649	O35280	FB-P20	-0.408593	0.761976	0.847996	no	-0.408593	0.847996	2	3	3	P20	mouse
O35280	Chek1	checkpoint kinase 1	12649	O35280	P5-P20	0.310172	0.796852	0.965113	no	0.310172	0.965113	2	3	3	P5	mouse
O35280	Chek1	checkpoint kinase 1	12649	O35280	FB-P5	-0.718765	0.5979	0.73766	no	-0.718765	0.73766	2	3	3	P5	mouse
O35286	Dhx15	DEAH (Asp-Glu-Ala-His) box polypeptide 15	13204	O35286	P5-P20	0.0302297	0.952933	0.990855	no	0.0302297	0.990855	3	3	3	P5	mouse
O35286	Dhx15	DEAH (Asp-Glu-Ala-His) box polypeptide 15	13204	O35286	FB-P20	-0.36069	0.490514	0.627497	no	-0.36069	0.627497	3	3	3	P20	mouse
O35286	Dhx15	DEAH (Asp-Glu-Ala-His) box polypeptide 15	13204	O35286	FB-P5	-0.39092	0.456507	0.629092	no	-0.39092	0.629092	3	3	3	P5	mouse
O35295	Purb	purine rich element binding protein B	19291	O35295	FB-P5	-0.668308	0.76588	0.862777	no	-0.668308	0.862777	1	3	3	P5	mouse
O35295	Purb	purine rich element binding protein B	19291	O35295	FB-P20	-1.04664	0.643867	0.756972	no	-1.04664	0.756972	1	3	3	P20	mouse
O35295	Purb	purine rich element binding protein B	19291	O35295	P5-P20	-0.378335	0.811171	0.971939	no	-0.378335	0.971939	1	3	3	P20	mouse
P70441	Slc9a3r1	solute carrier family 9 (sodium/hydrogen exchanger), member 3 regulator 1	26941	P70441	FB-P5	-4.18224	3.61112e-06	0.000944144	no	-4.18224	0.000944144	3	3	3	P5	mouse
Q3UZ39	Lrrfip1	leucine rich repeat (in FLII) interacting protein 1	16978	Q3UZ39	FB-P20	-4.38847	0.000858388	0.0111315	no	-4.38847	0.0111315	2	3	3	P20	mouse
O35326	Srsf5	serine and arginine-rich splicing factor 5	20384	O35326	P5-P20	-0.010589	0.985559	0.997653	no	-0.010589	0.997653	3	3	3	P20	mouse
O35343	Kpna4	karyopherin (importin) alpha 4	16649	O35343	FB-P5	-0.851222	0.317839	0.497878	no	-0.851222	0.497878	3	3	3	P5	mouse
O35343	Kpna4	karyopherin (importin) alpha 4	16649	O35343	FB-P20	-0.589825	0.478953	0.617035	no	-0.589825	0.617035	3	3	3	P20	mouse
O35343	Kpna4	karyopherin (importin) alpha 4	16649	O35343	P5-P20	0.261397	0.749387	0.956906	no	0.261397	0.956906	3	3	3	P5	mouse
O35344	Kpna3	karyopherin (importin) alpha 3	16648	O35344	P5-P20	-0.122711	0.804241	0.970028	no	-0.122711	0.970028	3	3	3	P20	mouse
O35344	Kpna3	karyopherin (importin) alpha 3	16648	O35344	FB-P20	-1.45521	0.0218783	0.0759105	no	-1.45521	0.0759105	3	3	3	P20	mouse
O35344	Kpna3	karyopherin (importin) alpha 3	16648	O35344	FB-P5	-1.3325	0.0306267	0.11499	no	-1.3325	0.11499	3	3	3	P5	mouse
O35345	Kpna6	karyopherin (importin) alpha 6	16650	O35345	FB-P5	-1.69081	0.111742	0.250679	no	-1.69081	0.250679	3	3	3	P5	mouse
O35345	Kpna6	karyopherin (importin) alpha 6	16650	O35345	P5-P20	-0.131483	0.889549	0.982545	no	-0.131483	0.982545	3	3	3	P20	mouse
O35345	Kpna6	karyopherin (importin) alpha 6	16650	O35345	FB-P20	-1.82229	0.0914093	0.201004	no	-1.82229	0.201004	3	3	3	P20	mouse
O35350	Capn1	calpain 1	12333	O35350	FB-P5	-0.420791	0.663165	0.785203	no	-0.420791	0.785203	3	3	3	P5	mouse
O35350	Capn1	calpain 1	12333	O35350	FB-P20	-1.84003	0.0921539	0.202184	no	-1.84003	0.202184	3	3	3	P20	mouse
O35350	Capn1	calpain 1	12333	O35350	P5-P20	-1.41924	0.173473	0.687467	no	-1.41924	0.687467	3	3	3	P20	mouse
O35381	Anp32a	acidic (leucine-rich) nuclear phosphoprotein 32 family, member A	11737	O35381	FB-P5	-0.588671	0.573002	0.719317	no	-0.588671	0.719317	1	3	3	P5	mouse
O35381	Anp32a	acidic (leucine-rich) nuclear phosphoprotein 32 family, member A	11737	O35381	FB-P20	-2.40008	0.066812	0.162959	no	-2.40008	0.162959	1	3	3	P20	mouse
O35381	Anp32a	acidic (leucine-rich) nuclear phosphoprotein 32 family, member A	11737	O35381	P5-P20	-1.81141	0.0559405	0.527033	no	-1.81141	0.527033	1	3	3	P20	mouse
O35382	Exoc4	exocyst complex component 4	20336	O35382	FB-P20	-1.16841	0.070305	0.168294	no	-1.16841	0.168294	1	3	2	P20	mouse
O35382	Exoc4	exocyst complex component 4	20336	O35382	P5-P20	-0.245218	0.517163	0.873621	no	-0.245218	0.873621	1	3	2	P20	mouse
O35382	Exoc4	exocyst complex component 4	20336	O35382	FB-P5	-0.923189	0.132243	0.282984	no	-0.923189	0.282984	1	3	2	P5	mouse
O35405	Pld3	phospholipase D family, member 3	18807	O35405	P5-P20	0.381441	0.445231	0.838083	no	0.381441	0.838083	3	3	3	P5	mouse
O35405	Pld3	phospholipase D family, member 3	18807	O35405	FB-P5	-1.29202	0.0325593	0.118383	no	-1.29202	0.118383	3	3	3	P5	mouse
O35405	Pld3	phospholipase D family, member 3	18807	O35405	FB-P20	-0.910575	0.0990633	0.212705	no	-0.910575	0.212705	3	3	3	P20	mouse
O35435	Dhodh	dihydroorotate dehydrogenase	56749	O35435	P5-P20	-1.50934	0.0854252	0.584517	no	-1.50934	0.584517	3	3	2	P20	mouse
O35435	Dhodh	dihydroorotate dehydrogenase	56749	O35435	FB-P20	0.60981	0.378312	0.525174	no	0.60981	0.525174	3	3	2	FB	mouse
O35435	Dhodh	dihydroorotate dehydrogenase	56749	O35435	FB-P5	2.11915	0.0299884	0.11384	no	2.11915	0.11384	3	3	2	FB	mouse
O35445	Rnf5	ring finger protein 5	54197	O35445	P5-P20	-0.109749	0.625931	0.923105	no	-0.109749	0.923105	0	2	2	P20	mouse
Q9JJF3	Riox1	ribosomal oxygenase 1	71952	Q9JJF3	P5-P20	#NUM!		0	yes	6.85972	0.0469188	0	0	3	P5	mouse
O08573	Lgals9	lectin, galactose binding, soluble 9	16859	O08573	FB-P5	#NUM!		0	yes	6.82353	0.0226386	2	1	0	FB	mouse
Q8BSZ2	Ap3s2	adaptor-related protein complex 3, sigma 2 subunit	11778	Q8BSZ2	P5-P20	#NUM!		0	yes	6.81841	0.0495147	1	0	2	P5	mouse
Q922H1	Prmt3	protein arginine N-methyltransferase 3	71974	Q922H1	P5-P20	#NUM!		0	yes	6.78778	0.035603	1	0	2	P5	mouse
O35459	Ech1	enoyl coenzyme A hydratase 1, peroxisomal	51798	O35459	P5-P20	-0.780488	0.090426	0.589915	no	-0.780488	0.589915	0	3	3	P20	mouse
O35465	Fkbp8	FK506 binding protein 8	14232	O35465	P5-P20	-0.524236	0.23998	0.724864	no	-0.524236	0.724864	3	3	3	P20	mouse
O35465	Fkbp8	FK506 binding protein 8	14232	O35465	FB-P5	-0.388097	0.371597	0.549253	no	-0.388097	0.549253	3	3	3	P5	mouse
O35465	Fkbp8	FK506 binding protein 8	14232	O35465	FB-P20	-0.912334	0.0637025	0.158469	no	-0.912334	0.158469	3	3	3	P20	mouse
O35490	Bhmt	betaine-homocysteine methyltransferase	12116	O35490	P5-P20	0.457713	0.0458262	0.510495	no	0.457713	0.510495	3	3	3	P5	mouse
O35490	Bhmt	betaine-homocysteine methyltransferase	12116	O35490	FB-P20	0.569378	0.0204831	0.0728899	no	0.569378	0.0728899	3	3	3	FB	mouse
O35490	Bhmt	betaine-homocysteine methyltransferase	12116	O35490	FB-P5	0.111665	0.562591	0.711233	no	0.111665	0.711233	3	3	3	FB	mouse
P56841	Tcl1b2	T cell leukemia/lymphoma 1B, 2	27381	P56841	FB-P5	#NUM!		0	yes	6.70874	0.048246	2	1	0	FB	mouse
Q8C7E7	Stbd1	starch binding domain 1	52331	Q8C7E7	FB-P5	#NUM!		0	yes	6.7084	0.0445767	2	1	0	FB	mouse
O35495	Cdk14	cyclin-dependent kinase 14	18647	O35495	P5-P20	-2.87727	0.0741145	0.566667	no	-2.87727	0.566667	0	2	2	P20	mouse
E9QAG8	Zfp932	zinc finger protein 932	69504	E9QAG8	FB-P20	#NUM!		0	yes	6.68928	0.021462	2	0	1	FB	mouse
O35551	Rabep1	rabaptin, RAB GTPase binding effector protein 1	54189	O35551	FB-P20	-0.594804	0.45373	0.595317	no	-0.594804	0.595317	1	3	0	P20	mouse
O35566	Cd151	CD151 antigen	12476	O35566	P5-P20	-0.971068	0.212384	0.718013	no	-0.971068	0.718013	0	3	3	P20	mouse
O08914	Faah	fatty acid amide hydrolase	14073	O08914	FB-P20	#NUM!		0	yes	6.68498	0.0161516	2	0	0	FB	mouse
Q9Z321	Top3b	topoisomerase (DNA) III beta	21976	Q9Z321	FB-P5	#NUM!		0	yes	6.54784	0.0460245	2	2	0	FB	mouse
O35593	Psmd14	proteasome (prosome, macropain) 26S subunit, non-ATPase, 14	59029	O35593	FB-P5	-0.41	0.232629	0.41248	no	-0.41	0.41248	3	3	3	P5	mouse
O35593	Psmd14	proteasome (prosome, macropain) 26S subunit, non-ATPase, 14	59029	O35593	P5-P20	-0.0291486	0.927884	0.989186	no	-0.0291486	0.989186	3	3	3	P20	mouse
O35593	Psmd14	proteasome (prosome, macropain) 26S subunit, non-ATPase, 14	59029	O35593	FB-P20	-0.439148	0.204911	0.352969	no	-0.439148	0.352969	3	3	3	P20	mouse
O35598	Adam10	a disintegrin and metallopeptidase domain 10	11487	O35598	FB-P5	-2.01078	0.0704937	0.188858	no	-2.01078	0.188858	2	3	3	P5	mouse
O35598	Adam10	a disintegrin and metallopeptidase domain 10	11487	O35598	P5-P20	-0.860473	0.322851	0.776139	no	-0.860473	0.776139	2	3	3	P20	mouse
O35598	Adam10	a disintegrin and metallopeptidase domain 10	11487	O35598	FB-P20	-2.87125	0.0221377	0.076271	no	-2.87125	0.076271	2	3	3	P20	mouse
O35604	Npc1	NPC intracellular cholesterol transporter 1	18145	O35604	P5-P20	-0.229508	0.719153	0.949998	no	-0.229508	0.949998	3	3	2	P20	mouse
O35604	Npc1	NPC intracellular cholesterol transporter 1	18145	O35604	FB-P20	-1.05093	0.1089	0.226494	no	-1.05093	0.226494	3	3	2	P20	mouse
O35604	Npc1	NPC intracellular cholesterol transporter 1	18145	O35604	FB-P5	-0.821418	0.231324	0.410925	no	-0.821418	0.410925	3	3	2	P5	mouse
O35609	Scamp3	secretory carrier membrane protein 3	24045	O35609	P5-P20	-0.605084	0.701295	0.943191	no	-0.605084	0.943191	0	2	2	P20	mouse
O88531	Ppt1	palmitoyl-protein thioesterase 1	19063	O88531	FB-P20	#NUM!		0	yes	6.53255	0.0290928	2	0	1	FB	mouse
Q9D198	Syf2	SYF2 homolog, RNA splicing factor (S. cerevisiae)	68592	Q9D198	P5-P20	#NUM!		0	yes	6.50532	0.0120751	1	0	2	P5	mouse
O35618	Mdm4	transformed mouse 3T3 cell double minute 4	17248	O35618	P5-P20	0.196662	0.56811	0.901842	no	0.196662	0.901842	0	2	1	P5	mouse
Q61712	Dnajc1	DnaJ heat shock protein family (Hsp40) member C1	13418	Q61712	FB-P5	#NUM!		0	yes	6.43532	0.0452371	2	1	0	FB	mouse
O35621	Pmm1	phosphomannomutase 1	29858	O35621	FB-P5	-0.00870711	0.98661	0.992129	no	-0.00870711	0.992129	3	3	3	P5	mouse
O35621	Pmm1	phosphomannomutase 1	29858	O35621	FB-P20	0.570159	0.295606	0.439867	no	0.570159	0.439867	3	3	3	FB	mouse
O35621	Pmm1	phosphomannomutase 1	29858	O35621	P5-P20	0.578866	0.288969	0.755798	no	0.578866	0.755798	3	3	3	P5	mouse
O35638	Stag2	stromal antigen 2	20843	O35638	FB-P5	0.570106	0.465621	0.634357	no	0.570106	0.634357	3	2	2	FB	mouse
O35638	Stag2	stromal antigen 2	20843	O35638	FB-P20	1.04917	0.212319	0.360201	no	1.04917	0.360201	3	2	2	FB	mouse
O35638	Stag2	stromal antigen 2	20843	O35638	P5-P20	0.479068	0.570028	0.902195	no	0.479068	0.902195	3	2	2	P5	mouse
Q80SY5	Prpf38b	PRP38 pre-mRNA processing factor 38 (yeast) domain containing B	66921	Q80SY5	FB-P20	#NUM!		0	yes	6.38116	0.0338472	2	0	1	FB	mouse
O35639	Anxa3	annexin A3	11745	O35639	P5-P20	-0.766192	0.341513	0.780086	no	-0.766192	0.780086	0	3	3	P20	mouse
Q61495	Dsg1a	desmoglein 1 alpha	13510	Q61495	FB-P20	#NUM!		0	yes	6.28912	0.0148823	2	0	1	FB	mouse
O35643	Ap1b1	adaptor protein complex AP-1, beta 1 subunit	11764	O35643	P5-P20	-0.233993	0.661176	0.929301	no	-0.233993	0.929301	3	3	3	P20	mouse
O35643	Ap1b1	adaptor protein complex AP-1, beta 1 subunit	11764	O35643	FB-P5	-0.351583	0.514599	0.674252	no	-0.351583	0.674252	3	3	3	P5	mouse
O35643	Ap1b1	adaptor protein complex AP-1, beta 1 subunit	11764	O35643	FB-P20	-0.585576	0.292708	0.438202	no	-0.585576	0.438202	3	3	3	P20	mouse
O35648	Cetn3	centrin 3	12626	O35648	FB-P5	2.40555	0.192382	0.366417	no	2.40555	0.366417	2	3	1	FB	mouse
O35648	Cetn3	centrin 3	12626	O35648	P5-P20	-0.807231	0.592889	0.913576	no	-0.807231	0.913576	2	3	1	P20	mouse
O35648	Cetn3	centrin 3	12626	O35648	FB-P20	1.59832	0.232077	0.380878	no	1.59832	0.380878	2	3	1	FB	mouse
O35654	Pold2	polymerase (DNA directed), delta 2, regulatory subunit	18972	O35654	FB-P20	-0.630657	0.462072	0.600858	no	-0.630657	0.600858	2	3	3	P20	mouse
O35654	Pold2	polymerase (DNA directed), delta 2, regulatory subunit	18972	O35654	P5-P20	1.23242	0.142457	0.651126	no	1.23242	0.651126	2	3	3	P5	mouse
O35654	Pold2	polymerase (DNA directed), delta 2, regulatory subunit	18972	O35654	FB-P5	-1.86308	0.0654076	0.181439	no	-1.86308	0.181439	2	3	3	P5	mouse
O35658	O35658			O35658	P5-P20	0.886221	0.310092	0.765524	no	0.886221	0.765524	3	3	3	P5	mouse
O35658	O35658			O35658	FB-P5	0.966628	0.272113	0.453943	no	0.966628	0.453943	3	3	3	FB	mouse
O35658	O35658			O35658	FB-P20	1.85285	0.0596472	0.150433	no	1.85285	0.150433	3	3	3	FB	mouse
O88796	Rpp30	ribonuclease P/MRP 30 subunit	54364	O88796	FB-P5	#NUM!		0	yes	6.24374	0.0121477	2	1	0	FB	mouse
O35683	Ndufa1	NADH:ubiquinone oxidoreductase subunit A1	54405	O35683	P5-P20	-1.63315	0.518286	0.873695	no	-1.63315	0.873695	0	1	2	P20	mouse
O35685	Nudc	nudC nuclear distribution protein	18221	O35685	FB-P5	0.0859298	0.804379	0.883128	no	0.0859298	0.883128	3	3	3	FB	mouse
O35685	Nudc	nudC nuclear distribution protein	18221	O35685	FB-P20	0.282521	0.42734	0.572068	no	0.282521	0.572068	3	3	3	FB	mouse
O35685	Nudc	nudC nuclear distribution protein	18221	O35685	P5-P20	0.196592	0.575291	0.904865	no	0.196592	0.904865	3	3	3	P5	mouse
O35691	Pnn	pinin	18949	O35691	FB-P5	-1.36597	0.0306152	0.11499	no	-1.36597	0.11499	3	3	3	P5	mouse
O35691	Pnn	pinin	18949	O35691	P5-P20	-0.800352	0.150349	0.661654	no	-0.800352	0.661654	3	3	3	P20	mouse
Q91YD9	Wasl	WASP like actin nucleation promoting factor	73178	Q91YD9	FB-P20	-4.36596	0.00164467	0.0154811	no	-4.36596	0.0154811	2	3	3	P20	mouse
O35704	Sptlc1	serine palmitoyltransferase, long chain base subunit 1	268656	O35704	FB-P20	-2.97522	0.0687286	0.165607	no	-2.97522	0.165607	2	3	2	P20	mouse
O35704	Sptlc1	serine palmitoyltransferase, long chain base subunit 1	268656	O35704	P5-P20	-0.505037	0.696214	0.942504	no	-0.505037	0.942504	2	3	2	P20	mouse
O35704	Sptlc1	serine palmitoyltransferase, long chain base subunit 1	268656	O35704	FB-P5	-2.47019	0.134165	0.28667	no	-2.47019	0.28667	2	3	2	P5	mouse
O35711	Ppfibp2	PTPRF interacting protein, binding protein 2 (liprin beta 2)	19024	O35711	FB-P5	0.637239	0.358945	0.53795	no	0.637239	0.53795	3	3	3	FB	mouse
O35711	Ppfibp2	PTPRF interacting protein, binding protein 2 (liprin beta 2)	19024	O35711	FB-P20	0.415486	0.541214	0.672312	no	0.415486	0.672312	3	3	3	FB	mouse
O35711	Ppfibp2	PTPRF interacting protein, binding protein 2 (liprin beta 2)	19024	O35711	P5-P20	-0.221753	0.741411	0.955843	no	-0.221753	0.955843	3	3	3	P20	mouse
O35737	Hnrnph1	heterogeneous nuclear ribonucleoprotein H1	59013	O35737	P5-P20	-0.228399	0.610723	0.918912	no	-0.228399	0.918912	3	3	3	P20	mouse
O35737	Hnrnph1	heterogeneous nuclear ribonucleoprotein H1	59013	O35737	FB-P5	-0.375551	0.411398	0.590999	no	-0.375551	0.590999	3	3	3	P5	mouse
O35737	Hnrnph1	heterogeneous nuclear ribonucleoprotein H1	59013	O35737	FB-P20	-0.60395	0.205579	0.353285	no	-0.60395	0.353285	3	3	3	P20	mouse
O35841	Api5	apoptosis inhibitor 5	11800	O35841	P5-P20	-0.0685701	0.797321	0.965113	no	-0.0685701	0.965113	3	3	3	P20	mouse
O35841	Api5	apoptosis inhibitor 5	11800	O35841	FB-P20	-0.735525	0.0280614	0.0909813	no	-0.735525	0.0909813	3	3	3	P20	mouse
O35841	Api5	apoptosis inhibitor 5	11800	O35841	FB-P5	-0.666955	0.0400442	0.133605	no	-0.666955	0.133605	3	3	3	P5	mouse
Q9D832	Dnajb4	DnaJ heat shock protein family (Hsp40) member B4	67035	Q9D832	FB-P5	#NUM!		0	yes	6.01613	0.0430593	2	0	0	FB	mouse
O35855	Bcat2	branched chain aminotransferase 2, mitochondrial	12036	O35855	P5-P20	0.305899	0.763525	0.958335	no	0.305899	0.958335	0	1	3	P5	mouse
O35857	Timm44	translocase of inner mitochondrial membrane 44	21856	O35857	P5-P20	0.167114	0.655069	0.929012	no	0.167114	0.929012	3	3	3	P5	mouse
O35857	Timm44	translocase of inner mitochondrial membrane 44	21856	O35857	FB-P5	-0.586775	0.150105	0.30902	no	-0.586775	0.30902	3	3	3	P5	mouse
O35857	Timm44	translocase of inner mitochondrial membrane 44	21856	O35857	FB-P20	-0.419662	0.282718	0.429676	no	-0.419662	0.429676	3	3	3	P20	mouse
O35864	Cops5	COP9 signalosome subunit 5	26754	O35864	FB-P20	0.857886	0.0539958	0.141183	no	0.857886	0.141183	3	3	3	FB	mouse
O35864	Cops5	COP9 signalosome subunit 5	26754	O35864	FB-P5	0.393154	0.315318	0.495256	no	0.393154	0.495256	3	3	3	FB	mouse
O35864	Cops5	COP9 signalosome subunit 5	26754	O35864	P5-P20	0.464732	0.242939	0.724864	no	0.464732	0.724864	3	3	3	P5	mouse
O35887	Calu	calumenin	12321	O35887	FB-P20	-4.15339	0.0156096	0.0620958	no	-4.15339	0.0620958	3	3	3	P20	mouse
O35887	Calu	calumenin	12321	O35887	P5-P20	-0.354778	0.785001	0.961507	no	-0.354778	0.961507	3	3	3	P20	mouse
O35887	Calu	calumenin	12321	O35887	FB-P5	-3.79861	0.0223737	0.0949939	no	-3.79861	0.0949939	3	3	3	P5	mouse
O35900	Lsm2	LSM2 homolog, U6 small nuclear RNA and mRNA degradation associated	27756	O35900	FB-P20	-1.11642	0.434167	0.578229	no	-1.11642	0.578229	1	2	3	P20	mouse
O35900	Lsm2	LSM2 homolog, U6 small nuclear RNA and mRNA degradation associated	27756	O35900	FB-P5	-0.71841	0.582232	0.726149	no	-0.71841	0.726149	1	2	3	P5	mouse
O35900	Lsm2	LSM2 homolog, U6 small nuclear RNA and mRNA degradation associated	27756	O35900	P5-P20	-0.398012	0.695709	0.94237	no	-0.398012	0.94237	1	2	3	P20	mouse
Q9DBH0	Wwp2	WW domain containing E3 ubiquitin protein ligase 2	66894	Q9DBH0	FB-P20	#NUM!		0	yes	5.98087	0.0155497	2	0	1	FB	mouse
Q9QY93	Dctpp1	dCTP pyrophosphatase 1	66422	Q9QY93	P5-P20	#NUM!		0	yes	5.96685	0.0462985	1	0	2	P5	mouse
O35904	Pik3cd	phosphatidylinositol-4,5-bisphosphate 3-kinase catalytic subunit delta	18707	O35904	FB-P20	2.08768	0.0148674	0.0600978	no	2.08768	0.0600978	3	2	0	FB	mouse
O35930	Gp1ba	glycoprotein 1b, alpha polypeptide	14723	O35930	P5-P20	0.46264	0.617121	0.920721	no	0.46264	0.920721	3	3	3	P5	mouse
O35930	Gp1ba	glycoprotein 1b, alpha polypeptide	14723	O35930	FB-P20	2.58261	0.02589	0.0860446	no	2.58261	0.0860446	3	3	3	FB	mouse
O35930	Gp1ba	glycoprotein 1b, alpha polypeptide	14723	O35930	FB-P5	2.11997	0.0522356	0.157174	no	2.11997	0.157174	3	3	3	FB	mouse
O35988	Sdc4	syndecan 4	20971	O35988	FB-P5	-0.61688	0.410644	0.59021	no	-0.61688	0.59021	3	3	3	P5	mouse
O35988	Sdc4	syndecan 4	20971	O35988	P5-P20	-2.20216	0.019658	0.409399	no	-2.20216	0.409399	3	3	3	P20	mouse
P70441	Slc9a3r1	solute carrier family 9 (sodium/hydrogen exchanger), member 3 regulator 1	26941	P70441	FB-P20	-4.33876	2.90885e-06	0.000613093	no	-4.33876	0.000613093	3	3	3	P20	mouse
Q9D7P7	Clic3	chloride intracellular channel 3	69454	Q9D7P7	FB-P20	#NUM!		0	yes	5.89307	0.0417315	2	0	1	FB	mouse
O54692	Zw10	zw10 kinetochore protein	26951	O54692	P5-P20	-0.600689	0.333463	0.778902	no	-0.600689	0.778902	0	3	2	P20	mouse
Q8VCM4	Lipt1	lipoyltransferase 1	623661	Q8VCM4	P5-P20	#NUM!		0	yes	5.83926	0.0260752	1	0	2	P5	mouse
O54734	Ddost	dolichyl-di-phosphooligosaccharide-protein glycotransferase	13200	O54734	FB-P20	-0.939425	0.0623786	0.156107	no	-0.939425	0.156107	3	3	3	P20	mouse
O54734	Ddost	dolichyl-di-phosphooligosaccharide-protein glycotransferase	13200	O54734	P5-P20	-0.584169	0.205187	0.707521	no	-0.584169	0.707521	3	3	3	P20	mouse
O54734	Ddost	dolichyl-di-phosphooligosaccharide-protein glycotransferase	13200	O54734	FB-P5	-0.355256	0.420746	0.597269	no	-0.355256	0.597269	3	3	3	P5	mouse
O54774	Ap3d1	adaptor-related protein complex 3, delta 1 subunit	11776	O54774	FB-P20	-1.91739	0.119637	0.242769	no	-1.91739	0.242769	1	3	3	P20	mouse
O54774	Ap3d1	adaptor-related protein complex 3, delta 1 subunit	11776	O54774	P5-P20	-0.428321	0.566698	0.901842	no	-0.428321	0.901842	1	3	3	P20	mouse
O54774	Ap3d1	adaptor-related protein complex 3, delta 1 subunit	11776	O54774	FB-P5	-1.48907	0.200064	0.376806	no	-1.48907	0.376806	1	3	3	P5	mouse
Q8K339	Kin	Kin17 DNA and RNA binding protein	16588	Q8K339	FB-P20	#NUM!		0	yes	5.78157	0.0341922	2	0	2	FB	mouse
Q9D8B4	Q9D8B4			Q9D8B4	FB-P5	#NUM!		0	yes	5.77117	0.0296473	2	1	0	FB	mouse
O54804	Chka	choline kinase alpha	12660	O54804	FB-P20	1.34342	0.306981	0.45127	no	1.34342	0.45127	3	2	0	FB	mouse
O54824	Il16	interleukin 16	16170	O54824	P5-P20	2.43075	0.184367	0.688053	no	2.43075	0.688053	1	2	2	P5	mouse
O54824	Il16	interleukin 16	16170	O54824	FB-P5	-1.71848	0.368817	0.546762	no	-1.71848	0.546762	1	2	2	P5	mouse
O54824	Il16	interleukin 16	16170	O54824	FB-P20	0.712272	0.680402	0.783725	no	0.712272	0.783725	1	2	2	FB	mouse
O54825	Bysl	bystin-like	53414	O54825	FB-P5	-0.774678	0.13837	0.292396	no	-0.774678	0.292396	3	3	3	P5	mouse
O54825	Bysl	bystin-like	53414	O54825	FB-P20	0.0942498	0.842196	0.907842	no	0.0942498	0.907842	3	3	3	FB	mouse
O54825	Bysl	bystin-like	53414	O54825	P5-P20	0.868928	0.103758	0.610566	no	0.868928	0.610566	3	3	3	P5	mouse
O54826	Mllt10	myeloid/lymphoid or mixed-lineage leukemia; translocated to, 10	17354	O54826	P5-P20	-0.887566	0.223917	0.721531	no	-0.887566	0.721531	0	2	3	P20	mouse
Q69ZX6	Morc2a	microrchidia 2A	74522	Q69ZX6	FB-P5	#NUM!		0	yes	5.69099	0.0280853	2	1	0	FB	mouse
Q99JN2	Klhl22	kelch-like 22	224023	Q99JN2	FB-P5	#NUM!		0	yes	5.65542	0.0220599	2	1	0	FB	mouse
O54833	Csnk2a2	casein kinase 2, alpha prime polypeptide	13000	O54833	FB-P5	-0.595595	0.531581	0.68804	no	-0.595595	0.68804	1	3	3	P5	mouse
O54833	Csnk2a2	casein kinase 2, alpha prime polypeptide	13000	O54833	P5-P20	-0.328972	0.621484	0.923001	no	-0.328972	0.923001	1	3	3	P20	mouse
O54833	Csnk2a2	casein kinase 2, alpha prime polypeptide	13000	O54833	FB-P20	-0.924567	0.34822	0.495419	no	-0.924567	0.495419	1	3	3	P20	mouse
O54864	Suv39h1	suppressor of variegation 3-9 1	20937	O54864	P5-P20	1.06982	0.374026	0.80861	no	1.06982	0.80861	0	1	3	P5	mouse
Q9DBE0	Csad	cysteine sulfinic acid decarboxylase	246277	Q9DBE0	FB-P20	#NUM!		0	yes	5.57581	0.0450228	2	0	1	FB	mouse
O54879	Hmgb3	high mobility group box 3	15354	O54879	FB-P5	-1.4221	0.05071	0.155068	no	-1.4221	0.155068	2	3	3	P5	mouse
O54879	Hmgb3	high mobility group box 3	15354	O54879	P5-P20	-0.271217	0.608764	0.91853	no	-0.271217	0.91853	2	3	3	P20	mouse
O54879	Hmgb3	high mobility group box 3	15354	O54879	FB-P20	-1.69332	0.0285216	0.0921663	no	-1.69332	0.0921663	2	3	3	P20	mouse
P36552	Cpox	coproporphyrinogen oxidase	12892	P36552	FB-P5	#NUM!		0	yes	5.53809	0.0488391	2	3	0	FB	mouse
P56390	Cks2	CDC28 protein kinase regulatory subunit 2	66197	P56390	FB-P20	#NUM!		0	yes	5.41806	0.0126029	2	0	2	FB	mouse
O54891	Lgals6	lectin, galactose binding, soluble 6	16857	O54891	P5-P20	0.941555	0.12366	0.634892	no	0.941555	0.634892	0	3	3	P5	mouse
Q9JI48	Plac8	placenta-specific 8	231507	Q9JI48	P5-P20	#NUM!		0	yes	5.26029	0.0125579	1	0	2	P5	mouse
Q91VA6	Poldip2	polymerase (DNA-directed), delta interacting protein 2	67811	Q91VA6	P5-P20	#NUM!		0	yes	5.04519	0.0430591	1	0	2	P5	mouse
O54916	Reps1	RalBP1 associated Eps domain containing protein	19707	O54916	P5-P20	-1.05173	0.0633238	0.541608	no	-1.05173	0.541608	0	3	3	P20	mouse
O54927	Wsb1	WD repeat and SOCS box-containing 1	78889	O54927	P5-P20	-0.187566	0.841505	0.97646	no	-0.187566	0.97646	2	1	3	P20	mouse
O54927	Wsb1	WD repeat and SOCS box-containing 1	78889	O54927	FB-P5	0.47508	0.535392	0.690797	no	0.47508	0.690797	2	1	3	FB	mouse
O54927	Wsb1	WD repeat and SOCS box-containing 1	78889	O54927	FB-P20	0.287515	0.773487	0.85721	no	0.287515	0.85721	2	1	3	FB	mouse
O54941	Smarce1	SWI/SNF related, matrix associated, actin dependent regulator of chromatin, subfamily e, member 1	57376	O54941	FB-P20	-1.12059	0.124869	0.249226	no	-1.12059	0.249226	3	3	3	P20	mouse
O54941	Smarce1	SWI/SNF related, matrix associated, actin dependent regulator of chromatin, subfamily e, member 1	57376	O54941	FB-P5	-1.63212	0.0408367	0.135619	no	-1.63212	0.135619	3	3	3	P5	mouse
O54941	Smarce1	SWI/SNF related, matrix associated, actin dependent regulator of chromatin, subfamily e, member 1	57376	O54941	P5-P20	0.511533	0.446802	0.839336	no	0.511533	0.839336	3	3	3	P5	mouse
O54946	Dnajb6	DnaJ heat shock protein family (Hsp40) member B6	23950	O54946	P5-P20	0.125909	0.929262	0.989186	no	0.125909	0.989186	3	3	3	P5	mouse
O54946	Dnajb6	DnaJ heat shock protein family (Hsp40) member B6	23950	O54946	FB-P5	-0.83088	0.563711	0.711379	no	-0.83088	0.711379	3	3	3	P5	mouse
O54946	Dnajb6	DnaJ heat shock protein family (Hsp40) member B6	23950	O54946	FB-P20	-0.704971	0.622814	0.739369	no	-0.704971	0.739369	3	3	3	P20	mouse
O54962	Banf1	BAF nuclear assembly factor 1	23825	O54962	FB-P5	0.492724	0.588633	0.731665	no	0.492724	0.731665	3	3	3	FB	mouse
O54962	Banf1	BAF nuclear assembly factor 1	23825	O54962	P5-P20	0.524966	0.565148	0.901842	no	0.524966	0.901842	3	3	3	P5	mouse
O54962	Banf1	BAF nuclear assembly factor 1	23825	O54962	FB-P20	1.01769	0.282777	0.429676	no	1.01769	0.429676	3	3	3	FB	mouse
O54983	Crym	crystallin, mu	12971	O54983	P5-P20	-0.363249	0.261202	0.740311	no	-0.363249	0.740311	3	3	3	P20	mouse
Q7TNG5	Eml2	echinoderm microtubule associated protein like 2	72205	Q7TNG5	FB-P5	-4.08406	0.000803063	0.0136663	no	-4.08406	0.0136663	1	3	3	P5	mouse
Q3U7R1	Esyt1	extended synaptotagmin-like protein 1	23943	Q3U7R1	FB-P20	-4.31965	0.000641047	0.00955693	no	-4.31965	0.00955693	3	3	3	P20	mouse
O54984	Get3	guided entry of tail-anchored proteins factor 3, ATPase	56495	O54984	FB-P5	0.202087	0.539593	0.693418	no	0.202087	0.693418	3	3	3	FB	mouse
O54984	Get3	guided entry of tail-anchored proteins factor 3, ATPase	56495	O54984	FB-P20	-0.371227	0.277336	0.424268	no	-0.371227	0.424268	3	3	3	P20	mouse
O54984	Get3	guided entry of tail-anchored proteins factor 3, ATPase	56495	O54984	P5-P20	-0.573314	0.114606	0.626382	no	-0.573314	0.626382	3	3	3	P20	mouse
Q9CWS0	Ddah1	dimethylarginine dimethylaminohydrolase 1	69219	Q9CWS0	FB-P20	-4.31009	5.77013e-05	0.00251302	no	-4.31009	0.00251302	3	3	3	P20	mouse
O54988	Slk	STE20-like kinase	20874	O54988	FB-P5	-1.22937	0.018565	0.0847507	no	-1.22937	0.0847507	1	3	3	P5	mouse
O54988	Slk	STE20-like kinase	20874	O54988	P5-P20	-1.55536	0.00236601	0.227365	no	-1.55536	0.227365	1	3	3	P20	mouse
Q9D832	Dnajb4	DnaJ heat shock protein family (Hsp40) member B4	67035	Q9D832	FB-P20	#NUM!		0	yes	5.03764	0.0199333	2	0	0	FB	mouse
Q8BJ37	Q8BJ37			Q8BJ37	P5-P20	#NUM!		0	yes	4.9872	0.0340845	1	0	2	P5	mouse
O55003	Bnip3	BCL2/adenovirus E1B interacting protein 3	12176	O55003	P5-P20	-1.05042	0.105647	0.610566	no	-1.05042	0.610566	0	2	2	P20	mouse
O55013	Trappc3	trafficking protein particle complex 3	27096	O55013	P5-P20	-0.120936	0.84648	0.97646	no	-0.120936	0.97646	3	3	3	P20	mouse
O55013	Trappc3	trafficking protein particle complex 3	27096	O55013	FB-P20	-0.136584	0.826991	0.896006	no	-0.136584	0.896006	3	3	3	P20	mouse
O55013	Trappc3	trafficking protein particle complex 3	27096	O55013	FB-P5	-0.0156474	0.979982	0.989092	no	-0.0156474	0.989092	3	3	3	P5	mouse
O55022	Pgrmc1	progesterone receptor membrane component 1	53328	O55022	FB-P5	-1.31689	0.0278846	0.109259	no	-1.31689	0.109259	3	3	3	P5	mouse
O55111	Dsg2	desmoglein 2	13511	O55111	FB-P20	-4.23759	4.20959e-05	0.0020137	no	-4.23759	0.0020137	3	3	3	P20	mouse
O55022	Pgrmc1	progesterone receptor membrane component 1	53328	O55022	P5-P20	-1.08248	0.0554263	0.52576	no	-1.08248	0.52576	3	3	3	P20	mouse
O55029	Copb2	coatomer protein complex, subunit beta 2 (beta prime)	50797	O55029	FB-P5	-0.963242	0.144317	0.301352	no	-0.963242	0.301352	3	3	3	P5	mouse
O55029	Copb2	coatomer protein complex, subunit beta 2 (beta prime)	50797	O55029	P5-P20	0.800473	0.21258	0.718013	no	0.800473	0.718013	3	3	3	P5	mouse
O55029	Copb2	coatomer protein complex, subunit beta 2 (beta prime)	50797	O55029	FB-P20	-0.162769	0.786262	0.867415	no	-0.162769	0.867415	3	3	3	P20	mouse
O55033	Nck2	non-catalytic region of tyrosine kinase adaptor protein 2	17974	O55033	P5-P20	-1.11618	0.217205	0.71878	no	-1.11618	0.71878	1	3	3	P20	mouse
O55033	Nck2	non-catalytic region of tyrosine kinase adaptor protein 2	17974	O55033	FB-P5	-0.812491	0.493223	0.655806	no	-0.812491	0.655806	1	3	3	P5	mouse
O55033	Nck2	non-catalytic region of tyrosine kinase adaptor protein 2	17974	O55033	FB-P20	-1.92867	0.1483	0.280272	no	-1.92867	0.280272	1	3	3	P20	mouse
P56390	Cks2	CDC28 protein kinase regulatory subunit 2	66197	P56390	P5-P20	#NUM!		0	yes	4.95992	0.0412887	2	0	2	P5	mouse
O55047	Tlk2	tousled-like kinase 2 (Arabidopsis)	24086	O55047	P5-P20	-0.78835	0.260037	0.740311	no	-0.78835	0.740311	0	2	2	P20	mouse
Q99LJ8	Nus1	NUS1 dehydrodolichyl diphosphate synthase subunit	52014	Q99LJ8	P5-P20	#NUM!		0	yes	4.01233	0.011774	0	0	2	P5	mouse
O55060	Tpmt	thiopurine methyltransferase	22017	O55060	FB-P20	1.5433	0.134446	0.261717	no	1.5433	0.261717	2	3	3	FB	mouse
O55060	Tpmt	thiopurine methyltransferase	22017	O55060	P5-P20	-0.153994	0.85006	0.977657	no	-0.153994	0.977657	2	3	3	P20	mouse
O55060	Tpmt	thiopurine methyltransferase	22017	O55060	FB-P5	1.6973	0.106965	0.246105	no	1.6973	0.246105	2	3	3	FB	mouse
O55091	Impact	impact, RWD domain protein	16210	O55091	P5-P20	0.736864	0.57711	0.906258	no	0.736864	0.906258	2	1	2	P5	mouse
O55091	Impact	impact, RWD domain protein	16210	O55091	FB-P20	0.778832	0.557634	0.687733	no	0.778832	0.687733	2	1	2	FB	mouse
O55091	Impact	impact, RWD domain protein	16210	O55091	FB-P5	0.0419678	0.967465	0.98172	no	0.0419678	0.98172	2	1	2	FB	mouse
O55100	Syngr1	synaptogyrin 1	20972	O55100	P5-P20	-4.00019	0.153899	0.666595	no	-4.00019	0.666595	0	1	2	P20	mouse
Q6ZPF4	Fmnl3	formin-like 3	22379	Q6ZPF4	P5-P20	#NUM!		0	yes	3.57263	0.0111393	1	0	2	P5	mouse
O55106	Strn	striatin, calmodulin binding protein	268980	O55106	FB-P5	0.58787	0.354557	0.534717	no	0.58787	0.534717	3	3	3	FB	mouse
O55106	Strn	striatin, calmodulin binding protein	268980	O55106	FB-P20	-1.19153	0.0882895	0.196513	no	-1.19153	0.196513	3	3	3	P20	mouse
O55106	Strn	striatin, calmodulin binding protein	268980	O55106	P5-P20	-1.7794	0.0229172	0.412412	no	-1.7794	0.412412	3	3	3	P20	mouse
Q9ERG0	Lima1	LIM domain and actin binding 1	65970	Q9ERG0	FB-P5	-4.07958	1.0464e-05	0.00130846	no	-4.07958	0.00130846	2	3	3	P5	mouse
O55111	Dsg2	desmoglein 2	13511	O55111	P5-P20	-0.958899	0.0538258	0.52377	no	-0.958899	0.52377	3	3	3	P20	mouse
B1AY13	Usp24	ubiquitin specific peptidase 24	329908	B1AY13	FB-P20	-4.21394	0.00261725	0.0205937	no	-4.21394	0.0205937	1	3	3	P20	mouse
O55125	Nipsnap1	nipsnap homolog 1	18082	O55125	P5-P20	1.34131	0.0873132	0.584517	no	1.34131	0.584517	3	3	3	P5	mouse
O55125	Nipsnap1	nipsnap homolog 1	18082	O55125	FB-P5	1.91122	0.02704	0.10697	no	1.91122	0.10697	3	3	3	FB	mouse
Q69ZR2	Q69ZR2			Q69ZR2	FB-P20	-4.20869	0.00132331	0.0138633	no	-4.20869	0.0138633	3	3	3	P20	mouse
O55126	O55126			O55126	P5-P20	0.647712	0.0418846	0.501534	no	0.647712	0.501534	3	3	3	P5	mouse
O55126	O55126			O55126	FB-P5	0.543443	0.0737758	0.193594	no	0.543443	0.193594	3	3	3	FB	mouse
P10493	Nid1	nidogen 1	18073	P10493	FB-P20	-4.18653	0.00398956	0.0265183	no	-4.18653	0.0265183	1	3	3	P20	mouse
O55128	Sap18	Sin3-associated polypeptide 18	20220	O55128	P5-P20	0.887901	0.443806	0.837154	no	0.887901	0.837154	3	3	3	P5	mouse
O55128	Sap18	Sin3-associated polypeptide 18	20220	O55128	FB-P5	-0.817641	0.478999	0.644643	no	-0.817641	0.644643	3	3	3	P5	mouse
O55128	Sap18	Sin3-associated polypeptide 18	20220	O55128	FB-P20	0.0702602	0.950399	0.974769	no	0.0702602	0.974769	3	3	3	FB	mouse
E9Q557	Dsp	desmoplakin	109620	E9Q557	FB-P20	-4.18527	1.17427e-06	0.000489503	no	-4.18527	0.000489503	3	3	3	P20	mouse
O55131	Septin7	septin 7	235072	O55131	P5-P20	-0.683649	0.372232	0.807175	no	-0.683649	0.807175	3	3	3	P20	mouse
O55131	Septin7	septin 7	235072	O55131	FB-P5	-2.19221	0.0213476	0.0923241	no	-2.19221	0.0923241	3	3	3	P5	mouse
O55135	Eif6	eukaryotic translation initiation factor 6	16418	O55135	FB-P20	-0.210321	0.596777	0.719585	no	-0.210321	0.719585	3	3	3	P20	mouse
O55135	Eif6	eukaryotic translation initiation factor 6	16418	O55135	P5-P20	-0.401351	0.327603	0.776139	no	-0.401351	0.776139	3	3	3	P20	mouse
O55135	Eif6	eukaryotic translation initiation factor 6	16418	O55135	FB-P5	0.19103	0.630124	0.762085	no	0.19103	0.762085	3	3	3	FB	mouse
Q9QZQ8	Macroh2a1	macroH2A.1 histone	26914	Q9QZQ8	FB-P5	-4.05952	5.06138e-06	0.000983814	no	-4.05952	0.000983814	3	3	3	P5	mouse
Q9QXS1	Plec	plectin	18810	Q9QXS1	FB-P20	-4.1668	4.85083e-06	0.000705404	no	-4.1668	0.000705404	3	3	3	P20	mouse
O55142	Rpl35a	ribosomal protein L35A	57808	O55142	P5-P20	-0.51713	0.013072	0.354681	no	-0.51713	0.354681	3	3	3	P20	mouse
O55143	Atp2a2	ATPase, Ca++ transporting, cardiac muscle, slow twitch 2	11938	O55143	P5-P20	-0.812513	0.072248	0.56593	no	-0.812513	0.56593	3	3	3	P20	mouse
O55143	Atp2a2	ATPase, Ca++ transporting, cardiac muscle, slow twitch 2	11938	O55143	FB-P5	-1.00069	0.0364104	0.126316	no	-1.00069	0.126316	3	3	3	P5	mouse
Q810Q5	AA467197	expressed sequence AA467197	433470	Q810Q5	FB-P20	-4.12961	5.91763e-05	0.00253936	no	-4.12961	0.00253936	3	3	3	P20	mouse
O55201	Supt5	suppressor of Ty 5, DSIF elongation factor subunit	20924	O55201	FB-P20	-0.386106	0.246121	0.395039	no	-0.386106	0.395039	3	3	3	P20	mouse
O55201	Supt5	suppressor of Ty 5, DSIF elongation factor subunit	20924	O55201	FB-P5	-0.374783	0.258713	0.439168	no	-0.374783	0.439168	3	3	3	P5	mouse
O55201	Supt5	suppressor of Ty 5, DSIF elongation factor subunit	20924	O55201	P5-P20	-0.0113227	0.97116	0.995566	no	-0.0113227	0.995566	3	3	3	P20	mouse
O55222	Ilk	integrin linked kinase	16202	O55222	P5-P20	0.0194074	0.987311	0.998407	no	0.0194074	0.998407	3	3	3	P5	mouse
O55222	Ilk	integrin linked kinase	16202	O55222	FB-P20	-0.205063	0.866712	0.923093	no	-0.205063	0.923093	3	3	3	P20	mouse
O55222	Ilk	integrin linked kinase	16202	O55222	FB-P5	-0.22447	0.854269	0.91544	no	-0.22447	0.91544	3	3	3	P5	mouse
O55234	Psmb5	proteasome (prosome, macropain) subunit, beta type 5	19173	O55234	P5-P20	-0.147998	0.862361	0.978601	no	-0.147998	0.978601	3	3	3	P20	mouse
O55234	Psmb5	proteasome (prosome, macropain) subunit, beta type 5	19173	O55234	FB-P20	0.75647	0.390689	0.535361	no	0.75647	0.535361	3	3	3	FB	mouse
O55234	Psmb5	proteasome (prosome, macropain) subunit, beta type 5	19173	O55234	FB-P5	0.904468	0.311139	0.491476	no	0.904468	0.491476	3	3	3	FB	mouse
O70133	Dhx9	DEAH (Asp-Glu-Ala-His) box polypeptide 9	13211	O70133	FB-P5	-0.792958	0.0405869	0.135102	no	-0.792958	0.135102	3	3	3	P5	mouse
O70133	Dhx9	DEAH (Asp-Glu-Ala-His) box polypeptide 9	13211	O70133	P5-P20	-0.0816236	0.79784	0.965113	no	-0.0816236	0.965113	3	3	3	P20	mouse
O70133	Dhx9	DEAH (Asp-Glu-Ala-His) box polypeptide 9	13211	O70133	FB-P20	-0.874581	0.0284585	0.0920641	no	-0.874581	0.0920641	3	3	3	P20	mouse
O70152	Dpm1	dolichol-phosphate (beta-D) mannosyltransferase 1	13480	O70152	P5-P20	0.539061	0.211691	0.718013	no	0.539061	0.718013	2	3	3	P5	mouse
P43277	H1f3	H1.3 linker histone, cluster member	14957	P43277	FB-P5	-3.88939	9.39717e-05	0.00428988	no	-3.88939	0.00428988	3	3	3	P5	mouse
O70152	Dpm1	dolichol-phosphate (beta-D) mannosyltransferase 1	13480	O70152	FB-P20	-1.42562	0.019541	0.0710979	no	-1.42562	0.0710979	2	3	3	P20	mouse
O70194	Eif3d	eukaryotic translation initiation factor 3, subunit D	55944	O70194	FB-P20	-0.942324	0.0158692	0.06266	no	-0.942324	0.06266	3	3	3	P20	mouse
O70194	Eif3d	eukaryotic translation initiation factor 3, subunit D	55944	O70194	FB-P5	-0.651329	0.0611438	0.174956	no	-0.651329	0.174956	3	3	3	P5	mouse
O70194	Eif3d	eukaryotic translation initiation factor 3, subunit D	55944	O70194	P5-P20	-0.290995	0.343882	0.780086	no	-0.290995	0.780086	3	3	3	P20	mouse
O70251	Eef1b2	eukaryotic translation elongation factor 1 beta 2	55949	O70251	FB-P5	-0.586236	0.0372059	0.127995	no	-0.586236	0.127995	3	3	3	P5	mouse
O70251	Eef1b2	eukaryotic translation elongation factor 1 beta 2	55949	O70251	P5-P20	0.272984	0.260714	0.740311	no	0.272984	0.740311	3	3	3	P5	mouse
O70251	Eef1b2	eukaryotic translation elongation factor 1 beta 2	55949	O70251	FB-P20	-0.313252	0.204099	0.352372	no	-0.313252	0.352372	3	3	3	P20	mouse
O70252	Hmox2	heme oxygenase 2	15369	O70252	FB-P5	-0.823016	0.497114	0.659152	no	-0.823016	0.659152	3	3	1	P5	mouse
O70252	Hmox2	heme oxygenase 2	15369	O70252	P5-P20	-0.176734	0.880489	0.982129	no	-0.176734	0.982129	3	3	1	P20	mouse
O70252	Hmox2	heme oxygenase 2	15369	O70252	FB-P20	-0.999751	0.269236	0.418112	no	-0.999751	0.418112	3	3	1	P20	mouse
Q9JKF1	Iqgap1	IQ motif containing GTPase activating protein 1	29875	Q9JKF1	FB-P5	-3.86356	6.68934e-05	0.00349792	no	-3.86356	0.00349792	3	3	3	P5	mouse
Q9DCA5	Brix1	BRX1, biogenesis of ribosomes	67832	Q9DCA5	FB-P20	-4.07348	0.000663286	0.00967734	no	-4.07348	0.00967734	3	3	3	P20	mouse
O70305	Atxn2	ataxin 2	20239	O70305	P5-P20	-0.384033	0.581198	0.908317	no	-0.384033	0.908317	3	3	3	P20	mouse
O70309	Itgb5	integrin beta 5	16419	O70309	P5-P20	-0.1386	0.843862	0.97646	no	-0.1386	0.97646	2	3	3	P20	mouse
O70309	Itgb5	integrin beta 5	16419	O70309	FB-P20	-1.06125	0.214689	0.362318	no	-1.06125	0.362318	2	3	3	P20	mouse
O70309	Itgb5	integrin beta 5	16419	O70309	FB-P5	-0.92265	0.271686	0.453669	no	-0.92265	0.453669	2	3	3	P5	mouse
O70310	Nmt1	N-myristoyltransferase 1	18107	O70310	P5-P20	0.617634	0.401127	0.81895	no	0.617634	0.81895	3	3	3	P5	mouse
O70310	Nmt1	N-myristoyltransferase 1	18107	O70310	FB-P20	-1.22583	0.123142	0.247471	no	-1.22583	0.247471	3	3	3	P20	mouse
O70310	Nmt1	N-myristoyltransferase 1	18107	O70310	FB-P5	-1.84346	0.0357473	0.125072	no	-1.84346	0.125072	3	3	3	P5	mouse
O70318	Epb41l2	erythrocyte membrane protein band 4.1 like 2	13822	O70318	P5-P20	-0.340277	0.342175	0.780086	no	-0.340277	0.780086	3	3	3	P20	mouse
Q9D8Y0	Q9D8Y0			Q9D8Y0	FB-P5	-3.81733	0.000154933	0.00571265	no	-3.81733	0.00571265	3	3	3	P5	mouse
Q61686	Cbx5	chromobox 5	12419	Q61686	FB-P20	-4.05915	0.00648905	0.0360896	no	-4.05915	0.0360896	2	3	3	P20	mouse
O70325	Gpx4	glutathione peroxidase 4	625249	O70325	P5-P20	-0.447334	0.635118	0.925985	no	-0.447334	0.925985	3	3	3	P20	mouse
O70325	Gpx4	glutathione peroxidase 4	625249	O70325	FB-P20	0.295026	0.75296	0.840521	no	0.295026	0.840521	3	3	3	FB	mouse
O70325	Gpx4	glutathione peroxidase 4	625249	O70325	FB-P5	0.742361	0.438746	0.613135	no	0.742361	0.613135	3	3	3	FB	mouse
Q8C1B1	Camsap2	calmodulin regulated spectrin-associated protein family, member 2	67886	Q8C1B1	P5-P20	#NUM!		0	yes	3.10165	0.0226063	1	0	2	P5	mouse
Q3TVC7	Ccndbp1	cyclin D-type binding-protein 1	17151	Q3TVC7	FB-P5	#NUM!		0	yes	-4.20971	0.0177778	0	2	2	P5	mouse
O70333	Cript	cysteine-rich PDZ-binding protein	56724	O70333	FB-P20	1.31553	0.121068	0.24482	no	1.31553	0.24482	2	2	0	FB	mouse
O70378	Emc8	ER membrane protein complex subunit 8	18117	O70378	P5-P20	-0.303098	0.638969	0.927625	no	-0.303098	0.927625	2	3	3	P20	mouse
O70378	Emc8	ER membrane protein complex subunit 8	18117	O70378	FB-P5	-0.577643	0.433847	0.608359	no	-0.577643	0.608359	2	3	3	P5	mouse
O70378	Emc8	ER membrane protein complex subunit 8	18117	O70378	FB-P20	-0.880742	0.251299	0.399613	no	-0.880742	0.399613	2	3	3	P20	mouse
O70400	Pdlim1	PDZ and LIM domain 1 (elfin)	54132	O70400	FB-P5	-1.02871	0.0645933	0.181092	no	-1.02871	0.181092	3	3	3	P5	mouse
O70400	Pdlim1	PDZ and LIM domain 1 (elfin)	54132	O70400	FB-P20	-1.36778	0.0238775	0.0809179	no	-1.36778	0.0809179	3	3	3	P20	mouse
O70400	Pdlim1	PDZ and LIM domain 1 (elfin)	54132	O70400	P5-P20	-0.339067	0.484567	0.860532	no	-0.339067	0.860532	3	3	3	P20	mouse
O70401	O70401			O70401	FB-P20	-1.76347	0.385905	0.530915	no	-1.76347	0.530915	1	3	2	P20	mouse
O70401	O70401			O70401	FB-P5	-1.20961	0.559369	0.70901	no	-1.20961	0.70901	1	3	2	P5	mouse
O70401	O70401			O70401	P5-P20	-0.553863	0.714475	0.948725	no	-0.553863	0.948725	1	3	2	P20	mouse
O70404	Vamp8	vesicle-associated membrane protein 8	22320	O70404	P5-P20	-0.704552	0.136675	0.645025	no	-0.704552	0.645025	3	3	3	P20	mouse
Q3UHD6	Snx27	sorting nexin family member 27	76742	Q3UHD6	FB-P20	-4.03848	0.00320075	0.0231757	no	-4.03848	0.0231757	1	3	3	P20	mouse
O70404	Vamp8	vesicle-associated membrane protein 8	22320	O70404	FB-P5	-1.45404	0.0121489	0.0644652	no	-1.45404	0.0644652	3	3	3	P5	mouse
Q8K3W3	Casc3	cancer susceptibility candidate 3	192160	Q8K3W3	FB-P5	#NUM!		0	yes	-4.5473	0.0182504	0	2	2	P5	mouse
O70405	Ulk1	unc-51 like kinase 1	22241	O70405	P5-P20	-0.272738	0.853466	0.9781	no	-0.272738	0.9781	0	2	1	P20	mouse
O70422	Gtf2h4	general transcription factor II H, polypeptide 4	14885	O70422	FB-P20	1.14533	0.0485529	0.132757	no	1.14533	0.132757	2	3	1	FB	mouse
O70422	Gtf2h4	general transcription factor II H, polypeptide 4	14885	O70422	P5-P20	0.525425	0.327146	0.776139	no	0.525425	0.776139	2	3	1	P5	mouse
O70422	Gtf2h4	general transcription factor II H, polypeptide 4	14885	O70422	FB-P5	0.61991	0.28466	0.465424	no	0.61991	0.465424	2	3	1	FB	mouse
P70677	Casp3	caspase 3	12367	P70677	FB-P5	#NUM!		0	yes	-4.55147	0.0147421	0	1	2	P5	mouse
O70433	Fhl2	four and a half LIM domains 2	14200	O70433	P5-P20	-1.60089	0.0381545	0.49306	no	-1.60089	0.49306	0	3	2	P20	mouse
Q8VHX6	Flnc	filamin C, gamma	68794	Q8VHX6	FB-P5	#NUM!		0	yes	-4.55333	0.011489	0	2	2	P5	mouse
O70435	Psma3	proteasome subunit alpha 3	19167	O70435	P5-P20	0.917019	0.0365038	0.486599	no	0.917019	0.486599	3	3	3	P5	mouse
O70435	Psma3	proteasome subunit alpha 3	19167	O70435	FB-P20	-0.467232	0.220973	0.369937	no	-0.467232	0.369937	3	3	3	P20	mouse
Q6P8X1	Snx6	sorting nexin 6	72183	Q6P8X1	FB-P5	-3.81064	7.37806e-05	0.0037465	no	-3.81064	0.0037465	3	3	3	P5	mouse
O70439	O70439			O70439	P5-P20	-0.937404	0.43823	0.833783	no	-0.937404	0.833783	2	3	3	P20	mouse
O70439	O70439			O70439	FB-P5	1.06422	0.431642	0.606154	no	1.06422	0.606154	2	3	3	FB	mouse
O70439	O70439			O70439	FB-P20	0.126816	0.922815	0.957261	no	0.126816	0.957261	2	3	3	FB	mouse
O70456	Sfn	stratifin	55948	O70456	FB-P5	-0.549243	0.247688	0.428096	no	-0.549243	0.428096	3	3	3	P5	mouse
O70456	Sfn	stratifin	55948	O70456	P5-P20	-0.123087	0.783816	0.961316	no	-0.123087	0.961316	3	3	3	P20	mouse
O70456	Sfn	stratifin	55948	O70456	FB-P20	-0.67233	0.168092	0.306558	no	-0.67233	0.306558	3	3	3	P20	mouse
O70475	Ugdh	UDP-glucose dehydrogenase	22235	O70475	FB-P20	-1.08534	0.0987286	0.212143	no	-1.08534	0.212143	3	3	3	P20	mouse
O70475	Ugdh	UDP-glucose dehydrogenase	22235	O70475	P5-P20	0.259236	0.657423	0.929012	no	0.259236	0.929012	3	3	3	P5	mouse
O70475	Ugdh	UDP-glucose dehydrogenase	22235	O70475	FB-P5	-1.34457	0.0519515	0.157111	no	-1.34457	0.157111	3	3	3	P5	mouse
O70492	O70492			O70492	FB-P5	-0.90025	0.306509	0.487297	no	-0.90025	0.487297	3	3	3	P5	mouse
O70492	O70492			O70492	P5-P20	0.461977	0.587158	0.910715	no	0.461977	0.910715	3	3	3	P5	mouse
O70492	O70492			O70492	FB-P20	-0.438273	0.606017	0.726523	no	-0.438273	0.726523	3	3	3	P20	mouse
O70493	Snx12	sorting nexin 12	55988	O70493	P5-P20	0.377333	0.643594	0.929012	no	0.377333	0.929012	3	3	3	P5	mouse
O70493	Snx12	sorting nexin 12	55988	O70493	FB-P5	-0.294084	0.717392	0.825288	no	-0.294084	0.825288	3	3	3	P5	mouse
O70493	Snx12	sorting nexin 12	55988	O70493	FB-P20	0.0832482	0.917954	0.954959	no	0.0832482	0.954959	3	3	3	FB	mouse
O70494	Sp3	trans-acting transcription factor 3	20687	O70494	FB-P20	0.45531	0.254558	0.40282	no	0.45531	0.40282	3	3	3	FB	mouse
O70494	Sp3	trans-acting transcription factor 3	20687	O70494	FB-P5	0.23862	0.533643	0.689469	no	0.23862	0.689469	3	3	3	FB	mouse
O70494	Sp3	trans-acting transcription factor 3	20687	O70494	P5-P20	0.216691	0.570758	0.902322	no	0.216691	0.902322	3	3	3	P5	mouse
O70503	Hsd17b12	hydroxysteroid (17-beta) dehydrogenase 12	56348	O70503	P5-P20	1.11754	0.217879	0.718904	no	1.11754	0.718904	2	3	3	P5	mouse
O70503	Hsd17b12	hydroxysteroid (17-beta) dehydrogenase 12	56348	O70503	FB-P20	-1.51977	0.147222	0.279453	no	-1.51977	0.279453	2	3	3	P20	mouse
O70503	Hsd17b12	hydroxysteroid (17-beta) dehydrogenase 12	56348	O70503	FB-P5	-2.63731	0.0310091	0.115751	no	-2.63731	0.115751	2	3	3	P5	mouse
O70546	Kdm6a	lysine (K)-specific demethylase 6A	22289	O70546	FB-P5	-0.512856	0.550197	0.702026	no	-0.512856	0.702026	1	2	3	P5	mouse
O70546	Kdm6a	lysine (K)-specific demethylase 6A	22289	O70546	P5-P20	-0.690894	0.335776	0.780086	no	-0.690894	0.780086	1	2	3	P20	mouse
O70546	Kdm6a	lysine (K)-specific demethylase 6A	22289	O70546	FB-P20	-1.20375	0.234185	0.38326	no	-1.20375	0.38326	1	2	3	P20	mouse
O70551	Srpk1	serine/arginine-rich protein specific kinase 1	20815	O70551	P5-P20	-0.0126028	0.977026	0.997073	no	-0.0126028	0.997073	3	3	3	P20	mouse
O70551	Srpk1	serine/arginine-rich protein specific kinase 1	20815	O70551	FB-P20	-1.08736	0.0412134	0.118835	no	-1.08736	0.118835	3	3	3	P20	mouse
O70551	Srpk1	serine/arginine-rich protein specific kinase 1	20815	O70551	FB-P5	-1.07476	0.0429113	0.141024	no	-1.07476	0.141024	3	3	3	P5	mouse
O70591	Pfdn2	prefoldin 2	18637	O70591	P5-P20	0.328569	0.687563	0.939228	no	0.328569	0.939228	3	3	3	P5	mouse
O70591	Pfdn2	prefoldin 2	18637	O70591	FB-P5	-1.71439	0.0698002	0.187964	no	-1.71439	0.187964	3	3	3	P5	mouse
O70591	Pfdn2	prefoldin 2	18637	O70591	FB-P20	-1.38582	0.125221	0.249587	no	-1.38582	0.249587	3	3	3	P20	mouse
O88271	Cfdp1	craniofacial development protein 1	23837	O88271	FB-P5	-0.946359	0.0477167	0.149037	no	-0.946359	0.149037	3	3	3	P5	mouse
O88271	Cfdp1	craniofacial development protein 1	23837	O88271	P5-P20	-0.489045	0.247055	0.728988	no	-0.489045	0.728988	3	3	3	P20	mouse
Q04736	Yes1	YES proto-oncogene 1, Src family tyrosine kinase	22612	Q04736	FB-P20	-3.98346	2.38849e-05	0.0014829	no	-3.98346	0.0014829	1	3	3	P20	mouse
O88273	Grem2	gremlin 2, DAN family BMP antagonist	23893	O88273	P5-P20	0.0358728	0.894236	0.982945	no	0.0358728	0.982945	0	1	2	P5	mouse
O88273	Grem2	gremlin 2, DAN family BMP antagonist	23893	O88273	FB-P5	#NUM!		0	yes	-4.56024	0.0223819	0	1	2	P5	mouse
O88286	Wiz	widely-interspaced zinc finger motifs	22404	O88286	FB-P20	-1.22209	0.247616	0.395914	no	-1.22209	0.395914	1	3	3	P20	mouse
O88286	Wiz	widely-interspaced zinc finger motifs	22404	O88286	P5-P20	-0.886662	0.237517	0.722675	no	-0.886662	0.722675	1	3	3	P20	mouse
O88286	Wiz	widely-interspaced zinc finger motifs	22404	O88286	FB-P5	-0.335431	0.729295	0.834641	no	-0.335431	0.834641	1	3	3	P5	mouse
Q9CQV7	Dnajc19	DnaJ heat shock protein family (Hsp40) member C19	67713	Q9CQV7	FB-P5	#NUM!		0	yes	-4.58661	0.0300646	0	2	2	P5	mouse
Q6NZM9	Hdac4	histone deacetylase 4	208727	Q6NZM9	FB-P5	#NUM!		0	yes	-4.61635	0.0222072	0	1	2	P5	mouse
O88291	Zfp326	zinc finger protein 326	54367	O88291	P5-P20	-1.60564	0.0478573	0.520081	no	-1.60564	0.520081	0	3	3	P20	mouse
P39689	Cdkn1a	cyclin-dependent kinase inhibitor 1A (P21)	12575	P39689	FB-P5	#NUM!		0	yes	-4.72012	0.0409719	0	1	2	P5	mouse
O88322	Nid2	nidogen 2	18074	O88322	P5-P20	-0.883414	0.571643	0.902658	no	-0.883414	0.902658	0	3	2	P20	mouse
P18052	Ptpra	protein tyrosine phosphatase, receptor type, A	19262	P18052	FB-P5	#NUM!		0	yes	-4.80959	0.040531	0	1	2	P5	mouse
O88342	Wdr1	WD repeat domain 1	22388	O88342	P5-P20	0.225925	0.308818	0.765524	no	0.225925	0.765524	3	3	3	P5	mouse
O88342	Wdr1	WD repeat domain 1	22388	O88342	FB-P20	-0.931268	0.00376082	0.0255796	no	-0.931268	0.0255796	3	3	3	P20	mouse
Q9CZN7	Shmt2	serine hydroxymethyltransferase 2 (mitochondrial)	108037	Q9CZN7	FB-P5	-3.75396	0.00210099	0.0227921	no	-3.75396	0.0227921	2	3	3	P5	mouse
O88379	O88379			O88379	FB-P5	-1.58114	0.0309163	0.11564	no	-1.58114	0.11564	2	3	2	P5	mouse
O88379	O88379			O88379	P5-P20	-1.45353	0.0302552	0.450126	no	-1.45353	0.450126	2	3	2	P20	mouse
Q8VD75	Hip1	huntingtin interacting protein 1	215114	Q8VD75	FB-P20	-3.98079	0.000808673	0.0106774	no	-3.98079	0.0106774	3	3	3	P20	mouse
Q8BU00	Ikzf5	IKAROS family zinc finger 5	67143	Q8BU00	FB-P5	#NUM!		0	yes	-4.83542	0.0198858	0	2	2	P5	mouse
O35495	Cdk14	cyclin-dependent kinase 14	18647	O35495	FB-P5	#NUM!		0	yes	-4.84136	0.0227558	0	2	2	P5	mouse
O88413	Tulp3	tubby-like protein 3	22158	O88413	P5-P20	-1.19161	0.0594859	0.538912	no	-1.19161	0.538912	0	3	3	P20	mouse
O88441	Mtx2	metaxin 2	53375	O88441	P5-P20	-1.55996	0.343854	0.780086	no	-1.55996	0.780086	3	2	3	P20	mouse
O88441	Mtx2	metaxin 2	53375	O88441	FB-P20	0.673149	0.670895	0.77778	no	0.673149	0.77778	3	2	3	FB	mouse
O88441	Mtx2	metaxin 2	53375	O88441	FB-P5	2.23311	0.155258	0.314673	no	2.23311	0.314673	3	2	3	FB	mouse
O88448	O88448			O88448	P5-P20	-0.826454	0.0564298	0.527626	no	-0.826454	0.527626	0	3	3	P20	mouse
Q8K3A9	Mepce	methylphosphate capping enzyme	231803	Q8K3A9	FB-P5	#NUM!		0	yes	-4.97385	0.0456222	0	2	2	P5	mouse
Q99LB2	Dhrs4	dehydrogenase/reductase (SDR family) member 4	28200	Q99LB2	FB-P5	#NUM!		0	yes	-4.9885	0.0178783	0	3	2	P5	mouse
O88455	Dhcr7	7-dehydrocholesterol reductase	13360	O88455	FB-P5	-0.426602	0.38017	0.558983	no	-0.426602	0.558983	3	3	3	P5	mouse
O88455	Dhcr7	7-dehydrocholesterol reductase	13360	O88455	P5-P20	-0.630843	0.210904	0.717576	no	-0.630843	0.717576	3	3	3	P20	mouse
O88455	Dhcr7	7-dehydrocholesterol reductase	13360	O88455	FB-P20	-1.05745	0.0572501	0.146457	no	-1.05745	0.146457	3	3	3	P20	mouse
O88456	Capns1	calpain, small subunit 1	12336	O88456	FB-P5	-0.3686	0.602872	0.740966	no	-0.3686	0.740966	3	3	3	P5	mouse
O88456	Capns1	calpain, small subunit 1	12336	O88456	P5-P20	-0.461456	0.517621	0.873621	no	-0.461456	0.873621	3	3	3	P20	mouse
O88456	Capns1	calpain, small subunit 1	12336	O88456	FB-P20	-0.830055	0.262607	0.410437	no	-0.830055	0.410437	3	3	3	P20	mouse
O88477	Igf2bp1	insulin-like growth factor 2 mRNA binding protein 1	140486	O88477	P5-P20	-0.116388	0.580447	0.907973	no	-0.116388	0.907973	3	3	3	P20	mouse
P25976	P25976			P25976	FB-P20	-3.98054	0.000863225	0.0111315	no	-3.98054	0.0111315	3	3	3	P20	mouse
P11404	Fabp3	fatty acid binding protein 3, muscle and heart	14077	P11404	FB-P5	-3.71275	0.00109181	0.0165317	no	-3.71275	0.0165317	3	3	3	P5	mouse
O88487	Dync1i2	dynein cytoplasmic 1 intermediate chain 2	13427	O88487	P5-P20	-0.588166	0.401281	0.81895	no	-0.588166	0.81895	3	3	3	P20	mouse
O88487	Dync1i2	dynein cytoplasmic 1 intermediate chain 2	13427	O88487	FB-P5	0.176621	0.795334	0.8774	no	0.176621	0.8774	3	3	3	FB	mouse
O88487	Dync1i2	dynein cytoplasmic 1 intermediate chain 2	13427	O88487	FB-P20	-0.411545	0.550756	0.680977	no	-0.411545	0.680977	3	3	3	P20	mouse
O88491	O88491			O88491	P5-P20	-0.477977	0.190265	0.690167	no	-0.477977	0.690167	1	3	3	P20	mouse
Q9CYN2	Spcs2	signal peptidase complex subunit 2 homolog (S. cerevisiae)	66624	Q9CYN2	FB-P20	-3.96744	0.000516536	0.00889739	no	-3.96744	0.00889739	1	3	2	P20	mouse
O88491	O88491			O88491	FB-P5	-1.95199	0.0104208	0.0583078	no	-1.95199	0.0583078	1	3	3	P5	mouse
Q6PAT0	Adat3	adenosine deaminase, tRNA-specific 3	100113398	Q6PAT0	FB-P5	#NUM!		0	yes	-5.01901	0.0407831	0	3	2	P5	mouse
O88508	Dnmt3a	DNA methyltransferase 3A	13435	O88508	P5-P20	-0.351608	0.724747	0.951631	no	-0.351608	0.951631	0	2	3	P20	mouse
Q9CQV4	Retreg3	reticulophagy regulator family member 3	67998	Q9CQV4	P5-P20	#NUM!		0	yes	-5.06929	0.0153355	0	2	0	P20	mouse
O88509	Dnmt3b	DNA methyltransferase 3B	13436	O88509	P5-P20	-1.97646	0.102892	0.610566	no	-1.97646	0.610566	1	2	3	P20	mouse
O88509	Dnmt3b	DNA methyltransferase 3B	13436	O88509	FB-P20	-2.77792	0.0931154	0.203612	no	-2.77792	0.203612	1	2	3	P20	mouse
O88509	Dnmt3b	DNA methyltransferase 3B	13436	O88509	FB-P5	-0.80146	0.510642	0.670903	no	-0.80146	0.670903	1	2	3	P5	mouse
Q64311	Ntan1	N-terminal Asn amidase	18203	Q64311	FB-P5	#NUM!		0	yes	-5.09804	0.0396716	0	2	2	P5	mouse
O88531	Ppt1	palmitoyl-protein thioesterase 1	19063	O88531	FB-P5	0.920092	0.4895	0.653014	no	0.920092	0.653014	2	0	1	FB	mouse
P39749	P39749			P39749	FB-P5	-3.69587	0.00658504	0.043537	no	-3.69587	0.043537	3	3	3	P5	mouse
Q9JKF1	Iqgap1	IQ motif containing GTPase activating protein 1	29875	Q9JKF1	FB-P20	-3.9154	6.20063e-05	0.00262224	no	-3.9154	0.00262224	3	3	3	P20	mouse
O88532	Zfr	zinc finger RNA binding protein	22763	O88532	P5-P20	-0.136407	0.500994	0.866945	no	-0.136407	0.866945	3	3	3	P20	mouse
O88543	Cops3	COP9 signalosome subunit 3	26572	O88543	FB-P20	0.809482	0.245882	0.395037	no	0.809482	0.395037	3	3	3	FB	mouse
O88543	Cops3	COP9 signalosome subunit 3	26572	O88543	FB-P5	1.10365	0.13012	0.280319	no	1.10365	0.280319	3	3	3	FB	mouse
O88543	Cops3	COP9 signalosome subunit 3	26572	O88543	P5-P20	-0.294171	0.656778	0.929012	no	-0.294171	0.929012	3	3	3	P20	mouse
O88544	Cops4	COP9 signalosome subunit 4	26891	O88544	P5-P20	0.267162	0.743688	0.956906	no	0.267162	0.956906	3	3	3	P5	mouse
O88544	Cops4	COP9 signalosome subunit 4	26891	O88544	FB-P5	0.742469	0.377993	0.556634	no	0.742469	0.556634	3	3	3	FB	mouse
O88544	Cops4	COP9 signalosome subunit 4	26891	O88544	FB-P20	1.00963	0.243187	0.393357	no	1.00963	0.393357	3	3	3	FB	mouse
O88545	Cops6	COP9 signalosome subunit 6	26893	O88545	FB-P5	1.01255	0.183292	0.354505	no	1.01255	0.354505	3	2	3	FB	mouse
O88545	Cops6	COP9 signalosome subunit 6	26893	O88545	FB-P20	1.65672	0.0734217	0.173477	no	1.65672	0.173477	3	2	3	FB	mouse
O88545	Cops6	COP9 signalosome subunit 6	26893	O88545	P5-P20	0.644166	0.419909	0.825147	no	0.644166	0.825147	3	2	3	P5	mouse
Q8VC56	Rnf8	ring finger protein 8	58230	Q8VC56	P5-P20	#NUM!		0	yes	-5.10956	0.018233	0	2	0	P20	mouse
O88559	Men1	multiple endocrine neoplasia 1	17283	O88559	P5-P20	-0.342933	0.82357	0.974739	no	-0.342933	0.974739	0	3	1	P20	mouse
O88569	Hnrnpa2b1	heterogeneous nuclear ribonucleoprotein A2/B1	53379	O88569	FB-P5	-0.727849	0.0452317	0.145431	no	-0.727849	0.145431	3	3	3	P5	mouse
O88569	Hnrnpa2b1	heterogeneous nuclear ribonucleoprotein A2/B1	53379	O88569	P5-P20	0.447484	0.172151	0.684914	no	0.447484	0.684914	3	3	3	P5	mouse
O88569	Hnrnpa2b1	heterogeneous nuclear ribonucleoprotein A2/B1	53379	O88569	FB-P20	-0.280365	0.369027	0.515226	no	-0.280365	0.515226	3	3	3	P20	mouse
Q9Z248	Aebp2	AE binding protein 2	11569	Q9Z248	FB-P5	#NUM!		0	yes	-5.182	0.0369776	0	2	2	P5	mouse
Q60866	Pter	phosphotriesterase related	19212	Q60866	P5-P20	#NUM!		0	yes	-5.2213	0.0261598	1	2	0	P20	mouse
O88597	Becn1	beclin 1, autophagy related	56208	O88597	P5-P20	-0.631091	0.0439533	0.505887	no	-0.631091	0.505887	0	3	2	P20	mouse
O88622	O88622			O88622	FB-P20	-3.32326	0.0436488	0.123907	no	-3.32326	0.123907	1	3	3	P20	mouse
O88622	O88622			O88622	P5-P20	-1.1113	0.240694	0.724864	no	-1.1113	0.724864	1	3	3	P20	mouse
O88622	O88622			O88622	FB-P5	-2.21195	0.124758	0.272441	no	-2.21195	0.272441	1	3	3	P5	mouse
Q8C3Y4	Kntc1	kinetochore associated 1	208628	Q8C3Y4	P5-P20	#NUM!		0	yes	-5.24118	0.024276	1	2	0	P20	mouse
O88630	Gosr1	golgi SNAP receptor complex member 1	53334	O88630	P5-P20	-1.71164	0.416168	0.821858	no	-1.71164	0.821858	0	2	2	P20	mouse
Q6PDL0	Dync1li2	dynein, cytoplasmic 1 light intermediate chain 2	234663	Q6PDL0	FB-P5	#NUM!		0	yes	-5.25648	0.0395256	0	3	2	P5	mouse
O88653	Lamtor3	late endosomal/lysosomal adaptor, MAPK and MTOR activator 3	56692	O88653	FB-P5	2.48835	0.175581	0.343067	no	2.48835	0.343067	3	0	1	FB	mouse
Q8BQR4	Kansl2	KAT8 regulatory NSL complex subunit 2	69612	Q8BQR4	FB-P5	#NUM!		0	yes	-5.26841	0.0491901	0	1	2	P5	mouse
O35609	Scamp3	secretory carrier membrane protein 3	24045	O35609	FB-P5	#NUM!		0	yes	-5.29751	0.0314514	0	2	2	P5	mouse
Q61214	Dyrk1a	dual-specificity tyrosine-(Y)-phosphorylation regulated kinase 1a	13548	Q61214	FB-P5	#NUM!		0	yes	-5.31389	0.035149	0	2	2	P5	mouse
O88665	Brd7	bromodomain containing 7	26992	O88665	P5-P20	0.0115473	0.989077	0.998423	no	0.0115473	0.998423	0	2	3	P5	mouse
O88685	Psmc3	proteasome (prosome, macropain) 26S subunit, ATPase 3	19182	O88685	FB-P5	-0.714218	0.00652307	0.0433264	no	-0.714218	0.0433264	3	3	3	P5	mouse
O88685	Psmc3	proteasome (prosome, macropain) 26S subunit, ATPase 3	19182	O88685	FB-P20	-0.741758	0.00547377	0.0325305	no	-0.741758	0.0325305	3	3	3	P20	mouse
O88685	Psmc3	proteasome (prosome, macropain) 26S subunit, ATPase 3	19182	O88685	P5-P20	-0.0275396	0.880236	0.982129	no	-0.0275396	0.982129	3	3	3	P20	mouse
O88696	Clpp	caseinolytic mitochondrial matrix peptidase proteolytic subunit	53895	O88696	FB-P5	-1.2546	0.177404	0.345674	no	-1.2546	0.345674	3	3	3	P5	mouse
O88696	Clpp	caseinolytic mitochondrial matrix peptidase proteolytic subunit	53895	O88696	FB-P20	-1.98614	0.0519505	0.137355	no	-1.98614	0.137355	3	3	3	P20	mouse
O88696	Clpp	caseinolytic mitochondrial matrix peptidase proteolytic subunit	53895	O88696	P5-P20	-0.731545	0.407291	0.820098	no	-0.731545	0.820098	3	3	3	P20	mouse
Q9JJZ4	Ube2j1	ubiquitin-conjugating enzyme E2J 1	56228	Q9JJZ4	FB-P5	#NUM!		0	yes	-5.33648	0.0398373	0	2	2	P5	mouse
O88700	Blm	Bloom syndrome, RecQ like helicase	12144	O88700	P5-P20	-0.407984	0.471024	0.855401	no	-0.407984	0.855401	0	2	1	P20	mouse
O88708	Orc4	origin recognition complex, subunit 4	26428	O88708	FB-P5	-0.0906225	0.914855	0.954074	no	-0.0906225	0.954074	1	3	3	P5	mouse
O88708	Orc4	origin recognition complex, subunit 4	26428	O88708	P5-P20	0.2784	0.646844	0.929012	no	0.2784	0.929012	1	3	3	P5	mouse
O88708	Orc4	origin recognition complex, subunit 4	26428	O88708	FB-P20	0.187777	0.825118	0.895053	no	0.187777	0.895053	1	3	3	FB	mouse
O88712	Ctbp1	C-terminal binding protein 1	13016	O88712	P5-P20	0.117379	0.95031	0.990855	no	0.117379	0.990855	0	3	1	P5	mouse
Q9CYD3	Crtap	cartilage associated protein	56693	Q9CYD3	FB-P5	#NUM!		0	yes	-5.36022	0.0279383	0	3	2	P5	mouse
O88735	Map7	microtubule-associated protein 7	17761	O88735	FB-P20	-1.91211	0.0347425	0.105478	no	-1.91211	0.105478	3	3	3	P20	mouse
O88735	Map7	microtubule-associated protein 7	17761	O88735	P5-P20	-0.0649295	0.929473	0.989186	no	-0.0649295	0.989186	3	3	3	P20	mouse
O88735	Map7	microtubule-associated protein 7	17761	O88735	FB-P5	-1.84719	0.0392932	0.132271	no	-1.84719	0.132271	3	3	3	P5	mouse
Q6ZQJ5	Dna2	DNA replication helicase/nuclease 2	327762	Q6ZQJ5	FB-P5	#NUM!		0	yes	-5.36157	0.0268733	0	1	2	P5	mouse
O88736	Hsd17b7	hydroxysteroid (17-beta) dehydrogenase 7	15490	O88736	FB-P20	0.343155	0.806223	0.880448	no	0.343155	0.880448	1	2	0	FB	mouse
O88738	Birc6	baculoviral IAP repeat-containing 6	12211	O88738	P5-P20	-0.468802	0.210893	0.717576	no	-0.468802	0.717576	3	3	3	P20	mouse
P97314	Csrp2	cysteine and glycine-rich protein 2	13008	P97314	FB-P5	-3.60292	0.00381928	0.0318384	no	-3.60292	0.0318384	2	3	3	P5	mouse
Q3U319	Rnf40	ring finger protein 40	233900	Q3U319	FB-P20	-3.87939	0.00287004	0.0218662	no	-3.87939	0.0218662	1	3	3	P20	mouse
O88746	Tom1	target of myb1 trafficking protein	21968	O88746	P5-P20	-0.607244	0.228793	0.721531	no	-0.607244	0.721531	2	3	3	P20	mouse
Q9Z2H5	Epb41l1	erythrocyte membrane protein band 4.1 like 1	13821	Q9Z2H5	FB-P20	-3.87623	0.00670949	0.0366889	no	-3.87623	0.0366889	3	3	3	P20	mouse
O88746	Tom1	target of myb1 trafficking protein	21968	O88746	FB-P5	-1.44063	0.0334544	0.119491	no	-1.44063	0.119491	2	3	3	P5	mouse
O88792	F11r	F11 receptor	16456	O88792	FB-P5	-1.72264	0.0640498	0.180572	no	-1.72264	0.180572	3	3	3	P5	mouse
O88792	F11r	F11 receptor	16456	O88792	P5-P20	-0.924938	0.269477	0.740446	no	-0.924938	0.740446	3	3	3	P20	mouse
O88792	F11r	F11 receptor	16456	O88792	FB-P20	-2.64758	0.0131084	0.055853	no	-2.64758	0.055853	3	3	3	P20	mouse
O88796	Rpp30	ribonuclease P/MRP 30 subunit	54364	O88796	FB-P20	-1.65931	0.313714	0.458396	no	-1.65931	0.458396	2	1	0	P20	mouse
Q9JMB0	Gkap1	G kinase anchoring protein 1	56278	Q9JMB0	FB-P20	#NUM!		0	yes	-5.36469	0.042172	0	2	1	P20	mouse
O70305	Atxn2	ataxin 2	20239	O70305	FB-P20	-3.87155	0.00107567	0.01225	no	-3.87155	0.01225	3	3	3	P20	mouse
O88811	Stam2	signal transducing adaptor molecule (SH3 domain and ITAM motif) 2	56324	O88811	P5-P20	-0.549678	0.159529	0.669478	no	-0.549678	0.669478	3	3	3	P20	mouse
O88811	Stam2	signal transducing adaptor molecule (SH3 domain and ITAM motif) 2	56324	O88811	FB-P5	-1.07781	0.0198685	0.0883182	no	-1.07781	0.0883182	3	3	3	P5	mouse
Q1EHW4	Sap25	sin3 associated polypeptide	751865	Q1EHW4	P5-P20	#NUM!		0	yes	-5.37045	0.0227099	1	2	0	P20	mouse
Q3TVC7	Ccndbp1	cyclin D-type binding-protein 1	17151	Q3TVC7	FB-P20	#NUM!		0	yes	-5.37846	0.0334907	0	2	2	P20	mouse
O88824	Jtb	jumping translocation breakpoint	23922	O88824	P5-P20	-0.434341	0.515343	0.873403	no	-0.434341	0.873403	0	3	2	P20	mouse
O88842	O88842			O88842	P5-P20	-0.297693	0.633135	0.925985	no	-0.297693	0.925985	0	1	2	P20	mouse
P55937	Golga3	golgi autoantigen, golgin subfamily a, 3	269682	P55937	FB-P5	#NUM!		0	yes	-5.38292	0.0120659	0	2	2	P5	mouse
O88844	Idh1	isocitrate dehydrogenase 1 (NADP+), soluble	15926	O88844	FB-P20	-0.816301	0.0948547	0.206024	no	-0.816301	0.206024	3	3	3	P20	mouse
O88844	Idh1	isocitrate dehydrogenase 1 (NADP+), soluble	15926	O88844	P5-P20	0.0139646	0.974061	0.996002	no	0.0139646	0.996002	3	3	3	P5	mouse
O88844	Idh1	isocitrate dehydrogenase 1 (NADP+), soluble	15926	O88844	FB-P5	-0.830266	0.0905026	0.220768	no	-0.830266	0.220768	3	3	3	P5	mouse
O88845	Akap10	A kinase (PRKA) anchor protein 10	56697	O88845	P5-P20	-0.539806	0.745852	0.956906	no	-0.539806	0.956906	0	1	2	P20	mouse
Q99LJ8	Nus1	NUS1 dehydrodolichyl diphosphate synthase subunit	52014	Q99LJ8	FB-P5	#NUM!		0	yes	-5.39455	0.0427714	0	0	2	P5	mouse
Q8C0V0	Tlk1	tousled-like kinase 1	228012	Q8C0V0	FB-P5	#NUM!		0	yes	-5.39627	0.0339732	0	1	2	P5	mouse
O88851	Rbbp9	retinoblastoma binding protein 9, serine hydrolase	26450	O88851	P5-P20	0.168582	0.856909	0.978601	no	0.168582	0.978601	0	1	2	P5	mouse
O35683	Ndufa1	NADH:ubiquinone oxidoreductase subunit A1	54405	O35683	FB-P5	#NUM!		0	yes	-5.41281	0.0327142	0	1	2	P5	mouse
O88874	O88874			O88874	P5-P20	-0.312421	0.794544	0.964154	no	-0.312421	0.964154	0	2	2	P20	mouse
Q60872	Eif1a	eukaryotic translation initiation factor 1A	13664	Q60872	P5-P20	#NUM!		0	yes	-5.43014	0.0348649	1	2	0	P20	mouse
O88879	Apaf1	apoptotic peptidase activating factor 1	11783	O88879	P5-P20	-1.3067	0.216408	0.718522	no	-1.3067	0.718522	1	2	1	P20	mouse
O88879	Apaf1	apoptotic peptidase activating factor 1	11783	O88879	FB-P20	-0.60709	0.414214	0.559055	no	-0.60709	0.559055	1	2	1	P20	mouse
O88952	Lin7c	lin-7 homolog C (C. elegans)	22343	O88952	P5-P20	1.16352	0.0044366	0.249525	no	1.16352	0.249525	1	3	2	P5	mouse
P54103	Dnajc2	DnaJ heat shock protein family (Hsp40) member C2	22791	P54103	FB-P5	-3.49145	0.000196295	0.0059359	no	-3.49145	0.0059359	3	3	3	P5	mouse
O88952	Lin7c	lin-7 homolog C (C. elegans)	22343	O88952	FB-P20	-0.110084	0.601946	0.724321	no	-0.110084	0.724321	1	3	2	P20	mouse
Q3US17	Zfp553	zinc finger protein 553	233887	Q3US17	FB-P5	#NUM!		0	yes	-5.444	0.0290247	0	2	2	P5	mouse
O88958	Gnpda1	glucosamine-6-phosphate deaminase 1	26384	O88958	P5-P20	0.113284	0.953146	0.990855	no	0.113284	0.990855	0	3	1	P5	mouse
O88967	Yme1l1	YME1-like 1 (S. cerevisiae)	27377	O88967	FB-P20	-0.530348	0.150532	0.283937	no	-0.530348	0.283937	3	3	3	P20	mouse
O88967	Yme1l1	YME1-like 1 (S. cerevisiae)	27377	O88967	P5-P20	0.14996	0.657739	0.929012	no	0.14996	0.929012	3	3	3	P5	mouse
O88967	Yme1l1	YME1-like 1 (S. cerevisiae)	27377	O88967	FB-P5	-0.680308	0.0789924	0.202841	no	-0.680308	0.202841	3	3	3	P5	mouse
O88974	O88974			O88974	P5-P20	0.582058	0.329955	0.777974	no	0.582058	0.777974	0	3	2	P5	mouse
Q9CR29	Ccdc43	coiled-coil domain containing 43	52715	Q9CR29	FB-P5	#NUM!		0	yes	-5.44968	0.0243041	0	3	2	P5	mouse
E9Q7D5	Arhgef5	Rho guanine nucleotide exchange factor (GEF) 5	54324	E9Q7D5	FB-P5	#NUM!		0	yes	-5.45192	0.0478621	0	2	2	P5	mouse
O88983	Stx8	syntaxin 8	55943	O88983	P5-P20	-0.412712	0.130508	0.638392	no	-0.412712	0.638392	0	3	3	P20	mouse
Q9CQV4	Retreg3	reticulophagy regulator family member 3	67998	Q9CQV4	FB-P20	#NUM!		0	yes	-5.47302	0.0108917	0	2	0	P20	mouse
P18155	Mthfd2	methylenetetrahydrofolate dehydrogenase (NAD+ dependent), methenyltetrahydrofolate cyclohydrolase	17768	P18155	FB-P5	#NUM!		0	yes	-5.47634	0.0200611	0	2	2	P5	mouse
O88986	Gcat	glycine C-acetyltransferase (2-amino-3-ketobutyrate-coenzyme A ligase)	26912	O88986	FB-P20	-1.39585	0.0512226	0.136625	no	-1.39585	0.136625	3	3	3	P20	mouse
O88986	Gcat	glycine C-acetyltransferase (2-amino-3-ketobutyrate-coenzyme A ligase)	26912	O88986	FB-P5	-0.348263	0.566676	0.713868	no	-0.348263	0.713868	3	3	3	P5	mouse
O88986	Gcat	glycine C-acetyltransferase (2-amino-3-ketobutyrate-coenzyme A ligase)	26912	O88986	P5-P20	-1.04759	0.118117	0.629996	no	-1.04759	0.629996	3	3	3	P20	mouse
O88700	Blm	Bloom syndrome, RecQ like helicase	12144	O88700	FB-P20	#NUM!		0	yes	-5.50344	0.0255155	0	2	1	P20	mouse
Q8VC56	Rnf8	ring finger protein 8	58230	Q8VC56	FB-P20	#NUM!		0	yes	-5.51329	0.0295073	0	2	0	P20	mouse
O89001	Cpd	carboxypeptidase D	12874	O89001	P5-P20	-1.07074	0.138477	0.645899	no	-1.07074	0.645899	0	3	3	P20	mouse
O89023	Tpp1	tripeptidyl peptidase I	12751	O89023	FB-P5	-2.00867	0.0505205	0.154901	no	-2.00867	0.154901	2	3	3	P5	mouse
O89023	Tpp1	tripeptidyl peptidase I	12751	O89023	P5-P20	0.547245	0.470469	0.854812	no	0.547245	0.854812	2	3	3	P5	mouse
O89023	Tpp1	tripeptidyl peptidase I	12751	O89023	FB-P20	-1.46142	0.121339	0.245199	no	-1.46142	0.245199	2	3	3	P20	mouse
O89050	Mkln1	muskelin 1, intracellular mediator containing kelch motifs	27418	O89050	P5-P20	0.489379	0.251491	0.73255	no	0.489379	0.73255	1	3	3	P5	mouse
O89050	Mkln1	muskelin 1, intracellular mediator containing kelch motifs	27418	O89050	FB-P5	-2.13097	0.0145652	0.0712406	no	-2.13097	0.0712406	1	3	3	P5	mouse
O89050	Mkln1	muskelin 1, intracellular mediator containing kelch motifs	27418	O89050	FB-P20	-1.64159	0.0336348	0.103749	no	-1.64159	0.103749	1	3	3	P20	mouse
P70175	Dlg3	discs large MAGUK scaffold protein 3	53310	P70175	FB-P20	#NUM!		0	yes	-5.5308	0.0203617	0	2	1	P20	mouse
O89051	Itm2b	integral membrane protein 2B	16432	O89051	P5-P20	-0.343685	0.0908835	0.591859	no	-0.343685	0.591859	0	2	1	P20	mouse
O89079	Cope	coatomer protein complex, subunit epsilon	59042	O89079	FB-P20	-0.23156	0.629988	0.74546	no	-0.23156	0.74546	3	3	3	P20	mouse
O89079	Cope	coatomer protein complex, subunit epsilon	59042	O89079	FB-P5	-0.396337	0.41853	0.595311	no	-0.396337	0.595311	3	3	3	P5	mouse
O89079	Cope	coatomer protein complex, subunit epsilon	59042	O89079	P5-P20	0.164777	0.730431	0.953983	no	0.164777	0.953983	3	3	3	P5	mouse
O89086	Rbm3	RNA binding motif (RNP1, RRM) protein 3	19652	O89086	P5-P20	-0.0741602	0.625447	0.923001	no	-0.0741602	0.923001	3	3	3	P20	mouse
O89086	Rbm3	RNA binding motif (RNP1, RRM) protein 3	19652	O89086	FB-P5	-0.716699	0.00252675	0.0253204	no	-0.716699	0.0253204	3	3	3	P5	mouse
O89086	Rbm3	RNA binding motif (RNP1, RRM) protein 3	19652	O89086	FB-P20	-0.79086	0.00153721	0.0150019	no	-0.79086	0.0150019	3	3	3	P20	mouse
O89090	Sp1	trans-acting transcription factor 1	20683	O89090	P5-P20	-1.23199	0.0398901	0.496886	no	-1.23199	0.496886	2	3	3	P20	mouse
O89090	Sp1	trans-acting transcription factor 1	20683	O89090	FB-P5	-1.5643	0.0258647	0.104623	no	-1.5643	0.104623	2	3	3	P5	mouse
Q9DC51	Gnai3	guanine nucleotide binding protein (G protein), alpha inhibiting 3	14679	Q9DC51	FB-P20	-3.868	0.000524251	0.00889739	no	-3.868	0.00889739	3	3	3	P20	mouse
O89112	Lancl1	LanC (bacterial lantibiotic synthetase component C)-like 1	14768	O89112	P5-P20	-0.783454	0.802589	0.969164	no	-0.783454	0.969164	3	1	2	P20	mouse
O89112	Lancl1	LanC (bacterial lantibiotic synthetase component C)-like 1	14768	O89112	FB-P20	0.97351	0.742859	0.832755	no	0.97351	0.832755	3	1	2	FB	mouse
O89112	Lancl1	LanC (bacterial lantibiotic synthetase component C)-like 1	14768	O89112	FB-P5	1.75696	0.471665	0.639218	no	1.75696	0.639218	3	1	2	FB	mouse
P00329	Adh1	alcohol dehydrogenase 1 (class I)	11522	P00329	P5-P20	-0.482839	0.315458	0.767647	no	-0.482839	0.767647	2	3	3	P20	mouse
Q9DBR7	Ppp1r12a	protein phosphatase 1, regulatory subunit 12A	17931	Q9DBR7	FB-P20	-3.86225	2.6589e-05	0.00156873	no	-3.86225	0.00156873	3	3	3	P20	mouse
O70305	Atxn2	ataxin 2	20239	O70305	FB-P5	-3.48751	0.00184146	0.0214414	no	-3.48751	0.0214414	3	3	3	P5	mouse
P00342	Ldhc	lactate dehydrogenase C	16833	P00342	P5-P20	0.608262	0.434102	0.831605	no	0.608262	0.831605	3	3	3	P5	mouse
P00342	Ldhc	lactate dehydrogenase C	16833	P00342	FB-P5	2.4007	0.0162512	0.0766204	no	2.4007	0.0766204	3	3	3	FB	mouse
Q811D0	Dlg1	discs large MAGUK scaffold protein 1	13383	Q811D0	FB-P20	-3.85112	0.00153244	0.0150019	no	-3.85112	0.0150019	3	3	3	P20	mouse
P00375	Dhfr	dihydrofolate reductase	13361	P00375	FB-P20	1.2857	0.0825466	0.187584	no	1.2857	0.187584	3	3	3	FB	mouse
P00375	Dhfr	dihydrofolate reductase	13361	P00375	P5-P20	0.984924	0.161898	0.669485	no	0.984924	0.669485	3	3	3	P5	mouse
P00375	Dhfr	dihydrofolate reductase	13361	P00375	FB-P5	0.300778	0.643549	0.771508	no	0.300778	0.771508	3	3	3	FB	mouse
Q9DBG7	Srpr	signal recognition particle receptor ('docking protein')	67398	Q9DBG7	FB-P5	-3.47419	0.000689246	0.0124671	no	-3.47419	0.0124671	3	3	3	P5	mouse
P00405	COX2	cytochrome c oxidase subunit II	17709	P00405	FB-P20	0.896052	0.0178691	0.067107	no	0.896052	0.067107	3	3	3	FB	mouse
P00405	COX2	cytochrome c oxidase subunit II	17709	P00405	P5-P20	-1.53259	0.00147637	0.224074	no	-1.53259	0.224074	3	3	3	P20	mouse
P00493	Hprt	hypoxanthine guanine phosphoribosyl transferase	15452	P00493	P5-P20	0.456832	0.145858	0.653231	no	0.456832	0.653231	3	3	3	P5	mouse
P00493	Hprt	hypoxanthine guanine phosphoribosyl transferase	15452	P00493	FB-P5	-0.144382	0.616474	0.752538	no	-0.144382	0.752538	3	3	3	P5	mouse
P00493	Hprt	hypoxanthine guanine phosphoribosyl transferase	15452	P00493	FB-P20	0.31245	0.296766	0.44047	no	0.31245	0.44047	3	3	3	FB	mouse
P00520	Abl1	c-abl oncogene 1, non-receptor tyrosine kinase	11350	P00520	FB-P20	3.50356	0.342403	0.489531	no	3.50356	0.489531	3	1	0	FB	mouse
Q9D1R2	Kti12	KTI12 homolog, chromatin associated	100087	Q9D1R2	FB-P5	#NUM!		0	yes	-5.55953	0.0185905	0	2	2	P5	mouse
Q91YR9	Ptgr1	prostaglandin reductase 1	67103	Q91YR9	FB-P5	-3.42613	5.47324e-06	0.000983814	no	-3.42613	0.000983814	3	3	3	P5	mouse
Q925B0	Pawr	PRKC, apoptosis, WT1, regulator	114774	Q925B0	FB-P20	-3.84223	0.000734884	0.0103075	no	-3.84223	0.0103075	3	3	3	P20	mouse
P01027	C3	complement component 3	12266	P01027	P5-P20	-1.70186	0.123461	0.634892	no	-1.70186	0.634892	3	2	2	P20	mouse
P43277	H1f3	H1.3 linker histone, cluster member	14957	P43277	FB-P20	-3.81142	0.00010535	0.00394117	no	-3.81142	0.00394117	3	3	3	P20	mouse
P51569	P51569			P51569	FB-P5	-3.42584	9.04406e-05	0.00425462	no	-3.42584	0.00425462	2	3	3	P5	mouse
O88874	O88874			O88874	FB-P20	#NUM!		0	yes	-5.57659	0.0227274	0	2	2	P20	mouse
P01878	P01878			P01878	FB-P20	6.87805	0.0148906	0.0600978	no	6.87805	0.0600978	3	1	0	FB	mouse
Q6P8X1	Snx6	sorting nexin 6	72183	Q6P8X1	FB-P20	-3.80278	7.46507e-05	0.00295744	no	-3.80278	0.00295744	3	3	3	P20	mouse
P05784	Krt18	keratin 18	16668	P05784	FB-P5	-3.38489	5.32821e-06	0.000983814	no	-3.38489	0.000983814	3	3	3	P5	mouse
P01942	P01942			P01942	P5-P20	-0.0426786	0.976767	0.997073	no	-0.0426786	0.997073	3	2	2	P20	mouse
P02088	Hbb-b1	hemoglobin, beta adult major chain	15129	P02088	FB-P20	2.91473	0.163192	0.300249	no	2.91473	0.300249	3	3	2	FB	mouse
P02088	Hbb-b1	hemoglobin, beta adult major chain	15129	P02088	FB-P5	4.68013	0.0658329	0.182053	no	4.68013	0.182053	3	3	2	FB	mouse
P02088	Hbb-b1	hemoglobin, beta adult major chain	15129	P02088	P5-P20	-1.7654	0.416587	0.822101	no	-1.7654	0.822101	3	3	2	P20	mouse
Q9D2V5	Aar2	AAR2 splicing factor homolog	68295	Q9D2V5	FB-P20	#NUM!		0	yes	-5.58012	0.0495858	0	2	1	P20	mouse
Q08481	Pecam1	platelet/endothelial cell adhesion molecule 1	18613	Q08481	FB-P20	#NUM!		0	yes	-5.58477	0.0299906	0	2	2	P20	mouse
P02463	Col4a1	collagen, type IV, alpha 1	12826	P02463	P5-P20	-2.17541	0.0638818	0.54263	no	-2.17541	0.54263	0	3	2	P20	mouse
P02468	P02468			P02468	P5-P20	-0.751195	0.382397	0.810691	no	-0.751195	0.810691	2	3	3	P20	mouse
Q923D5	Wbp11	WW domain binding protein 11	60321	Q923D5	FB-P20	-3.79073	0.000373314	0.00789383	no	-3.79073	0.00789383	3	3	3	P20	mouse
P02468	P02468			P02468	FB-P5	-2.71095	0.0271622	0.107159	no	-2.71095	0.107159	2	3	3	P5	mouse
P63260	Actg1	actin, gamma, cytoplasmic 1	11465	P63260	FB-P5	-3.37056	0.000350558	0.00800161	no	-3.37056	0.00800161	2	3	3	P5	mouse
P02469	Lamb1	laminin B1	16777	P02469	P5-P20	-0.887109	0.0200284	0.409399	no	-0.887109	0.409399	2	3	3	P20	mouse
P14094	Atp1b1	ATPase, Na+/K+ transporting, beta 1 polypeptide	11931	P14094	FB-P20	-3.75014	0.000556171	0.00908625	no	-3.75014	0.00908625	2	3	3	P20	mouse
P02535	Krt10	keratin 10	16661	P02535	FB-P5	3.15283	0.105894	0.244424	no	3.15283	0.244424	3	3	3	FB	mouse
P02535	Krt10	keratin 10	16661	P02535	FB-P20	3.00347	0.119979	0.243125	no	3.00347	0.243125	3	3	3	FB	mouse
P02535	Krt10	keratin 10	16661	P02535	P5-P20	-0.149359	0.931142	0.989186	no	-0.149359	0.989186	3	3	3	P20	mouse
Q9QXS1	Plec	plectin	18810	Q9QXS1	FB-P5	-3.35785	1.71022e-05	0.00173218	no	-3.35785	0.00173218	3	3	3	P5	mouse
P02798	Mt2	metallothionein 2	17750	P02798	P5-P20	-1.2817	0.351284	0.788069	no	-1.2817	0.788069	3	3	3	P20	mouse
Q3UKJ7	Smu1	smu-1 suppressor of mec-8 and unc-52 homolog (C. elegans)	74255	Q3UKJ7	FB-P20	-3.7302	0.0013942	0.0143755	no	-3.7302	0.0143755	3	3	3	P20	mouse
P02802	Mt1	metallothionein 1	17748	P02802	P5-P20	1.38475	0.431184	0.831243	no	1.38475	0.831243	0	3	3	P5	mouse
Q8R0A2	Zbtb44	zinc finger and BTB domain containing 44	235132	Q8R0A2	FB-P20	#NUM!		0	yes	-5.60097	0.0192677	0	2	1	P20	mouse
E9Q7D5	Arhgef5	Rho guanine nucleotide exchange factor (GEF) 5	54324	E9Q7D5	FB-P20	#NUM!		0	yes	-5.60798	0.0417789	0	2	2	P20	mouse
Q8VED5	Krt79	keratin 79	223917	Q8VED5	P5-P20	#NUM!		0	yes	-5.61877	0.0199038	2	2	0	P20	mouse
Q9D8V0	H13	histocompatibility 13	14950	Q9D8V0	FB-P5	#NUM!		0	yes	-5.62566	0.01267	0	3	2	P5	mouse
P03930	ATP8	ATP synthase F0 subunit 8	17706	P03930	P5-P20	-1.35503	0.125309	0.636311	no	-1.35503	0.636311	0	3	3	P20	mouse
P03958	Ada	adenosine deaminase	11486	P03958	P5-P20	0.311149	0.567009	0.901842	no	0.311149	0.901842	3	3	3	P5	mouse
P03958	Ada	adenosine deaminase	11486	P03958	FB-P20	1.1976	0.0585878	0.148919	no	1.1976	0.148919	3	3	3	FB	mouse
P03958	Ada	adenosine deaminase	11486	P03958	FB-P5	0.886446	0.135263	0.288141	no	0.886446	0.288141	3	3	3	FB	mouse
Q8R3B1	Plcd1	phospholipase C, delta 1	18799	Q8R3B1	FB-P5	-3.34535	0.00145943	0.0194546	no	-3.34535	0.0194546	3	3	3	P5	mouse
P03975	P03975			P03975	P5-P20	-1.38345	0.0261951	0.427141	no	-1.38345	0.427141	3	3	3	P20	mouse
Q9CZN7	Shmt2	serine hydroxymethyltransferase 2 (mitochondrial)	108037	Q9CZN7	FB-P20	-3.70347	0.00223122	0.0186553	no	-3.70347	0.0186553	2	3	3	P20	mouse
P04104	Krt1	keratin 1	16678	P04104	FB-P5	-0.0198128	0.993473	0.996591	no	-0.0198128	0.996591	3	3	3	P5	mouse
P04104	Krt1	keratin 1	16678	P04104	FB-P20	0.696935	0.774329	0.857818	no	0.696935	0.857818	3	3	3	FB	mouse
P04104	Krt1	keratin 1	16678	P04104	P5-P20	0.716748	0.768142	0.958335	no	0.716748	0.958335	3	3	3	P5	mouse
P25976	P25976			P25976	FB-P5	-3.30577	0.0022453	0.0236732	no	-3.30577	0.0236732	3	3	3	P5	mouse
P04184	Tk1	thymidine kinase 1	21877	P04184	P5-P20	-0.625006	0.119968	0.629996	no	-0.625006	0.629996	2	3	3	P20	mouse
P05202	Got2	glutamatic-oxaloacetic transaminase 2, mitochondrial	14719	P05202	FB-P20	-3.70217	0.00843345	0.0422106	no	-3.70217	0.0422106	1	3	3	P20	mouse
Q61214	Dyrk1a	dual-specificity tyrosine-(Y)-phosphorylation regulated kinase 1a	13548	Q61214	FB-P20	#NUM!		0	yes	-5.65246	0.0496229	0	2	2	P20	mouse
P04627	Araf	Araf proto-oncogene, serine/threonine kinase	11836	P04627	P5-P20	-0.145381	0.891146	0.982545	no	-0.145381	0.982545	0	2	2	P20	mouse
O88322	Nid2	nidogen 2	18074	O88322	FB-P5	#NUM!		0	yes	-5.67893	0.0282572	0	3	2	P5	mouse
P05064	Aldoa	aldolase A, fructose-bisphosphate	11674	P05064	P5-P20	0.641198	0.121092	0.63017	no	0.641198	0.63017	3	3	3	P5	mouse
P05064	Aldoa	aldolase A, fructose-bisphosphate	11674	P05064	FB-P5	-0.772248	0.0726552	0.191587	no	-0.772248	0.191587	3	3	3	P5	mouse
P05064	Aldoa	aldolase A, fructose-bisphosphate	11674	P05064	FB-P20	-0.13105	0.724845	0.817588	no	-0.13105	0.817588	3	3	3	P20	mouse
Q80X80	C2cd2l	C2 calcium-dependent domain containing 2-like	71764	Q80X80	FB-P5	#NUM!		0	yes	-5.67997	0.0495796	0	2	2	P5	mouse
P05132	Prkaca	protein kinase, cAMP dependent, catalytic, alpha	18747	P05132	P5-P20	-1.86572	0.273336	0.742226	no	-1.86572	0.742226	0	2	1	P20	mouse
Q9JHJ0	Tmod3	tropomodulin 3	50875	Q9JHJ0	FB-P5	-3.28809	6.00467e-06	0.00100592	no	-3.28809	0.00100592	3	3	3	P5	mouse
Q9DBG7	Srpr	signal recognition particle receptor ('docking protein')	67398	Q9DBG7	FB-P20	-3.68813	0.000500345	0.00874255	no	-3.68813	0.00874255	3	3	3	P20	mouse
P05201	Got1	glutamic-oxaloacetic transaminase 1, soluble	14718	P05201	P5-P20	0.201329	0.726766	0.952873	no	0.201329	0.952873	3	3	3	P5	mouse
P63260	Actg1	actin, gamma, cytoplasmic 1	11465	P63260	FB-P20	-3.68564	0.000229307	0.00597366	no	-3.68564	0.00597366	2	3	3	P20	mouse
P05202	Got2	glutamatic-oxaloacetic transaminase 2, mitochondrial	14719	P05202	P5-P20	-1.31713	0.071792	0.564601	no	-1.31713	0.564601	1	3	3	P20	mouse
P05202	Got2	glutamatic-oxaloacetic transaminase 2, mitochondrial	14719	P05202	FB-P5	-2.38504	0.0357145	0.125072	no	-2.38504	0.125072	1	3	3	P5	mouse
P05214	Tuba3a	tubulin, alpha 3A	22144	P05214	P5-P20	-1.32705	0.276995	0.748749	no	-1.32705	0.748749	2	2	3	P20	mouse
P05214	Tuba3a	tubulin, alpha 3A	22144	P05214	FB-P20	-2.10704	0.142446	0.272921	no	-2.10704	0.272921	2	2	3	P20	mouse
P05214	Tuba3a	tubulin, alpha 3A	22144	P05214	FB-P5	-0.779993	0.500872	0.663218	no	-0.779993	0.663218	2	2	3	P5	mouse
P05480	Src	Rous sarcoma oncogene	20779	P05480	P5-P20	-0.334391	0.666674	0.930686	no	-0.334391	0.930686	1	3	3	P20	mouse
P05480	Src	Rous sarcoma oncogene	20779	P05480	FB-P5	-2.1599	0.101348	0.237876	no	-2.1599	0.237876	1	3	3	P5	mouse
P05480	Src	Rous sarcoma oncogene	20779	P05480	FB-P20	-2.49429	0.0705856	0.168551	no	-2.49429	0.168551	1	3	3	P20	mouse
P48193	Epb41	erythrocyte membrane protein band 4.1	269587	P48193	FB-P20	-3.68472	0.00594614	0.0341989	no	-3.68472	0.0341989	2	3	3	P20	mouse
O55111	Dsg2	desmoglein 2	13511	O55111	FB-P5	-3.27869	0.000179641	0.00586111	no	-3.27869	0.00586111	3	3	3	P5	mouse
P05784	Krt18	keratin 18	16668	P05784	P5-P20	0.389332	0.133191	0.641035	no	0.389332	0.641035	3	3	3	P5	mouse
Q8BHG9	Cggbp1	CGG triplet repeat binding protein 1	106143	Q8BHG9	FB-P5	-3.27707	0.00411469	0.033429	no	-3.27707	0.033429	1	3	3	P5	mouse
P06151	Ldha	lactate dehydrogenase A	16828	P06151	FB-P20	-1.66672	0.0209013	0.0738854	no	-1.66672	0.0738854	3	3	3	P20	mouse
P06151	Ldha	lactate dehydrogenase A	16828	P06151	P5-P20	1.59738	0.024677	0.425243	no	1.59738	0.425243	3	3	3	P5	mouse
P06745	Gpi1	glucose-6-phosphate isomerase 1	14751	P06745	P5-P20	-0.313198	0.63172	0.925985	no	-0.313198	0.925985	3	3	3	P20	mouse
P06745	Gpi1	glucose-6-phosphate isomerase 1	14751	P06745	FB-P5	-0.300235	0.645626	0.773107	no	-0.300235	0.773107	3	3	3	P5	mouse
P06745	Gpi1	glucose-6-phosphate isomerase 1	14751	P06745	FB-P20	-0.613433	0.361014	0.507751	no	-0.613433	0.507751	3	3	3	P20	mouse
Q9DAZ9	Zfyve19	zinc finger, FYVE domain containing 19	72008	Q9DAZ9	FB-P5	#NUM!		0	yes	-5.68897	0.0440408	0	1	2	P5	mouse
P06797	Ctsl	cathepsin L	13039	P06797	P5-P20	-4.27481	0.00606614	0.271295	no	-4.27481	0.271295	0	2	1	P20	mouse
P06801	Me1	malic enzyme 1, NADP(+)-dependent, cytosolic	17436	P06801	FB-P20	0.668401	0.133339	0.260345	no	0.668401	0.260345	3	3	3	FB	mouse
P06801	Me1	malic enzyme 1, NADP(+)-dependent, cytosolic	17436	P06801	FB-P5	-0.22953	0.572975	0.719317	no	-0.22953	0.719317	3	3	3	P5	mouse
P06801	Me1	malic enzyme 1, NADP(+)-dependent, cytosolic	17436	P06801	P5-P20	0.897931	0.0585235	0.538434	no	0.897931	0.538434	3	3	3	P5	mouse
P97468	Cmklr1	chemokine-like receptor 1	14747	P97468	FB-P5	#NUM!		0	yes	-5.70734	0.0304851	0	2	2	P5	mouse
Q62077	Plcg1	phospholipase C, gamma 1	18803	Q62077	P5-P20	#NUM!		0	yes	-5.71568	0.0378189	1	2	0	P20	mouse
P06802	Enpp1	ectonucleotide pyrophosphatase/phosphodiesterase 1	18605	P06802	P5-P20	0.119744	0.862224	0.978601	no	0.119744	0.978601	0	3	3	P5	mouse
Q3USZ8	Dipk2a	divergent protein kinase domain 2A	68861	Q3USZ8	P5-P20	#NUM!		0	yes	-5.72261	0.0478025	1	2	0	P20	mouse
Q505K2	Fam160a1	family with sequence similarity 160, member A1	229488	Q505K2	FB-P20	#NUM!		0	yes	-5.72672	0.04575	0	2	2	P20	mouse
P07214	Sparc	secreted acidic cysteine rich glycoprotein	20692	P07214	P5-P20	-1.42645	0.125629	0.636311	no	-1.42645	0.636311	0	2	2	P20	mouse
P07356	Anxa2	annexin A2	12306	P07356	P5-P20	-0.240692	0.295656	0.755798	no	-0.240692	0.755798	3	3	3	P20	mouse
Q3UH66	Wnk2	WNK lysine deficient protein kinase 2	75607	Q3UH66	FB-P20	-3.67486	3.86027e-05	0.00192105	no	-3.67486	0.00192105	2	3	3	P20	mouse
P06151	Ldha	lactate dehydrogenase A	16828	P06151	FB-P5	-3.2641	0.000894427	0.0145332	no	-3.2641	0.0145332	3	3	3	P5	mouse
P07607	Tyms	thymidylate synthase	22171	P07607	P5-P20	-0.491312	0.655318	0.929012	no	-0.491312	0.929012	3	3	3	P20	mouse
P07607	Tyms	thymidylate synthase	22171	P07607	FB-P5	0.642717	0.561679	0.710999	no	0.642717	0.710999	3	3	3	FB	mouse
P07607	Tyms	thymidylate synthase	22171	P07607	FB-P20	0.151404	0.889709	0.937408	no	0.151404	0.937408	3	3	3	FB	mouse
Q5QNS5	Havcr1	hepatitis A virus cellular receptor 1	171283	Q5QNS5	FB-P20	-3.67475	0.000718312	0.0102246	no	-3.67475	0.0102246	2	3	3	P20	mouse
P07724	Alb	albumin	11657	P07724	P5-P20	0.323449	0.567433	0.901842	no	0.323449	0.901842	3	3	3	P5	mouse
Q9JIW9	Ralb	v-ral simian leukemia viral oncogene B	64143	Q9JIW9	FB-P5	-3.26117	0.00319646	0.0283735	no	-3.26117	0.0283735	1	3	3	P5	mouse
P07742	Rrm1	ribonucleotide reductase M1	20133	P07742	FB-P5	-1.5733	0.136598	0.290084	no	-1.5733	0.290084	3	3	3	P5	mouse
P07742	Rrm1	ribonucleotide reductase M1	20133	P07742	FB-P20	-1.7965	0.0974589	0.210444	no	-1.7965	0.210444	3	3	3	P20	mouse
P07742	Rrm1	ribonucleotide reductase M1	20133	P07742	P5-P20	-0.2232	0.815559	0.972513	no	-0.2232	0.972513	3	3	3	P20	mouse
Q6PDM1	Msl1	male specific lethal 1	74026	Q6PDM1	FB-P20	#NUM!		0	yes	-5.72988	0.0127603	0	2	1	P20	mouse
P07758	Serpina1a	serine (or cysteine) peptidase inhibitor, clade A, member 1A	20700	P07758	P5-P20	-0.16197	0.737469	0.954825	no	-0.16197	0.954825	0	2	1	P20	mouse
P07901	Hsp90aa1	heat shock protein 90, alpha (cytosolic), class A member 1	15519	P07901	FB-P20	0.03729	0.806827	0.880779	no	0.03729	0.880779	3	3	3	FB	mouse
P07901	Hsp90aa1	heat shock protein 90, alpha (cytosolic), class A member 1	15519	P07901	P5-P20	0.77878	0.00176601	0.224074	no	0.77878	0.224074	3	3	3	P5	mouse
P07901	Hsp90aa1	heat shock protein 90, alpha (cytosolic), class A member 1	15519	P07901	FB-P5	-0.74149	0.00226192	0.0237419	no	-0.74149	0.0237419	3	3	3	P5	mouse
P30275	Ckmt1	creatine kinase, mitochondrial 1, ubiquitous	12716	P30275	FB-P5	-3.23655	4.74022e-06	0.000983814	no	-3.23655	0.000983814	3	3	3	P5	mouse
P08003	Pdia4	protein disulfide isomerase associated 4	12304	P08003	P5-P20	-0.106506	0.731318	0.953983	no	-0.106506	0.953983	3	3	3	P20	mouse
Q9EP69	Sacm1l	SAC1 suppressor of actin mutations 1-like (yeast)	83493	Q9EP69	FB-P20	-3.67078	6.47647e-05	0.00269976	no	-3.67078	0.00269976	2	3	3	P20	mouse
P08030	Aprt	adenine phosphoribosyl transferase	11821	P08030	FB-P5	-1.00004	0.520146	0.679047	no	-1.00004	0.679047	3	3	3	P5	mouse
P08030	Aprt	adenine phosphoribosyl transferase	11821	P08030	P5-P20	0.467025	0.760596	0.958335	no	0.467025	0.958335	3	3	3	P5	mouse
P08030	Aprt	adenine phosphoribosyl transferase	11821	P08030	FB-P20	-0.533018	0.72835	0.820272	no	-0.533018	0.820272	3	3	3	P20	mouse
P08043	Zfp2	zinc finger protein 2	22678	P08043	FB-P5	-0.605628	0.839557	0.906368	no	-0.605628	0.906368	1	2	2	P5	mouse
P08043	Zfp2	zinc finger protein 2	22678	P08043	FB-P20	1.42781	0.642157	0.755265	no	1.42781	0.755265	1	2	2	FB	mouse
P08043	Zfp2	zinc finger protein 2	22678	P08043	P5-P20	2.03343	0.444287	0.837154	no	2.03343	0.837154	1	2	2	P5	mouse
Q9DBG9	Tax1bp3	Tax1 (human T cell leukemia virus type I) binding protein 3	76281	Q9DBG9	FB-P20	#NUM!		0	yes	-5.73056	0.0481566	0	2	1	P20	mouse
Q9JM05	Pias4	protein inhibitor of activated STAT 4	59004	Q9JM05	FB-P20	#NUM!		0	yes	-5.74017	0.041306	0	2	3	P20	mouse
P08074	Cbr2	carbonyl reductase 2	12409	P08074	FB-P5	-1.49975	0.661524	0.784231	no	-1.49975	0.784231	1	2	2	P5	mouse
P08074	Cbr2	carbonyl reductase 2	12409	P08074	P5-P20	0.674833	0.805552	0.970635	no	0.674833	0.970635	1	2	2	P5	mouse
P08074	Cbr2	carbonyl reductase 2	12409	P08074	FB-P20	-0.824914	0.805911	0.880437	no	-0.824914	0.880437	1	2	2	P20	mouse
P08113	Hsp90b1	heat shock protein 90, beta (Grp94), member 1	22027	P08113	P5-P20	-0.040363	0.85164	0.977657	no	-0.040363	0.977657	3	3	3	P20	mouse
P08113	Hsp90b1	heat shock protein 90, beta (Grp94), member 1	22027	P08113	FB-P20	0.165198	0.454678	0.595861	no	0.165198	0.595861	3	3	3	FB	mouse
P08113	Hsp90b1	heat shock protein 90, beta (Grp94), member 1	22027	P08113	FB-P5	0.205561	0.358433	0.537743	no	0.205561	0.537743	3	3	3	FB	mouse
Q62158	Trim27	tripartite motif-containing 27	19720	Q62158	FB-P20	#NUM!		0	yes	-5.76714	0.0263254	0	2	2	P20	mouse
Q9D0M1	Prpsap1	phosphoribosyl pyrophosphate synthetase-associated protein 1	67763	Q9D0M1	FB-P5	#NUM!		0	yes	-5.77332	0.0477574	0	2	2	P5	mouse
P08122	Col4a2	collagen, type IV, alpha 2	12827	P08122	P5-P20	-2.07377	0.0361365	0.486009	no	-2.07377	0.486009	0	3	2	P20	mouse
P08207	S100a10	S100 calcium binding protein A10 (calpactin)	20194	P08207	FB-P5	-3.89571	0.0450431	0.145392	no	-3.89571	0.145392	3	3	3	P5	mouse
P08207	S100a10	S100 calcium binding protein A10 (calpactin)	20194	P08207	P5-P20	1.43145	0.389488	0.816582	no	1.43145	0.816582	3	3	3	P5	mouse
P08207	S100a10	S100 calcium binding protein A10 (calpactin)	20194	P08207	FB-P20	-2.46426	0.161474	0.298079	no	-2.46426	0.298079	3	3	3	P20	mouse
P08226	Apoe	apolipoprotein E	11816	P08226	P5-P20	-0.772221	0.165407	0.676625	no	-0.772221	0.676625	2	3	3	P20	mouse
P08226	Apoe	apolipoprotein E	11816	P08226	FB-P5	-2.0268	0.0124839	0.0654673	no	-2.0268	0.0654673	2	3	3	P5	mouse
P54103	Dnajc2	DnaJ heat shock protein family (Hsp40) member C2	22791	P54103	FB-P20	-3.63675	0.00015641	0.00470521	no	-3.63675	0.00470521	3	3	3	P20	mouse
P08228	Sod1	superoxide dismutase 1, soluble	20655	P08228	P5-P20	0.686361	0.309994	0.765524	no	0.686361	0.765524	3	3	3	P5	mouse
P08228	Sod1	superoxide dismutase 1, soluble	20655	P08228	FB-P20	1.68036	0.0348994	0.105675	no	1.68036	0.105675	3	3	3	FB	mouse
P08228	Sod1	superoxide dismutase 1, soluble	20655	P08228	FB-P5	0.994001	0.159463	0.321158	no	0.994001	0.321158	3	3	3	FB	mouse
P08249	Mdh2	malate dehydrogenase 2, NAD (mitochondrial)	17448	P08249	FB-P20	-0.160589	0.581787	0.707356	no	-0.160589	0.707356	3	3	3	P20	mouse
P08249	Mdh2	malate dehydrogenase 2, NAD (mitochondrial)	17448	P08249	P5-P20	0.0617705	0.830302	0.97646	no	0.0617705	0.97646	3	3	3	P5	mouse
P08249	Mdh2	malate dehydrogenase 2, NAD (mitochondrial)	17448	P08249	FB-P5	-0.22236	0.451101	0.623734	no	-0.22236	0.623734	3	3	3	P5	mouse
A2BH40	Arid1a	AT rich interactive domain 1A (SWI-like)	93760	A2BH40	FB-P5	-3.21697	0.00164211	0.0205017	no	-3.21697	0.0205017	2	3	3	P5	mouse
P08752	Gnai2	guanine nucleotide binding protein (G protein), alpha inhibiting 2	14678	P08752	P5-P20	-0.412654	0.234788	0.722675	no	-0.412654	0.722675	3	3	3	P20	mouse
Q3UH06	Rreb1	ras responsive element binding protein 1	68750	Q3UH06	FB-P20	-3.59691	0.0105937	0.0489894	no	-3.59691	0.0489894	1	3	3	P20	mouse
P08775	Polr2a	polymerase (RNA) II (DNA directed) polypeptide A	20020	P08775	FB-P20	-1.64682	0.0145617	0.0597622	no	-1.64682	0.0597622	3	3	3	P20	mouse
P08775	Polr2a	polymerase (RNA) II (DNA directed) polypeptide A	20020	P08775	P5-P20	-0.589567	0.269687	0.740446	no	-0.589567	0.740446	3	3	3	P20	mouse
P08775	Polr2a	polymerase (RNA) II (DNA directed) polypeptide A	20020	P08775	FB-P5	-1.05725	0.0720185	0.191548	no	-1.05725	0.191548	3	3	3	P5	mouse
Q922G2	Fam76a	family with sequence similarity 76, member A	230789	Q922G2	FB-P5	#NUM!		0	yes	-5.77597	0.0144884	0	2	2	P5	mouse
O88824	Jtb	jumping translocation breakpoint	23922	O88824	FB-P5	#NUM!		0	yes	-5.78062	0.0412895	0	3	2	P5	mouse
Q810Q5	AA467197	expressed sequence AA467197	433470	Q810Q5	FB-P5	-3.21409	0.000241904	0.00650201	no	-3.21409	0.00650201	3	3	3	P5	mouse
P09055	Itgb1	integrin beta 1 (fibronectin receptor beta)	16412	P09055	P5-P20	-1.12826	0.000142755	0.207564	no	-1.12826	0.207564	3	3	3	P20	mouse
Q61879	Myh10	myosin, heavy polypeptide 10, non-muscle	77579	Q61879	FB-P20	-3.58821	1.45614e-06	0.000531125	no	-3.58821	0.000531125	3	3	3	P20	mouse
P09103	P4hb	prolyl 4-hydroxylase, beta polypeptide	18453	P09103	FB-P5	-0.649279	0.00136083	0.0186048	no	-0.649279	0.0186048	3	3	3	P5	mouse
P09103	P4hb	prolyl 4-hydroxylase, beta polypeptide	18453	P09103	P5-P20	0.0955907	0.439982	0.835403	no	0.0955907	0.835403	3	3	3	P5	mouse
P09103	P4hb	prolyl 4-hydroxylase, beta polypeptide	18453	P09103	FB-P20	-0.553688	0.00303443	0.0225294	no	-0.553688	0.0225294	3	3	3	P20	mouse
Q6NS46	Pdcd11	programmed cell death 11	18572	Q6NS46	FB-P20	-3.58463	0.00749465	0.0391925	no	-3.58463	0.0391925	3	3	3	P20	mouse
P09242	Alpl	alkaline phosphatase, liver/bone/kidney	11647	P09242	P5-P20	-0.980548	0.00335194	0.231382	no	-0.980548	0.231382	3	3	3	P20	mouse
P09242	Alpl	alkaline phosphatase, liver/bone/kidney	11647	P09242	FB-P5	-0.247047	0.281821	0.462702	no	-0.247047	0.462702	3	3	3	P5	mouse
P09405	Ncl	nucleolin	17975	P09405	FB-P20	-0.679277	0.0209218	0.0738854	no	-0.679277	0.0738854	3	3	3	P20	mouse
P26039	Tln1	talin 1	21894	P26039	FB-P5	-3.20215	3.47651e-05	0.00232522	no	-3.20215	0.00232522	3	3	3	P5	mouse
P09405	Ncl	nucleolin	17975	P09405	P5-P20	0.33807	0.172955	0.687375	no	0.33807	0.687375	3	3	3	P5	mouse
P09411	Pgk1	phosphoglycerate kinase 1	18655	P09411	FB-P20	0.071642	0.874736	0.9275	no	0.071642	0.9275	3	3	3	FB	mouse
P09411	Pgk1	phosphoglycerate kinase 1	18655	P09411	P5-P20	0.699715	0.159246	0.669478	no	0.699715	0.669478	3	3	3	P5	mouse
P09411	Pgk1	phosphoglycerate kinase 1	18655	P09411	FB-P5	-0.628073	0.199343	0.375942	no	-0.628073	0.375942	3	3	3	P5	mouse
Q569Z6	Thrap3	thyroid hormone receptor associated protein 3	230753	Q569Z6	FB-P5	-3.19396	2.78223e-05	0.00220693	no	-3.19396	0.00220693	3	3	3	P5	mouse
P09602	Hmgn2	high mobility group nucleosomal binding domain 2	15331	P09602	FB-P20	-3.91711	0.0160068	0.06266	no	-3.91711	0.06266	3	2	2	P20	mouse
P09602	Hmgn2	high mobility group nucleosomal binding domain 2	15331	P09602	P5-P20	1.01487	0.396704	0.81747	no	1.01487	0.81747	3	2	2	P5	mouse
P09671	Sod2	superoxide dismutase 2, mitochondrial	20656	P09671	P5-P20	0.565513	0.333608	0.778902	no	0.565513	0.778902	3	3	3	P5	mouse
P09671	Sod2	superoxide dismutase 2, mitochondrial	20656	P09671	FB-P5	0.200973	0.721538	0.828732	no	0.200973	0.828732	3	3	3	FB	mouse
P09671	Sod2	superoxide dismutase 2, mitochondrial	20656	P09671	FB-P20	0.766485	0.204059	0.352372	no	0.766485	0.352372	3	3	3	FB	mouse
P09803	Cdh1	cadherin 1	12550	P09803	P5-P20	0.00921773	0.976798	0.997073	no	0.00921773	0.997073	3	3	3	P5	mouse
Q9WUM5	Suclg1	succinate-CoA ligase, GDP-forming, alpha subunit	56451	Q9WUM5	FB-P5	-3.16764	0.0080298	0.0494512	no	-3.16764	0.0494512	3	3	3	P5	mouse
Q9JHJ0	Tmod3	tropomodulin 3	50875	Q9JHJ0	FB-P20	-3.57713	3.66168e-06	0.000667799	no	-3.57713	0.000667799	3	3	3	P20	mouse
Q8CCG4	Dppa4	developmental pluripotency associated 4	73693	Q8CCG4	FB-P5	#NUM!		0	yes	-5.79499	0.0293444	0	2	2	P5	mouse
P09925	Surf1	surfeit gene 1	20930	P09925	FB-P20	-0.0708828	0.961737	0.978504	no	-0.0708828	0.978504	3	1	0	P20	mouse
P09926	Surf2	surfeit gene 2	20931	P09926	P5-P20	-1.5402	0.0741887	0.566667	no	-1.5402	0.566667	3	3	3	P20	mouse
P09926	Surf2	surfeit gene 2	20931	P09926	FB-P20	-2.13873	0.0240743	0.0811189	no	-2.13873	0.0811189	3	3	3	P20	mouse
P09926	Surf2	surfeit gene 2	20931	P09926	FB-P5	-0.59853	0.433638	0.608359	no	-0.59853	0.608359	3	3	3	P5	mouse
P0C0S6	H2az1	H2A.Z variant histone 1	51788	P0C0S6	P5-P20	0.632361	0.214673	0.718522	no	0.632361	0.718522	3	3	3	P5	mouse
P0C0S6	H2az1	H2A.Z variant histone 1	51788	P0C0S6	FB-P5	-1.01569	0.0674205	0.183939	no	-1.01569	0.183939	3	3	3	P5	mouse
P0C0S6	H2az1	H2A.Z variant histone 1	51788	P0C0S6	FB-P20	-0.383331	0.432585	0.577439	no	-0.383331	0.577439	3	3	3	P20	mouse
P0C8B4	Gon7	GON7 subunit of KEOPS complex	100233175	P0C8B4	P5-P20	-0.267747	0.528053	0.878195	no	-0.267747	0.878195	0	2	1	P20	mouse
Q80X80	C2cd2l	C2 calcium-dependent domain containing 2-like	71764	Q80X80	FB-P20	#NUM!		0	yes	-5.80207	0.0257384	0	2	2	P20	mouse
Q9CZP7	Cdc37l1	cell division cycle 37-like 1	67072	Q9CZP7	FB-P20	#NUM!		0	yes	-5.80286	0.0348619	0	2	3	P20	mouse
P70268	Pkn1	protein kinase N1	320795	P70268	FB-P20	#NUM!		0	yes	-5.81469	0.0156192	0	2	2	P20	mouse
Q8BU00	Ikzf5	IKAROS family zinc finger 5	67143	Q8BU00	FB-P20	#NUM!		0	yes	-5.81711	0.0348894	0	2	2	P20	mouse
P0DN89	Tmem254a	transmembrane protein 254a	66039	P0DN89	FB-P20	-0.0507432	0.975001	0.984659	no	-0.0507432	0.984659	2	1	0	P20	mouse
P0DP26	Calm1	calmodulin 1	12313	P0DP26	FB-P20	0.341065	0.578311	0.704666	no	0.341065	0.704666	3	3	3	FB	mouse
P0DP26	Calm1	calmodulin 1	12313	P0DP26	P5-P20	-0.127913	0.832924	0.97646	no	-0.127913	0.97646	3	3	3	P20	mouse
P0DP26	Calm1	calmodulin 1	12313	P0DP26	FB-P5	0.468979	0.45004	0.623165	no	0.468979	0.623165	3	3	3	FB	mouse
P10107	Anxa1	annexin A1	16952	P10107	P5-P20	0.491868	0.825857	0.975542	no	0.491868	0.975542	3	3	3	P5	mouse
P10107	Anxa1	annexin A1	16952	P10107	FB-P5	-1.3281	0.5577	0.707519	no	-1.3281	0.707519	3	3	3	P5	mouse
P10107	Anxa1	annexin A1	16952	P10107	FB-P20	-0.836231	0.709485	0.804929	no	-0.836231	0.804929	3	3	3	P20	mouse
P10126	Eef1a1	eukaryotic translation elongation factor 1 alpha 1	13627	P10126	FB-P20	0.854457	0.0897122	0.198802	no	0.854457	0.198802	3	3	3	FB	mouse
P10126	Eef1a1	eukaryotic translation elongation factor 1 alpha 1	13627	P10126	P5-P20	0.380001	0.403276	0.819802	no	0.380001	0.819802	3	3	3	P5	mouse
P10126	Eef1a1	eukaryotic translation elongation factor 1 alpha 1	13627	P10126	FB-P5	0.474456	0.304554	0.486247	no	0.474456	0.486247	3	3	3	FB	mouse
P10493	Nid1	nidogen 1	18073	P10493	P5-P20	-1.89443	0.0189199	0.401233	no	-1.89443	0.401233	1	3	3	P20	mouse
P10493	Nid1	nidogen 1	18073	P10493	FB-P5	-2.2921	0.0310613	0.115751	no	-2.2921	0.115751	1	3	3	P5	mouse
P58404	Strn4	striatin, calmodulin binding protein 4	97387	P58404	FB-P20	-3.54758	0.0066369	0.0366742	no	-3.54758	0.0366742	1	3	3	P20	mouse
Q9D8Y0	Q9D8Y0			Q9D8Y0	FB-P20	-3.52831	0.000239958	0.0059846	no	-3.52831	0.0059846	3	3	3	P20	mouse
P10518	Alad	aminolevulinate, delta-, dehydratase	17025	P10518	P5-P20	0.070136	0.887093	0.982377	no	0.070136	0.982377	3	3	3	P5	mouse
Q925B0	Pawr	PRKC, apoptosis, WT1, regulator	114774	Q925B0	FB-P5	-3.16609	0.00200416	0.022341	no	-3.16609	0.022341	3	3	3	P5	mouse
P10605	Ctsb	cathepsin B	13030	P10605	FB-P20	4.12026	0.0162383	0.0631778	no	4.12026	0.0631778	3	3	3	FB	mouse
P10605	Ctsb	cathepsin B	13030	P10605	FB-P5	3.92755	0.0197244	0.0880858	no	3.92755	0.0880858	3	3	3	FB	mouse
P10605	Ctsb	cathepsin B	13030	P10605	P5-P20	0.19271	0.882104	0.982377	no	0.19271	0.982377	3	3	3	P5	mouse
P10630	Eif4a2	eukaryotic translation initiation factor 4A2	13682	P10630	P5-P20	-0.639491	0.658705	0.929012	no	-0.639491	0.929012	1	1	2	P20	mouse
P10630	Eif4a2	eukaryotic translation initiation factor 4A2	13682	P10630	FB-P5	1.10827	0.490689	0.653826	no	1.10827	0.653826	1	1	2	FB	mouse
P10639	Txn1	thioredoxin 1	22166	P10639	FB-P5	-1.80294	0.0475246	0.149005	no	-1.80294	0.149005	3	3	3	P5	mouse
P10639	Txn1	thioredoxin 1	22166	P10639	FB-P20	-1.55593	0.0757328	0.177216	no	-1.55593	0.177216	3	3	3	P20	mouse
P10639	Txn1	thioredoxin 1	22166	P10639	P5-P20	0.24701	0.745182	0.956906	no	0.24701	0.956906	3	3	3	P5	mouse
P10711	Tcea1	transcription elongation factor A (SII) 1	21399	P10711	P5-P20	1.38031	0.184708	0.688053	no	1.38031	0.688053	3	3	3	P5	mouse
P10711	Tcea1	transcription elongation factor A (SII) 1	21399	P10711	FB-P5	-1.1575	0.255657	0.437305	no	-1.1575	0.437305	3	3	3	P5	mouse
P10711	Tcea1	transcription elongation factor A (SII) 1	21399	P10711	FB-P20	0.222811	0.816946	0.88915	no	0.222811	0.88915	3	3	3	FB	mouse
P10761	Zp3	zona pellucida glycoprotein 3	22788	P10761	P5-P20	0.155421	0.656255	0.929012	no	0.155421	0.929012	3	3	3	P5	mouse
P10761	Zp3	zona pellucida glycoprotein 3	22788	P10761	FB-P5	-0.175373	0.616348	0.752538	no	-0.175373	0.752538	3	3	3	P5	mouse
P10761	Zp3	zona pellucida glycoprotein 3	22788	P10761	FB-P20	-0.0199511	0.954039	0.975071	no	-0.0199511	0.975071	3	3	3	P20	mouse
P10852	Slc3a2	solute carrier family 3 (activators of dibasic and neutral amino acid transport), member 2	17254	P10852	P5-P20	-0.555043	0.205561	0.707521	no	-0.555043	0.707521	3	3	3	P20	mouse
P26039	Tln1	talin 1	21894	P26039	FB-P20	-3.52753	1.98888e-05	0.00135279	no	-3.52753	0.00135279	3	3	3	P20	mouse
P10852	Slc3a2	solute carrier family 3 (activators of dibasic and neutral amino acid transport), member 2	17254	P10852	FB-P5	-1.19828	0.0220964	0.0944268	no	-1.19828	0.0944268	3	3	3	P5	mouse
P10922	H1f0	H1.0 linker histone	14958	P10922	FB-P5	-1.5427	0.0655925	0.181563	no	-1.5427	0.181563	2	3	3	P5	mouse
Q8K5C0	Grhl2	grainyhead like transcription factor 2	252973	Q8K5C0	FB-P20	-3.4995	0.00889066	0.0434555	no	-3.4995	0.0434555	2	3	2	P20	mouse
P10922	H1f0	H1.0 linker histone	14958	P10922	P5-P20	-1.23896	0.0886518	0.587635	no	-1.23896	0.587635	2	3	3	P20	mouse
P10923	Spp1	secreted phosphoprotein 1	20750	P10923	P5-P20	-1.10629	0.28721	0.755798	no	-1.10629	0.755798	1	1	3	P20	mouse
P10923	Spp1	secreted phosphoprotein 1	20750	P10923	FB-P5	1.15893	0.271119	0.453529	no	1.15893	0.453529	1	1	3	FB	mouse
P11031	Sub1	SUB1 homolog, transcriptional regulator	20024	P11031	FB-P5	-0.408993	0.39799	0.577215	no	-0.408993	0.577215	3	3	3	P5	mouse
P09055	Itgb1	integrin beta 1 (fibronectin receptor beta)	16412	P09055	FB-P20	-3.48699	1.97266e-07	0.000191874	no	-3.48699	0.000191874	3	3	3	P20	mouse
P11031	Sub1	SUB1 homolog, transcriptional regulator	20024	P11031	P5-P20	-2.16542	0.00294888	0.231382	no	-2.16542	0.231382	3	3	3	P20	mouse
P11103	P11103			P11103	FB-P5	-0.0607969	0.914929	0.954074	no	-0.0607969	0.954074	3	3	3	P5	mouse
P11103	P11103			P11103	P5-P20	-0.332517	0.564666	0.901842	no	-0.332517	0.901842	3	3	3	P20	mouse
P11103	P11103			P11103	FB-P20	-0.393314	0.498194	0.634263	no	-0.393314	0.634263	3	3	3	P20	mouse
P11152	Lpl	lipoprotein lipase	16956	P11152	P5-P20	-0.343464	0.639991	0.927625	no	-0.343464	0.927625	0	3	1	P20	mouse
Q8R1K1	Ubac2	ubiquitin associated domain containing 2	68889	Q8R1K1	FB-P5	#NUM!		0	yes	-5.81852	0.0234908	0	1	2	P5	mouse
P11157	Rrm2	ribonucleotide reductase M2	20135	P11157	FB-P5	0.479385	0.078888	0.202754	no	0.479385	0.202754	3	3	3	FB	mouse
P11157	Rrm2	ribonucleotide reductase M2	20135	P11157	P5-P20	0.251016	0.310626	0.765633	no	0.251016	0.765633	3	3	3	P5	mouse
P11157	Rrm2	ribonucleotide reductase M2	20135	P11157	FB-P20	0.730401	0.0181009	0.0678028	no	0.730401	0.0678028	3	3	3	FB	mouse
P11214	Plat	plasminogen activator, tissue	18791	P11214	P5-P20	-2.52563	0.00385128	0.238159	no	-2.52563	0.238159	3	3	3	P20	mouse
Q3UKJ7	Smu1	smu-1 suppressor of mec-8 and unc-52 homolog (C. elegans)	74255	Q3UKJ7	FB-P5	-3.16428	0.00318634	0.0283712	no	-3.16428	0.0283712	3	3	3	P5	mouse
Q9JIW9	Ralb	v-ral simian leukemia viral oncogene B	64143	Q9JIW9	FB-P20	-3.46979	0.00253917	0.0203552	no	-3.46979	0.0203552	1	3	3	P20	mouse
A2AHC3	Camsap1	calmodulin regulated spectrin-associated protein 1	227634	A2AHC3	FB-P20	#NUM!		0	yes	-5.85437	0.048059	0	2	2	P20	mouse
P11260	P11260			P11260	P5-P20	0.750863	0.111809	0.623204	no	0.750863	0.623204	0	3	2	P5	mouse
Q9ERH4	Nusap1	nucleolar and spindle associated protein 1	108907	Q9ERH4	FB-P5	#NUM!		0	yes	-5.86896	0.0361966	0	3	2	P5	mouse
P11276	Fn1	fibronectin 1	14268	P11276	FB-P5	-1.34998	0.061354	0.175054	no	-1.34998	0.175054	3	2	3	P5	mouse
P11276	Fn1	fibronectin 1	14268	P11276	FB-P20	-1.26161	0.10077	0.214683	no	-1.26161	0.214683	3	2	3	P20	mouse
P11276	Fn1	fibronectin 1	14268	P11276	P5-P20	0.0883723	0.893579	0.982759	no	0.0883723	0.982759	3	2	3	P5	mouse
P11352	Gpx1	glutathione peroxidase 1	14775	P11352	P5-P20	-0.2216	0.772187	0.958335	no	-0.2216	0.958335	3	3	3	P20	mouse
P11352	Gpx1	glutathione peroxidase 1	14775	P11352	FB-P20	1.95029	0.0372305	0.110405	no	1.95029	0.110405	3	3	3	FB	mouse
P11352	Gpx1	glutathione peroxidase 1	14775	P11352	FB-P5	2.17189	0.0249966	0.10247	no	2.17189	0.10247	3	3	3	FB	mouse
Q8R3B1	Plcd1	phospholipase C, delta 1	18799	Q8R3B1	FB-P20	-3.46307	0.0012208	0.0133921	no	-3.46307	0.0133921	3	3	3	P20	mouse
Q6IRU2	Tpm4	tropomyosin 4	326618	Q6IRU2	FB-P5	-3.15739	0.000838735	0.0141064	no	-3.15739	0.0141064	3	3	3	P5	mouse
P11404	Fabp3	fatty acid binding protein 3, muscle and heart	14077	P11404	P5-P20	0.760628	0.27521	0.745136	no	0.760628	0.745136	3	3	3	P5	mouse
P11438	Lamp1	lysosomal-associated membrane protein 1	16783	P11438	FB-P5	-0.487012	0.48619	0.650729	no	-0.487012	0.650729	3	3	3	P5	mouse
P11438	Lamp1	lysosomal-associated membrane protein 1	16783	P11438	P5-P20	-0.542144	0.440492	0.835659	no	-0.542144	0.835659	3	3	3	P20	mouse
P11438	Lamp1	lysosomal-associated membrane protein 1	16783	P11438	FB-P20	-1.02916	0.167999	0.306558	no	-1.02916	0.306558	3	3	3	P20	mouse
P11679	Krt8	keratin 8	16691	P11679	FB-P5	-3.15057	1.69444e-06	0.000790759	no	-3.15057	0.000790759	3	3	3	P5	mouse
P02468	P02468			P02468	FB-P20	-3.46215	0.010893	0.0496482	no	-3.46215	0.0496482	2	3	3	P20	mouse
P11440	Cdk1	cyclin-dependent kinase 1	12534	P11440	P5-P20	0.0179447	0.950892	0.990855	no	0.0179447	0.990855	3	3	3	P5	mouse
P11499	Hsp90ab1	heat shock protein 90 alpha (cytosolic), class B member 1	15516	P11499	P5-P20	0.429045	0.0413672	0.498555	no	0.429045	0.498555	3	3	3	P5	mouse
P11499	Hsp90ab1	heat shock protein 90 alpha (cytosolic), class B member 1	15516	P11499	FB-P20	0.201105	0.270825	0.418795	no	0.201105	0.418795	3	3	3	FB	mouse
P11499	Hsp90ab1	heat shock protein 90 alpha (cytosolic), class B member 1	15516	P11499	FB-P5	-0.22794	0.218411	0.397815	no	-0.22794	0.397815	3	3	3	P5	mouse
Q61263	Soat1	sterol O-acyltransferase 1	20652	Q61263	P5-P20	#NUM!		0	yes	-5.87207	0.0469981	1	2	0	P20	mouse
Q08481	Pecam1	platelet/endothelial cell adhesion molecule 1	18613	Q08481	FB-P5	#NUM!		0	yes	-5.87825	0.0351659	0	2	2	P5	mouse
Q61879	Myh10	myosin, heavy polypeptide 10, non-muscle	77579	Q61879	FB-P5	-3.11734	3.33889e-06	0.000944144	no	-3.11734	0.000944144	3	3	3	P5	mouse
P11679	Krt8	keratin 8	16691	P11679	P5-P20	0.650626	0.00910545	0.324994	no	0.650626	0.324994	3	3	3	P5	mouse
Q91YW3	Dnajc3	DnaJ heat shock protein family (Hsp40) member C3	100037258	Q91YW3	FB-P20	-3.45364	0.0024218	0.0198253	no	-3.45364	0.0198253	3	3	3	P20	mouse
P11688	Itga5	integrin alpha 5 (fibronectin receptor alpha)	16402	P11688	P5-P20	-1.58662	0.120052	0.629996	no	-1.58662	0.629996	2	3	2	P20	mouse
P11688	Itga5	integrin alpha 5 (fibronectin receptor alpha)	16402	P11688	FB-P5	0.261971	0.781208	0.870173	no	0.261971	0.870173	2	3	2	FB	mouse
P11688	Itga5	integrin alpha 5 (fibronectin receptor alpha)	16402	P11688	FB-P20	-1.32465	0.175224	0.316009	no	-1.32465	0.316009	2	3	2	P20	mouse
P11983	Tcp1	t-complex protein 1	21454	P11983	FB-P20	-0.293895	0.0739403	0.174015	no	-0.293895	0.174015	3	3	3	P20	mouse
P11983	Tcp1	t-complex protein 1	21454	P11983	P5-P20	0.0242161	0.864514	0.978601	no	0.0242161	0.978601	3	3	3	P5	mouse
P11983	Tcp1	t-complex protein 1	21454	P11983	FB-P5	-0.318112	0.0578894	0.169197	no	-0.318112	0.169197	3	3	3	P5	mouse
P12367	P12367			P12367	FB-P5	-1.19788	0.126681	0.274969	no	-1.19788	0.274969	3	3	3	P5	mouse
P12367	P12367			P12367	FB-P20	-1.83167	0.0350894	0.105929	no	-1.83167	0.105929	3	3	3	P20	mouse
P12367	P12367			P12367	P5-P20	-0.633792	0.384528	0.811926	no	-0.633792	0.811926	3	3	3	P20	mouse
P12382	Pfkl	phosphofructokinase, liver, B-type	18641	P12382	FB-P20	0.843806	0.386244	0.531075	no	0.843806	0.531075	3	2	3	FB	mouse
P12382	Pfkl	phosphofructokinase, liver, B-type	18641	P12382	FB-P5	-1.18814	0.195446	0.370595	no	-1.18814	0.370595	3	2	3	P5	mouse
P12382	Pfkl	phosphofructokinase, liver, B-type	18641	P12382	P5-P20	2.03194	0.0710899	0.561833	no	2.03194	0.561833	3	2	3	P5	mouse
Q9JHC9	Elf2	E74-like factor 2	69257	Q9JHC9	P5-P20	#NUM!		0	yes	-5.88789	0.0183896	1	2	0	P20	mouse
P12787	Cox5a	cytochrome c oxidase subunit 5A	12858	P12787	FB-P5	-0.707256	0.168086	0.331561	no	-0.707256	0.331561	3	3	3	P5	mouse
P12787	Cox5a	cytochrome c oxidase subunit 5A	12858	P12787	FB-P20	-1.03513	0.0616132	0.154722	no	-1.03513	0.154722	3	3	3	P20	mouse
P12787	Cox5a	cytochrome c oxidase subunit 5A	12858	P12787	P5-P20	-0.327878	0.494834	0.864388	no	-0.327878	0.864388	3	3	3	P20	mouse
P12815	Pdcd6	programmed cell death 6	18570	P12815	FB-P20	1.14927	0.36874	0.515071	no	1.14927	0.515071	2	2	2	FB	mouse
P12815	Pdcd6	programmed cell death 6	18570	P12815	FB-P5	1.28096	0.324321	0.503201	no	1.28096	0.503201	2	2	2	FB	mouse
P12815	Pdcd6	programmed cell death 6	18570	P12815	P5-P20	-0.131696	0.911388	0.986031	no	-0.131696	0.986031	2	2	2	P20	mouse
P12970	Rpl7a	ribosomal protein L7A	27176	P12970	FB-P20	-0.352297	0.0827906	0.18771	no	-0.352297	0.18771	3	3	3	P20	mouse
P12970	Rpl7a	ribosomal protein L7A	27176	P12970	P5-P20	0.0267854	0.87956	0.982129	no	0.0267854	0.982129	3	3	3	P5	mouse
P12970	Rpl7a	ribosomal protein L7A	27176	P12970	FB-P5	-0.379082	0.0665646	0.183318	no	-0.379082	0.183318	3	3	3	P5	mouse
P13011	Scd2	stearoyl-Coenzyme A desaturase 2	20250	P13011	FB-P20	1.21154	0.175366	0.31607	no	1.21154	0.31607	1	2	1	FB	mouse
P13011	Scd2	stearoyl-Coenzyme A desaturase 2	20250	P13011	P5-P20	0.839992	0.246437	0.728324	no	0.839992	0.728324	1	2	1	P5	mouse
P13020	Gsn	gelsolin	227753	P13020	FB-P20	-1.86283	0.0162612	0.0631827	no	-1.86283	0.0631827	3	3	3	P20	mouse
P13020	Gsn	gelsolin	227753	P13020	FB-P5	-1.67591	0.0247851	0.101832	no	-1.67591	0.101832	3	3	3	P5	mouse
P13020	Gsn	gelsolin	227753	P13020	P5-P20	-0.18692	0.751287	0.957355	no	-0.18692	0.957355	3	3	3	P20	mouse
P13439	Umps	uridine monophosphate synthetase	22247	P13439	P5-P20	-0.175074	0.751054	0.957355	no	-0.175074	0.957355	3	3	3	P20	mouse
P13439	Umps	uridine monophosphate synthetase	22247	P13439	FB-P20	-1.49291	0.0298569	0.0954244	no	-1.49291	0.0954244	3	3	3	P20	mouse
P13439	Umps	uridine monophosphate synthetase	22247	P13439	FB-P5	-1.31784	0.0465036	0.147196	no	-1.31784	0.147196	3	3	3	P5	mouse
Q91YR9	Ptgr1	prostaglandin reductase 1	67103	Q91YR9	FB-P20	-3.44295	5.31833e-06	0.000705404	no	-3.44295	0.000705404	3	3	3	P20	mouse
P13864	Dnmt1	DNA methyltransferase (cytosine-5) 1	13433	P13864	P5-P20	0.0555084	0.857798	0.978601	no	0.0555084	0.978601	3	3	3	P5	mouse
Q9CWK8	Snx2	sorting nexin 2	67804	Q9CWK8	FB-P5	-3.10263	2.44554e-05	0.00206864	no	-3.10263	0.00206864	3	3	3	P5	mouse
P14069	S100a6	S100 calcium binding protein A6 (calcyclin)	20200	P14069	FB-P5	0.310455	0.726704	0.833001	no	0.310455	0.833001	3	2	2	FB	mouse
P14069	S100a6	S100 calcium binding protein A6 (calcyclin)	20200	P14069	FB-P20	0.334445	0.706903	0.803561	no	0.334445	0.803561	3	2	2	FB	mouse
P14069	S100a6	S100 calcium binding protein A6 (calcyclin)	20200	P14069	P5-P20	0.02399	0.980164	0.997073	no	0.02399	0.997073	3	2	2	P5	mouse
Q9DCE5	Pak1ip1	PAK1 interacting protein 1	68083	Q9DCE5	FB-P5	-3.08543	0.000238068	0.00646827	no	-3.08543	0.00646827	3	3	3	P5	mouse
Q9WUM5	Suclg1	succinate-CoA ligase, GDP-forming, alpha subunit	56451	Q9WUM5	FB-P20	-3.43437	0.00554272	0.032693	no	-3.43437	0.032693	3	3	3	P20	mouse
P14094	Atp1b1	ATPase, Na+/K+ transporting, beta 1 polypeptide	11931	P14094	P5-P20	-1.41531	0.0217227	0.412412	no	-1.41531	0.412412	2	3	3	P20	mouse
P14115	Rpl27a	ribosomal protein L27A	26451	P14115	FB-P20	-1.34673	0.033806	0.103947	no	-1.34673	0.103947	3	3	3	P20	mouse
P14115	Rpl27a	ribosomal protein L27A	26451	P14115	P5-P20	-0.099308	0.846642	0.97646	no	-0.099308	0.97646	3	3	3	P20	mouse
P14115	Rpl27a	ribosomal protein L27A	26451	P14115	FB-P5	-1.24742	0.0442897	0.144025	no	-1.24742	0.144025	3	3	3	P5	mouse
P14131	Rps16	ribosomal protein S16	20055	P14131	P5-P20	0.402567	0.343851	0.780086	no	0.402567	0.780086	3	3	3	P5	mouse
P14131	Rps16	ribosomal protein S16	20055	P14131	FB-P5	-0.149429	0.716072	0.824099	no	-0.149429	0.824099	3	3	3	P5	mouse
P14131	Rps16	ribosomal protein S16	20055	P14131	FB-P20	0.253138	0.542154	0.672335	no	0.253138	0.672335	3	3	3	FB	mouse
P14148	Rpl7	ribosomal protein L7	19989	P14148	P5-P20	0.079092	0.702931	0.943574	no	0.079092	0.943574	3	3	3	P5	mouse
P14148	Rpl7	ribosomal protein L7	19989	P14148	FB-P20	-0.245928	0.259859	0.408111	no	-0.245928	0.408111	3	3	3	P20	mouse
P14148	Rpl7	ribosomal protein L7	19989	P14148	FB-P5	-0.32502	0.151236	0.31024	no	-0.32502	0.31024	3	3	3	P5	mouse
P14152	Mdh1	malate dehydrogenase 1, NAD (soluble)	17449	P14152	P5-P20	0.464622	0.129915	0.638219	no	0.464622	0.638219	3	3	3	P5	mouse
P14152	Mdh1	malate dehydrogenase 1, NAD (soluble)	17449	P14152	FB-P20	0.48112	0.119181	0.242349	no	0.48112	0.242349	3	3	3	FB	mouse
P14152	Mdh1	malate dehydrogenase 1, NAD (soluble)	17449	P14152	FB-P5	0.016498	0.952353	0.975276	no	0.016498	0.975276	3	3	3	FB	mouse
P14206	Rpsa	ribosomal protein SA	16785	P14206	FB-P5	0.442294	0.247504	0.428035	no	0.442294	0.428035	3	3	3	FB	mouse
P14206	Rpsa	ribosomal protein SA	16785	P14206	FB-P20	0.718409	0.0826707	0.187584	no	0.718409	0.187584	3	3	3	FB	mouse
P14206	Rpsa	ribosomal protein SA	16785	P14206	P5-P20	0.276114	0.4544	0.844964	no	0.276114	0.844964	3	3	3	P5	mouse
O09167	O09167			O09167	FB-P5	-3.05875	0.00128562	0.018438	no	-3.05875	0.018438	3	3	3	P5	mouse
P14211	Calr	calreticulin	12317	P14211	P5-P20	0.135158	0.604536	0.916932	no	0.135158	0.916932	3	3	3	P5	mouse
Q3UW53	Niban1	niban apoptosis regulator 1	63913	Q3UW53	FB-P20	-3.43141	0.000738265	0.0103075	no	-3.43141	0.0103075	3	3	3	P20	mouse
P14576	Srp54a	signal recognition particle 54A	24067	P14576	FB-P20	-1.53878	0.0141387	0.0589381	no	-1.53878	0.0589381	3	3	3	P20	mouse
P14576	Srp54a	signal recognition particle 54A	24067	P14576	FB-P5	-0.868647	0.101737	0.238425	no	-0.868647	0.238425	3	3	3	P5	mouse
P14576	Srp54a	signal recognition particle 54A	24067	P14576	P5-P20	-0.670137	0.186928	0.688232	no	-0.670137	0.688232	3	3	3	P20	mouse
P14602	Hspb1	heat shock protein 1	15507	P14602	FB-P20	-0.810734	0.289515	0.43614	no	-0.810734	0.43614	3	3	3	P20	mouse
P14602	Hspb1	heat shock protein 1	15507	P14602	FB-P5	-0.91642	0.237155	0.417928	no	-0.91642	0.417928	3	3	3	P5	mouse
P14602	Hspb1	heat shock protein 1	15507	P14602	P5-P20	0.105685	0.884605	0.982377	no	0.105685	0.982377	3	3	3	P5	mouse
P14685	Psmd3	proteasome (prosome, macropain) 26S subunit, non-ATPase, 3	22123	P14685	FB-P5	0.91453	0.0808423	0.205937	no	0.91453	0.205937	3	3	3	FB	mouse
P14685	Psmd3	proteasome (prosome, macropain) 26S subunit, non-ATPase, 3	22123	P14685	P5-P20	0.148996	0.744298	0.956906	no	0.148996	0.956906	3	3	3	P5	mouse
P14685	Psmd3	proteasome (prosome, macropain) 26S subunit, non-ATPase, 3	22123	P14685	FB-P20	1.06353	0.0505863	0.135547	no	1.06353	0.135547	3	3	3	FB	mouse
P14733	Lmnb1	lamin B1	16906	P14733	P5-P20	-0.25635	0.150791	0.661654	no	-0.25635	0.661654	3	3	3	P20	mouse
Q9CQJ4	Rnf2	ring finger protein 2	19821	Q9CQJ4	FB-P5	-3.04743	0.000228477	0.00646827	no	-3.04743	0.00646827	2	3	3	P5	mouse
Q8BY87	Usp47	ubiquitin specific peptidase 47	74996	Q8BY87	FB-P20	-3.42171	0.00230526	0.0192193	no	-3.42171	0.0192193	2	3	3	P20	mouse
Q3U319	Rnf40	ring finger protein 40	233900	Q3U319	FB-P5	-3.02035	0.00712982	0.0456689	no	-3.02035	0.0456689	1	3	3	P5	mouse
P14824	Anxa6	annexin A6	11749	P14824	P5-P20	-0.0793101	0.788806	0.962224	no	-0.0793101	0.962224	3	3	3	P20	mouse
Q99JW5	Epcam	epithelial cell adhesion molecule	17075	Q99JW5	FB-P20	-3.36568	0.0009909	0.0117538	no	-3.36568	0.0117538	3	3	3	P20	mouse
P14869	Rplp0	ribosomal protein, large, P0	11837	P14869	FB-P20	-0.0417134	0.930725	0.961642	no	-0.0417134	0.961642	3	3	3	P20	mouse
P14869	Rplp0	ribosomal protein, large, P0	11837	P14869	P5-P20	0.527156	0.295618	0.755798	no	0.527156	0.755798	3	3	3	P5	mouse
P14869	Rplp0	ribosomal protein, large, P0	11837	P14869	FB-P5	-0.568869	0.262591	0.442603	no	-0.568869	0.442603	3	3	3	P5	mouse
P14901	Hmox1	heme oxygenase 1	15368	P14901	FB-P20	-0.698774	0.199207	0.347658	no	-0.698774	0.347658	2	3	3	P20	mouse
P14901	Hmox1	heme oxygenase 1	15368	P14901	P5-P20	-0.806146	0.114734	0.626382	no	-0.806146	0.626382	2	3	3	P20	mouse
P14901	Hmox1	heme oxygenase 1	15368	P14901	FB-P5	0.107372	0.829224	0.899288	no	0.107372	0.899288	2	3	3	FB	mouse
P15105	Glul	glutamate-ammonia ligase (glutamine synthetase)	14645	P15105	P5-P20	0.853304	0.0494794	0.522267	no	0.853304	0.522267	3	3	3	P5	mouse
Q923D5	Wbp11	WW domain binding protein 11	60321	Q923D5	FB-P5	-2.99373	0.00130941	0.0186048	no	-2.99373	0.0186048	3	3	3	P5	mouse
P15105	Glul	glutamate-ammonia ligase (glutamine synthetase)	14645	P15105	FB-P20	-0.899155	0.0414053	0.119152	no	-0.899155	0.119152	3	3	3	P20	mouse
P15265	Smcp	sperm mitochondria-associated cysteine-rich protein	17235	P15265	P5-P20	1.68384	0.198091	0.698966	no	1.68384	0.698966	0	3	3	P5	mouse
Q8R3V5	Sh3glb2	SH3-domain GRB2-like endophilin B2	227700	Q8R3V5	FB-P5	#NUM!		0	yes	-5.88899	0.0272716	0	2	2	P5	mouse
Q9CXD6	Mcur1	mitochondrial calcium uniporter regulator 1	76137	Q9CXD6	FB-P5	#NUM!		0	yes	-5.89853	0.0110191	0	1	2	P5	mouse
P15327	Bpgm	2,3-bisphosphoglycerate mutase	12183	P15327	P5-P20	-0.156603	0.491421	0.863855	no	-0.156603	0.863855	3	3	3	P20	mouse
Q61191	Hcfc1	host cell factor C1	15161	Q61191	FB-P5	-2.96796	0.000171226	0.00586111	no	-2.96796	0.00586111	3	3	3	P5	mouse
Q99PL5	Rrbp1	ribosome binding protein 1	81910	Q99PL5	FB-P20	-3.35544	0.000124167	0.00441854	no	-3.35544	0.00441854	3	3	3	P20	mouse
P15532	Nme1	NME/NM23 nucleoside diphosphate kinase 1	18102	P15532	P5-P20	2.05662	0.188441	0.690167	no	2.05662	0.690167	2	3	3	P5	mouse
P15532	Nme1	NME/NM23 nucleoside diphosphate kinase 1	18102	P15532	FB-P20	2.27713	0.19204	0.336965	no	2.27713	0.336965	2	3	3	FB	mouse
P15532	Nme1	NME/NM23 nucleoside diphosphate kinase 1	18102	P15532	FB-P5	0.220516	0.889635	0.936869	no	0.220516	0.936869	2	3	3	FB	mouse
P15864	H1f2	H1.2 linker histone, cluster member	50708	P15864	P5-P20	-0.214536	0.999867	0.999867	no	-0.214536	0.999867	1	3	3	P20	mouse
Q91YE3	Egln1	egl-9 family hypoxia-inducible factor 1	112405	Q91YE3	FB-P20	-3.3552	0.0069327	0.0371868	no	-3.3552	0.0371868	1	3	3	P20	mouse
P16045	Lgals1	lectin, galactose binding, soluble 1	16852	P16045	P5-P20	0.113596	0.78207	0.961316	no	0.113596	0.961316	3	3	3	P5	mouse
Q9WVA4	Tagln2	transgelin 2	21346	Q9WVA4	FB-P5	-2.96791	0.00109215	0.0165317	no	-2.96791	0.0165317	3	3	3	P5	mouse
P16110	P16110			P16110	P5-P20	0.198617	0.586874	0.910715	no	0.198617	0.910715	0	3	3	P5	mouse
Q5PSV9	Mdc1	mediator of DNA damage checkpoint 1	240087	Q5PSV9	FB-P20	#NUM!		0	yes	-5.90816	0.0176814	0	2	1	P20	mouse
Q8R0F5	Rbmx2	RNA binding motif protein, X-linked 2	209003	Q8R0F5	FB-P20	#NUM!		0	yes	-5.91746	0.0318579	0	2	3	P20	mouse
Q99KD5	Unc45a	unc-45 myosin chaperone A	101869	Q99KD5	FB-P20	-3.33879	0.00333324	0.0238606	no	-3.33879	0.0238606	3	3	3	P20	mouse
P63168	Dynll1	dynein light chain LC8-type 1	56455	P63168	FB-P5	-2.94325	0.00352983	0.0302136	no	-2.94325	0.0302136	3	3	3	P5	mouse
P16125	Ldhb	lactate dehydrogenase B	16832	P16125	P5-P20	0.0440207	0.884156	0.982377	no	0.0440207	0.982377	3	3	3	P5	mouse
P16254	Srp14	signal recognition particle 14	20813	P16254	FB-P20	-0.577795	0.315803	0.461217	no	-0.577795	0.461217	3	3	3	P20	mouse
P16254	Srp14	signal recognition particle 14	20813	P16254	FB-P5	0.133599	0.808697	0.885402	no	0.133599	0.885402	3	3	3	FB	mouse
P16254	Srp14	signal recognition particle 14	20813	P16254	P5-P20	-0.711394	0.226532	0.721531	no	-0.711394	0.721531	3	3	3	P20	mouse
Q9D1L0	Chchd2	coiled-coil-helix-coiled-coil-helix domain containing 2	14004	Q9D1L0	FB-P5	-2.94036	6.29577e-06	0.00100592	no	-2.94036	0.00100592	3	3	3	P5	mouse
Q8BFR4	Gns	glucosamine (N-acetyl)-6-sulfatase	75612	Q8BFR4	FB-P20	-3.33337	2.68803e-05	0.00156873	no	-3.33337	0.00156873	2	3	3	P20	mouse
P16406	Enpep	glutamyl aminopeptidase	13809	P16406	P5-P20	-1.00002	0.00325504	0.231382	no	-1.00002	0.231382	1	3	3	P20	mouse
P16460	Ass1	argininosuccinate synthetase 1	11898	P16460	P5-P20	0.130358	0.78679	0.961734	no	0.130358	0.961734	3	3	3	P5	mouse
P63094	Gnas	GNAS (guanine nucleotide binding protein, alpha stimulating) complex locus	14683	P63094	FB-P20	-3.30796	0.0039481	0.0264233	no	-3.30796	0.0264233	2	3	3	P20	mouse
O88532	Zfr	zinc finger RNA binding protein	22763	O88532	FB-P5	-2.93593	4.7264e-06	0.000983814	no	-2.93593	0.000983814	3	3	3	P5	mouse
P16546	P16546			P16546	FB-P20	-0.986704	0.0102073	0.0474282	no	-0.986704	0.0474282	3	3	3	P20	mouse
P16546	P16546			P16546	P5-P20	-0.275502	0.342585	0.780086	no	-0.275502	0.780086	3	3	3	P20	mouse
P16546	P16546			P16546	FB-P5	-0.711202	0.0375348	0.128665	no	-0.711202	0.128665	3	3	3	P5	mouse
P16675	Ctsa	cathepsin A	19025	P16675	FB-P20	-1.01326	0.243455	0.393357	no	-1.01326	0.393357	3	3	3	P20	mouse
P16675	Ctsa	cathepsin A	19025	P16675	P5-P20	1.07312	0.219815	0.720192	no	1.07312	0.720192	3	3	3	P5	mouse
P16675	Ctsa	cathepsin A	19025	P16675	FB-P5	-2.08638	0.0373703	0.128407	no	-2.08638	0.128407	3	3	3	P5	mouse
P16858	Gapdh	glyceraldehyde-3-phosphate dehydrogenase	14433	P16858	FB-P20	0.804907	0.24261	0.393079	no	0.804907	0.393079	3	3	3	FB	mouse
P16858	Gapdh	glyceraldehyde-3-phosphate dehydrogenase	14433	P16858	P5-P20	0.33309	0.611046	0.918912	no	0.33309	0.918912	3	3	3	P5	mouse
P16858	Gapdh	glyceraldehyde-3-phosphate dehydrogenase	14433	P16858	FB-P5	0.471817	0.476239	0.643421	no	0.471817	0.643421	3	3	3	FB	mouse
P17047	Lamp2	lysosomal-associated membrane protein 2	16784	P17047	FB-P20	0.165931	0.861516	0.920506	no	0.165931	0.920506	3	3	3	FB	mouse
P17047	Lamp2	lysosomal-associated membrane protein 2	16784	P17047	FB-P5	0.237721	0.802926	0.883128	no	0.237721	0.883128	3	3	3	FB	mouse
P17047	Lamp2	lysosomal-associated membrane protein 2	16784	P17047	P5-P20	-0.0717895	0.939772	0.989842	no	-0.0717895	0.989842	3	3	3	P20	mouse
P17156	Hspa2	heat shock protein 2	15512	P17156	FB-P20	0.741977	0.496952	0.634263	no	0.741977	0.634263	1	3	3	FB	mouse
P17156	Hspa2	heat shock protein 2	15512	P17156	P5-P20	-0.405285	0.595158	0.91412	no	-0.405285	0.91412	1	3	3	P20	mouse
P17156	Hspa2	heat shock protein 2	15512	P17156	FB-P5	1.14726	0.312768	0.493158	no	1.14726	0.493158	1	3	3	FB	mouse
P17182	Eno1	enolase 1, alpha non-neuron	13806	P17182	P5-P20	0.788304	0.0983996	0.610505	no	0.788304	0.610505	3	3	3	P5	mouse
P17182	Eno1	enolase 1, alpha non-neuron	13806	P17182	FB-P5	-1.3788	0.0141591	0.0699686	no	-1.3788	0.0699686	3	3	3	P5	mouse
P17182	Eno1	enolase 1, alpha non-neuron	13806	P17182	FB-P20	-0.590495	0.193452	0.339036	no	-0.590495	0.339036	3	3	3	P20	mouse
P17225	P17225			P17225	FB-P5	-0.245027	0.532078	0.688375	no	-0.245027	0.688375	3	3	3	P5	mouse
P17225	P17225			P17225	P5-P20	0.600134	0.155636	0.668067	no	0.600134	0.668067	3	3	3	P5	mouse
P17225	P17225			P17225	FB-P20	0.355107	0.373862	0.52058	no	0.355107	0.52058	3	3	3	FB	mouse
P17426	Ap2a1	adaptor-related protein complex 2, alpha 1 subunit	11771	P17426	P5-P20	-0.109078	0.915658	0.987485	no	-0.109078	0.987485	2	3	3	P20	mouse
P17426	Ap2a1	adaptor-related protein complex 2, alpha 1 subunit	11771	P17426	FB-P20	-1.05381	0.38008	0.526375	no	-1.05381	0.526375	2	3	3	P20	mouse
P17426	Ap2a1	adaptor-related protein complex 2, alpha 1 subunit	11771	P17426	FB-P5	-0.944734	0.427721	0.602808	no	-0.944734	0.602808	2	3	3	P5	mouse
P17427	Ap2a2	adaptor-related protein complex 2, alpha 2 subunit	11772	P17427	P5-P20	-0.452106	0.486529	0.861639	no	-0.452106	0.861639	3	3	3	P20	mouse
Q5XG71	Q5XG71			Q5XG71	FB-P20	-3.30338	0.000366238	0.00785796	no	-3.30338	0.00785796	3	3	3	P20	mouse
Q7M6Y3	Picalm	phosphatidylinositol binding clathrin assembly protein	233489	Q7M6Y3	FB-P5	-2.91848	0.00032757	0.00783588	no	-2.91848	0.00783588	3	3	3	P5	mouse
P17665	Cox7c	cytochrome c oxidase subunit 7C	12867	P17665	FB-P5	2.15557	0.110797	0.249923	no	2.15557	0.249923	1	1	2	FB	mouse
P17665	Cox7c	cytochrome c oxidase subunit 7C	12867	P17665	P5-P20	-0.225886	0.657823	0.929012	no	-0.225886	0.929012	1	1	2	P20	mouse
P17710	Hk1	hexokinase 1	15275	P17710	P5-P20	1.21615	0.0999016	0.610505	no	1.21615	0.610505	3	3	3	P5	mouse
P17710	Hk1	hexokinase 1	15275	P17710	FB-P20	-1.54361	0.0486353	0.132757	no	-1.54361	0.132757	3	3	3	P20	mouse
P97376	Frg1	FSHD region gene 1	14300	P97376	FB-P5	-2.914	0.00506871	0.0375711	no	-2.914	0.0375711	3	3	3	P5	mouse
P17742	Ppia	peptidylprolyl isomerase A	268373	P17742	FB-P20	-0.561819	0.0185998	0.0690139	no	-0.561819	0.0690139	3	3	3	P20	mouse
P17742	Ppia	peptidylprolyl isomerase A	268373	P17742	P5-P20	0.426824	0.0510858	0.522267	no	0.426824	0.522267	3	3	3	P5	mouse
P17742	Ppia	peptidylprolyl isomerase A	268373	P17742	FB-P5	-0.988643	0.00134197	0.0186048	no	-0.988643	0.0186048	3	3	3	P5	mouse
P17751	Tpi1	triosephosphate isomerase 1	21991	P17751	P5-P20	-0.142798	0.553005	0.896671	no	-0.142798	0.896671	3	3	3	P20	mouse
Q8CI51	Pdlim5	PDZ and LIM domain 5	56376	Q8CI51	FB-P5	-2.90992	0.00604049	0.0412208	no	-2.90992	0.0412208	3	3	3	P5	mouse
E9Q7G0	Numa1	nuclear mitotic apparatus protein 1	101706	E9Q7G0	FB-P20	-3.29153	2.0862e-05	0.00135279	no	-3.29153	0.00135279	3	3	3	P20	mouse
P17809	Slc2a1	solute carrier family 2 (facilitated glucose transporter), member 1	20525	P17809	FB-P20	-1.12722	0.256788	0.405834	no	-1.12722	0.405834	3	3	3	P20	mouse
P17809	Slc2a1	solute carrier family 2 (facilitated glucose transporter), member 1	20525	P17809	FB-P5	-2.16982	0.0524214	0.157538	no	-2.16982	0.157538	3	3	3	P5	mouse
P17809	Slc2a1	solute carrier family 2 (facilitated glucose transporter), member 1	20525	P17809	P5-P20	1.0426	0.290484	0.755798	no	1.0426	0.755798	3	3	3	P5	mouse
P17918	Pcna	proliferating cell nuclear antigen	18538	P17918	P5-P20	0.24219	0.380116	0.810691	no	0.24219	0.810691	3	3	3	P5	mouse
P17918	Pcna	proliferating cell nuclear antigen	18538	P17918	FB-P20	-0.322419	0.25414	0.402595	no	-0.322419	0.402595	3	3	3	P20	mouse
P17918	Pcna	proliferating cell nuclear antigen	18538	P17918	FB-P5	-0.56461	0.0693218	0.187201	no	-0.56461	0.187201	3	3	3	P5	mouse
P18052	Ptpra	protein tyrosine phosphatase, receptor type, A	19262	P18052	P5-P20	-2.3778	0.177101	0.687467	no	-2.3778	0.687467	0	1	2	P20	mouse
Q9D6M3	Slc25a22	solute carrier family 25 (mitochondrial carrier, glutamate), member 22	68267	Q9D6M3	FB-P5	#NUM!		0	yes	-5.92223	0.0382227	0	3	2	P5	mouse
Q8K3A9	Mepce	methylphosphate capping enzyme	231803	Q8K3A9	FB-P20	#NUM!		0	yes	-5.93654	0.0437103	0	2	2	P20	mouse
Q9CWR2	Smyd3	SET and MYND domain containing 3	69726	Q9CWR2	FB-P5	#NUM!		0	yes	-5.96561	0.0271685	0	3	2	P5	mouse
P18155	Mthfd2	methylenetetrahydrofolate dehydrogenase (NAD+ dependent), methenyltetrahydrofolate cyclohydrolase	17768	P18155	P5-P20	-0.683248	0.73598	0.954825	no	-0.683248	0.954825	0	2	2	P20	mouse
Q9Z277	Baz1b	bromodomain adjacent to zinc finger domain, 1B	22385	Q9Z277	FB-P5	-2.8953	0.00169986	0.0206279	no	-2.8953	0.0206279	3	3	3	P5	mouse
Q9JLQ0	Cd2ap	CD2-associated protein	12488	Q9JLQ0	FB-P20	-3.26628	8.47788e-06	0.000963451	no	-3.26628	0.000963451	3	3	3	P20	mouse
P18242	Ctsd	cathepsin D	13033	P18242	P5-P20	0.628181	0.0874157	0.584517	no	0.628181	0.584517	3	3	3	P5	mouse
P18572	Bsg	basigin	12215	P18572	FB-P5	-0.886775	0.0734007	0.192962	no	-0.886775	0.192962	3	3	3	P5	mouse
P18572	Bsg	basigin	12215	P18572	P5-P20	-0.649746	0.163494	0.672827	no	-0.649746	0.672827	3	3	3	P20	mouse
Q8CI51	Pdlim5	PDZ and LIM domain 5	56376	Q8CI51	FB-P20	-3.25631	0.00354378	0.0246796	no	-3.25631	0.0246796	3	3	3	P20	mouse
P18653	Rps6ka1	ribosomal protein S6 kinase polypeptide 1	20111	P18653	FB-P5	-1.78354	0.240203	0.420835	no	-1.78354	0.420835	3	3	3	P5	mouse
P18653	Rps6ka1	ribosomal protein S6 kinase polypeptide 1	20111	P18653	FB-P20	-2.15827	0.165801	0.3039	no	-2.15827	0.3039	3	3	3	P20	mouse
P18653	Rps6ka1	ribosomal protein S6 kinase polypeptide 1	20111	P18653	P5-P20	-0.374729	0.793378	0.963684	no	-0.374729	0.963684	3	3	3	P20	mouse
P18654	Rps6ka3	ribosomal protein S6 kinase polypeptide 3	110651	P18654	FB-P5	2.33519	0.443769	0.617455	no	2.33519	0.617455	2	1	1	FB	mouse
P18654	Rps6ka3	ribosomal protein S6 kinase polypeptide 3	110651	P18654	FB-P20	1.79562	0.527075	0.660371	no	1.79562	0.660371	2	1	1	FB	mouse
P18760	Cfl1	cofilin 1, non-muscle	12631	P18760	FB-P5	-0.357115	0.477414	0.643463	no	-0.357115	0.643463	3	3	3	P5	mouse
P18760	Cfl1	cofilin 1, non-muscle	12631	P18760	FB-P20	-0.25237	0.611662	0.731188	no	-0.25237	0.731188	3	3	3	P20	mouse
P18760	Cfl1	cofilin 1, non-muscle	12631	P18760	P5-P20	0.104745	0.831534	0.97646	no	0.104745	0.97646	3	3	3	P5	mouse
P19001	Krt19	keratin 19	16669	P19001	P5-P20	-0.571097	0.659971	0.929012	no	-0.571097	0.929012	2	3	3	P20	mouse
P19001	Krt19	keratin 19	16669	P19001	FB-P5	-2.08462	0.187649	0.360025	no	-2.08462	0.360025	2	3	3	P5	mouse
P19001	Krt19	keratin 19	16669	P19001	FB-P20	-2.65571	0.109586	0.227434	no	-2.65571	0.227434	2	3	3	P20	mouse
P19096	Fasn	fatty acid synthase	14104	P19096	P5-P20	0.290876	0.506784	0.870514	no	0.290876	0.870514	3	3	3	P5	mouse
P19096	Fasn	fatty acid synthase	14104	P19096	FB-P5	-0.480393	0.287998	0.46875	no	-0.480393	0.46875	3	3	3	P5	mouse
P19096	Fasn	fatty acid synthase	14104	P19096	FB-P20	-0.189517	0.661817	0.772164	no	-0.189517	0.772164	3	3	3	P20	mouse
P26187	Mgmt	O-6-methylguanine-DNA methyltransferase	17314	P26187	FB-P20	#NUM!		0	yes	-5.98291	0.030804	0	2	1	P20	mouse
P19137	Lama1	laminin, alpha 1	16772	P19137	P5-P20	-1.49589	0.0385458	0.493386	no	-1.49589	0.493386	0	3	3	P20	mouse
Q03347	Q03347			Q03347	FB-P5	#NUM!		0	yes	-5.99131	0.0401437	0	3	2	P5	mouse
P19157	Gstp1	glutathione S-transferase, pi 1	14870	P19157	FB-P5	2.93186	0.0285831	0.110213	no	2.93186	0.110213	3	3	3	FB	mouse
P19157	Gstp1	glutathione S-transferase, pi 1	14870	P19157	FB-P20	3.38185	0.0162921	0.0632187	no	3.38185	0.0632187	3	3	3	FB	mouse
P19157	Gstp1	glutathione S-transferase, pi 1	14870	P19157	P5-P20	0.449998	0.675439	0.932664	no	0.449998	0.932664	3	3	3	P5	mouse
P19253	Rpl13a	ribosomal protein L13A	22121	P19253	FB-P20	-0.823642	0.155676	0.290264	no	-0.823642	0.290264	3	3	3	P20	mouse
P19253	Rpl13a	ribosomal protein L13A	22121	P19253	FB-P5	-0.634711	0.257555	0.4383	no	-0.634711	0.4383	3	3	3	P5	mouse
P19253	Rpl13a	ribosomal protein L13A	22121	P19253	P5-P20	-0.188931	0.722441	0.951631	no	-0.188931	0.951631	3	3	3	P20	mouse
Q5U4D8	Slc5a6	solute carrier family 5 (sodium-dependent vitamin transporter), member 6	330064	Q5U4D8	FB-P5	#NUM!		0	yes	-5.99862	0.0378399	0	3	2	P5	mouse
Q8VEH8	Erlec1	endoplasmic reticulum lectin 1	66753	Q8VEH8	FB-P20	#NUM!		0	yes	-6.00034	0.0386874	0	2	2	P20	mouse
P19324	Serpinh1	serine (or cysteine) peptidase inhibitor, clade H, member 1	12406	P19324	P5-P20	0.268974	0.767012	0.958335	no	0.268974	0.958335	0	3	3	P5	mouse
P19426	Nelfe	negative elongation factor complex member E, Rdbp	27632	P19426	FB-P20	-1.58068	0.253408	0.401872	no	-1.58068	0.401872	2	3	3	P20	mouse
P19426	Nelfe	negative elongation factor complex member E, Rdbp	27632	P19426	FB-P5	-2.20723	0.131472	0.281964	no	-2.20723	0.281964	2	3	3	P5	mouse
P19426	Nelfe	negative elongation factor complex member E, Rdbp	27632	P19426	P5-P20	0.626553	0.592204	0.912899	no	0.626553	0.912899	2	3	3	P5	mouse
P19536	P19536			P19536	FB-P5	-0.000889302	0.998824	0.999551	no	-0.000889302	0.999551	3	3	3	P5	mouse
P19536	P19536			P19536	P5-P20	-1.12605	0.0997499	0.610505	no	-1.12605	0.610505	3	3	3	P20	mouse
P19536	P19536			P19536	FB-P20	-1.12694	0.0995377	0.213253	no	-1.12694	0.213253	3	3	3	P20	mouse
P19783	Cox4i1	cytochrome c oxidase subunit 4I1	12857	P19783	P5-P20	-0.231352	0.35517	0.791011	no	-0.231352	0.791011	3	3	3	P20	mouse
P19783	Cox4i1	cytochrome c oxidase subunit 4I1	12857	P19783	FB-P20	-0.642151	0.0319845	0.100248	no	-0.642151	0.100248	3	3	3	P20	mouse
P19783	Cox4i1	cytochrome c oxidase subunit 4I1	12857	P19783	FB-P5	-0.410799	0.125616	0.273277	no	-0.410799	0.273277	3	3	3	P5	mouse
P20029	Hspa5	heat shock protein 5	14828	P20029	FB-P20	-0.474149	0.0128026	0.0551003	no	-0.474149	0.0551003	3	3	3	P20	mouse
P20029	Hspa5	heat shock protein 5	14828	P20029	P5-P20	0.0941648	0.512827	0.872586	no	0.0941648	0.872586	3	3	3	P5	mouse
P20029	Hspa5	heat shock protein 5	14828	P20029	FB-P5	-0.568314	0.00570529	0.0404019	no	-0.568314	0.0404019	3	3	3	P5	mouse
P03975	P03975			P03975	FB-P20	-3.25377	0.000458727	0.00836603	no	-3.25377	0.00836603	3	3	3	P20	mouse
P20060	Hexb	hexosaminidase B	15212	P20060	FB-P5	-1.97402	0.0116412	0.0626966	no	-1.97402	0.0626966	2	3	3	P5	mouse
P20060	Hexb	hexosaminidase B	15212	P20060	P5-P20	-0.525096	0.300685	0.760531	no	-0.525096	0.760531	2	3	3	P20	mouse
P20065	Tmsb4x	thymosin, beta 4, X chromosome	19241	P20065	FB-P20	-2.6881	0.0140852	0.058799	no	-2.6881	0.058799	3	3	3	P20	mouse
P20065	Tmsb4x	thymosin, beta 4, X chromosome	19241	P20065	P5-P20	-0.215261	0.793169	0.963684	no	-0.215261	0.963684	3	3	3	P20	mouse
P20065	Tmsb4x	thymosin, beta 4, X chromosome	19241	P20065	FB-P5	-2.47284	0.0198339	0.0883009	no	-2.47284	0.0883009	3	3	3	P5	mouse
P20108	Prdx3	peroxiredoxin 3	11757	P20108	FB-P20	-0.104448	0.895732	0.94223	no	-0.104448	0.94223	3	3	3	P20	mouse
P20108	Prdx3	peroxiredoxin 3	11757	P20108	FB-P5	-1.12391	0.191682	0.36549	no	-1.12391	0.36549	3	3	3	P5	mouse
P20108	Prdx3	peroxiredoxin 3	11757	P20108	P5-P20	1.01946	0.230495	0.721531	no	1.01946	0.721531	3	3	3	P5	mouse
P20152	Vim	vimentin	22352	P20152	FB-P20	-2.00803	0.131847	0.258728	no	-2.00803	0.258728	1	3	3	P20	mouse
P20152	Vim	vimentin	22352	P20152	P5-P20	-2.63065	0.0248858	0.425243	no	-2.63065	0.425243	1	3	3	P20	mouse
P20152	Vim	vimentin	22352	P20152	FB-P5	0.622622	0.589451	0.731978	no	0.622622	0.731978	1	3	3	FB	mouse
P20239	Zp2	zona pellucida glycoprotein 2	22787	P20239	P5-P20	0.0763622	0.821341	0.974268	no	0.0763622	0.974268	3	3	3	P5	mouse
P20239	Zp2	zona pellucida glycoprotein 2	22787	P20239	FB-P20	0.225512	0.512055	0.64655	no	0.225512	0.64655	3	3	3	FB	mouse
P20239	Zp2	zona pellucida glycoprotein 2	22787	P20239	FB-P5	0.149149	0.661174	0.784139	no	0.149149	0.784139	3	3	3	FB	mouse
P20263	Pou5f1	POU domain, class 5, transcription factor 1	18999	P20263	P5-P20	-0.242024	0.633585	0.925985	no	-0.242024	0.925985	3	3	3	P20	mouse
P20263	Pou5f1	POU domain, class 5, transcription factor 1	18999	P20263	FB-P5	1.48345	0.0217562	0.0935289	no	1.48345	0.0935289	3	3	3	FB	mouse
P20263	Pou5f1	POU domain, class 5, transcription factor 1	18999	P20263	FB-P20	1.24143	0.0420686	0.120467	no	1.24143	0.120467	3	3	3	FB	mouse
Q3TDD9	Ppp1r21	protein phosphatase 1, regulatory subunit 21	73825	Q3TDD9	FB-P5	#NUM!		0	yes	-6.00122	0.0140203	0	2	2	P5	mouse
P20334	Tnfrsf9	tumor necrosis factor receptor superfamily, member 9	21942	P20334	P5-P20	-2.25094	0.315358	0.767647	no	-2.25094	0.767647	0	2	1	P20	mouse
P21107	Tpm3	tropomyosin 3, gamma	59069	P21107	P5-P20	-0.341367	0.477892	0.860022	no	-0.341367	0.860022	3	3	3	P20	mouse
Q9DBR3	Armc8	armadillo repeat containing 8	74125	Q9DBR3	FB-P20	-3.24572	0.002083	0.0180321	no	-3.24572	0.0180321	1	3	3	P20	mouse
Q91YK2	Rrp1b	ribosomal RNA processing 1B	72462	Q91YK2	FB-P5	-2.86149	0.000945628	0.014943	no	-2.86149	0.014943	2	3	3	P5	mouse
P21126	Ubl4a	ubiquitin-like 4A	27643	P21126	P5-P20	-0.0566742	0.978005	0.997073	no	-0.0566742	0.997073	0	3	1	P20	mouse
Q9DBR4	Apbb2	amyloid beta (A4) precursor protein-binding, family B, member 2	11787	Q9DBR4	FB-P20	#NUM!		0	yes	-6.0039	0.0469286	0	2	1	P20	mouse
P21271	P21271			P21271	FB-P5	-0.931149	0.0382722	0.130261	no	-0.931149	0.130261	3	3	3	P5	mouse
P97376	Frg1	FSHD region gene 1	14300	P97376	FB-P20	-3.24053	0.003042	0.0225294	no	-3.24053	0.0225294	3	3	3	P20	mouse
P21271	P21271			P21271	P5-P20	-1.48489	0.00557174	0.263929	no	-1.48489	0.263929	3	3	3	P20	mouse
P21278	Gna11	guanine nucleotide binding protein, alpha 11	14672	P21278	P5-P20	-1.48592	0.0713633	0.562422	no	-1.48592	0.562422	2	3	3	P20	mouse
P21278	Gna11	guanine nucleotide binding protein, alpha 11	14672	P21278	FB-P20	-2.35803	0.0229759	0.0785054	no	-2.35803	0.0785054	2	3	3	P20	mouse
P21278	Gna11	guanine nucleotide binding protein, alpha 11	14672	P21278	FB-P5	-0.872107	0.284634	0.465424	no	-0.872107	0.465424	2	3	3	P5	mouse
P21300	Akr1b7	aldo-keto reductase family 1, member B7	11997	P21300	P5-P20	1.39707	0.0432237	0.504548	no	1.39707	0.504548	0	3	3	P5	mouse
A2A8U2	Tmem201	transmembrane protein 201	230917	A2A8U2	FB-P20	#NUM!		0	yes	-6.01351	0.0304495	0	2	2	P20	mouse
Q03249	Galt	galactose-1-phosphate uridyl transferase	14430	Q03249	FB-P5	#NUM!		0	yes	-6.0197	0.0123943	0	2	2	P5	mouse
P21460	Cst3	cystatin C	13010	P21460	FB-P20	0.776145	0.598075	0.720852	no	0.776145	0.720852	2	2	3	FB	mouse
P21460	Cst3	cystatin C	13010	P21460	P5-P20	0.41121	0.756667	0.958335	no	0.41121	0.958335	2	2	3	P5	mouse
P21460	Cst3	cystatin C	13010	P21460	FB-P5	0.364934	0.783028	0.870173	no	0.364934	0.870173	2	2	3	FB	mouse
P21619	Lmnb2	lamin B2	16907	P21619	P5-P20	-0.444754	0.277358	0.748766	no	-0.444754	0.748766	2	3	3	P20	mouse
Q9D0S9	Hint2	histidine triad nucleotide binding protein 2	68917	Q9D0S9	FB-P20	-3.23541	0.000442189	0.00818785	no	-3.23541	0.00818785	2	3	3	P20	mouse
Q9Z130	Q9Z130			Q9Z130	FB-P5	-2.85305	0.00331673	0.029082	no	-2.85305	0.029082	2	3	3	P5	mouse
P21803	Fgfr2	fibroblast growth factor receptor 2	14183	P21803	FB-P5	-1.5785	0.0720756	0.191548	no	-1.5785	0.191548	1	3	3	P5	mouse
P21803	Fgfr2	fibroblast growth factor receptor 2	14183	P21803	P5-P20	-0.725028	0.189779	0.690167	no	-0.725028	0.690167	1	3	3	P20	mouse
P21803	Fgfr2	fibroblast growth factor receptor 2	14183	P21803	FB-P20	-2.30353	0.0239195	0.0809179	no	-2.30353	0.0809179	1	3	3	P20	mouse
P21956	Mfge8	milk fat globule EGF and factor V/VIII domain containing	17304	P21956	P5-P20	-0.315478	0.562286	0.901601	no	-0.315478	0.901601	3	3	3	P20	mouse
P21956	Mfge8	milk fat globule EGF and factor V/VIII domain containing	17304	P21956	FB-P5	-1.12956	0.0705524	0.188858	no	-1.12956	0.188858	3	3	3	P5	mouse
P21956	Mfge8	milk fat globule EGF and factor V/VIII domain containing	17304	P21956	FB-P20	-1.44504	0.030817	0.0970976	no	-1.44504	0.0970976	3	3	3	P20	mouse
P22727	Wnt6	wingless-type MMTV integration site family, member 6	22420	P22727	P5-P20	-1.25065	0.201125	0.702328	no	-1.25065	0.702328	3	3	3	P20	mouse
P22727	Wnt6	wingless-type MMTV integration site family, member 6	22420	P22727	FB-P5	0.00542989	0.995229	0.99731	no	0.00542989	0.99731	3	3	3	FB	mouse
P22727	Wnt6	wingless-type MMTV integration site family, member 6	22420	P22727	FB-P20	-1.24522	0.202829	0.351541	no	-1.24522	0.351541	3	3	3	P20	mouse
P22892	Ap1g1	adaptor protein complex AP-1, gamma 1 subunit	11765	P22892	FB-P20	0.203555	0.882291	0.932405	no	0.203555	0.932405	2	3	3	FB	mouse
P22892	Ap1g1	adaptor protein complex AP-1, gamma 1 subunit	11765	P22892	P5-P20	0.405427	0.742772	0.956354	no	0.405427	0.956354	2	3	3	P5	mouse
P22892	Ap1g1	adaptor protein complex AP-1, gamma 1 subunit	11765	P22892	FB-P5	-0.201873	0.883254	0.934598	no	-0.201873	0.934598	2	3	3	P5	mouse
P22907	Hmbs	hydroxymethylbilane synthase	15288	P22907	P5-P20	0.460026	0.340243	0.780086	no	0.460026	0.780086	0	3	3	P5	mouse
Q6A009	Ltn1	listerin E3 ubiquitin protein ligase 1	78913	Q6A009	FB-P5	#NUM!		0	yes	-6.02	0.0347497	0	1	2	P5	mouse
Q99JZ7	Errfi1	ERBB receptor feedback inhibitor 1	74155	Q99JZ7	FB-P20	#NUM!		0	yes	-6.02361	0.0327276	0	2	1	P20	mouse
Q99NF3	Cep41	centrosomal protein 41	83922	Q99NF3	FB-P20	#NUM!		0	yes	-6.02717	0.017085	0	2	1	P20	mouse
P22935	Crabp2	cellular retinoic acid binding protein II	12904	P22935	P5-P20	-0.401657	0.724632	0.951631	no	-0.401657	0.951631	0	3	1	P20	mouse
P23116	Eif3a	eukaryotic translation initiation factor 3, subunit A	13669	P23116	FB-P20	-0.857343	0.0078839	0.0403675	no	-0.857343	0.0403675	3	3	3	P20	mouse
P23116	Eif3a	eukaryotic translation initiation factor 3, subunit A	13669	P23116	FB-P5	-0.471	0.075256	0.19676	no	-0.471	0.19676	3	3	3	P5	mouse
P23116	Eif3a	eukaryotic translation initiation factor 3, subunit A	13669	P23116	P5-P20	-0.386343	0.128472	0.638219	no	-0.386343	0.638219	3	3	3	P20	mouse
P23198	P23198			P23198	P5-P20	0.165063	0.524018	0.875243	no	0.165063	0.875243	3	3	3	P5	mouse
P23198	P23198			P23198	FB-P20	-0.364544	0.18586	0.328293	no	-0.364544	0.328293	3	3	3	P20	mouse
P23198	P23198			P23198	FB-P5	-0.529607	0.0730531	0.192224	no	-0.529607	0.192224	3	3	3	P5	mouse
P23242	Gja1	gap junction protein, alpha 1	14609	P23242	FB-P5	-0.161717	0.537473	0.691621	no	-0.161717	0.691621	3	3	3	P5	mouse
O09167	O09167			O09167	FB-P20	-3.23122	0.000966036	0.0116749	no	-3.23122	0.0116749	3	3	3	P20	mouse
P23242	Gja1	gap junction protein, alpha 1	14609	P23242	P5-P20	-0.984273	0.00728898	0.301592	no	-0.984273	0.301592	3	3	3	P20	mouse
Q9D1H7	Get4	golgi to ER traffic protein 4	67604	Q9D1H7	FB-P20	#NUM!		0	yes	-6.03134	0.041478	0	2	1	P20	mouse
Q80TH2	Erbin	Erbb2 interacting protein	59079	Q80TH2	FB-P5	#NUM!		0	yes	-6.04023	0.0110165	0	2	2	P5	mouse
P23249	Mov10	Mov10 RISC complex RNA helicase	17454	P23249	P5-P20	-0.350038	0.55147	0.895867	no	-0.350038	0.895867	0	3	3	P20	mouse
P23475	Xrcc6	X-ray repair complementing defective repair in Chinese hamster cells 6	14375	P23475	FB-P5	-0.499689	0.627815	0.760251	no	-0.499689	0.760251	1	3	3	P5	mouse
P23475	Xrcc6	X-ray repair complementing defective repair in Chinese hamster cells 6	14375	P23475	FB-P20	-2.22506	0.0798657	0.183989	no	-2.22506	0.183989	1	3	3	P20	mouse
P23475	Xrcc6	X-ray repair complementing defective repair in Chinese hamster cells 6	14375	P23475	P5-P20	-1.72537	0.0626411	0.538912	no	-1.72537	0.538912	1	3	3	P20	mouse
P23492	Pnp	purine-nucleoside phosphorylase	18950	P23492	P5-P20	-0.844507	0.395526	0.81747	no	-0.844507	0.81747	1	1	2	P20	mouse
P23492	Pnp	purine-nucleoside phosphorylase	18950	P23492	FB-P5	-1.49162	0.245139	0.425828	no	-1.49162	0.425828	1	1	2	P5	mouse
P23591	Gfus	GDP-L-fucose synthase	22122	P23591	FB-P5	0.520952	0.302416	0.484739	no	0.520952	0.484739	1	2	2	FB	mouse
P23591	Gfus	GDP-L-fucose synthase	22122	P23591	P5-P20	-0.63486	0.176216	0.687467	no	-0.63486	0.687467	1	2	2	P20	mouse
P23591	Gfus	GDP-L-fucose synthase	22122	P23591	FB-P20	-0.113907	0.791787	0.870841	no	-0.113907	0.870841	1	2	2	P20	mouse
P23772	Gata3	GATA binding protein 3	14462	P23772	FB-P5	-2.6213	0.259519	0.439561	no	-2.6213	0.439561	1	3	3	P5	mouse
P23772	Gata3	GATA binding protein 3	14462	P23772	P5-P20	-2.21403	0.191939	0.693072	no	-2.21403	0.693072	1	3	3	P20	mouse
P23772	Gata3	GATA binding protein 3	14462	P23772	FB-P20	-4.83533	0.072642	0.172456	no	-4.83533	0.172456	1	3	3	P20	mouse
Q5SXY1	Q5SXY1			Q5SXY1	FB-P5	#NUM!		0	yes	-6.04134	0.0323591	0	3	2	P5	mouse
Q8VD04	Gripap1	GRIP1 associated protein 1	54645	Q8VD04	FB-P5	#NUM!		0	yes	-6.04588	0.0120091	0	2	2	P5	mouse
P24270	Cat	catalase	12359	P24270	P5-P20	0.345553	0.630991	0.925985	no	0.345553	0.925985	1	3	3	P5	mouse
P24270	Cat	catalase	12359	P24270	FB-P5	-1.1825	0.277322	0.458905	no	-1.1825	0.458905	1	3	3	P5	mouse
P24270	Cat	catalase	12359	P24270	FB-P20	-0.836944	0.424094	0.568655	no	-0.836944	0.568655	1	3	3	P20	mouse
P24288	Bcat1	branched chain aminotransferase 1, cytosolic	12035	P24288	FB-P5	1.03298	0.324955	0.503359	no	1.03298	0.503359	3	3	3	FB	mouse
P24288	Bcat1	branched chain aminotransferase 1, cytosolic	12035	P24288	P5-P20	0.582823	0.567458	0.901842	no	0.582823	0.901842	3	3	3	P5	mouse
P24288	Bcat1	branched chain aminotransferase 1, cytosolic	12035	P24288	FB-P20	1.6158	0.144604	0.276148	no	1.6158	0.276148	3	3	3	FB	mouse
P24369	Ppib	peptidylprolyl isomerase B	19035	P24369	P5-P20	0.300447	0.231348	0.721531	no	0.300447	0.721531	3	3	3	P5	mouse
E9Q557	Dsp	desmoplakin	109620	E9Q557	FB-P5	-2.85279	1.11758e-05	0.00133923	no	-2.85279	0.00133923	3	3	3	P5	mouse
P24369	Ppib	peptidylprolyl isomerase B	19035	P24369	FB-P20	-0.980122	0.00485455	0.0301396	no	-0.980122	0.0301396	3	3	3	P20	mouse
P24452	P24452			P24452	P5-P20	-0.240352	0.749936	0.956949	no	-0.240352	0.956949	3	3	3	P20	mouse
P62862	P62862			P62862	FB-P5	-2.84128	0.00555489	0.0395442	no	-2.84128	0.0395442	2	3	3	P5	mouse
Q60596	Xrcc1	X-ray repair complementing defective repair in Chinese hamster cells 1	22594	Q60596	FB-P20	-3.22736	0.000263604	0.00625654	no	-3.22736	0.00625654	3	3	3	P20	mouse
P24472	Gsta4	glutathione S-transferase, alpha 4	14860	P24472	FB-P5	0.491886	0.464836	0.633888	no	0.491886	0.633888	3	3	3	FB	mouse
P24472	Gsta4	glutathione S-transferase, alpha 4	14860	P24472	FB-P20	1.07461	0.139104	0.268649	no	1.07461	0.268649	3	3	3	FB	mouse
P24472	Gsta4	glutathione S-transferase, alpha 4	14860	P24472	P5-P20	0.582725	0.3909	0.817169	no	0.582725	0.817169	3	3	3	P5	mouse
P24527	Lta4h	leukotriene A4 hydrolase	16993	P24527	P5-P20	-0.117936	0.912927	0.986546	no	-0.117936	0.986546	2	3	3	P20	mouse
P24527	Lta4h	leukotriene A4 hydrolase	16993	P24527	FB-P5	-3.97295	0.0179495	0.0825966	no	-3.97295	0.0825966	2	3	3	P5	mouse
P24527	Lta4h	leukotriene A4 hydrolase	16993	P24527	FB-P20	-4.09088	0.0160837	0.06266	no	-4.09088	0.06266	2	3	3	P20	mouse
P24547	Impdh2	inosine monophosphate dehydrogenase 2	23918	P24547	FB-P5	-0.474471	0.12822	0.27789	no	-0.474471	0.27789	3	3	3	P5	mouse
P24547	Impdh2	inosine monophosphate dehydrogenase 2	23918	P24547	P5-P20	0.348117	0.24321	0.724864	no	0.348117	0.724864	3	3	3	P5	mouse
P24547	Impdh2	inosine monophosphate dehydrogenase 2	23918	P24547	FB-P20	-0.126354	0.655148	0.765713	no	-0.126354	0.765713	3	3	3	P20	mouse
Q9D2Q2	Trmt44	tRNA methyltransferase 44	78890	Q9D2Q2	FB-P5	#NUM!		0	yes	-6.06151	0.0340176	0	1	2	P5	mouse
P24549	Aldh1a1	aldehyde dehydrogenase family 1, subfamily A1	11668	P24549	P5-P20	-0.987028	0.0778794	0.571321	no	-0.987028	0.571321	0	2	1	P20	mouse
P24668	M6pr	mannose-6-phosphate receptor, cation dependent	17113	P24668	FB-P5	-0.75524	0.175668	0.343067	no	-0.75524	0.343067	3	3	3	P5	mouse
P24668	M6pr	mannose-6-phosphate receptor, cation dependent	17113	P24668	P5-P20	0.231207	0.65499	0.929012	no	0.231207	0.929012	3	3	3	P5	mouse
P24668	M6pr	mannose-6-phosphate receptor, cation dependent	17113	P24668	FB-P20	-0.524033	0.327791	0.475159	no	-0.524033	0.475159	3	3	3	P20	mouse
P24788	Cdk11b	cyclin-dependent kinase 11B	12537	P24788	P5-P20	-0.811325	0.259952	0.740311	no	-0.811325	0.740311	3	3	3	P20	mouse
P24788	Cdk11b	cyclin-dependent kinase 11B	12537	P24788	FB-P5	-1.77906	0.0343019	0.121343	no	-1.77906	0.121343	3	3	3	P5	mouse
E9Q6J5	Bod1l	biorientation of chromosomes in cell division 1-like	665775	E9Q6J5	FB-P20	-3.22521	1.99421e-05	0.00135279	no	-3.22521	0.00135279	3	3	3	P20	mouse
P24823	Alppl2	alkaline phosphatase, placental-like 2	11650	P24823	FB-P5	-1.57199	0.144044	0.301069	no	-1.57199	0.301069	3	3	3	P5	mouse
P24823	Alppl2	alkaline phosphatase, placental-like 2	11650	P24823	FB-P20	-2.21207	0.0560194	0.144555	no	-2.21207	0.144555	3	3	3	P20	mouse
P24823	Alppl2	alkaline phosphatase, placental-like 2	11650	P24823	P5-P20	-0.640079	0.519573	0.875071	no	-0.640079	0.875071	3	3	3	P20	mouse
P24860	Ccnb1	cyclin B1	268697	P24860	P5-P20	-0.546464	0.326891	0.776139	no	-0.546464	0.776139	3	3	3	P20	mouse
P24860	Ccnb1	cyclin B1	268697	P24860	FB-P5	0.638308	0.258981	0.439168	no	0.638308	0.439168	3	3	3	FB	mouse
P24860	Ccnb1	cyclin B1	268697	P24860	FB-P20	0.091844	0.863544	0.921581	no	0.091844	0.921581	3	3	3	FB	mouse
P25206	Mcm3	minichromosome maintenance complex component 3	17215	P25206	FB-P5	-0.65127	0.0277321	0.109107	no	-0.65127	0.109107	3	3	3	P5	mouse
P25206	Mcm3	minichromosome maintenance complex component 3	17215	P25206	P5-P20	0.104837	0.658302	0.929012	no	0.104837	0.929012	3	3	3	P5	mouse
P25206	Mcm3	minichromosome maintenance complex component 3	17215	P25206	FB-P20	-0.546434	0.051589	0.136862	no	-0.546434	0.136862	3	3	3	P20	mouse
Q8BT07	Cep55	centrosomal protein 55	74107	Q8BT07	FB-P20	#NUM!		0	yes	-6.06166	0.0291449	0	2	1	P20	mouse
P25425	Pou2f1	POU domain, class 2, transcription factor 1	18986	P25425	P5-P20	1.02414	0.673866	0.932664	no	1.02414	0.932664	0	2	1	P5	mouse
P25444	Rps2	ribosomal protein S2	16898	P25444	P5-P20	0.652258	0.0534052	0.52297	no	0.652258	0.52297	3	3	3	P5	mouse
P25444	Rps2	ribosomal protein S2	16898	P25444	FB-P5	-0.533474	0.0974665	0.231856	no	-0.533474	0.231856	3	3	3	P5	mouse
P25444	Rps2	ribosomal protein S2	16898	P25444	FB-P20	0.118784	0.677543	0.782742	no	0.118784	0.782742	3	3	3	FB	mouse
P25911	Lyn	LYN proto-oncogene, Src family tyrosine kinase	17096	P25911	FB-P5	-0.703658	0.324181	0.503201	no	-0.703658	0.503201	1	3	2	P5	mouse
P25911	Lyn	LYN proto-oncogene, Src family tyrosine kinase	17096	P25911	P5-P20	0.0282289	0.953485	0.990855	no	0.0282289	0.990855	1	3	2	P5	mouse
P25911	Lyn	LYN proto-oncogene, Src family tyrosine kinase	17096	P25911	FB-P20	-0.675429	0.316931	0.462402	no	-0.675429	0.462402	1	3	2	P20	mouse
Q9R118	Htra1	HtrA serine peptidase 1	56213	Q9R118	FB-P20	-3.20841	0.00766668	0.039736	no	-3.20841	0.039736	2	3	3	P20	mouse
Q3U7R1	Esyt1	extended synaptotagmin-like protein 1	23943	Q3U7R1	FB-P5	-2.83635	0.00534658	0.0390808	no	-2.83635	0.0390808	3	3	3	P5	mouse
P25976	P25976			P25976	P5-P20	-0.674777	0.338938	0.780086	no	-0.674777	0.780086	3	3	3	P20	mouse
P26039	Tln1	talin 1	21894	P26039	P5-P20	-0.325382	0.309145	0.765524	no	-0.325382	0.765524	3	3	3	P20	mouse
P59242	P59242			P59242	FB-P20	-3.16834	0.000312936	0.0072472	no	-3.16834	0.0072472	3	3	3	P20	mouse
Q99LC2	Cstf1	cleavage stimulation factor, 3' pre-RNA, subunit 1	67337	Q99LC2	FB-P5	-2.81869	0.000334567	0.00783588	no	-2.81869	0.00783588	3	3	3	P5	mouse
P26040	Ezr	ezrin	22350	P26040	P5-P20	0.199593	0.773893	0.959132	no	0.199593	0.959132	3	3	3	P5	mouse
P26040	Ezr	ezrin	22350	P26040	FB-P5	-2.39349	0.0113084	0.0619487	no	-2.39349	0.0619487	3	3	3	P5	mouse
P26040	Ezr	ezrin	22350	P26040	FB-P20	-2.1939	0.0163322	0.06329	no	-2.1939	0.06329	3	3	3	P20	mouse
P26041	Msn	moesin	17698	P26041	P5-P20	-0.694515	0.143003	0.651126	no	-0.694515	0.651126	3	3	3	P20	mouse
P62627	Dynlrb1	dynein light chain roadblock-type 1	67068	P62627	FB-P5	-2.80899	0.000189268	0.00586111	no	-2.80899	0.00586111	2	3	3	P5	mouse
Q6HA09	Astl	astacin-like metalloendopeptidase (M12 family)	215095	Q6HA09	FB-P20	-3.16746	0.000804677	0.0106774	no	-3.16746	0.0106774	2	3	3	P20	mouse
P26043	Rdx	radixin	19684	P26043	FB-P20	0.339362	0.291189	0.437473	no	0.339362	0.437473	3	3	3	FB	mouse
P26043	Rdx	radixin	19684	P26043	P5-P20	-0.510708	0.132251	0.640188	no	-0.510708	0.640188	3	3	3	P20	mouse
P26043	Rdx	radixin	19684	P26043	FB-P5	0.85007	0.0273854	0.107891	no	0.85007	0.107891	3	3	3	FB	mouse
Q8K3W3	Casc3	cancer susceptibility candidate 3	192160	Q8K3W3	FB-P20	#NUM!		0	yes	-6.06392	0.0156502	0	2	2	P20	mouse
P26187	Mgmt	O-6-methylguanine-DNA methyltransferase	17314	P26187	P5-P20	0.489493	0.586765	0.910715	no	0.489493	0.910715	0	2	1	P5	mouse
P26231	Ctnna1	catenin (cadherin associated protein), alpha 1	12385	P26231	FB-P5	-1.05563	0.045392	0.145431	no	-1.05563	0.145431	3	3	3	P5	mouse
P26231	Ctnna1	catenin (cadherin associated protein), alpha 1	12385	P26231	FB-P20	-1.30815	0.0205669	0.0730098	no	-1.30815	0.0730098	3	3	3	P20	mouse
P26231	Ctnna1	catenin (cadherin associated protein), alpha 1	12385	P26231	P5-P20	-0.252518	0.568958	0.9021	no	-0.252518	0.9021	3	3	3	P20	mouse
P26350	Ptma	prothymosin alpha	19231	P26350	FB-P5	-2.17777	0.0687784	0.186259	no	-2.17777	0.186259	3	3	3	P5	mouse
P26350	Ptma	prothymosin alpha	19231	P26350	P5-P20	-0.208494	0.839165	0.97646	no	-0.208494	0.97646	3	3	3	P20	mouse
P26350	Ptma	prothymosin alpha	19231	P26350	FB-P20	-2.38627	0.0514562	0.136862	no	-2.38627	0.136862	3	3	3	P20	mouse
Q9JHS9	Cwc15	CWC15 spliceosome-associated protein	66070	Q9JHS9	FB-P5	-2.79782	0.00164365	0.0205017	no	-2.79782	0.0205017	3	3	3	P5	mouse
P26369	U2af2	U2 small nuclear ribonucleoprotein auxiliary factor (U2AF) 2	22185	P26369	P5-P20	-0.0246195	0.926285	0.989186	no	-0.0246195	0.989186	3	3	3	P20	mouse
Q11011	Npepps	aminopeptidase puromycin sensitive	19155	Q11011	FB-P20	-3.16672	0.00799728	0.0407261	no	-3.16672	0.0407261	3	3	3	P20	mouse
P26443	Glud1	glutamate dehydrogenase 1	14661	P26443	P5-P20	-0.286189	0.0410682	0.498186	no	-0.286189	0.498186	3	3	3	P20	mouse
P26443	Glud1	glutamate dehydrogenase 1	14661	P26443	FB-P5	-0.594244	0.0016904	0.0206279	no	-0.594244	0.0206279	3	3	3	P5	mouse
P26443	Glud1	glutamate dehydrogenase 1	14661	P26443	FB-P20	-0.880433	0.000206902	0.00567589	no	-0.880433	0.00567589	3	3	3	P20	mouse
P26450	Pik3r1	phosphoinositide-3-kinase regulatory subunit 1	18708	P26450	P5-P20	0.0536133	0.925672	0.989186	no	0.0536133	0.989186	3	3	3	P5	mouse
P26450	Pik3r1	phosphoinositide-3-kinase regulatory subunit 1	18708	P26450	FB-P20	-0.180578	0.754302	0.84106	no	-0.180578	0.84106	3	3	3	P20	mouse
P26450	Pik3r1	phosphoinositide-3-kinase regulatory subunit 1	18708	P26450	FB-P5	-0.234192	0.6857	0.801004	no	-0.234192	0.801004	3	3	3	P5	mouse
P26516	Psmd7	proteasome (prosome, macropain) 26S subunit, non-ATPase, 7	17463	P26516	FB-P5	-1.07898	0.144802	0.301995	no	-1.07898	0.301995	3	3	2	P5	mouse
P26516	Psmd7	proteasome (prosome, macropain) 26S subunit, non-ATPase, 7	17463	P26516	FB-P20	0.114217	0.846131	0.91141	no	0.114217	0.91141	3	3	2	FB	mouse
P26516	Psmd7	proteasome (prosome, macropain) 26S subunit, non-ATPase, 7	17463	P26516	P5-P20	1.1932	0.114459	0.626382	no	1.1932	0.626382	3	3	2	P5	mouse
Q8C551	Rad51ap1	RAD51 associated protein 1	19362	Q8C551	FB-P20	#NUM!		0	yes	-6.07124	0.0318564	0	2	3	P20	mouse
Q5U3K5	Rabl6	RAB, member RAS oncogene family-like 6	227624	Q5U3K5	FB-P5	#NUM!		0	yes	-6.07304	0.0280133	0	2	2	P5	mouse
P26638	Sars	seryl-aminoacyl-tRNA synthetase	20226	P26638	FB-P5	-1.3248	0.0130167	0.0665603	no	-1.3248	0.0665603	3	3	3	P5	mouse
P26638	Sars	seryl-aminoacyl-tRNA synthetase	20226	P26638	P5-P20	0.0363056	0.926963	0.989186	no	0.0363056	0.989186	3	3	3	P5	mouse
P26638	Sars	seryl-aminoacyl-tRNA synthetase	20226	P26638	FB-P20	-1.2885	0.0146339	0.0598904	no	-1.2885	0.0598904	3	3	3	P20	mouse
P26645	Marcks	myristoylated alanine rich protein kinase C substrate	17118	P26645	FB-P5	-1.64896	0.0141387	0.0699686	no	-1.64896	0.0699686	3	3	3	P5	mouse
A2BH40	Arid1a	AT rich interactive domain 1A (SWI-like)	93760	A2BH40	FB-P20	-3.15824	0.00178376	0.0162657	no	-3.15824	0.0162657	2	3	3	P20	mouse
P26645	Marcks	myristoylated alanine rich protein kinase C substrate	17118	P26645	P5-P20	-0.545256	0.301235	0.760531	no	-0.545256	0.760531	3	3	3	P20	mouse
P26883	Fkbp1a	FK506 binding protein 1a	14225	P26883	FB-P5	-0.419952	0.335223	0.513366	no	-0.419952	0.513366	3	3	3	P5	mouse
P26883	Fkbp1a	FK506 binding protein 1a	14225	P26883	P5-P20	0.582877	0.196207	0.69879	no	0.582877	0.69879	3	3	3	P5	mouse
P26883	Fkbp1a	FK506 binding protein 1a	14225	P26883	FB-P20	0.162925	0.698556	0.795864	no	0.162925	0.795864	3	3	3	FB	mouse
Q6IE82	Jade3	jade family PHD finger 3	382207	Q6IE82	FB-P5	#NUM!		0	yes	-6.08187	0.0373254	0	2	2	P5	mouse
P27046	Man2a1	mannosidase 2, alpha 1	17158	P27046	P5-P20	0.71749	0.126903	0.637444	no	0.71749	0.637444	0	3	1	P5	mouse
P27048	Snrpb	small nuclear ribonucleoprotein B	20638	P27048	FB-P5	-0.747933	0.156696	0.316696	no	-0.747933	0.316696	3	3	3	P5	mouse
P27048	Snrpb	small nuclear ribonucleoprotein B	20638	P27048	P5-P20	-0.102141	0.832406	0.97646	no	-0.102141	0.97646	3	3	3	P20	mouse
P27048	Snrpb	small nuclear ribonucleoprotein B	20638	P27048	FB-P20	-0.850074	0.115465	0.236939	no	-0.850074	0.236939	3	3	3	P20	mouse
P27546	Map4	microtubule-associated protein 4	17758	P27546	P5-P20	-0.790476	0.0676756	0.554496	no	-0.790476	0.554496	3	3	3	P20	mouse
P27546	Map4	microtubule-associated protein 4	17758	P27546	FB-P5	-0.379532	0.326356	0.504352	no	-0.379532	0.504352	3	3	3	P5	mouse
P27546	Map4	microtubule-associated protein 4	17758	P27546	FB-P20	-1.17001	0.0165278	0.0638782	no	-1.17001	0.0638782	3	3	3	P20	mouse
Q9JJZ4	Ube2j1	ubiquitin-conjugating enzyme E2J 1	56228	Q9JJZ4	FB-P20	#NUM!		0	yes	-6.08445	0.0458655	0	2	2	P20	mouse
Q9JKC7	Ap4m1	adaptor-related protein complex AP-4, mu 1	11781	Q9JKC7	FB-P20	#NUM!		0	yes	-6.08613	0.0458598	0	2	1	P20	mouse
P27601	Gna13	guanine nucleotide binding protein, alpha 13	14674	P27601	P5-P20	-1.55359	0.012786	0.354191	no	-1.55359	0.354191	0	2	2	P20	mouse
P27612	Plaa	phospholipase A2, activating protein	18786	P27612	P5-P20	-0.0446512	0.843878	0.97646	no	-0.0446512	0.97646	3	3	3	P20	mouse
Q8BK58	Hspbap1	Hspb associated protein 1	66667	Q8BK58	FB-P5	-2.79583	0.00726506	0.0461243	no	-2.79583	0.0461243	2	3	3	P5	mouse
A2AQ25	Etl4	enhancer trap locus 4	208618	A2AQ25	FB-P20	-3.15275	0.000403312	0.00789383	no	-3.15275	0.00789383	3	3	3	P20	mouse
P27641	Xrcc5	X-ray repair complementing defective repair in Chinese hamster cells 5	22596	P27641	P5-P20	0.256762	0.833441	0.97646	no	0.256762	0.97646	1	3	3	P5	mouse
P27641	Xrcc5	X-ray repair complementing defective repair in Chinese hamster cells 5	22596	P27641	FB-P20	-0.154854	0.928363	0.959944	no	-0.154854	0.959944	1	3	3	P20	mouse
P27641	Xrcc5	X-ray repair complementing defective repair in Chinese hamster cells 5	22596	P27641	FB-P5	-0.411615	0.811748	0.887338	no	-0.411615	0.887338	1	3	3	P5	mouse
Q9JMA9	Slc6a14	solute carrier family 6 (neurotransmitter transporter), member 14	56774	Q9JMA9	FB-P20	-3.15264	0.00261832	0.0205937	no	-3.15264	0.0205937	2	3	3	P20	mouse
Q91YW3	Dnajc3	DnaJ heat shock protein family (Hsp40) member C3	100037258	Q91YW3	FB-P5	-2.79572	0.00666782	0.0439831	no	-2.79572	0.0439831	3	3	3	P5	mouse
P27659	Rpl3	ribosomal protein L3	27367	P27659	P5-P20	-0.0754368	0.770359	0.958335	no	-0.0754368	0.958335	3	3	3	P20	mouse
Q8BYW9	Eogt	EGF domain-specific O-linked N-acetylglucosamine (GlcNAc) transferase	101351	Q8BYW9	FB-P20	#NUM!		0	yes	-6.09477	0.0254706	0	2	1	P20	mouse
P27661	H2ax	H2A.X variant histone	15270	P27661	P5-P20	-0.0598446	0.899757	0.984529	no	-0.0598446	0.984529	0	3	3	P20	mouse
Q9WUN2	Tbk1	TANK-binding kinase 1	56480	Q9WUN2	FB-P5	#NUM!		0	yes	-6.10891	0.0242673	0	1	2	P5	mouse
P27773	Pdia3	protein disulfide isomerase associated 3	14827	P27773	P5-P20	-0.263141	0.0488304	0.522267	no	-0.263141	0.522267	3	3	3	P20	mouse
Q61792	Lasp1	LIM and SH3 protein 1	16796	Q61792	FB-P20	-3.14704	0.000425961	0.00801906	no	-3.14704	0.00801906	3	3	3	P20	mouse
P27773	Pdia3	protein disulfide isomerase associated 3	14827	P27773	FB-P5	-0.93228	0.000124877	0.00505838	no	-0.93228	0.00505838	3	3	3	P5	mouse
Q9DBT5	Ampd2	adenosine monophosphate deaminase 2	109674	Q9DBT5	FB-P5	#NUM!		0	yes	-6.11917	0.0423004	0	2	2	P5	mouse
Q3UG98	Nat9	N-acetyltransferase 9 (GCN5-related, putative)	66176	Q3UG98	FB-P5	#NUM!		0	yes	-6.12204	0.0471859	0	1	2	P5	mouse
P28271	Aco1	aconitase 1	11428	P28271	P5-P20	0.773722	0.705682	0.944301	no	0.773722	0.944301	3	3	3	P5	mouse
P28271	Aco1	aconitase 1	11428	P28271	FB-P20	1.47087	0.479866	0.617909	no	1.47087	0.617909	3	3	3	FB	mouse
P28271	Aco1	aconitase 1	11428	P28271	FB-P5	0.697145	0.733338	0.838268	no	0.697145	0.838268	3	3	3	FB	mouse
P28352	Apex1	apurinic/apyrimidinic endonuclease 1	11792	P28352	FB-P20	0.0175282	0.976535	0.985314	no	0.0175282	0.985314	3	3	3	FB	mouse
P28352	Apex1	apurinic/apyrimidinic endonuclease 1	11792	P28352	P5-P20	0.784115	0.219276	0.720192	no	0.784115	0.720192	3	3	3	P5	mouse
P28352	Apex1	apurinic/apyrimidinic endonuclease 1	11792	P28352	FB-P5	-0.766587	0.228482	0.408106	no	-0.766587	0.408106	3	3	3	P5	mouse
P28474	Adh5	alcohol dehydrogenase 5 (class III), chi polypeptide	11532	P28474	P5-P20	0.694518	0.138684	0.645899	no	0.694518	0.645899	3	3	3	P5	mouse
P28474	Adh5	alcohol dehydrogenase 5 (class III), chi polypeptide	11532	P28474	FB-P20	-0.614973	0.181405	0.322769	no	-0.614973	0.322769	3	3	3	P20	mouse
P28474	Adh5	alcohol dehydrogenase 5 (class III), chi polypeptide	11532	P28474	FB-P5	-1.30949	0.0181696	0.0833425	no	-1.30949	0.0833425	3	3	3	P5	mouse
P28574	P28574			P28574	P5-P20	-1.47399	0.0581486	0.538274	no	-1.47399	0.538274	1	3	3	P20	mouse
P28574	P28574			P28574	FB-P5	-0.540787	0.532425	0.688514	no	-0.540787	0.688514	1	3	3	P5	mouse
P28574	P28574			P28574	FB-P20	-2.01478	0.0638058	0.158509	no	-2.01478	0.158509	1	3	3	P20	mouse
P28656	Nap1l1	nucleosome assembly protein 1-like 1	53605	P28656	FB-P5	1.12679	0.494525	0.656961	no	1.12679	0.656961	3	3	3	FB	mouse
P28656	Nap1l1	nucleosome assembly protein 1-like 1	53605	P28656	FB-P20	1.99469	0.245444	0.394873	no	1.99469	0.394873	3	3	3	FB	mouse
P28656	Nap1l1	nucleosome assembly protein 1-like 1	53605	P28656	P5-P20	0.867906	0.595705	0.91412	no	0.867906	0.91412	3	3	3	P5	mouse
P28658	Atxn10	ataxin 10	54138	P28658	FB-P20	-2.20105	0.0130121	0.0556735	no	-2.20105	0.0556735	3	3	3	P20	mouse
P28658	Atxn10	ataxin 10	54138	P28658	FB-P5	-1.68631	0.0369068	0.127419	no	-1.68631	0.127419	3	3	3	P5	mouse
P28658	Atxn10	ataxin 10	54138	P28658	P5-P20	-0.514742	0.445809	0.838744	no	-0.514742	0.838744	3	3	3	P20	mouse
P28659	Celf1	CUGBP, Elav-like family member 1	13046	P28659	FB-P20	-2.04313	0.0142088	0.0590176	no	-2.04313	0.0590176	3	3	3	P20	mouse
P28659	Celf1	CUGBP, Elav-like family member 1	13046	P28659	P5-P20	-0.485123	0.448247	0.839395	no	-0.485123	0.839395	3	3	3	P20	mouse
P28659	Celf1	CUGBP, Elav-like family member 1	13046	P28659	FB-P5	-1.55801	0.0403849	0.134585	no	-1.55801	0.134585	3	3	3	P5	mouse
P28660	Nckap1	NCK-associated protein 1	50884	P28660	FB-P5	-1.93573	0.0944039	0.226255	no	-1.93573	0.226255	2	3	3	P5	mouse
P28660	Nckap1	NCK-associated protein 1	50884	P28660	FB-P20	-1.47726	0.17669	0.317476	no	-1.47726	0.317476	2	3	3	P20	mouse
P28660	Nckap1	NCK-associated protein 1	50884	P28660	P5-P20	0.458463	0.608822	0.91853	no	0.458463	0.91853	2	3	3	P5	mouse
P28667	Marcksl1	MARCKS-like 1	17357	P28667	P5-P20	-0.798751	0.19284	0.694252	no	-0.798751	0.694252	3	3	3	P20	mouse
P28667	Marcksl1	MARCKS-like 1	17357	P28667	FB-P20	-1.68483	0.0212894	0.0744425	no	-1.68483	0.0744425	3	3	3	P20	mouse
P28667	Marcksl1	MARCKS-like 1	17357	P28667	FB-P5	-0.886081	0.154865	0.314321	no	-0.886081	0.314321	3	3	3	P5	mouse
P28740	Kif2a	kinesin family member 2A	16563	P28740	FB-P20	-0.109162	0.921431	0.956505	no	-0.109162	0.956505	3	3	3	P20	mouse
P28740	Kif2a	kinesin family member 2A	16563	P28740	P5-P20	-0.758099	0.501882	0.866945	no	-0.758099	0.866945	3	3	3	P20	mouse
P28740	Kif2a	kinesin family member 2A	16563	P28740	FB-P5	0.648937	0.563348	0.711233	no	0.648937	0.711233	3	3	3	FB	mouse
P28798	P28798			P28798	FB-P20	-0.544224	0.52352	0.657817	no	-0.544224	0.657817	3	3	3	P20	mouse
P28798	P28798			P28798	FB-P5	-0.195561	0.815847	0.890803	no	-0.195561	0.890803	3	3	3	P5	mouse
P28798	P28798			P28798	P5-P20	-0.348664	0.679561	0.932961	no	-0.348664	0.932961	3	3	3	P20	mouse
P28867	Prkcd	protein kinase C, delta	18753	P28867	P5-P20	-1.8389	0.0600002	0.538912	no	-1.8389	0.538912	1	3	3	P20	mouse
P28867	Prkcd	protein kinase C, delta	18753	P28867	FB-P5	2.95101	0.0419197	0.138417	no	2.95101	0.138417	1	3	3	FB	mouse
P28867	Prkcd	protein kinase C, delta	18753	P28867	FB-P20	1.11211	0.328397	0.4758	no	1.11211	0.4758	1	3	3	FB	mouse
P29341	Pabpc1	poly(A) binding protein, cytoplasmic 1	18458	P29341	P5-P20	0.245005	0.132453	0.640188	no	0.245005	0.640188	3	3	3	P5	mouse
P29341	Pabpc1	poly(A) binding protein, cytoplasmic 1	18458	P29341	FB-P5	-0.689542	0.00271651	0.0263267	no	-0.689542	0.0263267	3	3	3	P5	mouse
P29341	Pabpc1	poly(A) binding protein, cytoplasmic 1	18458	P29341	FB-P20	-0.444537	0.0196239	0.071222	no	-0.444537	0.071222	3	3	3	P20	mouse
P29351	Ptpn6	protein tyrosine phosphatase, non-receptor type 6	15170	P29351	FB-P5	0.716584	0.545858	0.698348	no	0.716584	0.698348	2	3	3	FB	mouse
P29351	Ptpn6	protein tyrosine phosphatase, non-receptor type 6	15170	P29351	FB-P20	1.29066	0.296118	0.440345	no	1.29066	0.440345	2	3	3	FB	mouse
P29351	Ptpn6	protein tyrosine phosphatase, non-receptor type 6	15170	P29351	P5-P20	0.574071	0.587096	0.910715	no	0.574071	0.910715	2	3	3	P5	mouse
P29391	P29391			P29391	FB-P20	0.363518	0.687861	0.789829	no	0.363518	0.789829	2	3	0	FB	mouse
O35445	Rnf5	ring finger protein 5	54197	O35445	FB-P5	#NUM!		0	yes	-6.12246	0.0423358	0	2	2	P5	mouse
Q7TPE5	Slc7a6os	solute carrier family 7, member 6 opposite strand	66432	Q7TPE5	FB-P20	#NUM!		0	yes	-6.12964	0.02386	0	2	1	P20	mouse
P29416	Hexa	hexosaminidase A	15211	P29416	FB-P20	-0.435094	0.660356	0.770767	no	-0.435094	0.770767	1	3	3	P20	mouse
P29416	Hexa	hexosaminidase A	15211	P29416	P5-P20	0.0300021	0.965364	0.995358	no	0.0300021	0.995358	1	3	3	P5	mouse
P29416	Hexa	hexosaminidase A	15211	P29416	FB-P5	-0.465096	0.639178	0.767547	no	-0.465096	0.767547	1	3	3	P5	mouse
P29595	Nedd8	neural precursor cell expressed, developmentally down-regulated gene 8	18002	P29595	P5-P20	-0.612672	0.672404	0.932664	no	-0.612672	0.932664	3	3	3	P20	mouse
P29595	Nedd8	neural precursor cell expressed, developmentally down-regulated gene 8	18002	P29595	FB-P5	2.87116	0.0824945	0.208118	no	2.87116	0.208118	3	3	3	FB	mouse
P29595	Nedd8	neural precursor cell expressed, developmentally down-regulated gene 8	18002	P29595	FB-P20	2.25848	0.152576	0.286129	no	2.25848	0.286129	3	3	3	FB	mouse
P29699	Ahsg	alpha-2-HS-glycoprotein	11625	P29699	FB-P5	2.89248	0.241515	0.421073	no	2.89248	0.421073	2	1	1	FB	mouse
P29699	Ahsg	alpha-2-HS-glycoprotein	11625	P29699	FB-P20	2.29441	0.296492	0.44047	no	2.29441	0.44047	2	1	1	FB	mouse
Q3V1H1	Ckap2	cytoskeleton associated protein 2	80986	Q3V1H1	FB-P20	-3.13105	1.14714e-05	0.00104604	no	-3.13105	0.00104604	3	3	3	P20	mouse
P29758	Oat	ornithine aminotransferase	18242	P29758	FB-P5	-1.22023	0.0812322	0.206564	no	-1.22023	0.206564	1	3	3	P5	mouse
P29758	Oat	ornithine aminotransferase	18242	P29758	P5-P20	-1.52257	0.0149506	0.373957	no	-1.52257	0.373957	1	3	3	P20	mouse
P29788	Vtn	vitronectin	22370	P29788	P5-P20	-0.256584	0.691502	0.941448	no	-0.256584	0.941448	3	3	2	P20	mouse
P29788	Vtn	vitronectin	22370	P29788	FB-P5	1.56297	0.0505136	0.154901	no	1.56297	0.154901	3	3	2	FB	mouse
P29788	Vtn	vitronectin	22370	P29788	FB-P20	1.30639	0.0620547	0.155563	no	1.30639	0.155563	3	3	2	FB	mouse
P30275	Ckmt1	creatine kinase, mitochondrial 1, ubiquitous	12716	P30275	P5-P20	1.11536	0.0018179	0.224074	no	1.11536	0.224074	3	3	3	P5	mouse
Q91YK2	Rrp1b	ribosomal RNA processing 1B	72462	Q91YK2	FB-P20	-3.12602	0.000628071	0.00955693	no	-3.12602	0.00955693	2	3	3	P20	mouse
Q9DBR7	Ppp1r12a	protein phosphatase 1, regulatory subunit 12A	17931	Q9DBR7	FB-P5	-2.78416	0.000170733	0.00586111	no	-2.78416	0.00586111	3	3	3	P5	mouse
Q8BG81	Poldip3	polymerase (DNA-directed), delta interacting protein 3	73826	Q8BG81	FB-P5	-2.76523	0.000115698	0.00482243	no	-2.76523	0.00482243	3	3	3	P5	mouse
P30416	Fkbp4	FK506 binding protein 4	14228	P30416	P5-P20	0.375083	0.0448208	0.508385	no	0.375083	0.508385	3	3	3	P5	mouse
Q3UPW2	Elf3	E74-like factor 3	13710	Q3UPW2	FB-P20	-3.12198	0.000694488	0.0100822	no	-3.12198	0.0100822	3	3	3	P20	mouse
P17710	Hk1	hexokinase 1	15275	P17710	FB-P5	-2.75975	0.00451355	0.0347085	no	-2.75975	0.0347085	3	3	3	P5	mouse
P30681	Hmgb2	high mobility group box 2	97165	P30681	P5-P20	0.542981	0.101741	0.610566	no	0.542981	0.610566	3	3	3	P5	mouse
P30681	Hmgb2	high mobility group box 2	97165	P30681	FB-P20	-0.997523	0.012116	0.0528469	no	-0.997523	0.0528469	3	3	3	P20	mouse
P30999	Ctnnd1	catenin (cadherin associated protein), delta 1	12388	P30999	FB-P20	-0.665619	0.021052	0.0741009	no	-0.665619	0.0741009	3	3	3	P20	mouse
P30999	Ctnnd1	catenin (cadherin associated protein), delta 1	12388	P30999	FB-P5	-0.580514	0.0353061	0.12383	no	-0.580514	0.12383	3	3	3	P5	mouse
P30999	Ctnnd1	catenin (cadherin associated protein), delta 1	12388	P30999	P5-P20	-0.0851057	0.705334	0.944301	no	-0.0851057	0.944301	3	3	3	P20	mouse
P31230	P31230			P31230	P5-P20	-0.0324216	0.94183	0.989842	no	-0.0324216	0.989842	3	3	3	P20	mouse
P31230	P31230			P31230	FB-P5	-1.32166	0.02108	0.0914422	no	-1.32166	0.0914422	3	3	3	P5	mouse
P31230	P31230			P31230	FB-P20	-1.35408	0.0191379	0.0701563	no	-1.35408	0.0701563	3	3	3	P20	mouse
P31266	Rbpj	recombination signal binding protein for immunoglobulin kappa J region	19664	P31266	P5-P20	-0.0167542	0.987395	0.998407	no	-0.0167542	0.998407	1	3	3	P20	mouse
P31266	Rbpj	recombination signal binding protein for immunoglobulin kappa J region	19664	P31266	FB-P5	1.03875	0.502083	0.664514	no	1.03875	0.664514	1	3	3	FB	mouse
P31266	Rbpj	recombination signal binding protein for immunoglobulin kappa J region	19664	P31266	FB-P20	1.02199	0.508598	0.643577	no	1.02199	0.643577	1	3	3	FB	mouse
G5E8B9	Zbtb11	zinc finger and BTB domain containing 11	271377	G5E8B9	FB-P5	#NUM!		0	yes	-6.13345	0.0285953	0	2	2	P5	mouse
P31750	Akt1	thymoma viral proto-oncogene 1	11651	P31750	P5-P20	-1.94254	0.0986778	0.610505	no	-1.94254	0.610505	0	2	3	P20	mouse
Q9Z0R6	Q9Z0R6			Q9Z0R6	FB-P5	#NUM!		0	yes	-6.14875	0.0315066	0	2	2	P5	mouse
P31786	Dbi	diazepam binding inhibitor	13167	P31786	P5-P20	-0.302594	0.268813	0.740446	no	-0.302594	0.740446	3	3	3	P20	mouse
P31786	Dbi	diazepam binding inhibitor	13167	P31786	FB-P5	-0.671995	0.0353057	0.12383	no	-0.671995	0.12383	3	3	3	P5	mouse
P31786	Dbi	diazepam binding inhibitor	13167	P31786	FB-P20	-0.974588	0.00776523	0.0401043	no	-0.974588	0.0401043	3	3	3	P20	mouse
P31938	Map2k1	mitogen-activated protein kinase kinase 1	26395	P31938	P5-P20	-0.252472	0.780108	0.961316	no	-0.252472	0.961316	3	2	3	P20	mouse
P31938	Map2k1	mitogen-activated protein kinase kinase 1	26395	P31938	FB-P5	0.40746	0.617733	0.753116	no	0.40746	0.753116	3	2	3	FB	mouse
P31938	Map2k1	mitogen-activated protein kinase kinase 1	26395	P31938	FB-P20	0.154989	0.863567	0.921581	no	0.154989	0.921581	3	2	3	FB	mouse
P32020	Scp2	sterol carrier protein 2, liver	20280	P32020	FB-P20	0.195097	0.653722	0.76486	no	0.195097	0.76486	3	3	3	FB	mouse
P32020	Scp2	sterol carrier protein 2, liver	20280	P32020	P5-P20	0.131176	0.761813	0.958335	no	0.131176	0.958335	3	3	3	P5	mouse
P32020	Scp2	sterol carrier protein 2, liver	20280	P32020	FB-P5	0.0639214	0.882215	0.933843	no	0.0639214	0.933843	3	3	3	FB	mouse
P32037	Slc2a3	solute carrier family 2 (facilitated glucose transporter), member 3	20527	P32037	P5-P20	-0.510503	0.224713	0.721531	no	-0.510503	0.721531	3	3	3	P20	mouse
P32037	Slc2a3	solute carrier family 2 (facilitated glucose transporter), member 3	20527	P32037	FB-P5	-1.00275	0.0376114	0.128774	no	-1.00275	0.128774	3	3	3	P5	mouse
Q9EP71	Rai14	retinoic acid induced 14	75646	Q9EP71	FB-P20	-3.10896	0.00297745	0.0222775	no	-3.10896	0.0222775	1	3	3	P20	mouse
P32067	Ssb	Sjogren syndrome antigen B	20823	P32067	FB-P20	-0.635821	0.345051	0.49211	no	-0.635821	0.49211	3	3	3	P20	mouse
P32067	Ssb	Sjogren syndrome antigen B	20823	P32067	P5-P20	-0.148589	0.818721	0.974069	no	-0.148589	0.974069	3	3	3	P20	mouse
P32067	Ssb	Sjogren syndrome antigen B	20823	P32067	FB-P5	-0.487232	0.462208	0.632146	no	-0.487232	0.632146	3	3	3	P5	mouse
P32233	Drg1	developmentally regulated GTP binding protein 1	13494	P32233	P5-P20	-0.154911	0.800831	0.967986	no	-0.154911	0.967986	3	3	3	P20	mouse
P32233	Drg1	developmentally regulated GTP binding protein 1	13494	P32233	FB-P5	-0.308691	0.618093	0.753235	no	-0.308691	0.753235	3	3	3	P5	mouse
P32233	Drg1	developmentally regulated GTP binding protein 1	13494	P32233	FB-P20	-0.463602	0.460042	0.599463	no	-0.463602	0.599463	3	3	3	P20	mouse
Q9ERI5	Jmjd6	jumonji domain containing 6	107817	Q9ERI5	FB-P20	-3.1088	0.00400662	0.0265406	no	-3.1088	0.0265406	2	3	3	P20	mouse
Q8VE09	Ttc39c	tetratricopeptide repeat domain 39C	72747	Q8VE09	P5-P20	#NUM!		0	yes	-6.149	0.0275052	1	2	0	P20	mouse
Q9D3E6	Stag1	stromal antigen 1	20842	Q9D3E6	FB-P5	#NUM!		0	yes	-6.15304	0.0380653	0	3	2	P5	mouse
E9PVX6	Mki67	antigen identified by monoclonal antibody Ki 67	17345	E9PVX6	FB-P20	-3.1062	0.000206448	0.00567589	no	-3.1062	0.00567589	3	3	3	P20	mouse
P32507	Nectin2	nectin cell adhesion molecule 2	19294	P32507	FB-P5	-0.951071	0.164133	0.326677	no	-0.951071	0.326677	3	3	3	P5	mouse
P32507	Nectin2	nectin cell adhesion molecule 2	19294	P32507	P5-P20	-2.05079	0.0141957	0.365935	no	-2.05079	0.365935	3	3	3	P20	mouse
Q9CPW4	Arpc5	actin related protein 2/3 complex, subunit 5	67771	Q9CPW4	FB-P5	-2.73465	0.00598209	0.0410609	no	-2.73465	0.0410609	3	3	3	P5	mouse
Q8R4N0	Clybl	citrate lyase beta like	69634	Q8R4N0	FB-P20	-3.10229	0.00944964	0.0448278	no	-3.10229	0.0448278	2	3	3	P20	mouse
P32921	Wars	tryptophanyl-tRNA synthetase	22375	P32921	P5-P20	0.56256	0.146033	0.653231	no	0.56256	0.653231	3	3	3	P5	mouse
Q6P5D8	Smchd1	SMC hinge domain containing 1	74355	Q6P5D8	FB-P20	-3.08103	0.000800124	0.0106774	no	-3.08103	0.0106774	3	3	2	P20	mouse
P33174	Kif4	kinesin family member 4	16571	P33174	P5-P20	0.223992	0.728664	0.953738	no	0.223992	0.953738	3	3	3	P5	mouse
P61514	Rpl37a	ribosomal protein L37a	19981	P61514	FB-P5	-2.71673	0.000433359	0.00913672	no	-2.71673	0.00913672	3	3	3	P5	mouse
P33215	Nedd1	neural precursor cell expressed, developmentally down-regulated gene 1	17997	P33215	P5-P20	-1.09257	0.446064	0.838799	no	-1.09257	0.838799	1	3	2	P20	mouse
P33215	Nedd1	neural precursor cell expressed, developmentally down-regulated gene 1	17997	P33215	FB-P5	-0.898001	0.629193	0.761278	no	-0.898001	0.761278	1	3	2	P5	mouse
P33215	Nedd1	neural precursor cell expressed, developmentally down-regulated gene 1	17997	P33215	FB-P20	-1.99057	0.296753	0.44047	no	-1.99057	0.44047	1	3	2	P20	mouse
P33609	Pola1	polymerase (DNA directed), alpha 1	18968	P33609	P5-P20	-1.61123	0.00348765	0.235384	no	-1.61123	0.235384	0	3	3	P20	mouse
Q9CQ89	Cuta	cutA divalent cation tolerance homolog	67675	Q9CQ89	FB-P20	#NUM!		0	yes	-6.15685	0.0372737	0	2	2	P20	mouse
Q61526	Erbb3	erb-b2 receptor tyrosine kinase 3	13867	Q61526	FB-P20	#NUM!		0	yes	-6.17934	0.0454743	0	2	3	P20	mouse
P34022	Ranbp1	RAN binding protein 1	19385	P34022	FB-P5	-0.519642	0.399847	0.579181	no	-0.519642	0.579181	3	3	3	P5	mouse
P34022	Ranbp1	RAN binding protein 1	19385	P34022	FB-P20	-1.57143	0.0337427	0.103947	no	-1.57143	0.103947	3	3	3	P20	mouse
P34022	Ranbp1	RAN binding protein 1	19385	P34022	P5-P20	-1.05178	0.116369	0.629037	no	-1.05178	0.629037	3	3	3	P20	mouse
P34056	Tfap2a	transcription factor AP-2, alpha	21418	P34056	FB-P5	-2.4182	0.224564	0.404158	no	-2.4182	0.404158	1	3	3	P5	mouse
P34056	Tfap2a	transcription factor AP-2, alpha	21418	P34056	P5-P20	-0.437289	0.732192	0.953983	no	-0.437289	0.953983	1	3	3	P20	mouse
P34056	Tfap2a	transcription factor AP-2, alpha	21418	P34056	FB-P20	-2.85549	0.165378	0.303314	no	-2.85549	0.303314	1	3	3	P20	mouse
P34884	Mif	macrophage migration inhibitory factor (glycosylation-inhibiting factor)	17319	P34884	P5-P20	0.973018	0.101479	0.610566	no	0.973018	0.610566	3	3	3	P5	mouse
P34884	Mif	macrophage migration inhibitory factor (glycosylation-inhibiting factor)	17319	P34884	FB-P5	-1.17792	0.0578783	0.169197	no	-1.17792	0.169197	3	3	3	P5	mouse
P34884	Mif	macrophage migration inhibitory factor (glycosylation-inhibiting factor)	17319	P34884	FB-P20	-0.204902	0.698148	0.795864	no	-0.204902	0.795864	3	3	3	P20	mouse
P60330	Espl1	extra spindle pole bodies 1, separase	105988	P60330	FB-P20	#NUM!		0	yes	-6.18062	0.0463544	0	2	3	P20	mouse
P35123	Usp4	ubiquitin specific peptidase 4 (proto-oncogene)	22258	P35123	P5-P20	-0.632435	0.488444	0.86219	no	-0.632435	0.86219	0	3	3	P20	mouse
Q9DCL2	Ciao2a	cytosolic iron-sulfur assembly component 2A	68250	Q9DCL2	FB-P5	#NUM!		0	yes	-6.18283	0.0427615	0	1	2	P5	mouse
P35235	Ptpn11	protein tyrosine phosphatase, non-receptor type 11	19247	P35235	FB-P20	-0.0216863	0.953508	0.975071	no	-0.0216863	0.975071	3	3	3	P20	mouse
P35235	Ptpn11	protein tyrosine phosphatase, non-receptor type 11	19247	P35235	P5-P20	-0.0636116	0.864367	0.978601	no	-0.0636116	0.978601	3	3	3	P20	mouse
P35235	Ptpn11	protein tyrosine phosphatase, non-receptor type 11	19247	P35235	FB-P5	0.0419253	0.910295	0.952265	no	0.0419253	0.952265	3	3	3	FB	mouse
P35278	Rab5c	RAB5C, member RAS oncogene family	19345	P35278	P5-P20	-1.18879	0.487834	0.86219	no	-1.18879	0.86219	2	3	3	P20	mouse
P35278	Rab5c	RAB5C, member RAS oncogene family	19345	P35278	FB-P20	-0.0167673	0.992831	0.996245	no	-0.0167673	0.996245	2	3	3	P20	mouse
P35278	Rab5c	RAB5C, member RAS oncogene family	19345	P35278	FB-P5	1.17203	0.538401	0.692195	no	1.17203	0.692195	2	3	3	FB	mouse
P35279	Rab6a	RAB6A, member RAS oncogene family	19346	P35279	FB-P20	-0.958533	0.36662	0.513339	no	-0.958533	0.513339	3	3	3	P20	mouse
P35279	Rab6a	RAB6A, member RAS oncogene family	19346	P35279	P5-P20	-0.640054	0.53861	0.885674	no	-0.640054	0.885674	3	3	3	P20	mouse
P35279	Rab6a	RAB6A, member RAS oncogene family	19346	P35279	FB-P5	-0.318479	0.75666	0.856475	no	-0.318479	0.856475	3	3	3	P5	mouse
P35282	Rab21	RAB21, member RAS oncogene family	216344	P35282	FB-P20	-0.797009	0.339655	0.487033	no	-0.797009	0.487033	3	3	2	P20	mouse
P35282	Rab21	RAB21, member RAS oncogene family	216344	P35282	FB-P5	0.0547487	0.950823	0.97489	no	0.0547487	0.97489	3	3	2	FB	mouse
P35282	Rab21	RAB21, member RAS oncogene family	216344	P35282	P5-P20	-0.851758	0.359466	0.796621	no	-0.851758	0.796621	3	3	2	P20	mouse
P35283	Rab12	RAB12, member RAS oncogene family	19328	P35283	FB-P5	-1.10476	0.233846	0.413726	no	-1.10476	0.413726	1	2	2	P5	mouse
P35283	Rab12	RAB12, member RAS oncogene family	19328	P35283	FB-P20	-1.49452	0.150117	0.283339	no	-1.49452	0.283339	1	2	2	P20	mouse
P35283	Rab12	RAB12, member RAS oncogene family	19328	P35283	P5-P20	-0.38976	0.542061	0.888166	no	-0.38976	0.888166	1	2	2	P20	mouse
P35285	Rab22a	RAB22A, member RAS oncogene family	19334	P35285	P5-P20	0.359643	0.611495	0.918912	no	0.359643	0.918912	1	2	3	P5	mouse
P35285	Rab22a	RAB22A, member RAS oncogene family	19334	P35285	FB-P5	1.5685	0.146494	0.304639	no	1.5685	0.304639	1	2	3	FB	mouse
P35285	Rab22a	RAB22A, member RAS oncogene family	19334	P35285	FB-P20	1.92814	0.109103	0.226754	no	1.92814	0.226754	1	2	3	FB	mouse
P35293	Rab18	RAB18, member RAS oncogene family	19330	P35293	P5-P20	0.752967	0.343028	0.780086	no	0.752967	0.780086	3	3	3	P5	mouse
P35293	Rab18	RAB18, member RAS oncogene family	19330	P35293	FB-P20	-0.503529	0.516962	0.652182	no	-0.503529	0.652182	3	3	3	P20	mouse
P35293	Rab18	RAB18, member RAS oncogene family	19330	P35293	FB-P5	-1.2565	0.13667	0.290084	no	-1.2565	0.290084	3	3	3	P5	mouse
P35486	Pdha1	pyruvate dehydrogenase E1 alpha 1	18597	P35486	FB-P5	-0.428769	0.00481682	0.0362648	no	-0.428769	0.0362648	3	3	3	P5	mouse
P35486	Pdha1	pyruvate dehydrogenase E1 alpha 1	18597	P35486	FB-P20	-0.639207	0.000638227	0.00955693	no	-0.639207	0.00955693	3	3	3	P20	mouse
P35486	Pdha1	pyruvate dehydrogenase E1 alpha 1	18597	P35486	P5-P20	-0.210438	0.0766254	0.568867	no	-0.210438	0.568867	3	3	3	P20	mouse
P35550	Fbl	fibrillarin	14113	P35550	P5-P20	-0.4047	0.40226	0.81895	no	-0.4047	0.81895	3	3	3	P20	mouse
P35550	Fbl	fibrillarin	14113	P35550	FB-P20	-0.607327	0.225036	0.374587	no	-0.607327	0.374587	3	3	3	P20	mouse
P35550	Fbl	fibrillarin	14113	P35550	FB-P5	-0.202627	0.66772	0.787679	no	-0.202627	0.787679	3	3	3	P5	mouse
P35564	Canx	calnexin	12330	P35564	FB-P5	-0.876131	0.0285858	0.110213	no	-0.876131	0.110213	3	3	3	P5	mouse
O88532	Zfr	zinc finger RNA binding protein	22763	O88532	FB-P20	-3.07234	3.61939e-06	0.000667799	no	-3.07234	0.000667799	3	3	3	P20	mouse
P35564	Canx	calnexin	12330	P35564	P5-P20	-0.414793	0.223682	0.721531	no	-0.414793	0.721531	3	3	3	P20	mouse
P35585	Ap1m1	adaptor-related protein complex AP-1, mu subunit 1	11767	P35585	FB-P5	1.6547	0.0166794	0.0781269	no	1.6547	0.0781269	3	3	3	FB	mouse
P35585	Ap1m1	adaptor-related protein complex AP-1, mu subunit 1	11767	P35585	FB-P20	0.608602	0.272171	0.419837	no	0.608602	0.419837	3	3	3	FB	mouse
P35585	Ap1m1	adaptor-related protein complex AP-1, mu subunit 1	11767	P35585	P5-P20	-1.0461	0.0829715	0.584517	no	-1.0461	0.584517	3	3	3	P20	mouse
P35601	Rfc1	replication factor C (activator 1) 1	19687	P35601	P5-P20	-2.92825	0.00113277	0.22403	no	-2.92825	0.22403	1	3	3	P20	mouse
P35601	Rfc1	replication factor C (activator 1) 1	19687	P35601	FB-P20	-2.22095	0.0110777	0.0501936	no	-2.22095	0.0501936	1	3	3	P20	mouse
P35601	Rfc1	replication factor C (activator 1) 1	19687	P35601	FB-P5	0.707306	0.2277	0.407001	no	0.707306	0.407001	1	3	3	FB	mouse
Q9QZQ1	Afdn	afadin, adherens junction formation factor	17356	Q9QZQ1	FB-P20	-3.07072	0.00100842	0.0117707	no	-3.07072	0.0117707	3	3	3	P20	mouse
O08795	Prkcsh	protein kinase C substrate 80K-H	19089	O08795	FB-P5	-2.71257	0.000234108	0.00646827	no	-2.71257	0.00646827	3	3	3	P5	mouse
P35700	Prdx1	peroxiredoxin 1	18477	P35700	P5-P20	0.652413	0.0173681	0.401233	no	0.652413	0.401233	3	3	3	P5	mouse
P35761	P35761			P35761	FB-P5	2.06917	0.0975883	0.231954	no	2.06917	0.231954	1	3	2	FB	mouse
P35761	P35761			P35761	FB-P20	1.87114	0.106631	0.222886	no	1.87114	0.222886	1	3	2	FB	mouse
P35761	P35761			P35761	P5-P20	-0.198031	0.779859	0.961316	no	-0.198031	0.961316	1	3	2	P20	mouse
P35821	Ptpn1	protein tyrosine phosphatase, non-receptor type 1	19246	P35821	FB-P5	-0.326848	0.522306	0.680322	no	-0.326848	0.680322	3	2	3	P5	mouse
P35821	Ptpn1	protein tyrosine phosphatase, non-receptor type 1	19246	P35821	P5-P20	-1.77264	0.0206574	0.412412	no	-1.77264	0.412412	3	2	3	P20	mouse
Q78PY7	Snd1	staphylococcal nuclease and tudor domain containing 1	56463	Q78PY7	FB-P20	-3.0537	0.000735269	0.0103075	no	-3.0537	0.0103075	3	3	3	P20	mouse
Q9QY06	Q9QY06			Q9QY06	FB-P20	#NUM!		0	yes	-6.19035	0.0345297	0	2	1	P20	mouse
P35831	Ptpn12	protein tyrosine phosphatase, non-receptor type 12	19248	P35831	P5-P20	2.78783	0.620083	0.923001	no	2.78783	0.923001	0	3	1	P5	mouse
P35846	Folr1	folate receptor 1 (adult)	14275	P35846	P5-P20	-1.67556	0.112598	0.623574	no	-1.67556	0.623574	1	3	3	P20	mouse
P35846	Folr1	folate receptor 1 (adult)	14275	P35846	FB-P5	-3.09968	0.0568919	0.16696	no	-3.09968	0.16696	1	3	3	P5	mouse
P35846	Folr1	folate receptor 1 (adult)	14275	P35846	FB-P20	-4.77524	0.015039	0.0604458	no	-4.77524	0.0604458	1	3	3	P20	mouse
P35922	P35922			P35922	P5-P20	-0.569245	0.157897	0.669478	no	-0.569245	0.669478	3	3	3	P20	mouse
Q60648	Gm2a	GM2 ganglioside activator protein	14667	Q60648	FB-P5	-2.70776	0.0030474	0.0279118	no	-2.70776	0.0279118	3	3	3	P5	mouse
Q6IRU2	Tpm4	tropomyosin 4	326618	Q6IRU2	FB-P20	-3.04866	0.00100846	0.0117707	no	-3.04866	0.0117707	3	3	3	P20	mouse
O35445	Rnf5	ring finger protein 5	54197	O35445	FB-P20	#NUM!		0	yes	-6.19098	0.0278998	0	2	2	P20	mouse
P35951	Ldlr	low density lipoprotein receptor	16835	P35951	P5-P20	-0.0840817	0.908574	0.985949	no	-0.0840817	0.985949	0	3	3	P20	mouse
Q80TV8	Clasp1	CLIP associating protein 1	76707	Q80TV8	FB-P5	#NUM!		0	yes	-6.20005	0.0205619	0	3	2	P5	mouse
P35979	Rpl12	ribosomal protein L12	269261	P35979	FB-P20	0.0742138	0.672961	0.778995	no	0.0742138	0.778995	3	3	3	FB	mouse
P35979	Rpl12	ribosomal protein L12	269261	P35979	FB-P5	-0.232397	0.214267	0.394011	no	-0.232397	0.394011	3	3	3	P5	mouse
P35979	Rpl12	ribosomal protein L12	269261	P35979	P5-P20	0.306611	0.116628	0.629037	no	0.306611	0.629037	3	3	3	P5	mouse
P35980	Rpl18	ribosomal protein L18	19899	P35980	FB-P5	-0.939615	0.0122985	0.0648022	no	-0.939615	0.0648022	3	3	3	P5	mouse
P35980	Rpl18	ribosomal protein L18	19899	P35980	P5-P20	0.565548	0.0774795	0.570642	no	0.565548	0.570642	3	3	3	P5	mouse
P35980	Rpl18	ribosomal protein L18	19899	P35980	FB-P20	-0.374067	0.209012	0.355964	no	-0.374067	0.355964	3	3	3	P20	mouse
B2RRD7	Brpf1	bromodomain and PHD finger containing, 1	78783	B2RRD7	FB-P5	#NUM!		0	yes	-6.20415	0.0108421	0	3	2	P5	mouse
P51879	Ocm	oncomodulin	18261	P51879	FB-P5	#NUM!		0	yes	-6.20898	0.0354567	0	1	2	P5	mouse
P36552	Cpox	coproporphyrinogen oxidase	12892	P36552	FB-P20	-0.712241	0.455327	0.595959	no	-0.712241	0.595959	2	3	0	P20	mouse
P36916	Gnl1	guanine nucleotide binding protein-like 1	14670	P36916	P5-P20	-0.0875648	0.886793	0.982377	no	-0.0875648	0.982377	1	3	3	P20	mouse
P36916	Gnl1	guanine nucleotide binding protein-like 1	14670	P36916	FB-P5	-0.540582	0.544126	0.697374	no	-0.540582	0.697374	1	3	3	P5	mouse
P36916	Gnl1	guanine nucleotide binding protein-like 1	14670	P36916	FB-P20	-0.628147	0.48462	0.621865	no	-0.628147	0.621865	1	3	3	P20	mouse
P36993	Ppm1b	protein phosphatase 1B, magnesium dependent, beta isoform	19043	P36993	FB-P20	-0.894989	0.439118	0.58288	no	-0.894989	0.58288	1	3	3	P20	mouse
P36993	Ppm1b	protein phosphatase 1B, magnesium dependent, beta isoform	19043	P36993	P5-P20	-0.849034	0.313677	0.767647	no	-0.849034	0.767647	1	3	3	P20	mouse
P36993	Ppm1b	protein phosphatase 1B, magnesium dependent, beta isoform	19043	P36993	FB-P5	-0.0459544	0.966961	0.98172	no	-0.0459544	0.98172	1	3	3	P5	mouse
P37040	Por	cytochrome p450 oxidoreductase	18984	P37040	FB-P5	-1.05723	0.13237	0.283045	no	-1.05723	0.283045	3	3	3	P5	mouse
P37040	Por	cytochrome p450 oxidoreductase	18984	P37040	FB-P20	-1.02648	0.14196	0.272382	no	-1.02648	0.272382	3	3	3	P20	mouse
P37040	Por	cytochrome p450 oxidoreductase	18984	P37040	P5-P20	0.0307523	0.96126	0.993374	no	0.0307523	0.993374	3	3	3	P5	mouse
Q6NZQ2	Ddx31	DEAD/H box helicase 31	227674	Q6NZQ2	FB-P5	#NUM!		0	yes	-6.21475	0.0121002	0	1	2	P5	mouse
A6PWY4	Wdr76	WD repeat domain 76	241627	A6PWY4	FB-P5	#NUM!		0	yes	-6.24311	0.0280435	0	2	2	P5	mouse
Q9CPW4	Arpc5	actin related protein 2/3 complex, subunit 5	67771	Q9CPW4	FB-P20	-3.04812	0.00357572	0.0247536	no	-3.04812	0.0247536	3	3	3	P20	mouse
P37913	Lig1	ligase I, DNA, ATP-dependent	16881	P37913	P5-P20	0.0668327	0.914487	0.987082	no	0.0668327	0.987082	3	3	3	P5	mouse
Q04736	Yes1	YES proto-oncogene 1, Src family tyrosine kinase	22612	Q04736	FB-P5	-2.7071	0.000110269	0.00473336	no	-2.7071	0.00473336	1	3	3	P5	mouse
P38060	Hmgcl	3-hydroxy-3-methylglutaryl-Coenzyme A lyase	15356	P38060	P5-P20	1.65811	0.049911	0.522267	no	1.65811	0.522267	2	3	3	P5	mouse
P38060	Hmgcl	3-hydroxy-3-methylglutaryl-Coenzyme A lyase	15356	P38060	FB-P20	0.00130584	0.998624	0.99972	no	0.00130584	0.99972	2	3	3	FB	mouse
P38060	Hmgcl	3-hydroxy-3-methylglutaryl-Coenzyme A lyase	15356	P38060	FB-P5	-1.6568	0.0698858	0.188018	no	-1.6568	0.188018	2	3	3	P5	mouse
P38532	Hsf1	heat shock factor 1	15499	P38532	P5-P20	-0.188482	0.730615	0.953983	no	-0.188482	0.953983	0	3	1	P20	mouse
P58059	Mrps21	mitochondrial ribosomal protein S21	66292	P58059	FB-P5	#NUM!		0	yes	-6.24355	0.0275962	0	1	2	P5	mouse
P38585	Ttl	tubulin tyrosine ligase	69737	P38585	FB-P20	-0.7047	0.4582	0.598222	no	-0.7047	0.598222	1	2	2	P20	mouse
P38585	Ttl	tubulin tyrosine ligase	69737	P38585	P5-P20	-0.217196	0.763572	0.958335	no	-0.217196	0.958335	1	2	2	P20	mouse
P38585	Ttl	tubulin tyrosine ligase	69737	P38585	FB-P5	-0.487505	0.592725	0.733826	no	-0.487505	0.733826	1	2	2	P5	mouse
P38647	Hspa9	heat shock protein 9	15526	P38647	P5-P20	-0.208805	0.430023	0.831243	no	-0.208805	0.831243	3	3	3	P20	mouse
P38647	Hspa9	heat shock protein 9	15526	P38647	FB-P5	-0.567515	0.0611663	0.174956	no	-0.567515	0.174956	3	3	3	P5	mouse
P38647	Hspa9	heat shock protein 9	15526	P38647	FB-P20	-0.77632	0.0199368	0.0718538	no	-0.77632	0.0718538	3	3	3	P20	mouse
P39054	Dnm2	dynamin 2	13430	P39054	P5-P20	-1.62794	0.0871322	0.584517	no	-1.62794	0.584517	3	3	3	P20	mouse
P39054	Dnm2	dynamin 2	13430	P39054	FB-P5	0.401766	0.632164	0.762947	no	0.401766	0.762947	3	3	3	FB	mouse
P39054	Dnm2	dynamin 2	13430	P39054	FB-P20	-1.22617	0.17485	0.315726	no	-1.22617	0.315726	3	3	3	P20	mouse
P39447	Tjp1	tight junction protein 1	21872	P39447	P5-P20	0.0430539	0.788152	0.962129	no	0.0430539	0.962129	3	3	3	P5	mouse
Q6P5D8	Smchd1	SMC hinge domain containing 1	74355	Q6P5D8	FB-P5	-2.69151	0.0024437	0.02466	no	-2.69151	0.02466	3	3	2	P5	mouse
Q9QUR7	Pin1	protein (peptidyl-prolyl cis/trans isomerase) NIMA-interacting 1	23988	Q9QUR7	FB-P20	-3.04234	0.00361392	0.0248713	no	-3.04234	0.0248713	3	3	3	P20	mouse
P39689	Cdkn1a	cyclin-dependent kinase inhibitor 1A (P21)	12575	P39689	P5-P20	-0.960401	0.659934	0.929012	no	-0.960401	0.929012	0	1	2	P20	mouse
Q09324	Gcnt1	glucosaminyl (N-acetyl) transferase 1, core 2	14537	Q09324	FB-P5	#NUM!		0	yes	-6.24979	0.0480529	0	2	2	P5	mouse
P39749	P39749			P39749	P5-P20	1.44717	0.162226	0.669485	no	1.44717	0.669485	3	3	3	P5	mouse
P37913	Lig1	ligase I, DNA, ATP-dependent	16881	P37913	FB-P5	-2.68811	0.00408539	0.0333795	no	-2.68811	0.0333795	3	3	3	P5	mouse
P39749	P39749			P39749	FB-P20	-2.24869	0.0480931	0.132267	no	-2.24869	0.132267	3	3	3	P20	mouse
P40124	Cap1	CAP, adenylate cyclase-associated protein 1 (yeast)	12331	P40124	P5-P20	-0.147505	0.604757	0.916932	no	-0.147505	0.916932	3	3	3	P20	mouse
Q6Y7W8	Gigyf2	GRB10 interacting GYF protein 2	227331	Q6Y7W8	FB-P5	-2.673	0.00256885	0.025564	no	-2.673	0.025564	3	3	3	P5	mouse
O88379	O88379			O88379	FB-P20	-3.03467	0.00235671	0.019485	no	-3.03467	0.019485	2	3	2	P20	mouse
P40142	Tkt	transketolase	21881	P40142	FB-P20	0.414979	0.041972	0.120425	no	0.414979	0.120425	3	3	3	FB	mouse
P40142	Tkt	transketolase	21881	P40142	P5-P20	0.250363	0.171089	0.684914	no	0.250363	0.684914	3	3	3	P5	mouse
P40142	Tkt	transketolase	21881	P40142	FB-P5	0.164616	0.346198	0.525416	no	0.164616	0.525416	3	3	3	FB	mouse
P40201	Chd1	chromodomain helicase DNA binding protein 1	12648	P40201	P5-P20	1.20296	0.285742	0.754899	no	1.20296	0.754899	0	2	1	P5	mouse
Q505K2	Fam160a1	family with sequence similarity 160, member A1	229488	Q505K2	FB-P5	#NUM!		0	yes	-6.25508	0.0449003	0	2	2	P5	mouse
P97393	P97393			P97393	FB-P20	#NUM!		0	yes	-6.25876	0.0170516	0	2	3	P20	mouse
O35904	Pik3cd	phosphatidylinositol-4,5-bisphosphate 3-kinase catalytic subunit delta	18707	O35904	P5-P20	#NUM!		0	yes	-6.26564	0.04407	3	2	0	P20	mouse
P40237	Cd82	CD82 antigen	12521	P40237	P5-P20	-1.26839	0.265944	0.740446	no	-1.26839	0.740446	0	3	2	P20	mouse
P40240	Cd9	CD9 antigen	12527	P40240	P5-P20	-2.08265	0.140504	0.646284	no	-2.08265	0.646284	2	3	2	P20	mouse
P40240	Cd9	CD9 antigen	12527	P40240	FB-P5	0.480343	0.718992	0.826137	no	0.480343	0.826137	2	3	2	FB	mouse
P40240	Cd9	CD9 antigen	12527	P40240	FB-P20	-1.60231	0.230985	0.379599	no	-1.60231	0.379599	2	3	2	P20	mouse
P40336	Vps26a	VPS26 retromer complex component A	30930	P40336	FB-P5	-0.00790123	0.988553	0.993389	no	-0.00790123	0.993389	3	3	3	P5	mouse
P40336	Vps26a	VPS26 retromer complex component A	30930	P40336	FB-P20	0.521408	0.361823	0.508574	no	0.521408	0.508574	3	3	3	FB	mouse
P40336	Vps26a	VPS26 retromer complex component A	30930	P40336	P5-P20	0.529309	0.355112	0.791011	no	0.529309	0.791011	3	3	3	P5	mouse
P40630	Tfam	transcription factor A, mitochondrial	21780	P40630	P5-P20	-0.967219	0.0501266	0.522267	no	-0.967219	0.522267	3	3	3	P20	mouse
P40630	Tfam	transcription factor A, mitochondrial	21780	P40630	FB-P5	0.908231	0.0614422	0.175131	no	0.908231	0.175131	3	3	3	FB	mouse
P40630	Tfam	transcription factor A, mitochondrial	21780	P40630	FB-P20	-0.0589884	0.886346	0.935629	no	-0.0589884	0.935629	3	3	3	P20	mouse
P41105	Rpl28	ribosomal protein L28	19943	P41105	FB-P5	-0.701769	0.138289	0.292396	no	-0.701769	0.292396	3	3	3	P5	mouse
P41105	Rpl28	ribosomal protein L28	19943	P41105	FB-P20	-1.27159	0.021201	0.0742671	no	-1.27159	0.0742671	3	3	3	P20	mouse
P41105	Rpl28	ribosomal protein L28	19943	P41105	P5-P20	-0.569822	0.214551	0.718522	no	-0.569822	0.718522	3	3	3	P20	mouse
P41183	Bcl6	B cell leukemia/lymphoma 6	12053	P41183	P5-P20	0.406214	0.369063	0.80585	no	0.406214	0.80585	1	1	3	P5	mouse
P41183	Bcl6	B cell leukemia/lymphoma 6	12053	P41183	FB-P5	-1.96174	0.0309206	0.11564	no	-1.96174	0.11564	1	1	3	P5	mouse
P41216	Acsl1	acyl-CoA synthetase long-chain family member 1	14081	P41216	FB-P5	2.28673	0.0115729	0.0625782	no	2.28673	0.0625782	3	3	3	FB	mouse
P41216	Acsl1	acyl-CoA synthetase long-chain family member 1	14081	P41216	P5-P20	-0.340757	0.612392	0.918912	no	-0.340757	0.918912	3	3	3	P20	mouse
P41216	Acsl1	acyl-CoA synthetase long-chain family member 1	14081	P41216	FB-P20	1.94597	0.0224887	0.0773845	no	1.94597	0.0773845	3	3	3	FB	mouse
P41241	Csk	c-src tyrosine kinase	12988	P41241	P5-P20	0.925297	0.205383	0.707521	no	0.925297	0.707521	1	3	3	P5	mouse
P41241	Csk	c-src tyrosine kinase	12988	P41241	FB-P20	-0.497931	0.596177	0.719456	no	-0.497931	0.719456	1	3	3	P20	mouse
P41241	Csk	c-src tyrosine kinase	12988	P41241	FB-P5	-1.42323	0.175709	0.343067	no	-1.42323	0.343067	1	3	3	P5	mouse
P41731	Cd63	CD63 antigen	12512	P41731	FB-P5	-0.386836	0.594407	0.734643	no	-0.386836	0.734643	2	3	3	P5	mouse
P41731	Cd63	CD63 antigen	12512	P41731	P5-P20	-0.764363	0.264791	0.740446	no	-0.764363	0.740446	2	3	3	P20	mouse
P41731	Cd63	CD63 antigen	12512	P41731	FB-P20	-1.1512	0.151586	0.285373	no	-1.1512	0.285373	2	3	3	P20	mouse
P42125	Eci1	enoyl-Coenzyme A delta isomerase 1	13177	P42125	P5-P20	-0.276787	0.823208	0.974739	no	-0.276787	0.974739	1	3	3	P20	mouse
P42125	Eci1	enoyl-Coenzyme A delta isomerase 1	13177	P42125	FB-P20	0.194451	0.911398	0.951846	no	0.194451	0.951846	1	3	3	FB	mouse
P42125	Eci1	enoyl-Coenzyme A delta isomerase 1	13177	P42125	FB-P5	0.471238	0.788271	0.872957	no	0.471238	0.872957	1	3	3	FB	mouse
P42128	Foxk1	forkhead box K1	17425	P42128	P5-P20	0.281129	0.647571	0.929012	no	0.281129	0.929012	2	2	3	P5	mouse
P42128	Foxk1	forkhead box K1	17425	P42128	FB-P20	-0.341724	0.613134	0.732047	no	-0.341724	0.732047	2	2	3	P20	mouse
P42128	Foxk1	forkhead box K1	17425	P42128	FB-P5	-0.622853	0.33572	0.513854	no	-0.622853	0.513854	2	2	3	P5	mouse
P42208	Septin2	septin 2	18000	P42208	P5-P20	0.0748616	0.930096	0.989186	no	0.0748616	0.989186	3	3	3	P5	mouse
P42208	Septin2	septin 2	18000	P42208	FB-P20	-1.13483	0.214885	0.362318	no	-1.13483	0.362318	3	3	3	P20	mouse
P42208	Septin2	septin 2	18000	P42208	FB-P5	-1.2097	0.189864	0.363493	no	-1.2097	0.363493	3	3	3	P5	mouse
P42227	Stat3	signal transducer and activator of transcription 3	20848	P42227	FB-P20	-1.16522	0.0541875	0.141469	no	-1.16522	0.141469	3	3	3	P20	mouse
P42227	Stat3	signal transducer and activator of transcription 3	20848	P42227	FB-P5	-1.32858	0.0345244	0.121831	no	-1.32858	0.121831	3	3	3	P5	mouse
P42227	Stat3	signal transducer and activator of transcription 3	20848	P42227	P5-P20	0.16336	0.749196	0.956906	no	0.16336	0.956906	3	3	3	P5	mouse
P42567	Eps15	epidermal growth factor receptor pathway substrate 15	13858	P42567	P5-P20	0.0265847	0.98023	0.997073	no	0.0265847	0.997073	0	3	3	P5	mouse
A2A7Q9	A2A7Q9			A2A7Q9	FB-P5	#NUM!		0	yes	-6.26613	0.0304013	0	3	2	P5	mouse
Q9QXJ1	Apbb1	amyloid beta (A4) precursor protein-binding, family B, member 1	11785	Q9QXJ1	FB-P20	#NUM!		0	yes	-6.26928	0.0273549	0	2	1	P20	mouse
Q9CXU1	Med31	mediator complex subunit 31	67279	Q9CXU1	FB-P20	#NUM!		0	yes	-6.27907	0.0342079	0	2	2	P20	mouse
P42669	Pura	purine rich element binding protein A	19290	P42669	P5-P20	0.261597	0.338636	0.780086	no	0.261597	0.780086	0	3	3	P5	mouse
O35207	Cdk2ap1	CDK2 (cyclin-dependent kinase 2)-associated protein 1	13445	O35207	FB-P20	#NUM!		0	yes	-6.28424	0.0261073	0	2	1	P20	mouse
P42932	Cct8	chaperonin containing Tcp1, subunit 8 (theta)	12469	P42932	FB-P5	-0.330752	0.331613	0.51001	no	-0.330752	0.51001	3	3	3	P5	mouse
P42932	Cct8	chaperonin containing Tcp1, subunit 8 (theta)	12469	P42932	FB-P20	-0.450001	0.200814	0.349419	no	-0.450001	0.349419	3	3	3	P20	mouse
P42932	Cct8	chaperonin containing Tcp1, subunit 8 (theta)	12469	P42932	P5-P20	-0.119249	0.716515	0.94947	no	-0.119249	0.94947	3	3	3	P20	mouse
P70268	Pkn1	protein kinase N1	320795	P70268	FB-P5	#NUM!		0	yes	-6.29598	0.0424633	0	2	2	P5	mouse
P43241	Cdx2	caudal type homeobox 2	12591	P43241	P5-P20	-3.22189	0.000712278	0.207564	no	-3.22189	0.207564	0	3	3	P20	mouse
Q922X9	Prmt7	protein arginine N-methyltransferase 7	214572	Q922X9	FB-P20	#NUM!		0	yes	-6.30389	0.0433703	0	2	3	P20	mouse
P43247	Msh2	mutS homolog 2	17685	P43247	FB-P20	-0.0670359	0.778843	0.860858	no	-0.0670359	0.860858	3	3	3	P20	mouse
P43247	Msh2	mutS homolog 2	17685	P43247	P5-P20	0.269351	0.282549	0.753402	no	0.269351	0.753402	3	3	3	P5	mouse
P43247	Msh2	mutS homolog 2	17685	P43247	FB-P5	-0.336387	0.190905	0.364355	no	-0.336387	0.364355	3	3	3	P5	mouse
P70460	Vasp	vasodilator-stimulated phosphoprotein	22323	P70460	FB-P20	-3.02803	0.000361005	0.00781386	no	-3.02803	0.00781386	3	3	3	P20	mouse
P43274	H1f4	H1.4 linker histone, cluster member	50709	P43274	P5-P20	0.277482	0.495704	0.8655	no	0.277482	0.8655	3	3	3	P5	mouse
Q6ZPY7	Q6ZPY7			Q6ZPY7	FB-P5	-2.67147	0.00433918	0.0340969	no	-2.67147	0.0340969	3	3	3	P5	mouse
P43275	H1f1	H1.1 linker histone, cluster member	80838	P43275	FB-P5	-1.17859	0.0135012	0.0684821	no	-1.17859	0.0684821	3	3	3	P5	mouse
P43275	H1f1	H1.1 linker histone, cluster member	80838	P43275	P5-P20	0.179912	0.616541	0.920596	no	0.179912	0.920596	3	3	3	P5	mouse
P43275	H1f1	H1.1 linker histone, cluster member	80838	P43275	FB-P20	-0.998677	0.0262841	0.086958	no	-0.998677	0.086958	3	3	3	P20	mouse
P43276	H1f5	H1.5 linker histone, cluster member	56702	P43276	P5-P20	-0.268194	0.573601	0.903346	no	-0.268194	0.903346	3	3	3	P20	mouse
Q99LS3	Psph	phosphoserine phosphatase	100678	Q99LS3	FB-P20	-3.01954	0.00864427	0.0427702	no	-3.01954	0.0427702	2	3	3	P20	mouse
P43276	H1f5	H1.5 linker histone, cluster member	56702	P43276	FB-P5	-1.68581	0.00962409	0.0555306	no	-1.68581	0.0555306	3	3	3	P5	mouse
Q6ZWV3	Rpl10	ribosomal protein L10	110954	Q6ZWV3	FB-P20	-3.01625	0.00401111	0.0265406	no	-3.01625	0.0265406	3	3	3	P20	mouse
Q8VD75	Hip1	huntingtin interacting protein 1	215114	Q8VD75	FB-P5	-2.66972	0.00593911	0.0410609	no	-2.66972	0.0410609	3	3	3	P5	mouse
P43277	H1f3	H1.3 linker histone, cluster member	14957	P43277	P5-P20	0.0779716	0.860006	0.978601	no	0.0779716	0.978601	3	3	3	P5	mouse
Q9JJZ6	Klf13	Kruppel-like factor 13	50794	Q9JJZ6	FB-P20	#NUM!		0	yes	-6.33717	0.0294454	0	2	1	P20	mouse
P43346	Dck	deoxycytidine kinase	13178	P43346	P5-P20	-1.02081	0.0556277	0.52576	no	-1.02081	0.52576	0	3	1	P20	mouse
P43406	Itgav	integrin alpha V	16410	P43406	P5-P20	-1.06434	0.261725	0.740446	no	-1.06434	0.740446	2	3	3	P20	mouse
P43406	Itgav	integrin alpha V	16410	P43406	FB-P20	-3.06105	0.0226136	0.0775399	no	-3.06105	0.0775399	2	3	3	P20	mouse
P43406	Itgav	integrin alpha V	16410	P43406	FB-P5	-1.99672	0.0872727	0.21619	no	-1.99672	0.21619	2	3	3	P5	mouse
P43883	Plin2	perilipin 2	11520	P43883	FB-P20	-0.54465	0.680603	0.783725	no	-0.54465	0.783725	3	2	3	P20	mouse
P43883	Plin2	perilipin 2	11520	P43883	P5-P20	-1.10777	0.415197	0.821858	no	-1.10777	0.821858	3	2	3	P20	mouse
P43883	Plin2	perilipin 2	11520	P43883	FB-P5	0.563116	0.635222	0.765353	no	0.563116	0.765353	3	2	3	FB	mouse
P45376	Akr1b3	aldo-keto reductase family 1, member B3 (aldose reductase)	11677	P45376	P5-P20	-0.0753442	0.302275	0.761742	no	-0.0753442	0.761742	3	3	3	P20	mouse
Q9DBR3	Armc8	armadillo repeat containing 8	74125	Q9DBR3	FB-P5	-2.66586	0.00431755	0.0340969	no	-2.66586	0.0340969	1	3	3	P5	mouse
P97792	Cxadr	coxsackie virus and adenovirus receptor	13052	P97792	FB-P20	-3.01021	0.000632896	0.00955693	no	-3.01021	0.00955693	3	3	3	P20	mouse
P45377	Akr1b8	aldo-keto reductase family 1, member B8	14187	P45377	FB-P5	-0.37275	0.122857	0.26925	no	-0.37275	0.26925	3	3	3	P5	mouse
P45377	Akr1b8	aldo-keto reductase family 1, member B8	14187	P45377	P5-P20	0.132838	0.546081	0.891012	no	0.132838	0.891012	3	3	3	P5	mouse
P45377	Akr1b8	aldo-keto reductase family 1, member B8	14187	P45377	FB-P20	-0.239912	0.291971	0.437807	no	-0.239912	0.437807	3	3	3	P20	mouse
P45481	P45481			P45481	P5-P20	-0.224607	0.835529	0.97646	no	-0.224607	0.97646	0	3	3	P20	mouse
Q921M7	Cyrib	CYFIP related Rac1 interactor B	223601	Q921M7	FB-P20	#NUM!		0	yes	-6.34032	0.0285197	0	2	2	P20	mouse
Q99LJ0	Cttnbp2nl	CTTNBP2 N-terminal like	80281	Q99LJ0	FB-P20	#NUM!		0	yes	-6.35287	0.0181107	0	2	2	P20	mouse
P45591	Cfl2	cofilin 2, muscle	12632	P45591	FB-P5	-0.0653849	0.939616	0.967538	no	-0.0653849	0.967538	3	3	3	P5	mouse
P45591	Cfl2	cofilin 2, muscle	12632	P45591	P5-P20	0.416141	0.633105	0.925985	no	0.416141	0.925985	3	3	3	P5	mouse
P45591	Cfl2	cofilin 2, muscle	12632	P45591	FB-P20	0.350756	0.686557	0.78904	no	0.350756	0.78904	3	3	3	FB	mouse
P45878	Fkbp2	FK506 binding protein 2	14227	P45878	P5-P20	0.102375	0.780377	0.961316	no	0.102375	0.961316	3	3	3	P5	mouse
P45878	Fkbp2	FK506 binding protein 2	14227	P45878	FB-P5	-0.0632598	0.862916	0.920529	no	-0.0632598	0.920529	3	3	3	P5	mouse
P45878	Fkbp2	FK506 binding protein 2	14227	P45878	FB-P20	0.0391151	0.914908	0.953981	no	0.0391151	0.953981	3	3	3	FB	mouse
Q8C156	Ncaph	non-SMC condensin I complex, subunit H	215387	Q8C156	FB-P5	-2.66124	0.000920065	0.0146298	no	-2.66124	0.0146298	2	3	3	P5	mouse
Q9DB15	Mrpl12	mitochondrial ribosomal protein L12	56282	Q9DB15	FB-P20	-3.00483	0.0096122	0.0453125	no	-3.00483	0.0453125	1	3	3	P20	mouse
P45952	Acadm	acyl-Coenzyme A dehydrogenase, medium chain	11364	P45952	P5-P20	0.117739	0.652309	0.929012	no	0.117739	0.929012	3	3	3	P5	mouse
P46061	Rangap1	RAN GTPase activating protein 1	19387	P46061	P5-P20	0.499591	0.127307	0.637444	no	0.499591	0.637444	3	3	3	P5	mouse
P46061	Rangap1	RAN GTPase activating protein 1	19387	P46061	FB-P5	-1.01872	0.0112702	0.0618568	no	-1.01872	0.0618568	3	3	3	P5	mouse
P46061	Rangap1	RAN GTPase activating protein 1	19387	P46061	FB-P20	-0.519127	0.115677	0.237207	no	-0.519127	0.237207	3	3	3	P20	mouse
P46425	Gstp2	glutathione S-transferase, pi 2	14869	P46425	FB-P20	1.44449	0.0485978	0.132757	no	1.44449	0.132757	3	3	1	FB	mouse
P46425	Gstp2	glutathione S-transferase, pi 2	14869	P46425	P5-P20	-1.38601	0.12984	0.638219	no	-1.38601	0.638219	3	3	1	P20	mouse
P46425	Gstp2	glutathione S-transferase, pi 2	14869	P46425	FB-P5	2.83051	0.0177566	0.0819712	no	2.83051	0.0819712	3	3	1	FB	mouse
P46460	Nsf	N-ethylmaleimide sensitive fusion protein	18195	P46460	P5-P20	0.151108	0.569815	0.902195	no	0.151108	0.902195	3	3	3	P5	mouse
P46460	Nsf	N-ethylmaleimide sensitive fusion protein	18195	P46460	FB-P5	0.683509	0.0347055	0.122203	no	0.683509	0.122203	3	3	3	FB	mouse
P46460	Nsf	N-ethylmaleimide sensitive fusion protein	18195	P46460	FB-P20	0.834617	0.016011	0.06266	no	0.834617	0.06266	3	3	3	FB	mouse
P46467	Vps4b	vacuolar protein sorting 4B	20479	P46467	P5-P20	-0.182996	0.895596	0.983177	no	-0.182996	0.983177	2	3	3	P20	mouse
P46467	Vps4b	vacuolar protein sorting 4B	20479	P46467	FB-P5	-1.8802	0.260451	0.440104	no	-1.8802	0.440104	2	3	3	P5	mouse
P46467	Vps4b	vacuolar protein sorting 4B	20479	P46467	FB-P20	-2.0632	0.22266	0.372121	no	-2.0632	0.372121	2	3	3	P20	mouse
P46471	P46471			P46471	FB-P5	-0.804308	0.057084	0.167353	no	-0.804308	0.167353	3	3	3	P5	mouse
P46471	P46471			P46471	P5-P20	-0.0320311	0.928494	0.989186	no	-0.0320311	0.989186	3	3	3	P20	mouse
P46471	P46471			P46471	FB-P20	-0.836339	0.0502496	0.135216	no	-0.836339	0.135216	3	3	3	P20	mouse
P46656	Fdx1	ferredoxin 1	14148	P46656	P5-P20	0.630146	0.497883	0.866452	no	0.630146	0.866452	3	2	2	P5	mouse
P46656	Fdx1	ferredoxin 1	14148	P46656	FB-P5	0.394451	0.636533	0.76565	no	0.394451	0.76565	3	2	2	FB	mouse
P46656	Fdx1	ferredoxin 1	14148	P46656	FB-P20	1.0246	0.255418	0.403962	no	1.0246	0.403962	3	2	2	FB	mouse
P46664	Adss	adenylosuccinate synthetase, non muscle	11566	P46664	FB-P5	0.587823	0.0300432	0.11384	no	0.587823	0.11384	3	3	3	FB	mouse
P46664	Adss	adenylosuccinate synthetase, non muscle	11566	P46664	P5-P20	0.068885	0.751623	0.95743	no	0.068885	0.95743	3	3	3	P5	mouse
P46664	Adss	adenylosuccinate synthetase, non muscle	11566	P46664	FB-P20	0.656708	0.0195845	0.0711675	no	0.656708	0.0711675	3	3	3	FB	mouse
P46735	Myo1b	myosin IB	17912	P46735	P5-P20	0.0248584	0.910185	0.985949	no	0.0248584	0.985949	3	3	3	P5	mouse
[truncated: 9,131 more rows]

## Sheet: embrio-results-log2fc-wide
Protein	Gene	ProteinName	EntrezID	ProteinRef	FB.P20_log2FC	FB.P20_adj.pvalue	FB.P5_log2FC	FB.P5_adj.pvalue	P5.P20_log2FC	P5.P20_adj.pvalue	NumBR_FB	NumBR_P20	NumBR_P5
A2A432	Cul4b	cullin 4B	72584	A2A432	0.617583	0.419837	0.620524	0.452105	-0.0029416	0.999687	3	3	3
A2A4P0	Dhx8	DEAH (Asp-Glu-Ala-His) box polypeptide 8	217207	A2A4P0	-0.898092	0.690725	-0.329224	0.899288	-0.568868	0.9478	3	3	3
A2A5R2	Arfgef2	ADP-ribosylation factor guanine nucleotide-exchange factor 2 (brefeldin A-inhibited)	99371	A2A5R2	#NAME?	0	#NAME?	0	-0.161074	0.958335	0	3	3
A2A6M5	Calcoco2	calcium binding and coiled-coil domain 2	76815	A2A6M5	2.2165	0.0439256	2.34175	0.0453492	-0.125253	0.97646	3	3	3
A2A6Q5	Cdc27	cell division cycle 27	217232	A2A6Q5	-2.1055	0.136243	0.284891	0.823321	-2.39039	0.409399	1	3	2
A2A791	Zmym4	zinc finger, MYM-type 4	67785	A2A791	#NAME?	0	#NAME?	0	0.368265	0.831605	0	2	2
A2A7Q9	A2A7Q9	NA	NA	A2A7Q9	#NAME?	0	#NAME?	0	0.374832	0.958335	0	3	2
A2A7S8	C77080	expressed sequence C77080	97130	A2A7S8	#NAME?	0	#NAME?	0	-1.01743	0.581416	0	3	3
A2A8L5	Ptprf	protein tyrosine phosphatase, receptor type, F	19268	A2A8L5	#NAME?	0	#NAME?	0	-0.907148	0.810691	0	3	2
A2A8U2	Tmem201	transmembrane protein 201	230917	A2A8U2	#NAME?	0	#NAME?	0	1.42884	0.352122	0	2	2
A2A8Z1	Osbpl9	oxysterol binding protein-like 9	100273	A2A8Z1	-0.430805	0.723164	-0.760163	0.545616	0.329359	0.939228	3	3	3
A2ADY9	Ddi2	DNA-damage inducible protein 2	68817	A2ADY9	-1.23819	0.379599	-2.52552	0.122203	1.28732	0.718522	3	3	3
A2AF47	Dock11	dedicator of cytokinesis 11	75974	A2AF47	#NAME?	0	#NAME?	0	-0.201827	NA	0	1	1
A2AGT5	Ckap5	cytoskeleton associated protein 5	75786	A2AGT5	0.904653	0.219663	1.14217	0.157174	-0.237521	0.925985	3	3	3
A2AHC3	Camsap1	calmodulin regulated spectrin-associated protein 1	227634	A2AHC3	#NAME?	0	#NAME?	0	-0.201146	0.831605	0	2	2
A2AI08	Tprn	taperin	97031	A2AI08	-4.39557	0.0505308	-3.50854	0.0988111	-0.887026	0.741683	1	3	3
A2AIV2	Virma	vir like m6A methyltransferase associated	66185	A2AIV2	-1.50953	0.136862	-1.05031	0.299282	-0.459228	0.862194	3	3	3
A2AJT4	A2AJT4	NA	NA	A2AJT4	#NAME?	0	#NAME?	0	-2.85025	0.623204	0	3	1
A2ALK8	Ptpn3	protein tyrosine phosphatase, non-receptor type 3	545622	A2ALK8	#NAME?	0	NA	NA	#NAME?	0	0	3	0
A2ALU4	Shroom2	shroom family member 2	110380	A2ALU4	#NAME?	0	NA	NA	#NAME?	0	0	3	0
A2AMZ4	Ndufaf8	NADH:ubiquinone oxidoreductase complex assembly factor 8	208501	A2AMZ4	#NAME?	0	#NAME?	0	-0.231113	0.982129	0	3	1
A2AN08	Ubr4	ubiquitin protein ligase E3 component n-recognin 4	69116	A2AN08	-1.04126	0.00965375	-1.17425	0.00791336	0.132992	0.836386	3	3	3
A2APB8	Tpx2	TPX2, microtubule-associated	72119	A2APB8	-2.21197	0.055853	-1.74096	0.115794	-0.471008	0.820911	2	3	3
A2APV2	Fmnl2	formin-like 2	71409	A2APV2	#NAME?	0	#NAME?	0	-1.36683	0.401233	0	3	3
A2APY7	Ndufaf5	NADH:ubiquinone oxidoreductase complex assembly factor 5	69487	A2APY7	-0.0274395	0.97567	1.56029	0.0954155	-1.58773	0.363104	2	3	3
A2AQ19	Rtf1	RTF1, Paf1/RNA polymerase II complex component	76246	A2AQ19	0.163707	0.852568	-1.01882	0.248644	1.18253	0.52297	2	3	3
A2AQ25	Etl4	enhancer trap locus 4	208618	A2AQ25	-3.15275	0.00789383	-1.5286	0.0697415	-1.62415	0.348173	3	3	3
A2AR02	Ppig	peptidyl-prolyl isomerase G (cyclophilin G)	228005	A2AR02	-5.32981	0.0231441	-3.979	0.0536086	-1.35081	0.584517	1	3	3
A2ARV4	Lrp2	low density lipoprotein receptor-related protein 2	14725	A2ARV4	-0.26983	0.591526	0.0767647	0.897821	-0.346595	0.780086	3	3	3
A2ASQ1	A2ASQ1	NA	NA	A2ASQ1	#NAME?	0	#NAME?	0	-1.62283	0.629996	0	3	3
A2AT37	Upf2	UPF2 regulator of nonsense transcripts homolog (yeast)	326622	A2AT37	0.435515	0.913283	2.03347	0.595446	-1.59796	0.831605	1	2	2
A2AWL7	Mga	MAX gene associated	29808	A2AWL7	#NAME?	0	#NAME?	0	0.784979	0.847554	0	3	3
A2BDX3	Mocs3	molybdenum cofactor synthesis 3	69372	A2BDX3	-1.73836	0.168743	-0.286053	0.835683	-1.45231	0.629037	3	3	3
A2BE28	Las1l	LAS1-like (S. cerevisiae)	76130	A2BE28	-1.34833	0.217753	-0.581264	0.613538	-0.767064	0.767647	3	3	3
A2BH40	Arid1a	AT rich interactive domain 1A (SWI-like)	93760	A2BH40	-3.15824	0.0162657	-3.21697	0.0205017	0.0587331	0.985751	2	3	3
A2RSJ4	Uhrf1bp1l	UHRF1 (ICBP90) binding protein 1-like	75089	A2RSJ4	-1.40408	0.355239	0.77112	0.636308	-2.1752	0.522267	1	3	2
A2RSY6	Trmt1l	tRNA methyltransferase 1 like	98685	A2RSY6	#NAME?	0	#NAME?	0	0.498642	0.486599	0	3	2
A2RTL5	Rsrc2	arginine/serine-rich coiled-coil 2	208606	A2RTL5	-1.20288	0.398669	-0.701767	0.647558	-0.501116	0.902658	2	3	3
A2TJV2	Palm3	paralemmin 3	74337	A2TJV2	#NAME?	0	#NAME?	0	-0.865774	0.543166	0	3	3
A3KGV1	Odf2	outer dense fiber of sperm tails 2	18286	A3KGV1	-1.54298	0.214505	-1.23482	0.332104	-0.308162	0.932664	2	3	3
A6H5Y3	Mtr	5-methyltetrahydrofolate-homocysteine methyltransferase	238505	A6H5Y3	0.148311	0.924304	Inf	0	#NAME?	0	1	2	0
A6H611	Mipep	mitochondrial intermediate peptidase	70478	A6H611	-1.3806	NA	-1.70815	NA	0.327549	NA	1	1	1
A6H8H2	Dennd4c	DENN/MADD domain containing 4C	329877	A6H8H2	#NAME?	0	#NAME?	0	-1.03126	0.707071	0	3	3
A6PWY4	Wdr76	WD repeat domain 76	241627	A6PWY4	#NAME?	0	#NAME?	0	-0.691253	0.427141	0	2	2
B1AQJ2	Usp36	ubiquitin specific peptidase 36	72344	B1AQJ2	#NAME?	0	#NAME?	0	0.232366	0.97646	0	2	3
B1AR13	Cisd3	CDGSH iron sulfur domain 3	217149	B1AR13	0.0795014	0.972523	Inf	0	#NAME?	0	1	3	0
B1AXP6	Tomm5	translocase of outer mitochondrial membrane 5	68512	B1AXP6	0.719206	0.646103	0.0886714	0.968477	0.630535	0.916932	3	3	2
B1AY13	Usp24	ubiquitin specific peptidase 24	329908	B1AY13	-4.21394	0.0205937	-0.928981	0.394594	-3.28496	0.224074	1	3	3
B1AZI6	Thoc2	THO complex 2	331401	B1AZI6	-2.23979	0.207966	-1.77165	0.323418	-0.468134	0.898093	1	3	3
B1AZP2	Dlgap4	DLG associated protein 4	228836	B1AZP2	-1.23865	0.113753	-0.345771	0.677684	-0.892876	0.640341	3	3	2
B2RPY5	Gpr161	G protein-coupled receptor 161	240888	B2RPY5	-0.314153	0.870841	0.292009	0.872957	-0.606162	0.908603	2	2	3
B2RQC6	Cad	carbamoyl-phosphate synthetase 2, aspartate transcarbamylase, and dihydroorotase	69719	B2RQC6	0.0336939	0.979258	0.296774	0.805073	-0.26308	0.951631	3	3	3
B2RRD7	Brpf1	bromodomain and PHD finger containing, 1	78783	B2RRD7	#NAME?	0	#NAME?	0	-2.76539	0.344171	0	3	2
B2RRE7	Otud4	OTU domain containing 4	73945	B2RRE7	#NAME?	0	#NAME?	0	-1.43526	0.867531	0	2	1
B2RX12	Abcc3	ATP-binding cassette, sub-family C (CFTR/MRP), member 3	76408	B2RX12	#NAME?	0	NA	NA	#NAME?	0	0	3	0
B2RXC1	Trappc11	trafficking protein particle complex 11	320714	B2RXC1	-1.0862	0.408292	-1.38531	0.330381	0.299111	0.9478	2	3	3
B2RXS4	Plxnb2	plexin B2	140570	B2RXS4	-1.41012	0.269586	0.194427	0.895134	-1.60454	0.610566	3	3	3
B2RY56	Rbm25	RNA binding motif protein 25	67039	B2RY56	-1.38117	0.0928381	-1.42632	0.103985	0.0451424	0.989186	3	3	3
B9EJ57	Mterf1b	mitochondrial transcription termination factor 1b	208595	B9EJ57	-0.782217	0.72485	Inf	0	#NAME?	0	1	2	0
B9EJ86	Osbpl8	oxysterol binding protein-like 8	237542	B9EJ86	-2.00195	0.179267	-2.26741	0.157174	0.265466	0.961734	3	3	3
B9EJR8	Dnaaf5	dynein, axonemal assembly factor 5	433956	B9EJR8	0.491423	0.711788	0.134535	0.906368	0.356888	0.932664	2	1	3
C0HKD8	Mfap1a	microfibrillar-associated protein 1A	67532	C0HKD8	-1.38117	0.215158	-2.05197	0.115572	0.670795	0.776139	2	3	3
C0HKE1	H2ac6	H2A clustered histone 6	319164	C0HKE1	2.0379	0.327793	2.53924	0.213037	-0.50134	0.950952	3	2	3
C0HKG5	Rnaset2b	ribonuclease T2B	68195	C0HKG5	1.60201	0.353809	1.0603	0.563847	0.541711	0.929012	3	3	3
D3YXK2	Safb	scaffold attachment factor B	224903	D3YXK2	-0.951436	0.0324883	-1.02083	0.0320569	0.0693979	0.958335	3	3	3
D3YZP9	Ccdc6	coiled-coil domain containing 6	76551	D3YZP9	0.143903	0.886083	0.19062	0.855148	-0.0467172	0.989838	3	3	3
D3Z6Q9	D3Z6Q9	NA	NA	D3Z6Q9	-1.39032	0.158509	-1.31792	0.196533	-0.0724055	0.985949	3	3	3
D3Z7P3	Gls	glutaminase	14660	D3Z7P3	-0.689088	0.591744	-0.658896	0.636726	-0.0301921	0.996	3	3	3
E9PVA8	Gcn1	GCN1 activator of EIF2AK4	231659	E9PVA8	-2.66216	0.0495445	-1.64501	0.181563	-1.01715	0.718522	3	3	3
E9PVX6	Mki67	antigen identified by monoclonal antibody Ki 67	17345	E9PVX6	-3.1062	0.00567589	-2.57986	0.0108388	-0.526337	0.721531	3	3	3
E9PYH6	Setd1a	SET domain containing 1A	233904	E9PYH6	#NAME?	0	#NAME?	0	0.685021	0.892152	0	2	1
E9PYI1	Zfp568	zinc finger protein 568	243905	E9PYI1	#NAME?	0	NA	NA	#NAME?	0	0	3	0
E9PYK3	Parp4	poly (ADP-ribose) polymerase family, member 4	328417	E9PYK3	#NAME?	0	#NAME?	0	-0.751447	0.925985	0	3	2
E9PZJ8	Ascc3	activating signal cointegrator 1 complex subunit 3	77987	E9PZJ8	#NAME?	0	#NAME?	0	0.126306	0.985414	0	3	3
E9Q2Z1	Cecr2	CECR2, histone acetyl-lysine reader	330409	E9Q2Z1	#NAME?	0	#NAME?	0	0.036009	0.995566	0	3	3
E9Q3L2	Pi4ka	phosphatidylinositol 4-kinase alpha	224020	E9Q3L2	#NAME?	0	#NAME?	0	0.911066	0.425243	0	3	2
E9Q3S4	Map3k19	mitogen-activated protein kinase kinase kinase 19	22625	E9Q3S4	-0.196358	0.58354	-1.03758	0.0447285	0.841217	0.343644	2	3	3
E9Q4N7	Arid1b	AT rich interactive domain 1B (SWI-like)	239985	E9Q4N7	#NAME?	0	#NAME?	0	0.0734959	0.989186	0	3	3
E9Q4P1	Wdfy1	WD repeat and FYVE domain containing 1	69368	E9Q4P1	#NAME?	0	#NAME?	0	-2.22106	0.718522	0	2	1
E9Q555	E9Q555	NA	NA	E9Q555	#NAME?	0	#NAME?	0	1.2652	0.734031	0	3	3
E9Q557	Dsp	desmoplakin	109620	E9Q557	-4.18527	0.000489503	-2.85279	0.00133923	-1.33248	0.207564	3	3	3
E9Q5C9	Nolc1	nucleolar and coiled-body phosphoprotein 1	70769	E9Q5C9	-1.21371	0.0587069	-0.952802	0.125594	-0.260913	0.862529	3	3	3
E9Q5F9	Setd2	SET domain containing 2	235626	E9Q5F9	#NAME?	0	#NAME?	0	-0.0827712	0.990855	0	3	3
E9Q5G3	Kif23	kinesin family member 23	71819	E9Q5G3	-0.883332	0.222309	-0.945491	0.217178	0.0621594	0.984192	3	3	3
E9Q5K9	Ythdc1	YTH domain containing 1	231386	E9Q5K9	-2.71417	0.105138	-2.97191	0.100781	0.257735	0.970028	3	3	3
E9Q634	Myo1e	myosin IE	71602	E9Q634	#NAME?	0	NA	NA	#NAME?	0	0	3	0
E9Q6J5	Bod1l	biorientation of chromosomes in cell division 1-like	665775	E9Q6J5	-3.22521	0.00135279	-1.90148	0.00862012	-1.32374	0.227365	3	3	3
E9Q6P5	Ttc7b	tetratricopeptide repeat domain 7B	104718	E9Q6P5	#NAME?	0	#NAME?	0	0.747663	0.81571	0	3	3
E9Q784	Zc3h13	zinc finger CCCH type containing 13	67302	E9Q784	-2.50086	0.0600349	-1.68764	0.181092	-0.813213	0.733998	2	3	2
E9Q7D5	Arhgef5	Rho guanine nucleotide exchange factor (GEF) 5	54324	E9Q7D5	#NAME?	0	#NAME?	0	-0.657384	0.850662	0	2	2
E9Q7E2	Arid2	AT rich interactive domain 2 (ARID, RFX-like)	77044	E9Q7E2	#NAME?	0	#NAME?	0	-0.552052	0.745136	0	2	3
E9Q7G0	Numa1	nuclear mitotic apparatus protein 1	101706	E9Q7G0	-3.29153	0.00135279	-2.11491	0.00666809	-1.17662	0.263929	3	3	3
E9Q8D0	Dnajc21	DnaJ heat shock protein family (Hsp40) member C21	78244	E9Q8D0	-0.642224	0.528767	0.162065	0.893518	-0.804289	0.753402	3	3	3
E9QAG8	Zfp932	zinc finger protein 932	69504	E9QAG8	Inf	0	-1.87097	0.484484	Inf	0	2	0	1
E9QAT4	Sec16a	SEC16 homolog A, endoplasmic reticulum export factor	227648	E9QAT4	-1.51097	0.0435147	-0.456134	0.446979	-1.05483	0.412412	2	3	3
F6ZDS4	Tpr	translocated promoter region, nuclear basket protein	108989	F6ZDS4	-1.63883	0.00273064	-1.15467	0.00956926	-0.484159	0.436368	3	3	3
F8VPU2	Farp1	FERM, RhoGEF (Arhgef) and pleckstrin domain protein 1 (chondrocyte-derived)	223254	F8VPU2	#NAME?	0	#NAME?	0	-0.376774	0.96339	0	3	2
F8VQ03	Adam3	a disintegrin and metallopeptidase domain 3 (cyritestin)	11497	F8VQ03	#NAME?	0	#NAME?	0	-1.24066	0.820098	0	3	2
F8VQB6	Myo10	myosin X	17909	F8VQB6	-1.17311	0.387711	0.410943	0.784139	-1.58405	0.584517	1	3	2
G5E829	Atp2b1	ATPase, Ca++ transporting, plasma membrane 1	67972	G5E829	#NAME?	0	#NAME?	0	-0.710413	0.820911	0	3	1
G5E870	Trip12	thyroid hormone receptor interactor 12	14897	G5E870	-2.72752	0.0117392	-2.44324	0.0207959	-0.284273	0.897952	3	3	3
G5E8B9	Zbtb11	zinc finger and BTB domain containing 11	271377	G5E8B9	#NAME?	0	#NAME?	0	-2.43084	0.412412	0	2	2
L0N7N1	Kif14	kinesin family member 14	381293	L0N7N1	0.0704198	0.975543	-0.513894	0.802229	0.584314	0.875243	1	3	3
O08528	Hk2	hexokinase 2	15277	O08528	-1.51038	0.0238606	-1.62186	0.0244171	0.111475	0.955843	3	3	3
O08529	Capn2	calpain 2	12334	O08529	-2.38189	0.0959983	-2.31095	0.119105	-0.0709472	0.983177	1	3	3
O08539	Bin1	bridging integrator 1	30948	O08539	#NAME?	0	#NAME?	0	-0.768262	0.780086	0	1	2
O08547	Sec22b	SEC22 homolog B, vesicle trafficking protein	20333	O08547	-2.04007	0.179712	-1.8054	0.247092	-0.234671	0.972431	3	3	3
O08573	Lgals9	lectin, galactose binding, soluble 9	16859	O08573	1.60881	0.514005	Inf	0	#NAME?	0	2	1	0
O08579	Emd	emerin	13726	O08579	-2.37507	0.00757016	-1.62451	0.0245003	-0.750563	0.538912	3	3	3
O08582	Gtpbp1	GTP binding protein 1	14904	O08582	-0.671824	0.531642	0.135935	0.916239	-0.80776	0.740268	2	3	3
O08583	Alyref	Aly/REF export factor	21681	O08583	-1.33236	0.00567589	-1.12838	0.0100813	-0.203986	0.740446	3	3	3
O08585	O08585	NA	NA	O08585	-0.909044	0.170869	-0.848988	0.216516	-0.0600556	0.982545	3	3	3
O08605	Mknk1	MAP kinase-interacting serine/threonine kinase 1	17346	O08605	#NAME?	0	#NAME?	0	-0.414478	0.916932	0	2	1
O08638	O08638	NA	NA	O08638	0.807902	0.412793	1.81078	0.119105	-1.00288	0.687467	3	3	3
O08648	Map3k4	mitogen-activated protein kinase kinase kinase 4	26407	O08648	#NAME?	0	#NAME?	0	0.456094	0.904684	0	3	2
O08663	Metap2	methionine aminopeptidase 2	56307	O08663	-0.600837	0.353791	-0.79354	0.249151	0.192703	0.930686	3	3	3
O08688	Capn5	calpain 5	12337	O08688	-1.88886	0.297799	-1.64762	0.388056	-0.241245	0.958335	1	3	3
O08691	Arg2	arginase type II	11847	O08691	2.09613	0.195577	2.52951	0.152295	-0.433378	0.939228	3	3	3
O08709	Prdx6	peroxiredoxin 6	11758	O08709	0.536169	0.482228	0.450983	0.591738	0.0851857	0.981316	3	3	3
O08715	Akap1	A kinase (PRKA) anchor protein 1	11640	O08715	-1.75854	0.00789383	-0.62534	0.147196	-1.1332	0.238159	3	3	3
O08738	Casp6	caspase 6	12368	O08738	#NAME?	0	#NAME?	0	0.0644117	0.932525	0	1	2
O08749	Dld	dihydrolipoamide dehydrogenase	13382	O08749	-0.0167024	0.974769	0.0299213	0.952981	-0.0466237	0.978601	3	3	3
O08756	O08756	NA	NA	O08756	1.36465	0.108255	1.82546	0.0621465	-0.460806	0.81747	3	3	3
O08759	Ube3a	ubiquitin protein ligase E3A	22215	O08759	#NAME?	0	#NAME?	0	-1.62282	0.767647	0	1	3
O08784	Tcof1	treacle ribosome biogenesis factor 1	21453	O08784	-1.38253	0.0317259	-1.45071	0.0336193	0.0681818	0.97646	3	3	3
O08788	Dctn1	dynactin 1	13191	O08788	-1.09203	0.255857	-0.990218	0.323179	-0.101815	0.978601	2	3	3
O08795	Prkcsh	protein kinase C substrate 80K-H	19089	O08795	-2.73381	0.00597366	-2.71257	0.00646827	-0.0212405	0.990855	3	3	3
O08796	Eef2k	eukaryotic elongation factor-2 kinase	13631	O08796	1.60407	0.393542	1.70818	0.410312	-0.104107	0.986083	2	1	1
O08807	Prdx4	peroxiredoxin 4	53381	O08807	-1.67012	0.359462	-0.15224	0.944302	-1.51788	0.638219	1	3	3
O08808	Diaph1	diaphanous related formin 1	13367	O08808	0.868713	0.105478	0.901719	0.114581	-0.033006	0.989186	3	3	3
O08810	Eftud2	elongation factor Tu GTP binding domain containing 2	20624	O08810	-0.400289	0.161649	-0.336877	0.246823	-0.0634123	0.954604	3	3	3
O08856	Ell	elongation factor RNA polymerase II	13716	O08856	-1.56849	0.379579	-1.67475	0.382699	0.106265	0.989186	2	3	3
O08912	Galnt1	polypeptide N-acetylgalactosaminyltransferase 1	14423	O08912	#NAME?	0	#NAME?	0	-0.919446	0.734031	0	2	3
O08914	Faah	fatty acid amide hydrolase	14073	O08914	Inf	0	Inf	0	NA	NA	2	0	0
O08915	Aip	aryl-hydrocarbon receptor-interacting protein	11632	O08915	1.30936	0.161593	2.31348	0.0665603	-1.00411	0.538912	1	2	3
O08917	Flot1	flotillin 1	14251	O08917	-0.898746	0.748135	-0.662029	0.864553	-0.236717	0.983177	1	3	1
O08970	Tuft1	tuftelin 1	22156	O08970	-2.21481	0.217396	-1.55029	0.393841	-0.664518	0.826213	1	3	3
O08989	Mras	muscle and microspikes RAS	17532	O08989	-0.835855	0.542971	0.28051	0.847698	-1.11636	0.724864	2	2	3
O08997	Atox1	antioxidant 1 copper chaperone	11927	O08997	0.78534	0.304563	-0.677704	0.402824	1.46304	0.427141	3	3	3
O09000	O09000	NA	NA	O09000	-2.27542	0.0718538	-1.87467	0.126781	-0.400754	0.819802	1	3	3
O09035	Dbil5	diazepam binding inhibitor-like 5	13168	O09035	#NAME?	0	#NAME?	0	-0.188424	0.965113	0	2	3
O09043	Napsa	napsin A aspartic peptidase	16541	O09043	Inf	0	Inf	0	NA	NA	3	0	0
O09044	Snap23	synaptosomal-associated protein 23	20619	O09044	-1.31143	0.22065	-0.769222	0.480597	-0.542211	0.81895	2	3	3
O09061	Psmb1	proteasome (prosome, macropain) subunit, beta type 1	19170	O09061	0.652272	0.52322	0.798044	0.467972	-0.145773	0.97646	3	3	3
O09106	Hdac1	histone deacetylase 1	433759	O09106	-1.5867	0.185335	-0.694918	0.57291	-0.891786	0.753402	3	3	3
O09110	Map2k3	mitogen-activated protein kinase kinase 3	26397	O09110	1.08626	0.327509	2.12964	0.213622	-1.04338	0.740268	2	2	1
O09111	Ndufb11	NADH:ubiquinone oxidoreductase subunit B11	104130	O09111	-0.129994	0.860776	-0.267396	0.713579	0.137402	0.958335	3	3	3
O09117	Sypl	synaptophysin-like protein	19027	O09117	-0.151799	0.856078	-1.04715	0.207037	0.895348	0.635694	3	3	3
O09130	Nfatc2ip	nuclear factor of activated T cells, cytoplasmic, calcineurin dependent 2 interacting protein	18020	O09130	-3.28576	0.0513292	-1.72909	0.246672	-1.55667	0.646284	3	3	3
O09131	Gsto1	glutathione S-transferase omega 1	14873	O09131	-0.485647	0.387104	-0.60581	0.312041	0.120164	0.958335	3	3	3
O09167	O09167	NA	NA	O09167	-3.23122	0.0116749	-3.05875	0.018438	-0.172473	0.958335	3	3	3
O09172	Gclm	glutamate-cysteine ligase, modifier subunit	14630	O09172	1.19061	0.537958	-0.245082	0.916239	1.43569	0.765633	3	3	3
O35114	Scarb2	scavenger receptor class B, member 2	12492	O35114	-0.496575	0.510598	-2.09622	0.0654345	1.59964	0.329637	1	3	3
O35126	Atn1	atrophin 1	13498	O35126	-2.07731	0.123907	-0.510973	0.673863	-1.56634	0.486009	1	3	3
O35129	Phb2	prohibitin 2	12034	O35129	0.561163	0.123072	0.509011	0.17255	0.0521516	0.974268	3	3	3
O35130	Emg1	EMG1 N1-specific pseudouridine methyltransferase	14791	O35130	-0.913486	0.711629	-1.7578	0.537825	0.844314	0.919549	2	3	2
O35134	Polr1a	polymerase (RNA) I polypeptide A	20019	O35134	-1.15705	0.0142282	-0.633216	0.0942616	-0.523835	0.505887	3	3	3
O35143	Atpif1	ATPase inhibitory factor 1	11983	O35143	-0.100502	0.943241	0.343304	0.784139	-0.443805	0.902746	3	3	3
O35144	Terf2	telomeric repeat binding factor 2	21750	O35144	#NAME?	0	#NAME?	0	-0.491509	0.810691	0	3	3
O35166	Gosr2	golgi SNAP receptor complex member 2	56494	O35166	-0.0450311	0.957225	1.70398	0.288141	-1.74901	0.663131	2	1	1
O35207	Cdk2ap1	CDK2 (cyclin-dependent kinase 2)-associated protein 1	13445	O35207	#NAME?	0	#NAME?	0	-0.354267	0.97646	0	2	1
O35216	Cenpa	centromere protein A	12615	O35216	0.0221387	0.989589	-0.236083	0.893093	0.258222	0.951631	1	3	3
O35218	Cpsf2	cleavage and polyadenylation specific factor 2	51786	O35218	-1.68307	0.0990341	-0.495342	0.599091	-1.18773	0.552589	2	3	3
O35226	Psmd4	proteasome (prosome, macropain) 26S subunit, non-ATPase, 4	19185	O35226	-1.26558	0.0622093	-0.85085	0.18225	-0.414731	0.767647	3	3	3
O35280	Chek1	checkpoint kinase 1	12649	O35280	-0.408593	0.847996	-0.718765	0.73766	0.310172	0.965113	2	3	3
O35286	Dhx15	DEAH (Asp-Glu-Ala-His) box polypeptide 15	13204	O35286	-0.36069	0.627497	-0.39092	0.629092	0.0302297	0.990855	3	3	3
O35295	Purb	purine rich element binding protein B	19291	O35295	-1.04664	0.756972	-0.668308	0.862777	-0.378335	0.971939	1	3	3
O35326	Srsf5	serine and arginine-rich splicing factor 5	20384	O35326	-2.19486	0.0403675	-2.18427	0.0495247	-0.010589	0.997653	3	3	3
O35343	Kpna4	karyopherin (importin) alpha 4	16649	O35343	-0.589825	0.617035	-0.851222	0.497878	0.261397	0.956906	3	3	3
O35344	Kpna3	karyopherin (importin) alpha 3	16648	O35344	-1.45521	0.0759105	-1.3325	0.11499	-0.122711	0.970028	3	3	3
O35345	Kpna6	karyopherin (importin) alpha 6	16650	O35345	-1.82229	0.201004	-1.69081	0.250679	-0.131483	0.982545	3	3	3
O35350	Capn1	calpain 1	12333	O35350	-1.84003	0.202184	-0.420791	0.785203	-1.41924	0.687467	3	3	3
O35381	Anp32a	acidic (leucine-rich) nuclear phosphoprotein 32 family, member A	11737	O35381	-2.40008	0.162959	-0.588671	0.719317	-1.81141	0.527033	1	3	3
O35382	Exoc4	exocyst complex component 4	20336	O35382	-1.16841	0.168294	-0.923189	0.282984	-0.245218	0.873621	1	3	2
O35405	Pld3	phospholipase D family, member 3	18807	O35405	-0.910575	0.212705	-1.29202	0.118383	0.381441	0.838083	3	3	3
O35435	Dhodh	dihydroorotate dehydrogenase	56749	O35435	0.60981	0.525174	2.11915	0.11384	-1.50934	0.584517	3	3	2
O35445	Rnf5	ring finger protein 5	54197	O35445	#NAME?	0	#NAME?	0	-0.109749	0.923105	0	2	2
O35459	Ech1	enoyl coenzyme A hydratase 1, peroxisomal	51798	O35459	#NAME?	0	#NAME?	0	-0.780488	0.589915	0	3	3
O35465	Fkbp8	FK506 binding protein 8	14232	O35465	-0.912334	0.158469	-0.388097	0.549253	-0.524236	0.724864	3	3	3
O35473	C1d	C1D nuclear receptor co-repressor	57316	O35473	0.543641	NA	1.29172	NA	-0.748075	NA	1	1	1
O35490	Bhmt	betaine-homocysteine methyltransferase	12116	O35490	0.569378	0.0728899	0.111665	0.711233	0.457713	0.510495	3	3	3
O35495	Cdk14	cyclin-dependent kinase 14	18647	O35495	#NAME?	0	#NAME?	0	-2.87727	0.566667	0	2	2
O35551	Rabep1	rabaptin, RAB GTPase binding effector protein 1	54189	O35551	-0.594804	0.595317	Inf	0	#NAME?	0	1	3	0
O35566	Cd151	CD151 antigen	12476	O35566	#NAME?	0	#NAME?	0	-0.971068	0.718013	0	3	3
O35593	Psmd14	proteasome (prosome, macropain) 26S subunit, non-ATPase, 14	59029	O35593	-0.439148	0.352969	-0.41	0.41248	-0.0291486	0.989186	3	3	3
O35598	Adam10	a disintegrin and metallopeptidase domain 10	11487	O35598	-2.87125	0.076271	-2.01078	0.188858	-0.860473	0.776139	2	3	3
O35604	Npc1	NPC intracellular cholesterol transporter 1	18145	O35604	-1.05093	0.226494	-0.821418	0.410925	-0.229508	0.949998	3	3	2
O35609	Scamp3	secretory carrier membrane protein 3	24045	O35609	#NAME?	0	#NAME?	0	-0.605084	0.943191	0	2	2
O35618	Mdm4	transformed mouse 3T3 cell double minute 4	17248	O35618	#NAME?	0	#NAME?	0	0.196662	0.901842	0	2	1
O35621	Pmm1	phosphomannomutase 1	29858	O35621	0.570159	0.439867	-0.00870711	0.992129	0.578866	0.755798	3	3	3
O35638	Stag2	stromal antigen 2	20843	O35638	1.04917	0.360201	0.570106	0.634357	0.479068	0.902195	3	2	2
O35639	Anxa3	annexin A3	11745	O35639	#NAME?	0	#NAME?	0	-0.766192	0.780086	0	3	3
O35643	Ap1b1	adaptor protein complex AP-1, beta 1 subunit	11764	O35643	-0.585576	0.438202	-0.351583	0.674252	-0.233993	0.929301	3	3	3
O35646	Capn6	calpain 6	12338	O35646	0.439449	NA	0.175954	NA	0.263495	NA	1	1	1
O35648	Cetn3	centrin 3	12626	O35648	1.59832	0.380878	2.40555	0.366417	-0.807231	0.913576	2	3	1
O35654	Pold2	polymerase (DNA directed), delta 2, regulatory subunit	18972	O35654	-0.630657	0.600858	-1.86308	0.181439	1.23242	0.651126	2	3	3
O35658	O35658	NA	NA	O35658	1.85285	0.150433	0.966628	0.453943	0.886221	0.765524	3	3	3
O35683	Ndufa1	NADH:ubiquinone oxidoreductase subunit A1	54405	O35683	#NAME?	0	#NAME?	0	-1.63315	0.873695	0	1	2
O35685	Nudc	nudC nuclear distribution protein	18221	O35685	0.282521	0.572068	0.0859298	0.883128	0.196592	0.904865	3	3	3
O35691	Pnn	pinin	18949	O35691	-2.16632	0.027616	-1.36597	0.11499	-0.800352	0.661654	3	3	3
O35704	Sptlc1	serine palmitoyltransferase, long chain base subunit 1	268656	O35704	-2.97522	0.165607	-2.47019	0.28667	-0.505037	0.942504	2	3	2
O35711	Ppfibp2	PTPRF interacting protein, binding protein 2 (liprin beta 2)	19024	O35711	0.415486	0.672312	0.637239	0.53795	-0.221753	0.955843	3	3	3
O35737	Hnrnph1	heterogeneous nuclear ribonucleoprotein H1	59013	O35737	-0.60395	0.353285	-0.375551	0.590999	-0.228399	0.918912	3	3	3
O35841	Api5	apoptosis inhibitor 5	11800	O35841	-0.735525	0.0909813	-0.666955	0.133605	-0.0685701	0.965113	3	3	3
O35855	Bcat2	branched chain aminotransferase 2, mitochondrial	12036	O35855	#NAME?	0	#NAME?	0	0.305899	0.958335	0	1	3
O35857	Timm44	translocase of inner mitochondrial membrane 44	21856	O35857	-0.419662	0.429676	-0.586775	0.30902	0.167114	0.929012	3	3	3
O35864	Cops5	COP9 signalosome subunit 5	26754	O35864	0.857886	0.141183	0.393154	0.495256	0.464732	0.724864	3	3	3
O35887	Calu	calumenin	12321	O35887	-4.15339	0.0620958	-3.79861	0.0949939	-0.354778	0.961507	3	3	3
O35900	Lsm2	LSM2 homolog, U6 small nuclear RNA and mRNA degradation associated	27756	O35900	-1.11642	0.578229	-0.71841	0.726149	-0.398012	0.94237	1	2	3
O35904	Pik3cd	phosphatidylinositol-4,5-bisphosphate 3-kinase catalytic subunit delta	18707	O35904	2.08768	0.0600978	Inf	0	#NAME?	0	3	2	0
O35930	Gp1ba	glycoprotein 1b, alpha polypeptide	14723	O35930	2.58261	0.0860446	2.11997	0.157174	0.46264	0.920721	3	3	3
O35972	Mrpl23	mitochondrial ribosomal protein L23	19935	O35972	0.806737	NA	-0.101612	NA	0.908349	NA	1	1	1
O35988	Sdc4	syndecan 4	20971	O35988	-2.81904	0.0368112	-0.61688	0.59021	-2.20216	0.409399	3	3	3
O54692	Zw10	zw10 kinetochore protein	26951	O54692	#NAME?	0	#NAME?	0	-0.600689	0.778902	0	3	2
O54734	Ddost	dolichyl-di-phosphooligosaccharide-protein glycotransferase	13200	O54734	-0.939425	0.156107	-0.355256	0.597269	-0.584169	0.707521	3	3	3
O54774	Ap3d1	adaptor-related protein complex 3, delta 1 subunit	11776	O54774	-1.91739	0.242769	-1.48907	0.376806	-0.428321	0.901842	1	3	3
O54784	Dapk3	death-associated protein kinase 3	13144	O54784	-0.494052	NA	1.30886	NA	-1.80291	NA	1	1	1
O54804	Chka	choline kinase alpha	12660	O54804	1.34342	0.45127	Inf	0	#NAME?	0	3	2	0
O54824	Il16	interleukin 16	16170	O54824	0.712272	0.783725	-1.71848	0.546762	2.43075	0.688053	1	2	2
O54825	Bysl	bystin-like	53414	O54825	0.0942498	0.907842	-0.774678	0.292396	0.868928	0.610566	3	3	3
O54826	Mllt10	myeloid/lymphoid or mixed-lineage leukemia; translocated to, 10	17354	O54826	#NAME?	0	#NAME?	0	-0.887566	0.721531	0	2	3
O54833	Csnk2a2	casein kinase 2, alpha prime polypeptide	13000	O54833	-0.924567	0.495419	-0.595595	0.68804	-0.328972	0.923001	1	3	3
O54864	Suv39h1	suppressor of variegation 3-9 1	20937	O54864	#NAME?	0	#NAME?	0	1.06982	0.80861	0	1	3
O54879	Hmgb3	high mobility group box 3	15354	O54879	-1.69332	0.0921663	-1.4221	0.155068	-0.271217	0.91853	2	3	3
O54891	Lgals6	lectin, galactose binding, soluble 6	16857	O54891	#NAME?	0	#NAME?	0	0.941555	0.634892	0	3	3
O54916	Reps1	RalBP1 associated Eps domain containing protein	19707	O54916	#NAME?	0	#NAME?	0	-1.05173	0.541608	0	3	3
O54927	Wsb1	WD repeat and SOCS box-containing 1	78889	O54927	0.287515	0.85721	0.47508	0.690797	-0.187566	0.97646	2	1	3
O54941	Smarce1	SWI/SNF related, matrix associated, actin dependent regulator of chromatin, subfamily e, member 1	57376	O54941	-1.12059	0.249226	-1.63212	0.135619	0.511533	0.839336	3	3	3
O54946	Dnajb6	DnaJ heat shock protein family (Hsp40) member B6	23950	O54946	-0.704971	0.739369	-0.83088	0.711379	0.125909	0.989186	3	3	3
O54962	Banf1	BAF nuclear assembly factor 1	23825	O54962	1.01769	0.429676	0.492724	0.731665	0.524966	0.901842	3	3	3
O54983	Crym	crystallin, mu	12971	O54983	2.33796	0.00567589	2.70121	0.00425462	-0.363249	0.740311	3	3	3
O54984	Get3	guided entry of tail-anchored proteins factor 3, ATPase	56495	O54984	-0.371227	0.424268	0.202087	0.693418	-0.573314	0.626382	3	3	3
O54988	Slk	STE20-like kinase	20874	O54988	-2.78472	0.0116749	-1.22937	0.0847507	-1.55536	0.227365	1	3	3
O55003	Bnip3	BCL2/adenovirus E1B interacting protein 3	12176	O55003	#NAME?	0	#NAME?	0	-1.05042	0.610566	0	2	2
O55013	Trappc3	trafficking protein particle complex 3	27096	O55013	-0.136584	0.896006	-0.0156474	0.989092	-0.120936	0.97646	3	3	3
O55022	Pgrmc1	progesterone receptor membrane component 1	53328	O55022	-2.39937	0.0171419	-1.31689	0.109259	-1.08248	0.52576	3	3	3
O55029	Copb2	coatomer protein complex, subunit beta 2 (beta prime)	50797	O55029	-0.162769	0.867415	-0.963242	0.301352	0.800473	0.718013	3	3	3
O55033	Nck2	non-catalytic region of tyrosine kinase adaptor protein 2	17974	O55033	-1.92867	0.280272	-0.812491	0.655806	-1.11618	0.71878	1	3	3
O55047	Tlk2	tousled-like kinase 2 (Arabidopsis)	24086	O55047	#NAME?	0	#NAME?	0	-0.78835	0.740311	0	2	2
O55060	Tpmt	thiopurine methyltransferase	22017	O55060	1.5433	0.261717	1.6973	0.246105	-0.153994	0.977657	2	3	3
O55091	Impact	impact, RWD domain protein	16210	O55091	0.778832	0.687733	0.0419678	0.98172	0.736864	0.906258	2	1	2
O55100	Syngr1	synaptogyrin 1	20972	O55100	#NAME?	0	#NAME?	0	-4.00019	0.666595	0	1	2
O55106	Strn	striatin, calmodulin binding protein	268980	O55106	-1.19153	0.196513	0.58787	0.534717	-1.7794	0.412412	3	3	3
O55111	Dsg2	desmoglein 2	13511	O55111	-4.23759	0.0020137	-3.27869	0.00586111	-0.958899	0.52377	3	3	3
O55125	Nipsnap1	nipsnap homolog 1	18082	O55125	3.25253	0.0205657	1.91122	0.10697	1.34131	0.584517	3	3	3
O55126	O55126	NA	NA	O55126	1.19115	0.0231441	0.543443	0.193594	0.647712	0.501534	3	3	3
O55128	Sap18	Sin3-associated polypeptide 18	20220	O55128	0.0702602	0.974769	-0.817641	0.644643	0.887901	0.837154	3	3	3
O55131	Septin7	septin 7	235072	O55131	-2.87585	0.0366889	-2.19221	0.0923241	-0.683649	0.807175	3	3	3
O55135	Eif6	eukaryotic translation initiation factor 6	16418	O55135	-0.210321	0.719585	0.19103	0.762085	-0.401351	0.776139	3	3	3
O55142	Rpl35a	ribosomal protein L35A	57808	O55142	-1.67093	0.00165396	-1.1538	0.00646827	-0.51713	0.354681	3	3	3
O55143	Atp2a2	ATPase, Ca++ transporting, cardiac muscle, slow twitch 2	11938	O55143	-1.81321	0.021604	-1.00069	0.126316	-0.812513	0.56593	3	3	3
O55201	Supt5	suppressor of Ty 5, DSIF elongation factor subunit	20924	O55201	-0.386106	0.395039	-0.374783	0.439168	-0.0113227	0.995566	3	3	3
O55222	Ilk	integrin linked kinase	16202	O55222	-0.205063	0.923093	-0.22447	0.91544	0.0194074	0.998407	3	3	3
O55234	Psmb5	proteasome (prosome, macropain) subunit, beta type 5	19173	O55234	0.75647	0.535361	0.904468	0.491476	-0.147998	0.978601	3	3	3
O70133	Dhx9	DEAH (Asp-Glu-Ala-His) box polypeptide 9	13211	O70133	-0.874581	0.0920641	-0.792958	0.135102	-0.0816236	0.965113	3	3	3
O70152	Dpm1	dolichol-phosphate (beta-D) mannosyltransferase 1	13480	O70152	-1.42562	0.0710979	-1.96468	0.0394397	0.539061	0.718013	2	3	3
O70194	Eif3d	eukaryotic translation initiation factor 3, subunit D	55944	O70194	-0.942324	0.06266	-0.651329	0.174956	-0.290995	0.780086	3	3	3
O70251	Eef1b2	eukaryotic translation elongation factor 1 beta 2	55949	O70251	-0.313252	0.352372	-0.586236	0.127995	0.272984	0.740311	3	3	3
O70252	Hmox2	heme oxygenase 2	15369	O70252	-0.999751	0.418112	-0.823016	0.659152	-0.176734	0.982129	3	3	1
O70305	Atxn2	ataxin 2	20239	O70305	-3.87155	0.01225	-3.48751	0.0214414	-0.384033	0.908317	3	3	3
O70309	Itgb5	integrin beta 5	16419	O70309	-1.06125	0.362318	-0.92265	0.453669	-0.1386	0.97646	2	3	3
O70310	Nmt1	N-myristoyltransferase 1	18107	O70310	-1.22583	0.247471	-1.84346	0.125072	0.617634	0.81895	3	3	3
O70318	Epb41l2	erythrocyte membrane protein band 4.1 like 2	13822	O70318	-1.88238	0.0135087	-1.5421	0.029702	-0.340277	0.780086	3	3	3
O70325	Gpx4	glutathione peroxidase 4	625249	O70325	0.295026	0.840521	0.742361	0.613135	-0.447334	0.925985	3	3	3
O70333	Cript	cysteine-rich PDZ-binding protein	56724	O70333	1.31553	0.24482	Inf	0	#NAME?	0	2	2	0
O70378	Emc8	ER membrane protein complex subunit 8	18117	O70378	-0.880742	0.399613	-0.577643	0.608359	-0.303098	0.927625	2	3	3
O70400	Pdlim1	PDZ and LIM domain 1 (elfin)	54132	O70400	-1.36778	0.0809179	-1.02871	0.181092	-0.339067	0.860532	3	3	3
O70401	O70401	NA	NA	O70401	-1.76347	0.530915	-1.20961	0.70901	-0.553863	0.948725	1	3	2
O70404	Vamp8	vesicle-associated membrane protein 8	22320	O70404	-2.15859	0.0171384	-1.45404	0.0644652	-0.704552	0.645025	3	3	3
O70405	Ulk1	unc-51 like kinase 1	22241	O70405	#NAME?	0	#NAME?	0	-0.272738	0.9781	0	2	1
O70422	Gtf2h4	general transcription factor II H, polypeptide 4	14885	O70422	1.14533	0.132757	0.61991	0.465424	0.525425	0.776139	2	3	1
O70433	Fhl2	four and a half LIM domains 2	14200	O70433	#NAME?	0	#NAME?	0	-1.60089	0.49306	0	3	2
O70435	Psma3	proteasome subunit alpha 3	19167	O70435	-0.467232	0.369937	-1.38425	0.0442397	0.917019	0.486599	3	3	3
O70439	O70439	NA	NA	O70439	0.126816	0.957261	1.06422	0.606154	-0.937404	0.833783	2	3	3
O70456	Sfn	stratifin	55948	O70456	-0.67233	0.306558	-0.549243	0.428096	-0.123087	0.961316	3	3	3
O70475	Ugdh	UDP-glucose dehydrogenase	22235	O70475	-1.08534	0.212143	-1.34457	0.157111	0.259236	0.929012	3	3	3
O70492	O70492	NA	NA	O70492	-0.438273	0.726523	-0.90025	0.487297	0.461977	0.910715	3	3	3
O70493	Snx12	sorting nexin 12	55988	O70493	0.0832482	0.954959	-0.294084	0.825288	0.377333	0.929012	3	3	3
O70494	Sp3	trans-acting transcription factor 3	20687	O70494	0.45531	0.40282	0.23862	0.689469	0.216691	0.902322	3	3	3
O70503	Hsd17b12	hydroxysteroid (17-beta) dehydrogenase 12	56348	O70503	-1.51977	0.279453	-2.63731	0.115751	1.11754	0.718904	2	3	3
O70546	Kdm6a	lysine (K)-specific demethylase 6A	22289	O70546	-1.20375	0.38326	-0.512856	0.702026	-0.690894	0.780086	1	2	3
O70551	Srpk1	serine/arginine-rich protein specific kinase 1	20815	O70551	-1.08736	0.118835	-1.07476	0.141024	-0.0126028	0.997073	3	3	3
O70591	Pfdn2	prefoldin 2	18637	O70591	-1.38582	0.249587	-1.71439	0.187964	0.328569	0.939228	3	3	3
O88271	Cfdp1	craniofacial development protein 1	23837	O88271	-1.4354	0.0447661	-0.946359	0.149037	-0.489045	0.728988	3	3	3
O88273	Grem2	gremlin 2, DAN family BMP antagonist	23893	O88273	#NAME?	0	#NAME?	0	0.0358728	0.982945	0	1	2
O88286	Wiz	widely-interspaced zinc finger motifs	22404	O88286	-1.22209	0.395914	-0.335431	0.834641	-0.886662	0.722675	1	3	3
O88291	Zfp326	zinc finger protein 326	54367	O88291	#NAME?	0	#NAME?	0	-1.60564	0.520081	0	3	3
O88322	Nid2	nidogen 2	18074	O88322	#NAME?	0	#NAME?	0	-0.883414	0.902658	0	3	2
O88342	Wdr1	WD repeat domain 1	22388	O88342	-0.931268	0.0255796	-1.15719	0.018438	0.225925	0.765524	3	3	3
O88379	O88379	NA	NA	O88379	-3.03467	0.019485	-1.58114	0.11564	-1.45353	0.450126	2	3	2
O88413	Tulp3	tubby-like protein 3	22158	O88413	#NAME?	0	#NAME?	0	-1.19161	0.538912	0	3	3
O88441	Mtx2	metaxin 2	53375	O88441	0.673149	0.77778	2.23311	0.314673	-1.55996	0.780086	3	2	3
O88448	O88448	NA	NA	O88448	#NAME?	0	#NAME?	0	-0.826454	0.527626	0	3	3
O88455	Dhcr7	7-dehydrocholesterol reductase	13360	O88455	-1.05745	0.146457	-0.426602	0.558983	-0.630843	0.717576	3	3	3
O88456	Capns1	calpain, small subunit 1	12336	O88456	-0.830055	0.410437	-0.3686	0.740966	-0.461456	0.873621	3	3	3
O88477	Igf2bp1	insulin-like growth factor 2 mRNA binding protein 1	140486	O88477	-1.68897	0.00465945	-1.57259	0.00631026	-0.116388	0.907973	3	3	3
O88487	Dync1i2	dynein cytoplasmic 1 intermediate chain 2	13427	O88487	-0.411545	0.680977	0.176621	0.8774	-0.588166	0.81895	3	3	3
O88491	O88491	NA	NA	O88491	-2.42997	0.0300697	-1.95199	0.0583078	-0.477977	0.690167	1	3	3
O88508	Dnmt3a	DNA methyltransferase 3A	13435	O88508	#NAME?	0	#NAME?	0	-0.351608	0.951631	0	2	3
O88509	Dnmt3b	DNA methyltransferase 3B	13436	O88509	-2.77792	0.203612	-0.80146	0.670903	-1.97646	0.610566	1	2	3
O88531	Ppt1	palmitoyl-protein thioesterase 1	19063	O88531	Inf	0	0.920092	0.653014	Inf	0	2	0	1
O88532	Zfr	zinc finger RNA binding protein	22763	O88532	-3.07234	0.000667799	-2.93593	0.000983814	-0.136407	0.866945	3	3	3
O88543	Cops3	COP9 signalosome subunit 3	26572	O88543	0.809482	0.395037	1.10365	0.280319	-0.294171	0.929012	3	3	3
O88544	Cops4	COP9 signalosome subunit 4	26891	O88544	1.00963	0.393357	0.742469	0.556634	0.267162	0.956906	3	3	3
O88545	Cops6	COP9 signalosome subunit 6	26893	O88545	1.65672	0.173477	1.01255	0.354505	0.644166	0.825147	3	2	3
O88559	Men1	multiple endocrine neoplasia 1	17283	O88559	#NAME?	0	#NAME?	0	-0.342933	0.974739	0	3	1
O88569	Hnrnpa2b1	heterogeneous nuclear ribonucleoprotein A2/B1	53379	O88569	-0.280365	0.515226	-0.727849	0.145431	0.447484	0.684914	3	3	3
O88597	Becn1	beclin 1, autophagy related	56208	O88597	#NAME?	0	#NAME?	0	-0.631091	0.505887	0	3	2
O88622	O88622	NA	NA	O88622	-3.32326	0.123907	-2.21195	0.272441	-1.1113	0.724864	1	3	3
O88630	Gosr1	golgi SNAP receptor complex member 1	53334	O88630	#NAME?	0	#NAME?	0	-1.71164	0.821858	0	2	2
O88653	Lamtor3	late endosomal/lysosomal adaptor, MAPK and MTOR activator 3	56692	O88653	Inf	0	2.48835	0.343067	Inf	0	3	0	1
O88665	Brd7	bromodomain containing 7	26992	O88665	#NAME?	0	#NAME?	0	0.0115473	0.998423	0	2	3
O88685	Psmc3	proteasome (prosome, macropain) 26S subunit, ATPase 3	19182	O88685	-0.741758	0.0325305	-0.714218	0.0433264	-0.0275396	0.982129	3	3	3
O88696	Clpp	caseinolytic mitochondrial matrix peptidase proteolytic subunit	53895	O88696	-1.98614	0.137355	-1.2546	0.345674	-0.731545	0.820098	3	3	3
O88700	Blm	Bloom syndrome, RecQ like helicase	12144	O88700	#NAME?	0	#NAME?	0	-0.407984	0.855401	0	2	1
O88708	Orc4	origin recognition complex, subunit 4	26428	O88708	0.187777	0.895053	-0.0906225	0.954074	0.2784	0.929012	1	3	3
O88712	Ctbp1	C-terminal binding protein 1	13016	O88712	#NAME?	0	#NAME?	0	0.117379	0.990855	0	3	1
O88735	Map7	microtubule-associated protein 7	17761	O88735	-1.91211	0.105478	-1.84719	0.132271	-0.0649295	0.989186	3	3	3
O88736	Hsd17b7	hydroxysteroid (17-beta) dehydrogenase 7	15490	O88736	0.343155	0.880448	Inf	0	#NAME?	0	1	2	0
O88738	Birc6	baculoviral IAP repeat-containing 6	12211	O88738	-1.95567	0.012441	-1.48687	0.0342196	-0.468802	0.717576	3	3	3
O88746	Tom1	target of myb1 trafficking protein	21968	O88746	-2.04788	0.0439256	-1.44063	0.119491	-0.607244	0.721531	2	3	3
O88792	F11r	F11 receptor	16456	O88792	-2.64758	0.055853	-1.72264	0.180572	-0.924938	0.740446	3	3	3
O88796	Rpp30	ribonuclease P/MRP 30 subunit	54364	O88796	-1.65931	0.458396	Inf	0	#NAME?	0	2	1	0
O88811	Stam2	signal transducing adaptor molecule (SH3 domain and ITAM motif) 2	56324	O88811	-1.62749	0.0229902	-1.07781	0.0883182	-0.549678	0.669478	3	3	3
O88824	Jtb	jumping translocation breakpoint	23922	O88824	#NAME?	0	#NAME?	0	-0.434341	0.873403	0	3	2
O88842	O88842	NA	NA	O88842	#NAME?	0	#NAME?	0	-0.297693	0.925985	0	1	2
O88844	Idh1	isocitrate dehydrogenase 1 (NADP+), soluble	15926	O88844	-0.816301	0.206024	-0.830266	0.220768	0.0139646	0.996002	3	3	3
O88845	Akap10	A kinase (PRKA) anchor protein 10	56697	O88845	#NAME?	0	#NAME?	0	-0.539806	0.956906	0	1	2
O88851	Rbbp9	retinoblastoma binding protein 9, serine hydrolase	26450	O88851	#NAME?	0	#NAME?	0	0.168582	0.978601	0	1	2
O88874	O88874	NA	NA	O88874	#NAME?	0	#NAME?	0	-0.312421	0.964154	0	2	2
O88878	Zfand5	zinc finger, AN1-type domain 5	22682	O88878	-0.75773	NA	0.0326136	NA	-0.790343	NA	1	1	1
O88879	Apaf1	apoptotic peptidase activating factor 1	11783	O88879	-0.60709	0.559055	0.699615	0.592036	-1.3067	0.718522	1	2	1
O88952	Lin7c	lin-7 homolog C (C. elegans)	22343	O88952	-0.110084	0.724321	-1.2736	0.0490104	1.16352	0.249525	1	3	2
O88958	Gnpda1	glucosamine-6-phosphate deaminase 1	26384	O88958	#NAME?	0	#NAME?	0	0.113284	0.990855	0	3	1
O88967	Yme1l1	YME1-like 1 (S. cerevisiae)	27377	O88967	-0.530348	0.283937	-0.680308	0.202841	0.14996	0.929012	3	3	3
O88974	O88974	NA	NA	O88974	#NAME?	0	#NAME?	0	0.582058	0.777974	0	3	2
O88983	Stx8	syntaxin 8	55943	O88983	#NAME?	0	#NAME?	0	-0.412712	0.638392	0	3	3
O88986	Gcat	glycine C-acetyltransferase (2-amino-3-ketobutyrate-coenzyme A ligase)	26912	O88986	-1.39585	0.136625	-0.348263	0.713868	-1.04759	0.629996	3	3	3
O89001	Cpd	carboxypeptidase D	12874	O89001	#NAME?	0	#NAME?	0	-1.07074	0.645899	0	3	3
O89023	Tpp1	tripeptidyl peptidase I	12751	O89023	-1.46142	0.245199	-2.00867	0.154901	0.547245	0.854812	2	3	3
O89050	Mkln1	muskelin 1, intracellular mediator containing kelch motifs	27418	O89050	-1.64159	0.103749	-2.13097	0.0712406	0.489379	0.73255	1	3	3
O89051	Itm2b	integral membrane protein 2B	16432	O89051	#NAME?	0	#NAME?	0	-0.343685	0.591859	0	2	1
O89079	Cope	coatomer protein complex, subunit epsilon	59042	O89079	-0.23156	0.74546	-0.396337	0.595311	0.164777	0.953983	3	3	3
O89086	Rbm3	RNA binding motif (RNP1, RRM) protein 3	19652	O89086	-0.79086	0.0150019	-0.716699	0.0253204	-0.0741602	0.923001	3	3	3
O89090	Sp1	trans-acting transcription factor 1	20683	O89090	-2.79629	0.0202063	-1.5643	0.104623	-1.23199	0.496886	2	3	3
O89112	Lancl1	LanC (bacterial lantibiotic synthetase component C)-like 1	14768	O89112	0.97351	0.832755	1.75696	0.639218	-0.783454	0.969164	3	1	2
P00329	Adh1	alcohol dehydrogenase 1 (class I)	11522	P00329	-6.23629	0.0022524	-5.75345	0.0037465	-0.482839	0.767647	2	3	3
P00342	Ldhc	lactate dehydrogenase C	16833	P00342	3.00897	0.0344013	2.4007	0.0766204	0.608262	0.831605	3	3	3
P00375	Dhfr	dihydrofolate reductase	13361	P00375	1.2857	0.187584	0.300778	0.771508	0.984924	0.669485	3	3	3
P00405	COX2	cytochrome c oxidase subunit II	17709	P00405	0.896052	0.067107	2.42864	0.00503736	-1.53259	0.224074	3	3	3
P00493	Hprt	hypoxanthine guanine phosphoribosyl transferase	15452	P00493	0.31245	0.44047	-0.144382	0.752538	0.456832	0.653231	3	3	3
P00520	Abl1	c-abl oncogene 1, non-receptor tyrosine kinase	11350	P00520	3.50356	0.489531	Inf	0	#NAME?	0	3	1	0
P01027	C3	complement component 3	12266	P01027	4.98915	0.0238606	6.69101	0.01668	-1.70186	0.634892	3	2	2
P01837	P01837	NA	NA	P01837	3.48817	0.0301534	3.38742	0.038042	0.100754	0.958335	3	1	1
P01878	P01878	NA	NA	P01878	6.87805	0.0600978	Inf	0	#NAME?	0	3	1	0
P01942	P01942	NA	NA	P01942	7.98456	0.0229902	8.02724	0.0279456	-0.0426786	0.997073	3	2	2
P02088	Hbb-b1	hemoglobin, beta adult major chain	15129	P02088	2.91473	0.300249	4.68013	0.182053	-1.7654	0.822101	3	3	2
P02463	Col4a1	collagen, type IV, alpha 1	12826	P02463	#NAME?	0	#NAME?	0	-2.17541	0.54263	0	3	2
P02468	P02468	NA	NA	P02468	-3.46215	0.0496482	-2.71095	0.107159	-0.751195	0.810691	2	3	3
P02469	Lamb1	laminin B1	16777	P02469	-6.22949	0.000705404	-5.34238	0.00124989	-0.887109	0.409399	2	3	3
P02535	Krt10	keratin 10	16661	P02535	3.00347	0.243125	3.15283	0.244424	-0.149359	0.989186	3	3	3
P02798	Mt2	metallothionein 2	17750	P02798	-9.14127	0.00781386	-7.85957	0.0137741	-1.2817	0.788069	3	3	3
P02802	Mt1	metallothionein 1	17748	P02802	#NAME?	0	#NAME?	0	1.38475	0.831243	0	3	3
P03930	ATP8	ATP synthase F0 subunit 8	17706	P03930	#NAME?	0	#NAME?	0	-1.35503	0.636311	0	3	3
P03958	Ada	adenosine deaminase	11486	P03958	1.1976	0.148919	0.886446	0.288141	0.311149	0.901842	3	3	3
P03975	P03975	NA	NA	P03975	-3.25377	0.00836603	-1.87032	0.0467419	-1.38345	0.427141	3	3	3
P04104	Krt1	keratin 1	16678	P04104	0.696935	0.857818	-0.0198128	0.996591	0.716748	0.958335	3	3	3
P04184	Tk1	thymidine kinase 1	21877	P04184	-2.52065	0.01225	-1.89564	0.0318445	-0.625006	0.629996	2	3	3
P04627	Araf	Araf proto-oncogene, serine/threonine kinase	11836	P04627	#NAME?	0	#NAME?	0	-0.145381	0.982545	0	2	2
P05064	Aldoa	aldolase A, fructose-bisphosphate	11674	P05064	-0.13105	0.817588	-0.772248	0.191587	0.641198	0.63017	3	3	3
P05132	Prkaca	protein kinase, cAMP dependent, catalytic, alpha	18747	P05132	#NAME?	0	#NAME?	0	-1.86572	0.742226	0	2	1
P05201	Got1	glutamic-oxaloacetic transaminase 1, soluble	14718	P05201	-2.19493	0.0382633	-2.39626	0.0361506	0.201329	0.952873	3	3	3
P05202	Got2	glutamatic-oxaloacetic transaminase 2, mitochondrial	14719	P05202	-3.70217	0.0422106	-2.38504	0.125072	-1.31713	0.564601	1	3	3
P05214	Tuba3a	tubulin, alpha 3A	22144	P05214	-2.10704	0.272921	-0.779993	0.663218	-1.32705	0.748749	2	2	3
P05480	Src	Rous sarcoma oncogene	20779	P05480	-2.49429	0.168551	-2.1599	0.237876	-0.334391	0.930686	1	3	3
P05784	Krt18	keratin 18	16668	P05784	-2.99555	0.00102478	-3.38489	0.000983814	0.389332	0.641035	3	3	3
P06151	Ldha	lactate dehydrogenase A	16828	P06151	-1.66672	0.0738854	-3.2641	0.0145332	1.59738	0.425243	3	3	3
P06745	Gpi1	glucose-6-phosphate isomerase 1	14751	P06745	-0.613433	0.507751	-0.300235	0.773107	-0.313198	0.925985	3	3	3
P06797	Ctsl	cathepsin L	13039	P06797	#NAME?	0	#NAME?	0	-4.27481	0.271295	0	2	1
P06801	Me1	malic enzyme 1, NADP(+)-dependent, cytosolic	17436	P06801	0.668401	0.260345	-0.22953	0.719317	0.897931	0.538434	3	3	3
P06802	Enpp1	ectonucleotide pyrophosphatase/phosphodiesterase 1	18605	P06802	#NAME?	0	#NAME?	0	0.119744	0.978601	0	3	3
P07214	Sparc	secreted acidic cysteine rich glycoprotein	20692	P07214	#NAME?	0	#NAME?	0	-1.42645	0.636311	0	2	2
P07356	Anxa2	annexin A2	12306	P07356	-2.62019	0.00128226	-2.3795	0.00220693	-0.240692	0.755798	3	3	3
P07607	Tyms	thymidylate synthase	22171	P07607	0.151404	0.937408	0.642717	0.710999	-0.491312	0.929012	3	3	3
P07724	Alb	albumin	11657	P07724	4.78552	0.00401509	4.46208	0.00580362	0.323449	0.901842	3	3	3
P07742	Rrm1	ribonucleotide reductase M1	20133	P07742	-1.7965	0.210444	-1.5733	0.290084	-0.2232	0.972513	3	3	3
P07758	Serpina1a	serine (or cysteine) peptidase inhibitor, clade A, member 1A	20700	P07758	#NAME?	0	#NAME?	0	-0.16197	0.954825	0	2	1
P07901	Hsp90aa1	heat shock protein 90, alpha (cytosolic), class A member 1	15519	P07901	0.03729	0.880779	-0.74149	0.0237419	0.77878	0.224074	3	3	3
P08003	Pdia4	protein disulfide isomerase associated 4	12304	P08003	-1.9832	0.00889739	-1.87669	0.0128782	-0.106506	0.953983	3	3	3
P08030	Aprt	adenine phosphoribosyl transferase	11821	P08030	-0.533018	0.820272	-1.00004	0.679047	0.467025	0.958335	3	3	3
P08043	Zfp2	zinc finger protein 2	22678	P08043	1.42781	0.755265	-0.605628	0.906368	2.03343	0.837154	1	2	2
P08071	Ltf	lactotransferrin	17002	P08071	Inf	0	Inf	0	NA	NA	3	0	0
P08074	Cbr2	carbonyl reductase 2	12409	P08074	-0.824914	0.880437	-1.49975	0.784231	0.674833	0.970635	1	2	2
P08113	Hsp90b1	heat shock protein 90, beta (Grp94), member 1	22027	P08113	0.165198	0.595861	0.205561	0.537743	-0.040363	0.977657	3	3	3
P08122	Col4a2	collagen, type IV, alpha 2	12827	P08122	#NAME?	0	#NAME?	0	-2.07377	0.486009	0	3	2
P08207	S100a10	S100 calcium binding protein A10 (calpactin)	20194	P08207	-2.46426	0.298079	-3.89571	0.145392	1.43145	0.816582	3	3	3
P08226	Apoe	apolipoprotein E	11816	P08226	-2.79902	0.0237019	-2.0268	0.0654673	-0.772221	0.676625	2	3	3
P08228	Sod1	superoxide dismutase 1, soluble	20655	P08228	1.68036	0.105675	0.994001	0.321158	0.686361	0.765524	3	3	3
P08249	Mdh2	malate dehydrogenase 2, NAD (mitochondrial)	17448	P08249	-0.160589	0.707356	-0.22236	0.623734	0.0617705	0.97646	3	3	3
P08752	Gnai2	guanine nucleotide binding protein (G protein), alpha inhibiting 2	14678	P08752	-1.71133	0.0150024	-1.29867	0.0410609	-0.412654	0.722675	3	3	3
P08775	Polr2a	polymerase (RNA) II (DNA directed) polypeptide A	20020	P08775	-1.64682	0.0597622	-1.05725	0.191548	-0.589567	0.740446	3	3	3
P08905	Lyz2	lysozyme 2	17105	P08905	Inf	0	Inf	0	NA	NA	3	0	0
P09055	Itgb1	integrin beta 1 (fibronectin receptor beta)	16412	P09055	-3.48699	0.000191874	-2.35873	0.000790759	-1.12826	0.207564	3	3	3
P09103	P4hb	prolyl 4-hydroxylase, beta polypeptide	18453	P09103	-0.553688	0.0225294	-0.649279	0.0186048	0.0955907	0.835403	3	3	3
P09242	Alpl	alkaline phosphatase, liver/bone/kidney	11647	P09242	-1.2276	0.01225	-0.247047	0.462702	-0.980548	0.231382	3	3	3
P09405	Ncl	nucleolin	17975	P09405	-0.679277	0.0738854	-1.01735	0.0299632	0.33807	0.687375	3	3	3
P09411	Pgk1	phosphoglycerate kinase 1	18655	P09411	0.071642	0.9275	-0.628073	0.375942	0.699715	0.669478	3	3	3
P09602	Hmgn2	high mobility group nucleosomal binding domain 2	15331	P09602	-3.91711	0.06266	-4.93198	0.0460758	1.01487	0.81747	3	2	2
P09671	Sod2	superoxide dismutase 2, mitochondrial	20656	P09671	0.766485	0.352372	0.200973	0.828732	0.565513	0.778902	3	3	3
P09803	Cdh1	cadherin 1	12550	P09803	-1.71833	0.0138633	-1.72755	0.018438	0.00921773	0.997073	3	3	3
P09925	Surf1	surfeit gene 1	20930	P09925	-0.0708828	0.978504	Inf	0	#NAME?	0	3	1	0
P09926	Surf2	surfeit gene 2	20931	P09926	-2.13873	0.0811189	-0.59853	0.608359	-1.5402	0.566667	3	3	3
P0C0S6	H2az1	H2A.Z variant histone 1	51788	P0C0S6	-0.383331	0.577439	-1.01569	0.183939	0.632361	0.718522	3	3	3
P0C8B4	Gon7	GON7 subunit of KEOPS complex	100233175	P0C8B4	#NAME?	0	#NAME?	0	-0.267747	0.878195	0	2	1
P0DJF2	Pet117	PET117 homolog	100048644	P0DJF2	#NAME?	0	NA	NA	#NAME?	0	0	3	0
P0DN89	Tmem254a	transmembrane protein 254a	66039	P0DN89	-0.0507432	0.984659	Inf	0	#NAME?	0	2	1	0
P0DP26	Calm1	calmodulin 1	12313	P0DP26	0.341065	0.704666	0.468979	0.623165	-0.127913	0.97646	3	3	3
P10107	Anxa1	annexin A1	16952	P10107	-0.836231	0.804929	-1.3281	0.707519	0.491868	0.975542	3	3	3
P10126	Eef1a1	eukaryotic translation elongation factor 1 alpha 1	13627	P10126	0.854457	0.198802	0.474456	0.486247	0.380001	0.819802	3	3	3
P10493	Nid1	nidogen 1	18073	P10493	-4.18653	0.0265183	-2.2921	0.115751	-1.89443	0.401233	1	3	3
P10518	Alad	aminolevulinate, delta-, dehydratase	17025	P10518	-1.86495	0.0396417	-1.93509	0.0429491	0.070136	0.982377	3	3	3
P10605	Ctsb	cathepsin B	13030	P10605	4.12026	0.0631778	3.92755	0.0880858	0.19271	0.982377	3	3	3
P10630	Eif4a2	eukaryotic translation initiation factor 4A2	13682	P10630	0.468779	0.855065	1.10827	0.653826	-0.639491	0.929012	1	1	2
P10639	Txn1	thioredoxin 1	22166	P10639	-1.55593	0.177216	-1.80294	0.149005	0.24701	0.956906	3	3	3
P10711	Tcea1	transcription elongation factor A (SII) 1	21399	P10711	0.222811	0.88915	-1.1575	0.437305	1.38031	0.688053	3	3	3
P10761	Zp3	zona pellucida glycoprotein 3	22788	P10761	-0.0199511	0.975071	-0.175373	0.752538	0.155421	0.929012	3	3	3
P10852	Slc3a2	solute carrier family 3 (activators of dibasic and neutral amino acid transport), member 2	17254	P10852	-1.75332	0.027069	-1.19828	0.0944268	-0.555043	0.707521	3	3	3
P10922	H1f0	H1.0 linker histone	14958	P10922	-2.78166	0.0414497	-1.5427	0.181563	-1.23896	0.587635	2	3	3
P10923	Spp1	secreted phosphoprotein 1	20750	P10923	0.0526315	0.977982	1.15893	0.453529	-1.10629	0.755798	1	1	3
P11031	Sub1	SUB1 homolog, transcriptional regulator	20024	P11031	-2.57441	0.0134409	-0.408993	0.577215	-2.16542	0.231382	3	3	3
P11103	P11103	NA	NA	P11103	-0.393314	0.634263	-0.0607969	0.954074	-0.332517	0.901842	3	3	3
P11152	Lpl	lipoprotein lipase	16956	P11152	#NAME?	0	#NAME?	0	-0.343464	0.927625	0	3	1
P11157	Rrm2	ribonucleotide reductase M2	20135	P11157	0.730401	0.0678028	0.479385	0.202754	0.251016	0.765633	3	3	3
P11214	Plat	plasminogen activator, tissue	18791	P11214	2.60137	0.0238606	5.127	0.00425462	-2.52563	0.238159	3	3	3
P11260	P11260	NA	NA	P11260	#NAME?	0	#NAME?	0	0.750863	0.623204	0	3	2
P11276	Fn1	fibronectin 1	14268	P11276	-1.26161	0.214683	-1.34998	0.175054	0.0883723	0.982759	3	2	3
P11352	Gpx1	glutathione peroxidase 1	14775	P11352	1.95029	0.110405	2.17189	0.10247	-0.2216	0.958335	3	3	3
P11404	Fabp3	fatty acid binding protein 3, muscle and heart	14077	P11404	-2.95212	0.0243447	-3.71275	0.0165317	0.760628	0.745136	3	3	3
P11438	Lamp1	lysosomal-associated membrane protein 1	16783	P11438	-1.02916	0.306558	-0.487012	0.650729	-0.542144	0.835659	3	3	3
P11440	Cdk1	cyclin-dependent kinase 1	12534	P11440	1.25525	0.0269814	1.2373	0.0345415	0.0179447	0.990855	3	3	3
P11499	Hsp90ab1	heat shock protein 90 alpha (cytosolic), class B member 1	15516	P11499	0.201105	0.418795	-0.22794	0.397815	0.429045	0.498555	3	3	3
P11672	Lcn2	lipocalin 2	16819	P11672	Inf	0	Inf	0	NA	NA	3	0	0
P11679	Krt8	keratin 8	16691	P11679	-2.49995	0.000838365	-3.15057	0.000790759	0.650626	0.324994	3	3	3
P11688	Itga5	integrin alpha 5 (fibronectin receptor alpha)	16402	P11688	-1.32465	0.316009	0.261971	0.870173	-1.58662	0.629996	2	3	2
P11983	Tcp1	t-complex protein 1	21454	P11983	-0.293895	0.174015	-0.318112	0.169197	0.0242161	0.978601	3	3	3
P12367	P12367	NA	NA	P12367	-1.83167	0.105929	-1.19788	0.274969	-0.633792	0.811926	3	3	3
P12382	Pfkl	phosphofructokinase, liver, B-type	18641	P12382	0.843806	0.531075	-1.18814	0.370595	2.03194	0.561833	3	2	3
P12658	Calb1	calbindin 1	12307	P12658	Inf	0	NA	NA	Inf	0	3	0	0
P12787	Cox5a	cytochrome c oxidase subunit 5A	12858	P12787	-1.03513	0.154722	-0.707256	0.331561	-0.327878	0.864388	3	3	3
P12815	Pdcd6	programmed cell death 6	18570	P12815	1.14927	0.515071	1.28096	0.503201	-0.131696	0.986031	2	2	2
P12970	Rpl7a	ribosomal protein L7A	27176	P12970	-0.352297	0.18771	-0.379082	0.183318	0.0267854	0.982129	3	3	3
P13011	Scd2	stearoyl-Coenzyme A desaturase 2	20250	P13011	1.21154	0.31607	0.371547	0.678912	0.839992	0.728324	1	2	1
P13020	Gsn	gelsolin	227753	P13020	-1.86283	0.0631827	-1.67591	0.101832	-0.18692	0.957355	3	3	3
P13439	Umps	uridine monophosphate synthetase	22247	P13439	-1.49291	0.0954244	-1.31784	0.147196	-0.175074	0.957355	3	3	3
P13864	Dnmt1	DNA methyltransferase (cytosine-5) 1	13433	P13864	1.72615	0.012639	1.67065	0.0186048	0.0555084	0.978601	3	3	3
P14069	S100a6	S100 calcium binding protein A6 (calcyclin)	20200	P14069	0.334445	0.803561	0.310455	0.833001	0.02399	0.997073	3	2	2
P14094	Atp1b1	ATPase, Na+/K+ transporting, beta 1 polypeptide	11931	P14094	-3.75014	0.00908625	-2.33483	0.0355323	-1.41531	0.412412	2	3	3
P14115	Rpl27a	ribosomal protein L27A	26451	P14115	-1.34673	0.103947	-1.24742	0.144025	-0.099308	0.97646	3	3	3
P14131	Rps16	ribosomal protein S16	20055	P14131	0.253138	0.672335	-0.149429	0.824099	0.402567	0.780086	3	3	3
P14148	Rpl7	ribosomal protein L7	19989	P14148	-0.245928	0.408111	-0.32502	0.31024	0.079092	0.943574	3	3	3
P14152	Mdh1	malate dehydrogenase 1, NAD (soluble)	17449	P14152	0.48112	0.242349	0.016498	0.975276	0.464622	0.638219	3	3	3
P14206	Rpsa	ribosomal protein SA	16785	P14206	0.718409	0.187584	0.442294	0.428035	0.276114	0.844964	3	3	3
P14211	Calr	calreticulin	12317	P14211	-1.15922	0.0238606	-1.29438	0.0221132	0.135158	0.916932	3	3	3
P14576	Srp54a	signal recognition particle 54A	24067	P14576	-1.53878	0.0589381	-0.868647	0.238425	-0.670137	0.688232	3	3	3
P14602	Hspb1	heat shock protein 1	15507	P14602	-0.810734	0.43614	-0.91642	0.417928	0.105685	0.982377	3	3	3
P14685	Psmd3	proteasome (prosome, macropain) 26S subunit, non-ATPase, 3	22123	P14685	1.06353	0.135547	0.91453	0.205937	0.148996	0.956906	3	3	3
P14733	Lmnb1	lamin B1	16906	P14733	-1.71169	0.00175488	-1.45534	0.0041835	-0.25635	0.661654	3	3	3
P14824	Anxa6	annexin A6	11749	P14824	-1.28858	0.0260813	-1.20927	0.0386778	-0.0793101	0.962224	3	3	3
P14869	Rplp0	ribosomal protein, large, P0	11837	P14869	-0.0417134	0.961642	-0.568869	0.442603	0.527156	0.755798	3	3	3
P14901	Hmox1	heme oxygenase 1	15368	P14901	-0.698774	0.347658	0.107372	0.899288	-0.806146	0.626382	2	3	3
P15105	Glul	glutamate-ammonia ligase (glutamine synthetase)	14645	P15105	-0.899155	0.119152	-1.75246	0.0244171	0.853304	0.522267	3	3	3
P15265	Smcp	sperm mitochondria-associated cysteine-rich protein	17235	P15265	#NAME?	0	#NAME?	0	1.68384	0.698966	0	3	3
P15327	Bpgm	2,3-bisphosphoglycerate mutase	12183	P15327	2.26919	0.00200192	2.42579	0.00220693	-0.156603	0.863855	3	3	3
P15532	Nme1	NME/NM23 nucleoside diphosphate kinase 1	18102	P15532	2.27713	0.336965	0.220516	0.936869	2.05662	0.690167	2	3	3
P15864	H1f2	H1.2 linker histone, cluster member	50708	P15864	NA	NA	NA	NA	-0.214536	0.999867	1	3	3
P16045	Lgals1	lectin, galactose binding, soluble 1	16852	P16045	-5.43994	0.000963451	-5.55354	0.00112154	0.113596	0.961316	3	3	3
P16110	P16110	NA	NA	P16110	#NAME?	0	#NAME?	0	0.198617	0.910715	0	3	3
P16125	Ldhb	lactate dehydrogenase B	16832	P16125	1.96846	0.00872372	1.92444	0.0107471	0.0440207	0.982377	3	3	3
P16254	Srp14	signal recognition particle 14	20813	P16254	-0.577795	0.461217	0.133599	0.885402	-0.711394	0.721531	3	3	3
P16406	Enpep	glutamyl aminopeptidase	13809	P16406	-5.39788	0.00133952	-4.39786	0.00262579	-1.00002	0.231382	1	3	3
P16460	Ass1	argininosuccinate synthetase 1	11898	P16460	-1.81944	0.0393005	-1.9498	0.0394397	0.130358	0.961734	3	3	3
P16546	P16546	NA	NA	P16546	-0.986704	0.0474282	-0.711202	0.128665	-0.275502	0.780086	3	3	3
P16675	Ctsa	cathepsin A	19025	P16675	-1.01326	0.393357	-2.08638	0.128407	1.07312	0.720192	3	3	3
P16858	Gapdh	glyceraldehyde-3-phosphate dehydrogenase	14433	P16858	0.804907	0.393079	0.471817	0.643421	0.33309	0.918912	3	3	3
P17047	Lamp2	lysosomal-associated membrane protein 2	16784	P17047	0.165931	0.920506	0.237721	0.883128	-0.0717895	0.989842	3	3	3
P17156	Hspa2	heat shock protein 2	15512	P17156	0.741977	0.634263	1.14726	0.493158	-0.405285	0.91412	1	3	3
P17182	Eno1	enolase 1, alpha non-neuron	13806	P17182	-0.590495	0.339036	-1.3788	0.0699686	0.788304	0.610505	3	3	3
P17225	P17225	NA	NA	P17225	0.355107	0.52058	-0.245027	0.688375	0.600134	0.668067	3	3	3
P17426	Ap2a1	adaptor-related protein complex 2, alpha 1 subunit	11771	P17426	-1.05381	0.526375	-0.944734	0.602808	-0.109078	0.987485	2	3	3
P17427	Ap2a2	adaptor-related protein complex 2, alpha 2 subunit	11772	P17427	-2.93677	0.0222775	-2.48466	0.0433928	-0.452106	0.861639	3	3	3
P17665	Cox7c	cytochrome c oxidase subunit 7C	12867	P17665	1.92968	0.272382	2.15557	0.249923	-0.225886	0.929012	1	1	2
P17710	Hk1	hexokinase 1	15275	P17710	-1.54361	0.132757	-2.75975	0.0347085	1.21615	0.610505	3	3	3
P17742	Ppia	peptidylprolyl isomerase A	268373	P17742	-0.561819	0.0690139	-0.988643	0.0186048	0.426824	0.522267	3	3	3
P17751	Tpi1	triosephosphate isomerase 1	21991	P17751	-2.19724	0.00284735	-2.05444	0.00454776	-0.142798	0.896671	3	3	3
P17809	Slc2a1	solute carrier family 2 (facilitated glucose transporter), member 1	20525	P17809	-1.12722	0.405834	-2.16982	0.157538	1.0426	0.755798	3	3	3
P17918	Pcna	proliferating cell nuclear antigen	18538	P17918	-0.322419	0.402595	-0.56461	0.187201	0.24219	0.810691	3	3	3
P18052	Ptpra	protein tyrosine phosphatase, receptor type, A	19262	P18052	#NAME?	0	#NAME?	0	-2.3778	0.687467	0	1	2
P18155	Mthfd2	methylenetetrahydrofolate dehydrogenase (NAD+ dependent), methenyltetrahydrofolate cyclohydrolase	17768	P18155	#NAME?	0	#NAME?	0	-0.683248	0.954825	0	2	2
P18242	Ctsd	cathepsin D	13033	P18242	3.30167	0.00192105	2.67349	0.00507395	0.628181	0.584517	3	3	3
P18572	Bsg	basigin	12215	P18572	-1.53652	0.0448278	-0.886775	0.192962	-0.649746	0.672827	3	3	3
P18653	Rps6ka1	ribosomal protein S6 kinase polypeptide 1	20111	P18653	-2.15827	0.3039	-1.78354	0.420835	-0.374729	0.963684	3	3	3
P18654	Rps6ka3	ribosomal protein S6 kinase polypeptide 3	110651	P18654	1.79562	0.660371	2.33519	0.617455	-0.539565	0.977657	2	1	1
P18760	Cfl1	cofilin 1, non-muscle	12631	P18760	-0.25237	0.731188	-0.357115	0.643463	0.104745	0.97646	3	3	3
P19001	Krt19	keratin 19	16669	P19001	-2.65571	0.227434	-2.08462	0.360025	-0.571097	0.929012	2	3	3
P19096	Fasn	fatty acid synthase	14104	P19096	-0.189517	0.772164	-0.480393	0.46875	0.290876	0.870514	3	3	3
P19137	Lama1	laminin, alpha 1	16772	P19137	#NAME?	0	#NAME?	0	-1.49589	0.493386	0	3	3
P19157	Gstp1	glutathione S-transferase, pi 1	14870	P19157	3.38185	0.0632187	2.93186	0.110213	0.449998	0.932664	3	3	3
P19253	Rpl13a	ribosomal protein L13A	22121	P19253	-0.823642	0.290264	-0.634711	0.4383	-0.188931	0.951631	3	3	3
P19324	Serpinh1	serine (or cysteine) peptidase inhibitor, clade H, member 1	12406	P19324	#NAME?	0	#NAME?	0	0.268974	0.958335	0	3	3
P19426	Nelfe	negative elongation factor complex member E, Rdbp	27632	P19426	-1.58068	0.401872	-2.20723	0.281964	0.626553	0.912899	2	3	3
P19536	P19536	NA	NA	P19536	-1.12694	0.213253	-0.000889302	0.999551	-1.12605	0.610505	3	3	3
P19783	Cox4i1	cytochrome c oxidase subunit 4I1	12857	P19783	-0.642151	0.100248	-0.410799	0.273277	-0.231352	0.791011	3	3	3
P20029	Hspa5	heat shock protein 5	14828	P20029	-0.474149	0.0551003	-0.568314	0.0404019	0.0941648	0.872586	3	3	3
P20060	Hexb	hexosaminidase B	15212	P20060	-2.49912	0.0283317	-1.97402	0.0626966	-0.525096	0.760531	2	3	3
P20065	Tmsb4x	thymosin, beta 4, X chromosome	19241	P20065	-2.6881	0.058799	-2.47284	0.0883009	-0.215261	0.963684	3	3	3
P20108	Prdx3	peroxiredoxin 3	11757	P20108	-0.104448	0.94223	-1.12391	0.36549	1.01946	0.721531	3	3	3
P20152	Vim	vimentin	22352	P20152	-2.00803	0.258728	0.622622	0.731978	-2.63065	0.425243	1	3	3
P20239	Zp2	zona pellucida glycoprotein 2	22787	P20239	0.225512	0.64655	0.149149	0.784139	0.0763622	0.974268	3	3	3
P20263	Pou5f1	POU domain, class 5, transcription factor 1	18999	P20263	1.24143	0.120467	1.48345	0.0935289	-0.242024	0.925985	3	3	3
P20334	Tnfrsf9	tumor necrosis factor receptor superfamily, member 9	21942	P20334	#NAME?	0	#NAME?	0	-2.25094	0.767647	0	2	1
P21107	Tpm3	tropomyosin 3, gamma	59069	P21107	-2.95454	0.00943396	-2.61317	0.017234	-0.341367	0.860022	3	3	3
P21126	Ubl4a	ubiquitin-like 4A	27643	P21126	#NAME?	0	#NAME?	0	-0.0566742	0.997073	0	3	1
P21271	P21271	NA	NA	P21271	-2.41604	0.00851806	-0.931149	0.130261	-1.48489	0.263929	3	3	3
P21278	Gna11	guanine nucleotide binding protein, alpha 11	14672	P21278	-2.35803	0.0785054	-0.872107	0.465424	-1.48592	0.562422	2	3	3
P21300	Akr1b7	aldo-keto reductase family 1, member B7	11997	P21300	#NAME?	0	#NAME?	0	1.39707	0.504548	0	3	3
P21460	Cst3	cystatin C	13010	P21460	0.776145	0.720852	0.364934	0.870173	0.41121	0.958335	2	2	3
P21619	Lmnb2	lamin B2	16907	P21619	-2.59119	0.0145232	-2.14644	0.0290106	-0.444754	0.748766	2	3	3
P21803	Fgfr2	fibroblast growth factor receptor 2	14183	P21803	-2.30353	0.0809179	-1.5785	0.191548	-0.725028	0.690167	1	3	3
P21956	Mfge8	milk fat globule EGF and factor V/VIII domain containing	17304	P21956	-1.44504	0.0970976	-1.12956	0.188858	-0.315478	0.901601	3	3	3
P22727	Wnt6	wingless-type MMTV integration site family, member 6	22420	P22727	-1.24522	0.351541	0.00542989	0.99731	-1.25065	0.702328	3	3	3
P22892	Ap1g1	adaptor protein complex AP-1, gamma 1 subunit	11765	P22892	0.203555	0.932405	-0.201873	0.934598	0.405427	0.956354	2	3	3
P22907	Hmbs	hydroxymethylbilane synthase	15288	P22907	#NAME?	0	#NAME?	0	0.460026	0.780086	0	3	3
P22935	Crabp2	cellular retinoic acid binding protein II	12904	P22935	#NAME?	0	#NAME?	0	-0.401657	0.951631	0	3	1
P23116	Eif3a	eukaryotic translation initiation factor 3, subunit A	13669	P23116	-0.857343	0.0403675	-0.471	0.19676	-0.386343	0.638219	3	3	3
P23198	P23198	NA	NA	P23198	-0.364544	0.328293	-0.529607	0.192224	0.165063	0.875243	3	3	3
P23242	Gja1	gap junction protein, alpha 1	14609	P23242	-1.14599	0.0247536	-0.161717	0.691621	-0.984273	0.301592	3	3	3
P23249	Mov10	Mov10 RISC complex RNA helicase	17454	P23249	#NAME?	0	#NAME?	0	-0.350038	0.895867	0	3	3
P23475	Xrcc6	X-ray repair complementing defective repair in Chinese hamster cells 6	14375	P23475	-2.22506	0.183989	-0.499689	0.760251	-1.72537	0.538912	1	3	3
P23492	Pnp	purine-nucleoside phosphorylase	18950	P23492	-2.33613	0.327509	-1.49162	0.425828	-0.844507	0.81747	1	1	2
P23591	Gfus	GDP-L-fucose synthase	22122	P23591	-0.113907	0.870841	0.520952	0.484739	-0.63486	0.687467	1	2	2
P23772	Gata3	GATA binding protein 3	14462	P23772	-4.83533	0.172456	-2.6213	0.439561	-2.21403	0.693072	1	3	3
P23949	Zfp36l2	zinc finger protein 36, C3H type-like 2	12193	P23949	#NAME?	0	NA	NA	#NAME?	0	0	3	0
P24270	Cat	catalase	12359	P24270	-0.836944	0.568655	-1.1825	0.458905	0.345553	0.925985	1	3	3
P24288	Bcat1	branched chain aminotransferase 1, cytosolic	12035	P24288	1.6158	0.276148	1.03298	0.503359	0.582823	0.901842	3	3	3
P24369	Ppib	peptidylprolyl isomerase B	19035	P24369	-0.980122	0.0301396	-1.28057	0.018438	0.300447	0.721531	3	3	3
P24452	P24452	NA	NA	P24452	-5.04657	0.00797928	-4.80622	0.0105795	-0.240352	0.956949	3	3	3
P24472	Gsta4	glutathione S-transferase, alpha 4	14860	P24472	1.07461	0.268649	0.491886	0.633888	0.582725	0.817169	3	3	3
P24527	Lta4h	leukotriene A4 hydrolase	16993	P24527	-4.09088	0.06266	-3.97295	0.0825966	-0.117936	0.986546	2	3	3
P24547	Impdh2	inosine monophosphate dehydrogenase 2	23918	P24547	-0.126354	0.765713	-0.474471	0.27789	0.348117	0.724864	3	3	3
P24549	Aldh1a1	aldehyde dehydrogenase family 1, subfamily A1	11668	P24549	#NAME?	0	#NAME?	0	-0.987028	0.571321	0	2	1
P24668	M6pr	mannose-6-phosphate receptor, cation dependent	17113	P24668	-0.524033	0.475159	-0.75524	0.343067	0.231207	0.929012	3	3	3
P24788	Cdk11b	cyclin-dependent kinase 11B	12537	P24788	-2.59038	0.0388864	-1.77906	0.121343	-0.811325	0.740311	3	3	3
P24823	Alppl2	alkaline phosphatase, placental-like 2	11650	P24823	-2.21207	0.144555	-1.57199	0.301069	-0.640079	0.875071	3	3	3
P24860	Ccnb1	cyclin B1	268697	P24860	0.091844	0.921581	0.638308	0.439168	-0.546464	0.776139	3	3	3
P25206	Mcm3	minichromosome maintenance complex component 3	17215	P25206	-0.546434	0.136862	-0.65127	0.109107	0.104837	0.929012	3	3	3
P25425	Pou2f1	POU domain, class 2, transcription factor 1	18986	P25425	#NAME?	0	#NAME?	0	1.02414	0.932664	0	2	1
P25444	Rps2	ribosomal protein S2	16898	P25444	0.118784	0.782742	-0.533474	0.231856	0.652258	0.52297	3	3	3
P25911	Lyn	LYN proto-oncogene, Src family tyrosine kinase	17096	P25911	-0.675429	0.462402	-0.703658	0.503201	0.0282289	0.990855	1	3	2
P25976	P25976	NA	NA	P25976	-3.98054	0.0111315	-3.30577	0.0236732	-0.674777	0.780086	3	3	3
P26039	Tln1	talin 1	21894	P26039	-3.52753	0.00135279	-3.20215	0.00232522	-0.325382	0.765524	3	3	3
P26040	Ezr	ezrin	22350	P26040	-2.1939	0.06329	-2.39349	0.0619487	0.199593	0.959132	3	3	3
P26041	Msn	moesin	17698	P26041	-5.67179	0.000963451	-4.97728	0.00176094	-0.694515	0.651126	3	3	3
P26043	Rdx	radixin	19684	P26043	0.339362	0.437473	0.85007	0.107891	-0.510708	0.640188	3	3	3
P26187	Mgmt	O-6-methylguanine-DNA methyltransferase	17314	P26187	#NAME?	0	#NAME?	0	0.489493	0.910715	0	2	1
P26231	Ctnna1	catenin (cadherin associated protein), alpha 1	12385	P26231	-1.30815	0.0730098	-1.05563	0.145431	-0.252518	0.9021	3	3	3
P26350	Ptma	prothymosin alpha	19231	P26350	-2.38627	0.136862	-2.17777	0.186259	-0.208494	0.97646	3	3	3
P26369	U2af2	U2 small nuclear ribonucleoprotein auxiliary factor (U2AF) 2	22185	P26369	-1.30477	0.0184421	-1.28015	0.0245003	-0.0246195	0.989186	3	3	3
P26443	Glud1	glutamate dehydrogenase 1	14661	P26443	-0.880433	0.00567589	-0.594244	0.0206279	-0.286189	0.498186	3	3	3
P26450	Pik3r1	phosphoinositide-3-kinase regulatory subunit 1	18708	P26450	-0.180578	0.84106	-0.234192	0.801004	0.0536133	0.989186	3	3	3
P26516	Psmd7	proteasome (prosome, macropain) 26S subunit, non-ATPase, 7	17463	P26516	0.114217	0.91141	-1.07898	0.301995	1.1932	0.626382	3	3	2
P26618	Pdgfra	platelet derived growth factor receptor, alpha polypeptide	18595	P26618	#NAME?	0	NA	NA	#NAME?	0	0	3	0
P26638	Sars	seryl-aminoacyl-tRNA synthetase	20226	P26638	-1.2885	0.0598904	-1.3248	0.0665603	0.0363056	0.989186	3	3	3
P26645	Marcks	myristoylated alanine rich protein kinase C substrate	17118	P26645	-2.19421	0.0260813	-1.64896	0.0699686	-0.545256	0.760531	3	3	3
P26883	Fkbp1a	FK506 binding protein 1a	14225	P26883	0.162925	0.795864	-0.419952	0.513366	0.582877	0.69879	3	3	3
P27046	Man2a1	mannosidase 2, alpha 1	17158	P27046	#NAME?	0	#NAME?	0	0.71749	0.637444	0	3	1
P27048	Snrpb	small nuclear ribonucleoprotein B	20638	P27048	-0.850074	0.236939	-0.747933	0.316696	-0.102141	0.97646	3	3	3
P27546	Map4	microtubule-associated protein 4	17758	P27546	-1.17001	0.0638782	-0.379532	0.504352	-0.790476	0.554496	3	3	3
P27601	Gna13	guanine nucleotide binding protein, alpha 13	14674	P27601	#NAME?	0	#NAME?	0	-1.55359	0.354191	0	2	2
P27612	Plaa	phospholipase A2, activating protein	18786	P27612	1.42549	0.00943396	1.47014	0.0100595	-0.0446512	0.97646	3	3	3
P27641	Xrcc5	X-ray repair complementing defective repair in Chinese hamster cells 5	22596	P27641	-0.154854	0.959944	-0.411615	0.887338	0.256762	0.97646	1	3	3
P27659	Rpl3	ribosomal protein L3	27367	P27659	-1.36327	0.0148675	-1.28783	0.0223273	-0.0754368	0.958335	3	3	3
P27661	H2ax	H2A.X variant histone	15270	P27661	#NAME?	0	#NAME?	0	-0.0598446	0.984529	0	3	3
P27773	Pdia3	protein disulfide isomerase associated 3	14827	P27773	-1.19542	0.00165396	-0.93228	0.00505838	-0.263141	0.522267	3	3	3
P28047	Wnt7b	wingless-type MMTV integration site family, member 7B	22422	P28047	#NAME?	0	NA	NA	#NAME?	0	0	2	0
P28271	Aco1	aconitase 1	11428	P28271	1.47087	0.617909	0.697145	0.838268	0.773722	0.944301	3	3	3
P28352	Apex1	apurinic/apyrimidinic endonuclease 1	11792	P28352	0.0175282	0.985314	-0.766587	0.408106	0.784115	0.720192	3	3	3
P28474	Adh5	alcohol dehydrogenase 5 (class III), chi polypeptide	11532	P28474	-0.614973	0.322769	-1.30949	0.0833425	0.694518	0.645899	3	3	3
P28574	P28574	NA	NA	P28574	-2.01478	0.158509	-0.540787	0.688514	-1.47399	0.538274	1	3	3
P28656	Nap1l1	nucleosome assembly protein 1-like 1	53605	P28656	1.99469	0.394873	1.12679	0.656961	0.867906	0.91412	3	3	3
P28658	Atxn10	ataxin 10	54138	P28658	-2.20105	0.0556735	-1.68631	0.127419	-0.514742	0.838744	3	3	3
P28659	Celf1	CUGBP, Elav-like family member 1	13046	P28659	-2.04313	0.0590176	-1.55801	0.134585	-0.485123	0.839395	3	3	3
P28660	Nckap1	NCK-associated protein 1	50884	P28660	-1.47726	0.317476	-1.93573	0.226255	0.458463	0.91853	2	3	3
P28667	Marcksl1	MARCKS-like 1	17357	P28667	-1.68483	0.0744425	-0.886081	0.314321	-0.798751	0.694252	3	3	3
P28740	Kif2a	kinesin family member 2A	16563	P28740	-0.109162	0.956505	0.648937	0.711233	-0.758099	0.866945	3	3	3
P28798	P28798	NA	NA	P28798	-0.544224	0.657817	-0.195561	0.890803	-0.348664	0.932961	3	3	3
P28867	Prkcd	protein kinase C, delta	18753	P28867	1.11211	0.4758	2.95101	0.138417	-1.8389	0.538912	1	3	3
P29341	Pabpc1	poly(A) binding protein, cytoplasmic 1	18458	P29341	-0.444537	0.071222	-0.689542	0.0263267	0.245005	0.640188	3	3	3
P29351	Ptpn6	protein tyrosine phosphatase, non-receptor type 6	15170	P29351	1.29066	0.440345	0.716584	0.698348	0.574071	0.910715	2	3	3
P29391	P29391	NA	NA	P29391	0.363518	0.789829	Inf	0	#NAME?	0	2	3	0
P29416	Hexa	hexosaminidase A	15211	P29416	-0.435094	0.770767	-0.465096	0.767547	0.0300021	0.995358	1	3	3
P29595	Nedd8	neural precursor cell expressed, developmentally down-regulated gene 8	18002	P29595	2.25848	0.286129	2.87116	0.208118	-0.612672	0.932664	3	3	3
P29699	Ahsg	alpha-2-HS-glycoprotein	11625	P29699	2.29441	0.44047	2.89248	0.421073	-0.598066	0.953983	2	1	1
P29758	Oat	ornithine aminotransferase	18242	P29758	-2.7428	0.0360478	-1.22023	0.206564	-1.52257	0.373957	1	3	3
P29788	Vtn	vitronectin	22370	P29788	1.30639	0.155563	1.56297	0.154901	-0.256584	0.941448	3	3	2
P30275	Ckmt1	creatine kinase, mitochondrial 1, ubiquitous	12716	P30275	-2.12118	0.00242973	-3.23655	0.000983814	1.11536	0.224074	3	3	3
P30416	Fkbp4	FK506 binding protein 4	14228	P30416	-1.27619	0.00450668	-1.65127	0.00225733	0.375083	0.508385	3	3	3
P30681	Hmgb2	high mobility group box 2	97165	P30681	-0.997523	0.0528469	-1.5405	0.0199476	0.542981	0.610566	3	3	3
P30999	Ctnnd1	catenin (cadherin associated protein), delta 1	12388	P30999	-0.665619	0.0741009	-0.580514	0.12383	-0.0851057	0.944301	3	3	3
P31230	P31230	NA	NA	P31230	-1.35408	0.0701563	-1.32166	0.0914422	-0.0324216	0.989842	3	3	3
P31266	Rbpj	recombination signal binding protein for immunoglobulin kappa J region	19664	P31266	1.02199	0.643577	1.03875	0.664514	-0.0167542	0.998407	1	3	3
P31750	Akt1	thymoma viral proto-oncogene 1	11651	P31750	#NAME?	0	#NAME?	0	-1.94254	0.610505	0	2	3
P31786	Dbi	diazepam binding inhibitor	13167	P31786	-0.974588	0.0401043	-0.671995	0.12383	-0.302594	0.740446	3	3	3
P31938	Map2k1	mitogen-activated protein kinase kinase 1	26395	P31938	0.154989	0.921581	0.40746	0.753116	-0.252472	0.961316	3	2	3
P32020	Scp2	sterol carrier protein 2, liver	20280	P32020	0.195097	0.76486	0.0639214	0.933843	0.131176	0.958335	3	3	3
P32037	Slc2a3	solute carrier family 2 (facilitated glucose transporter), member 3	20527	P32037	-1.51325	0.0375478	-1.00275	0.128774	-0.510503	0.721531	3	3	3
P32067	Ssb	Sjogren syndrome antigen B	20823	P32067	-0.635821	0.49211	-0.487232	0.632146	-0.148589	0.974069	3	3	3
P32233	Drg1	developmentally regulated GTP binding protein 1	13494	P32233	-0.463602	0.599463	-0.308691	0.753235	-0.154911	0.967986	3	3	3
P32261	Serpinc1	serine (or cysteine) peptidase inhibitor, clade C (antithrombin), member 1	11905	P32261	3.96426	0.0149321	Inf	0	#NAME?	0	3	2	0
P32507	Nectin2	nectin cell adhesion molecule 2	19294	P32507	-3.00186	0.0199552	-0.951071	0.326677	-2.05079	0.365935	3	3	3
P32921	Wars	tryptophanyl-tRNA synthetase	22375	P32921	-2.06207	0.0111315	-2.62463	0.00646827	0.56256	0.653231	3	3	3
P33174	Kif4	kinesin family member 4	16571	P33174	-2.34642	0.0434555	-2.57041	0.040852	0.223992	0.953738	3	3	3
P33215	Nedd1	neural precursor cell expressed, developmentally down-regulated gene 1	17997	P33215	-1.99057	0.44047	-0.898001	0.761278	-1.09257	0.838799	1	3	2
P33609	Pola1	polymerase (DNA directed), alpha 1	18968	P33609	#NAME?	0	#NAME?	0	-1.61123	0.235384	0	3	3
P34022	Ranbp1	RAN binding protein 1	19385	P34022	-1.57143	0.103947	-0.519642	0.579181	-1.05178	0.629037	3	3	3
P34056	Tfap2a	transcription factor AP-2, alpha	21418	P34056	-2.85549	0.303314	-2.4182	0.404158	-0.437289	0.953983	1	3	3
P34884	Mif	macrophage migration inhibitory factor (glycosylation-inhibiting factor)	17319	P34884	-0.204902	0.795864	-1.17792	0.169197	0.973018	0.610566	3	3	3
P35123	Usp4	ubiquitin specific peptidase 4 (proto-oncogene)	22258	P35123	#NAME?	0	#NAME?	0	-0.632435	0.86219	0	3	3
P35235	Ptpn11	protein tyrosine phosphatase, non-receptor type 11	19247	P35235	-0.0216863	0.975071	0.0419253	0.952265	-0.0636116	0.978601	3	3	3
P35278	Rab5c	RAB5C, member RAS oncogene family	19345	P35278	-0.0167673	0.996245	1.17203	0.692195	-1.18879	0.86219	2	3	3
P35279	Rab6a	RAB6A, member RAS oncogene family	19346	P35279	-0.958533	0.513339	-0.318479	0.856475	-0.640054	0.885674	3	3	3
P35282	Rab21	RAB21, member RAS oncogene family	216344	P35282	-0.797009	0.487033	0.0547487	0.97489	-0.851758	0.796621	3	3	2
P35283	Rab12	RAB12, member RAS oncogene family	19328	P35283	-1.49452	0.283339	-1.10476	0.413726	-0.38976	0.888166	1	2	2
P35285	Rab22a	RAB22A, member RAS oncogene family	19334	P35285	1.92814	0.226754	1.5685	0.304639	0.359643	0.918912	1	2	3
P35293	Rab18	RAB18, member RAS oncogene family	19330	P35293	-0.503529	0.652182	-1.2565	0.290084	0.752967	0.780086	3	3	3
P35486	Pdha1	pyruvate dehydrogenase E1 alpha 1	18597	P35486	-0.639207	0.00955693	-0.428769	0.0362648	-0.210438	0.568867	3	3	3
P35550	Fbl	fibrillarin	14113	P35550	-0.607327	0.374587	-0.202627	0.787679	-0.4047	0.81895	3	3	3
P35564	Canx	calnexin	12330	P35564	-1.29092	0.032693	-0.876131	0.110213	-0.414793	0.721531	3	3	3
P35585	Ap1m1	adaptor-related protein complex AP-1, mu subunit 1	11767	P35585	0.608602	0.419837	1.6547	0.0781269	-1.0461	0.584517	3	3	3
P35601	Rfc1	replication factor C (activator 1) 1	19687	P35601	-2.22095	0.0501936	0.707306	0.407001	-2.92825	0.22403	1	3	3
P35700	Prdx1	peroxiredoxin 1	18477	P35700	2.44776	0.00133952	1.79534	0.00471606	0.652413	0.401233	3	3	3
P35761	P35761	NA	NA	P35761	1.87114	0.222886	2.06917	0.231954	-0.198031	0.961316	1	3	2
P35821	Ptpn1	protein tyrosine phosphatase, non-receptor type 1	19246	P35821	-2.09948	0.0495445	-0.326848	0.680322	-1.77264	0.412412	3	2	3
P35831	Ptpn12	protein tyrosine phosphatase, non-receptor type 12	19248	P35831	#NAME?	0	#NAME?	0	2.78783	0.923001	0	3	1
P35846	Folr1	folate receptor 1 (adult)	14275	P35846	-4.77524	0.0604458	-3.09968	0.16696	-1.67556	0.623574	1	3	3
P35922	P35922	NA	NA	P35922	-2.96968	0.00469857	-2.40044	0.00988372	-0.569245	0.669478	3	3	3
P35951	Ldlr	low density lipoprotein receptor	16835	P35951	#NAME?	0	#NAME?	0	-0.0840817	0.985949	0	3	3
P35979	Rpl12	ribosomal protein L12	269261	P35979	0.0742138	0.778995	-0.232397	0.394011	0.306611	0.629037	3	3	3
P35980	Rpl18	ribosomal protein L18	19899	P35980	-0.374067	0.355964	-0.939615	0.0648022	0.565548	0.570642	3	3	3
P36552	Cpox	coproporphyrinogen oxidase	12892	P36552	-0.712241	0.595959	Inf	0	#NAME?	0	2	3	0
P36916	Gnl1	guanine nucleotide binding protein-like 1	14670	P36916	-0.628147	0.621865	-0.540582	0.697374	-0.0875648	0.982377	1	3	3
P36993	Ppm1b	protein phosphatase 1B, magnesium dependent, beta isoform	19043	P36993	-0.894989	0.58288	-0.0459544	0.98172	-0.849034	0.767647	1	3	3
P37040	Por	cytochrome p450 oxidoreductase	18984	P37040	-1.02648	0.272382	-1.05723	0.283045	0.0307523	0.993374	3	3	3
P37804	Tagln	transgelin	21345	P37804	Inf	0	Inf	0	NA	NA	3	0	0
P37913	Lig1	ligase I, DNA, ATP-dependent	16881	P37913	-2.62127	0.029159	-2.68811	0.0333795	0.0668327	0.987082	3	3	3
P38060	Hmgcl	3-hydroxy-3-methylglutaryl-Coenzyme A lyase	15356	P38060	0.00130584	0.99972	-1.6568	0.188018	1.65811	0.522267	2	3	3
P38532	Hsf1	heat shock factor 1	15499	P38532	#NAME?	0	#NAME?	0	-0.188482	0.953983	0	3	1
P38585	Ttl	tubulin tyrosine ligase	69737	P38585	-0.7047	0.598222	-0.487505	0.733826	-0.217196	0.958335	1	2	2
P38647	Hspa9	heat shock protein 9	15526	P38647	-0.77632	0.0718538	-0.567515	0.174956	-0.208805	0.831243	3	3	3
P39054	Dnm2	dynamin 2	13430	P39054	-1.22617	0.315726	0.401766	0.762947	-1.62794	0.584517	3	3	3
P39447	Tjp1	tight junction protein 1	21872	P39447	-1.87506	0.00133952	-1.91811	0.00169243	0.0430539	0.962129	3	3	3
P39689	Cdkn1a	cyclin-dependent kinase inhibitor 1A (P21)	12575	P39689	#NAME?	0	#NAME?	0	-0.960401	0.929012	0	1	2
P39749	P39749	NA	NA	P39749	-2.24869	0.132267	-3.69587	0.043537	1.44717	0.669485	3	3	3
P40124	Cap1	CAP, adenylate cyclase-associated protein 1 (yeast)	12331	P40124	-2.04087	0.00651884	-1.89336	0.00896326	-0.147505	0.916932	3	3	3
P40142	Tkt	transketolase	21881	P40142	0.414979	0.120425	0.164616	0.525416	0.250363	0.684914	3	3	3
P40201	Chd1	chromodomain helicase DNA binding protein 1	12648	P40201	#NAME?	0	#NAME?	0	1.20296	0.754899	0	2	1
P40237	Cd82	CD82 antigen	12521	P40237	#NAME?	0	#NAME?	0	-1.26839	0.740446	0	3	2
P40240	Cd9	CD9 antigen	12527	P40240	-1.60231	0.379599	0.480343	0.826137	-2.08265	0.646284	2	3	2
P40336	Vps26a	VPS26 retromer complex component A	30930	P40336	0.521408	0.508574	-0.00790123	0.993389	0.529309	0.791011	3	3	3
P40630	Tfam	transcription factor A, mitochondrial	21780	P40630	-0.0589884	0.935629	0.908231	0.175131	-0.967219	0.522267	3	3	3
P41105	Rpl28	ribosomal protein L28	19943	P41105	-1.27159	0.0742671	-0.701769	0.292396	-0.569822	0.718522	3	3	3
P41183	Bcl6	B cell leukemia/lymphoma 6	12053	P41183	-1.55553	0.166653	-1.96174	0.11564	0.406214	0.80585	1	1	3
P41216	Acsl1	acyl-CoA synthetase long-chain family member 1	14081	P41216	1.94597	0.0773845	2.28673	0.0625782	-0.340757	0.918912	3	3	3
P41241	Csk	c-src tyrosine kinase	12988	P41241	-0.497931	0.719456	-1.42323	0.343067	0.925297	0.707521	1	3	3
P41731	Cd63	CD63 antigen	12512	P41731	-1.1512	0.285373	-0.386836	0.734643	-0.764363	0.740446	2	3	3
P42125	Eci1	enoyl-Coenzyme A delta isomerase 1	13177	P42125	0.194451	0.951846	0.471238	0.872957	-0.276787	0.974739	1	3	3
P42128	Foxk1	forkhead box K1	17425	P42128	-0.341724	0.732047	-0.622853	0.513854	0.281129	0.929012	2	2	3
P42208	Septin2	septin 2	18000	P42208	-1.13483	0.362318	-1.2097	0.363493	0.0748616	0.989186	3	3	3
P42227	Stat3	signal transducer and activator of transcription 3	20848	P42227	-1.16522	0.141469	-1.32858	0.121831	0.16336	0.956906	3	3	3
P42567	Eps15	epidermal growth factor receptor pathway substrate 15	13858	P42567	#NAME?	0	#NAME?	0	0.0265847	0.997073	0	3	3
P42669	Pura	purine rich element binding protein A	19290	P42669	#NAME?	0	#NAME?	0	0.261597	0.780086	0	3	3
P42932	Cct8	chaperonin containing Tcp1, subunit 8 (theta)	12469	P42932	-0.450001	0.349419	-0.330752	0.51001	-0.119249	0.94947	3	3	3
P43241	Cdx2	caudal type homeobox 2	12591	P43241	#NAME?	0	#NAME?	0	-3.22189	0.207564	0	3	3
P43247	Msh2	mutS homolog 2	17685	P43247	-0.0670359	0.860858	-0.336387	0.364355	0.269351	0.753402	3	3	3
P43274	H1f4	H1.4 linker histone, cluster member	50709	P43274	-2.34408	0.0111315	-2.62156	0.00967755	0.277482	0.8655	3	3	3
P43275	H1f1	H1.1 linker histone, cluster member	80838	P43275	-0.998677	0.086958	-1.17859	0.0684821	0.179912	0.920596	3	3	3
P43276	H1f5	H1.5 linker histone, cluster member	56702	P43276	-1.954	0.0301772	-1.68581	0.0555306	-0.268194	0.903346	3	3	3
P43277	H1f3	H1.3 linker histone, cluster member	14957	P43277	-3.81142	0.00394117	-3.88939	0.00428988	0.0779716	0.978601	3	3	3
P43346	Dck	deoxycytidine kinase	13178	P43346	#NAME?	0	#NAME?	0	-1.02081	0.52576	0	3	1
P43406	Itgav	integrin alpha V	16410	P43406	-3.06105	0.0775399	-1.99672	0.21619	-1.06434	0.740446	2	3	3
P43883	Plin2	perilipin 2	11520	P43883	-0.54465	0.783725	0.563116	0.765353	-1.10777	0.821858	3	2	3
P45376	Akr1b3	aldo-keto reductase family 1, member B3 (aldose reductase)	11677	P45376	1.52448	0.000260438	1.59982	0.00024973	-0.0753442	0.761742	3	3	3
P45377	Akr1b8	aldo-keto reductase family 1, member B8	14187	P45377	-0.239912	0.437807	-0.37275	0.26925	0.132838	0.891012	3	3	3
P45481	P45481	NA	NA	P45481	#NAME?	0	#NAME?	0	-0.224607	0.97646	0	3	3
P45591	Cfl2	cofilin 2, muscle	12632	P45591	0.350756	0.78904	-0.0653849	0.967538	0.416141	0.925985	3	3	3
P45878	Fkbp2	FK506 binding protein 2	14227	P45878	0.0391151	0.953981	-0.0632598	0.920529	0.102375	0.961316	3	3	3
P45952	Acadm	acyl-Coenzyme A dehydrogenase, medium chain	11364	P45952	-1.39886	0.0139911	-1.5166	0.0143925	0.117739	0.929012	3	3	3
P46061	Rangap1	RAN GTPase activating protein 1	19387	P46061	-0.519127	0.237207	-1.01872	0.0618568	0.499591	0.637444	3	3	3
P46425	Gstp2	glutathione S-transferase, pi 2	14869	P46425	1.44449	0.132757	2.83051	0.0819712	-1.38601	0.638219	3	3	1
P46460	Nsf	N-ethylmaleimide sensitive fusion protein	18195	P46460	0.834617	0.06266	0.683509	0.122203	0.151108	0.902195	3	3	3
P46467	Vps4b	vacuolar protein sorting 4B	20479	P46467	-2.0632	0.372121	-1.8802	0.440104	-0.182996	0.983177	2	3	3
P46471	P46471	NA	NA	P46471	-0.836339	0.135216	-0.804308	0.167353	-0.0320311	0.989186	3	3	3
P46656	Fdx1	ferredoxin 1	14148	P46656	1.0246	0.403962	0.394451	0.76565	0.630146	0.866452	3	2	2
P46664	Adss	adenylosuccinate synthetase, non muscle	11566	P46664	0.656708	0.0711675	0.587823	0.11384	0.068885	0.95743	3	3	3
P46735	Myo1b	myosin IB	17912	P46735	-0.953205	0.0266681	-0.978063	0.0304747	0.0248584	0.985949	3	3	3
P46935	Nedd4	neural precursor cell expressed, developmentally down-regulated 4	17999	P46935	#NAME?	0	#NAME?	0	-0.729441	0.412412	0	3	3
P46938	Yap1	yes-associated protein 1	22601	P46938	-1.86267	0.24785	-1.34068	0.420835	-0.521996	0.910715	2	3	3
P46978	Stt3a	STT3, subunit of the oligosaccharyltransferase complex, homolog A (S. cerevisiae)	16430	P46978	-1.65122	0.481984	-0.196462	0.952265	-1.45476	0.816582	2	3	2
P47199	Cryz	crystallin, zeta	12972	P47199	-2.82421	0.170869	-1.59606	0.421073	-1.22816	0.714496	1	3	3
P47226	P47226	NA	NA	P47226	-1.57581	0.0924142	-1.68721	0.0942616	0.111391	0.97646	3	3	3
P47738	Aldh2	aldehyde dehydrogenase 2, mitochondrial	11669	P47738	1.67565	0.00192105	1.5462	0.00329045	0.129454	0.834582	3	3	3
P47753	P47753	NA	NA	P47753	-1.05733	0.408292	-2.80864	0.0772262	1.75132	0.584517	3	3	3
P47754	Capza2	capping protein (actin filament) muscle Z-line, alpha 2	12343	P47754	0.380186	0.595959	0.0933943	0.914077	0.286791	0.902195	3	3	3
P47757	Capzb	capping protein (actin filament) muscle Z-line, beta	12345	P47757	-1.16977	0.0434555	-1.2671	0.0415339	0.0973251	0.958335	3	3	3
P47758	Srprb	signal recognition particle receptor, B subunit	20818	P47758	-0.950256	0.127651	-0.846175	0.182784	-0.104081	0.96339	3	3	3
P47791	Gsr	glutathione reductase	14782	P47791	-7.71273	0.155563	-4.70878	0.36549	-3.00395	0.721531	1	3	3
P47802	P47802	NA	NA	P47802	1.75155	0.318872	1.87464	0.313588	-0.123094	0.988559	3	3	3
P47809	Map2k4	mitogen-activated protein kinase kinase 4	26398	P47809	#NAME?	0	#NAME?	0	-1.48039	0.672562	0	2	2
P47856	Gfpt1	glutamine fructose-6-phosphate transaminase 1	14583	P47856	-1.19487	0.356039	-0.214962	0.885402	-0.979909	0.755798	3	3	3
P47911	Rpl6	ribosomal protein L6	19988	P47911	-0.946836	0.056171	-1.1557	0.0393454	0.208866	0.855531	3	3	3
P47915	Rpl29	ribosomal protein L29	19944	P47915	-1.35927	0.388289	-0.352657	0.847698	-1.00661	0.805937	3	3	3
P47934	Crat	carnitine acetyltransferase	12908	P47934	#NAME?	0	NA	NA	#NAME?	0	0	3	0
P47941	Crkl	v-crk avian sarcoma virus CT10 oncogene homolog-like	12929	P47941	-0.62945	0.618522	-1.04637	0.479844	0.416915	0.893088	1	3	2
P47955	Rplp1	ribosomal protein, large, P1	56040	P47955	-0.421792	0.899923	0.549865	0.870173	-0.971657	0.866945	1	3	3
P47962	Rpl5	ribosomal protein L5	100503670	P47962	-1.05829	0.104358	-0.914618	0.165424	-0.143675	0.951631	3	3	3
P47963	Rpl13	ribosomal protein L13	270106	P47963	-0.576592	0.102396	-0.532227	0.142821	-0.0443653	0.97646	3	3	3
P47964	P47964	NA	NA	P47964	-1.04669	0.0741783	-0.762029	0.181371	-0.284658	0.831505	3	3	3
P47968	Rpia	ribose 5-phosphate isomerase A	19895	P47968	-2.70434	0.104908	-1.28282	0.40835	-1.42152	0.661654	2	3	3
P48036	Anxa5	annexin A5	11747	P48036	#NAME?	0	#NAME?	0	-0.0452129	0.995566	0	2	3
P48193	Epb41	erythrocyte membrane protein band 4.1	269587	P48193	-3.68472	0.0341989	-2.9774	0.0696257	-0.707322	0.807163	2	3	3
P48428	Tbca	tubulin cofactor A	21371	P48428	0.2475	0.745047	-0.111481	0.897872	0.358981	0.86219	3	3	3
P48678	Lmna	lamin A	16905	P48678	-2.88775	0.00124739	-2.49789	0.00228925	-0.389863	0.64376	3	3	3
P48722	Hspa4l	heat shock protein 4 like	18415	P48722	1.39535	0.379579	1.71036	0.409698	-0.315015	0.954825	1	3	1
P48725	Pcnt	pericentrin (kendrin)	18541	P48725	-2.6437	0.00918222	-2.48006	0.0136663	-0.163643	0.94237	3	3	3
P48758	Cbr1	carbonyl reductase 1	12408	P48758	-0.777767	0.438528	-0.0597647	0.963229	-0.718002	0.777283	3	3	3
P48771	Cox7a2	cytochrome c oxidase subunit 7A2	12866	P48771	-0.720537	0.304178	-0.231162	0.615588	-0.489374	0.741683	2	1	1
P48774	Gstm5	glutathione S-transferase, mu 5	14866	P48774	3.37165	0.134771	1.36858	0.571795	2.00307	0.721531	3	3	2
P48962	Slc25a4	solute carrier family 25 (mitochondrial carrier, adenine nucleotide translocator), member 4	11739	P48962	-0.848933	0.40926	-1.50831	0.188119	0.659376	0.807175	3	3	3
P49025	Cit	citron	12704	P49025	-1.88349	0.112904	-0.457666	0.684421	-1.42582	0.543166	2	3	3
P49135	Ercc3	excision repair cross-complementing rodent repair deficiency, complementation group 3	13872	P49135	-1.72198	0.379599	-0.581315	0.756955	-1.14067	0.760531	1	2	2
P49182	Serpind1	serine (or cysteine) peptidase inhibitor, clade D, member 1	15160	P49182	Inf	0	Inf	0	NA	NA	3	0	0
P49282	Slc11a2	solute carrier family 11 (proton-coupled divalent metal ion transporters), member 2	18174	P49282	-0.432754	0.530915	0.0590774	0.916292	-0.491831	0.765524	1	1	2
P49312	Hnrnpa1	heterogeneous nuclear ribonucleoprotein A1	15382	P49312	0.266046	0.565845	0.254592	0.614231	0.0114544	0.995701	3	3	3
P49443	Ppm1a	protein phosphatase 1A, magnesium dependent, alpha isoform	19042	P49443	0.804988	0.438528	0.567806	0.621449	0.237182	0.956906	3	3	3
P49586	Pcyt1a	phosphate cytidylyltransferase 1, choline, alpha isoform	13026	P49586	-1.3597	0.254258	-1.72235	0.18374	0.362652	0.929012	3	3	3
P49615	Cdk5	cyclin-dependent kinase 5	12568	P49615	1.74486	0.381352	1.03481	0.631814	0.710051	0.91853	3	3	3
P49717	Mcm4	minichromosome maintenance complex component 4	17217	P49717	-0.516953	0.183903	-0.609257	0.149005	0.0923033	0.950423	3	3	3
P49718	P49718	NA	NA	P49718	-0.350159	0.628443	-0.309647	0.694967	-0.0405126	0.989186	3	3	3
P49722	Psma2	proteasome subunit alpha 2	19166	P49722	-0.881213	0.589005	0.102271	0.960776	-0.983484	0.81747	3	3	3
P50096	Impdh1	inosine monophosphate dehydrogenase 1	23917	P50096	-0.76525	0.541017	-1.69925	0.218768	0.934004	0.765524	3	3	3
P50171	H2-Ke6	H2-K region expressed gene 6	14979	P50171	-0.581655	0.672335	-0.603789	0.666911	0.0221337	0.996002	1	2	3
P50247	Gm4737	predicted gene 4737	11615	P50247	-0.385404	0.214683	-0.568137	0.111123	0.182733	0.81747	3	3	3
P50396	Gdi1	guanosine diphosphate (GDP) dissociation inhibitor 1	14567	P50396	-1.11227	0.657178	0.0618039	0.986657	-1.17407	0.866945	1	3	1
P50404	Sftpd	surfactant associated protein D	20390	P50404	Inf	0	Inf	0	NA	NA	3	0	0
P50431	Shmt1	serine hydroxymethyltransferase 1 (soluble)	20425	P50431	-2.57035	0.00943396	-2.27987	0.017234	-0.290485	0.86219	3	3	3
P50446	Krt6a	keratin 6A	16687	P50446	4.16736	0.100484	Inf	0	#NAME?	0	2	1	0
P50516	Atp6v1a	ATPase, H+ transporting, lysosomal V1 subunit A	11964	P50516	-0.200366	0.725679	-0.793745	0.193047	0.593379	0.668067	3	3	3
P50518	Atp6v1e1	ATPase, H+ transporting, lysosomal V1 subunit E1	11973	P50518	-1.30936	0.0690139	0.398797	0.522174	-1.70816	0.240932	2	3	3
P50543	S100a11	S100 calcium binding protein A11	20195	P50543	-2.89671	0.16452	-0.937492	0.650729	-1.95922	0.646284	2	3	3
P50544	Acadvl	acyl-Coenzyme A dehydrogenase, very long chain	11370	P50544	-1.56314	0.361222	-1.08999	0.546785	-0.473154	0.939228	3	3	3
P50580	Pa2g4	proliferation-associated 2G4	18813	P50580	-0.208411	0.672018	-0.906218	0.114581	0.697807	0.56593	3	3	3
P51125	Cast	calpastatin	12380	P51125	#NAME?	0	#NAME?	0	-0.493104	0.918912	0	3	3
P51150	Rab7	RAB7, member RAS oncogene family	19349	P51150	-1.48156	0.106557	-1.44008	0.132271	-0.0414774	0.989842	3	3	3
P51174	Acadl	acyl-Coenzyme A dehydrogenase, long-chain	11363	P51174	-0.8743	0.238356	-1.16868	0.153599	0.294376	0.900905	3	3	3
P51410	Rpl9	ribosomal protein L9	20005	P51410	-0.441576	0.507751	-0.552054	0.442603	0.110478	0.972431	3	3	3
P51432	Plcb3	phospholipase C, beta 3	18797	P51432	#NAME?	0	#NAME?	0	-1.72759	0.860022	0	3	1
P51569	P51569	NA	NA	P51569	-1.51195	0.0265183	-3.42584	0.00425462	1.91389	0.207564	2	3	3
P51660	Hsd17b4	hydroxysteroid (17-beta) dehydrogenase 4	15488	P51660	1.54183	0.0384423	0.95789	0.149627	0.583942	0.688053	3	3	3
P51855	Gss	glutathione synthetase	14854	P51855	-1.23046	0.438202	-1.78486	0.302911	0.554402	0.923001	3	3	3
P51859	Hdgf	heparin binding growth factor	15191	P51859	-1.03663	0.0289462	-0.984505	0.0406312	-0.0521287	0.97646	3	3	3
P51863	Atp6v0d1	ATPase, H+ transporting, lysosomal V0 subunit D1	11972	P51863	-0.431393	0.595959	0.101906	0.916292	-0.533299	0.797548	3	3	3
P51879	Ocm	oncomodulin	18261	P51879	#NAME?	0	#NAME?	0	0.064388	0.992222	0	1	2
P51881	Slc25a5	solute carrier family 25 (mitochondrial carrier, adenine nucleotide translocator), member 5	11740	P51881	0.214123	0.632056	-0.406555	0.396664	0.620678	0.576641	3	3	3
P51906	Slc1a1	solute carrier family 1 (neuronal/epithelial high affinity glutamate transporter, system Xag), member 1	20510	P51906	#NAME?	0	#NAME?	0	-0.000237908	0.999867	0	3	2
P51949	Mnat1	menage a trois 1	17420	P51949	-2.49291	0.0513593	-1.77449	0.132271	-0.718419	0.740446	2	3	3
P52293	Kpna2	karyopherin (importin) alpha 2	16647	P52293	1.2185	0.00872199	1.52925	0.00534521	-0.310748	0.641035	3	3	3
P52431	Pold1	polymerase (DNA directed), delta 1, catalytic subunit	18971	P52431	-0.842957	0.151482	-2.15114	0.0205017	1.30818	0.322867	2	3	3
P52432	Polr1c	polymerase (RNA) I polypeptide C	20016	P52432	-0.195093	0.83508	0.202049	0.842099	-0.397142	0.855531	2	3	3
P52479	Usp10	ubiquitin specific peptidase 10	22224	P52479	0.929333	0.320548	0.623165	0.527271	0.306168	0.925985	3	3	3
P52480	Pkm	pyruvate kinase, muscle	18746	P52480	2.30327	0.00469857	1.65401	0.0146298	0.649258	0.525456	3	3	3
P52482	Ube2e1	ubiquitin-conjugating enzyme E2E 1	22194	P52482	1.05043	0.424103	-0.753641	0.636726	1.80407	0.629996	3	3	2
P52503	Ndufs6	NADH:ubiquinone oxidoreductase core subunit S6	407785	P52503	-0.897631	0.277856	-0.302982	0.730273	-0.594649	0.739563	2	3	3
P52624	Upp1	uridine phosphorylase 1	22271	P52624	0.108408	0.905635	-0.559172	0.493393	0.66758	0.722675	3	3	3
P52760	Rida	reactive intermediate imine deaminase A homolog	15473	P52760	-0.0885313	0.97567	1.23799	0.582117	-1.32652	0.844964	2	1	2
P52800	Efnb2	ephrin B2	13642	P52800	#NAME?	0	#NAME?	0	-2.32762	0.637444	0	3	3
P52825	Cpt2	carnitine palmitoyltransferase 2	12896	P52825	1.35662	0.210444	2.89478	0.0406312	-1.53816	0.554496	3	3	3
P52927	Hmga2	high mobility group AT-hook 2	15364	P52927	0.0458089	0.950859	-0.120411	0.86328	0.16622	0.936335	3	3	3
P53026	P53026	NA	NA	P53026	-0.0312307	0.97421	-0.460461	0.542897	0.429231	0.81747	3	3	3
P53395	Dbt	dihydrolipoamide branched chain transacylase E2	13171	P53395	-0.973161	0.214784	-1.10871	0.187636	0.135551	0.965113	3	3	3
P53569	Cebpz	CCAAT/enhancer binding protein zeta	12607	P53569	#NAME?	0	#NAME?	0	-1.26673	0.728988	0	3	3
P53702	Hccs	holocytochrome c synthetase	15159	P53702	#NAME?	0	#NAME?	0	-0.256957	0.977657	0	3	1
P53762	Arnt	aryl hydrocarbon receptor nuclear translocator	11863	P53762	NA	NA	#NAME?	0	Inf	0	0	0	3
P53810	Pitpna	phosphatidylinositol transfer protein, alpha	18738	P53810	-1.57542	0.291056	-1.24551	0.376822	-0.329907	0.955843	3	2	3
P53811	Pitpnb	phosphatidylinositol transfer protein, beta	56305	P53811	-0.406943	0.783725	-1.82192	0.247092	1.41498	0.661654	2	3	3
P53986	Slc16a1	solute carrier family 16 (monocarboxylic acid transporters), member 1	20501	P53986	#NAME?	0	#NAME?	0	1.06456	0.707521	0	3	3
P53994	Rab2a	RAB2A, member RAS oncogene family	59021	P53994	2.40507	0.119586	2.14346	0.174809	0.261612	0.962129	3	3	3
P53995	Anapc1	anaphase promoting complex subunit 1	17222	P53995	-2.08348	0.117074	-1.30603	0.287193	-0.77745	0.690167	1	3	3
P53996	Cnbp	cellular nucleic acid binding protein	12785	P53996	-1.58763	0.0727413	-0.600299	0.462702	-0.987328	0.610505	3	3	3
P54071	Idh2	isocitrate dehydrogenase 2 (NADP+), mitochondrial	269951	P54071	-1.34975	0.132872	-1.79542	0.0786073	0.445671	0.839336	3	3	3
P54103	Dnajc2	DnaJ heat shock protein family (Hsp40) member C2	22791	P54103	-3.63675	0.00470521	-3.49145	0.0059359	-0.145304	0.956906	3	3	3
P54227	Stmn1	stathmin 1	16765	P54227	#NAME?	0	#NAME?	0	-0.216896	0.885674	0	3	2
P54276	Msh6	mutS homolog 6	17688	P54276	-0.769929	0.195222	-1.03362	0.120187	0.263691	0.871674	3	3	3
P54279	P54279	NA	NA	P54279	-0.323824	0.666526	-0.117755	0.910302	-0.20607	0.936028	1	3	1
P54726	Rad23a	RAD23 homolog A, nucleotide excision repair protein	19358	P54726	#NAME?	0	NA	NA	#NAME?	0	0	3	0
P54728	Rad23b	RAD23 homolog B, nucleotide excision repair protein	19359	P54728	-0.385339	0.384441	-0.76764	0.132271	0.382302	0.724041	3	3	3
P54729	Nub1	negative regulator of ubiquitin-like proteins 1	53312	P54729	-0.14094	0.935629	0.276115	0.870173	-0.417055	0.932664	3	3	3
P54731	Faf1	Fas-associated factor 1	14084	P54731	-2.30142	0.0184264	-1.70502	0.053238	-0.596399	0.721531	3	3	3
P54754	Ephb3	Eph receptor B3	13845	P54754	-1.76023	0.376186	-0.106313	0.964962	-1.65391	0.638392	1	3	3
P54775	Psmc4	proteasome (prosome, macropain) 26S subunit, ATPase, 4	23996	P54775	-1.64304	0.0494721	-0.788797	0.281344	-0.854244	0.611814	3	3	3
P54822	Adsl	adenylosuccinate lyase	11564	P54822	1.60683	0.245211	2.24762	0.117371	-0.640796	0.860167	3	1	2
P54823	Ddx6	DEAD (Asp-Glu-Ala-Asp) box polypeptide 6	13209	P54823	-1.09536	0.105227	-0.757117	0.247092	-0.338243	0.831605	3	3	3
P54923	Adprh	ADP-ribosylarginine hydrolase	11544	P54923	-1.4579	0.0520083	-1.07796	0.130704	-0.379939	0.816092	3	3	3
P55012	Slc12a2	solute carrier family 12, member 2	20496	P55012	#NAME?	0	#NAME?	0	-0.806723	0.740446	0	3	1
P55096	Abcd3	ATP-binding cassette, sub-family D (ALD), member 3	19299	P55096	Inf	0	Inf	0	NA	NA	3	0	0
P55194	Sh3bp1	SH3-domain binding protein 1	20401	P55194	#NAME?	0	#NAME?	0	-0.579084	0.843908	0	3	3
P55258	Rab8a	RAB8A, member RAS oncogene family	17274	P55258	-0.477934	0.711788	-1.36171	0.376822	0.883773	0.810702	3	3	2
P55264	Adk	adenosine kinase	11534	P55264	0.410396	0.688838	0.992439	0.357825	-0.582043	0.821858	3	3	3
P55292	Dsc2	desmocollin 2	13506	P55292	#NAME?	0	#NAME?	0	-0.82898	0.755798	0	3	3
P55302	Lrpap1	low density lipoprotein receptor-related protein associated protein 1	16976	P55302	-1.39226	0.131072	-0.601926	0.503201	-0.790335	0.712236	3	3	3
P55772	Entpd1	ectonucleoside triphosphate diphosphohydrolase 1	12495	P55772	#NAME?	0	NA	NA	#NAME?	0	0	3	0
P55937	Golga3	golgi autoantigen, golgin subfamily a, 3	269682	P55937	#NAME?	0	#NAME?	0	-2.17113	0.329637	0	2	2
P56135	Atp5j2	ATP synthase, H+ transporting, mitochondrial F0 complex, subunit F2	57423	P56135	#NAME?	0	#NAME?	0	-1.8994	0.227365	0	3	3
P56183	Rrp1	ribosomal RNA processing 1	18114	P56183	0.0493482	0.954959	-0.226922	0.765399	0.27627	0.901842	3	3	3
P56212	Arpp19	cAMP-regulated phosphoprotein 19	59046	P56212	-1.78034	0.0496893	-1.52437	0.0665603	-0.255968	0.91412	3	2	3
P56213	Gfer	growth factor, augmenter of liver regeneration	11692	P56213	-0.131887	0.841299	-0.334656	0.571417	0.202769	0.925985	3	2	3
P56371	Rab4a	RAB4A, member RAS oncogene family	19341	P56371	-1.26814	0.175163	-0.46865	0.575459	-0.799494	0.718522	3	2	3
P56376	Acyp1	acylphosphatase 1, erythrocyte (common) type	66204	P56376	1.47948	0.0517786	1.29335	0.0892692	0.186127	0.931964	3	3	3
P56379	Atp5mpl	ATP synthase membrane subunit 6.8PL	70257	P56379	#NAME?	0	#NAME?	0	1.01185	0.913588	0	2	1
P56382	Atp5e	ATP synthase, H+ transporting, mitochondrial F1 complex, epsilon subunit	67126	P56382	0.230441	0.782742	-1.22288	0.171888	1.45332	0.468087	3	3	3
P56383	Atp5g2	ATP synthase, H+ transporting, mitochondrial F0 complex, subunit C2 (subunit 9)	67942	P56383	-0.133167	0.901171	-0.394197	0.693517	0.261029	0.935591	3	3	3
P56390	Cks2	CDC28 protein kinase regulatory subunit 2	66197	P56390	Inf	0	1.2226	0.299282	Inf	0	2	0	2
P56391	Cox6b1	cytochrome c oxidase, subunit 6B1	110323	P56391	-0.977938	0.0908174	-0.456556	0.406325	-0.521381	0.687467	3	3	3
P56394	Cox17	cytochrome c oxidase assembly protein 17, copper chaperone	12856	P56394	-2.07277	0.138735	-1.8716	0.191587	-0.201167	0.974739	3	3	3
P56395	Cyb5a	cytochrome b5 type A (microsomal)	109672	P56395	2.0706	0.0949376	2.19058	0.0994472	-0.119981	0.981316	3	3	3
P56399	Usp5	ubiquitin specific peptidase 5 (isopeptidase T)	22225	P56399	-0.0434043	0.973513	-0.894819	0.388418	0.851415	0.721531	3	3	3
P56480	Atp5b	ATP synthase, H+ transporting mitochondrial F1 complex, beta subunit	11947	P56480	-0.402302	0.0225294	-0.412517	0.0261648	0.010215	0.985949	3	3	3
P56542	Dnase2a	deoxyribonuclease II alpha	13423	P56542	#NAME?	0	#NAME?	0	-0.687707	0.908317	0	1	2
P56546	Ctbp2	C-terminal binding protein 2	13017	P56546	-2.16203	0.0809465	-2.41849	0.0740729	0.256459	0.954604	3	3	3
P56567	Csta1	cystatin A1	209294	P56567	#NAME?	0	#NAME?	0	0.696222	0.860532	0	3	3
P56677	St14	suppression of tumorigenicity 14 (colon carcinoma)	19143	P56677	-4.86679	0.0106774	-4.64356	0.0155804	-0.223232	0.952873	2	3	3
P56812	Pdcd5	programmed cell death 5	56330	P56812	-0.77274	0.349102	-0.591427	0.493393	-0.181312	0.956906	3	3	3
P56841	Tcl1b2	T cell leukemia/lymphoma 1B, 2	27381	P56841	-0.268424	0.942039	Inf	0	#NAME?	0	2	1	0
P56873	Znrd2	zinc ribbon domain containing 2	56390	P56873	1.22671	0.129452	0.182029	0.807136	1.04469	0.427141	1	3	3
P56959	Fus	fused in sarcoma	233908	P56959	0.145615	0.75485	-0.661588	0.18387	0.807203	0.482366	3	3	3
P56960	Exosc10	exosome component 10	50912	P56960	-2.22698	0.0427702	-1.78535	0.0892692	-0.44163	0.81747	2	3	3
P57016	Lad1	ladinin	16763	P57016	#NAME?	0	#NAME?	0	-1.31773	0.475562	0	3	3
P57716	Ncstn	nicastrin	59287	P57716	-1.83988	0.437699	-2.1001	0.456282	0.260218	0.980902	2	3	2
P57746	Atp6v1d	ATPase, H+ transporting, lysosomal V1 subunit D	73834	P57746	-0.659106	0.954959	-7.06901	0.437305	6.40991	0.781255	3	2	3
P57759	Erp29	endoplasmic reticulum protein 29	67397	P57759	-1.72446	0.00780162	-1.65696	0.00913672	-0.0675034	0.961734	3	3	3
P57776	Eef1d	eukaryotic translation elongation factor 1 delta (guanine nucleotide exchange protein)	66656	P57776	-0.0354497	0.880042	-0.132939	0.545616	0.0974891	0.866945	3	3	3
P57780	Actn4	actinin alpha 4	60595	P57780	-0.915486	0.0151458	-0.955248	0.018438	0.0397616	0.974268	3	3	3
P57784	Snrpa1	small nuclear ribonucleoprotein polypeptide A'	68981	P57784	-1.90918	0.0209088	-0.791198	0.217072	-1.11798	0.436368	3	3	3
P58006	Sesn1	sestrin 1	140742	P58006	Inf	0	Inf	0	NA	NA	3	0	0
P58021	Tm9sf2	transmembrane 9 superfamily member 2	68059	P58021	1.14695	0.335661	3.91251	0.0244171	-2.76556	0.352122	3	3	3
P58058	Nadk	NAD kinase	192185	P58058	#NAME?	0	NA	NA	#NAME?	0	0	3	0
P58059	Mrps21	mitochondrial ribosomal protein S21	66292	P58059	#NAME?	0	#NAME?	0	0.307909	0.984271	0	1	2
P58137	Acot8	acyl-CoA thioesterase 8	170789	P58137	0.812185	0.592132	1.2688	0.436715	-0.456617	0.930686	3	3	3
P58252	Eef2	eukaryotic translation elongation factor 2	13629	P58252	0.352004	0.297547	-0.199273	0.579181	0.551277	0.510495	3	3	3
P58281	Opa1	OPA1, mitochondrial dynamin like GTPase	74143	P58281	-1.25321	0.213912	-0.596183	0.57001	-0.65703	0.785143	3	3	3
P58334	Klf16	Kruppel-like factor 16	118445	P58334	0.253156	0.936938	-0.430652	0.872957	0.683808	0.932961	1	1	2
P58404	Strn4	striatin, calmodulin binding protein 4	97387	P58404	-3.54758	0.0366742	-2.12674	0.125687	-1.42084	0.504346	1	3	3
P58468	Fam207a	family with sequence similarity 207, member A	108707	P58468	-0.297356	0.876466	-0.510576	0.78558	0.21322	0.97646	2	3	3
P58544	Btbd1	BTB (POZ) domain containing 1	83962	P58544	-1.48017	0.0564968	-0.723403	0.225048	-0.756765	0.501978	1	3	2
P58710	Gulo	gulonolactone (L-) oxidase	268756	P58710	0.255844	0.600361	0.918918	0.114116	-0.663074	0.584517	3	3	3
P58742	Aaas	achalasia, adrenocortical insufficiency, alacrimia	223921	P58742	0.680331	0.677205	-0.955223	0.584161	1.63555	0.687467	3	3	3
P58771	Tpm1	tropomyosin 1, alpha	22003	P58771	-1.70259	0.274092	-1.17195	0.471907	-0.53064	0.922237	3	3	3
P58774	Tpm2	tropomyosin 2, beta	22004	P58774	-1.52186	0.559444	0.265974	0.928496	-1.78784	0.802812	1	2	1
P58871	Tnks1bp1	tankyrase 1 binding protein 1	228140	P58871	-4.88868	0.0198253	-3.59398	0.057657	-1.2947	0.721531	3	3	3
P58929	Gmeb2	glucocorticoid modulatory element binding protein 2	229004	P58929	-1.48557	0.116275	-2.27078	0.105273	0.785214	0.684914	2	2	1
P59017	Bcl2l13	BCL2-like 13 (apoptosis facilitator)	94044	P59017	0.0948707	0.92404	0.622919	0.527721	-0.528048	0.810691	2	3	2
P59110	Senp1	SUMO1/sentrin specific peptidase 1	223870	P59110	#NAME?	0	#NAME?	0	0.120691	0.979586	0	2	1
P59235	Nup43	nucleoporin 43	69912	P59235	-0.762317	0.20267	0.47395	0.440064	-1.23627	0.401233	3	3	3
P59242	P59242	NA	NA	P59242	-3.16834	0.0072472	-2.00867	0.0292594	-1.15967	0.483751	3	3	3
P59325	Eif5	eukaryotic translation initiation factor 5	217869	P59325	-0.605378	0.150049	-1.02045	0.0484553	0.415075	0.669485	3	3	3
P59328	Wdhd1	WD repeat and HMG-box DNA binding protein 1	218973	P59328	-3.13249	0.0520493	-2.81064	0.0823344	-0.321857	0.932664	2	3	3
P59383	Lrrn4	leucine rich repeat neuronal 4	320974	P59383	-2.57315	0.187584	-0.0758633	0.973312	-2.49729	0.522267	1	3	2
P59470	Polr3b	polymerase (RNA) III (DNA directed) polypeptide B	70428	P59470	-1.9138	0.407014	-0.942984	0.702447	-0.970814	0.81747	1	3	3
P59708	Sf3b6	splicing factor 3B, subunit 6	66055	P59708	-1.4116	0.131605	-1.21688	0.198479	-0.19472	0.956906	3	3	3
P59999	Arpc4	actin related protein 2/3 complex, subunit 4	68089	P59999	-0.816705	0.418366	-1.27194	0.246241	0.455236	0.875243	3	3	3
P60122	Ruvbl1	RuvB-like protein 1	56505	P60122	0.343236	0.433214	0.459803	0.332104	-0.116567	0.944301	3	3	3
P60229	Eif3e	eukaryotic translation initiation factor 3, subunit E	16341	P60229	-0.032928	0.954959	0.523787	0.291581	-0.556715	0.629996	3	3	3
P60330	Espl1	extra spindle pole bodies 1, separase	105988	P60330	#NAME?	0	#NAME?	0	-0.28341	0.923001	0	2	3
P60335	Pcbp1	poly(rC) binding protein 1	23983	P60335	-0.819363	0.227706	-1.35775	0.0909071	0.538389	0.740446	3	3	3
P60487	Pdxp	pyridoxal (pyridoxine, vitamin B6) phosphatase	57028	P60487	-1.22518	0.272921	0.329546	0.805889	-1.55472	0.610566	3	3	2
P60521	Gabarapl2	gamma-aminobutyric acid (GABA) A receptor-associated protein-like 2	93739	P60521	1.21124	0.179712	0.151663	0.880281	1.05958	0.623204	3	3	3
P60670	Nploc4	NPL4 homolog, ubiquitin recognition factor	217365	P60670	-0.348876	0.374587	-0.694126	0.125594	0.34525	0.721531	3	3	3
P60710	Actb	actin, beta	11461	P60710	-1.37512	0.146457	-1.86552	0.085686	0.490402	0.831605	3	3	3
P60762	Morf4l1	mortality factor 4 like 1	21761	P60762	-2.23924	0.600303	-3.73399	0.426571	1.49475	0.860532	1	3	3
P60766	Cdc42	cell division cycle 42	12540	P60766	-1.663	0.183744	-1.26444	0.321616	-0.39856	0.925985	3	3	3
P60824	Cirbp	cold inducible RNA binding protein	12696	P60824	#NAME?	0	#NAME?	0	-0.78106	0.860399	0	3	3
P60840	Ensa	endosulfine alpha	56205	P60840	-1.49815	0.70126	-3.70691	0.421073	2.20876	0.788069	1	2	2
P60843	Eif4a1	eukaryotic translation initiation factor 4A1	13681	P60843	-0.160678	0.667508	-0.492258	0.220866	0.33158	0.721531	3	3	3
P60867	Rps20	ribosomal protein S20	67427	P60867	-0.381548	0.135193	-0.922948	0.0159325	0.5414	0.358559	3	3	3
P60904	Dnajc5	DnaJ heat shock protein family (Hsp40) member C5	13002	P60904	0.863861	NA	0.266254	NA	0.597607	NA	1	1	1
P61021	Rab5b	RAB5B, member RAS oncogene family	19344	P61021	-1.29687	0.25075	0.678747	0.567605	-1.97562	0.484167	3	3	3
P61022	Chp1	calcineurin-like EF hand protein 1	56398	P61022	-0.560035	0.563636	-0.672149	0.519294	0.112115	0.982129	3	2	2
P61025	Cks1b	CDC28 protein kinase 1b	54124	P61025	1.91308	0.317113	2.96129	0.214401	-1.04821	0.845266	3	1	1
P61027	Rab10	RAB10, member RAS oncogene family	19325	P61027	-1.50024	0.221845	0.915305	0.463931	-2.41555	0.390527	2	3	3
P61079	Ube2d3	ubiquitin-conjugating enzyme E2D 3	66105	P61079	4.71945	0.0171419	3.13987	0.0665603	1.57958	0.638219	3	3	3
P61082	Ube2m	ubiquitin-conjugating enzyme E2M	22192	P61082	-0.146111	0.804615	-0.784958	0.203749	0.638847	0.645025	3	3	3
P61087	Ube2k	ubiquitin-conjugating enzyme E2K	53323	P61087	1.89004	0.0521725	2.14419	0.0444465	-0.254152	0.929012	3	3	3
P61089	Ube2n	ubiquitin-conjugating enzyme E2N	93765	P61089	1.28793	0.236939	0.0208187	0.987533	1.26711	0.629996	3	3	3
P61161	Actr2	ARP2 actin-related protein 2	66713	P61161	-1.28084	0.0919133	-1.08654	0.155068	-0.194305	0.932664	3	3	3
P61164	Actr1a	ARP1 actin-related protein 1A, centractin alpha	54130	P61164	-1.14007	0.274092	-0.792533	0.456493	-0.347534	0.860022	1	3	3
P61166	Tmem258	transmembrane protein 258	69038	P61166	1.75082	0.280114	-0.522757	0.711233	2.27358	0.643691	3	1	1
P61202	Cops2	COP9 signalosome subunit 2	12848	P61202	1.14398	0.407535	1.37221	0.357825	-0.228233	0.972431	3	3	3
P61205	Arf3	ADP-ribosylation factor 3	11842	P61205	-0.345698	0.739241	-1.08417	0.314321	0.738468	0.765524	3	3	3
P61211	Arl1	ADP-ribosylation factor-like 1	104303	P61211	1.03167	0.526355	Inf	0	#NAME?	0	3	2	0
P61222	Abce1	ATP-binding cassette, sub-family E (OABP), member 1	24015	P61222	-0.843036	0.04727	-0.94979	0.0410609	0.106755	0.929012	3	3	3
P61226	Rap2b	RAP2B, member of RAS oncogene family	74012	P61226	-0.866237	0.528767	-0.473025	0.754423	-0.393212	0.901842	1	3	3
P61255	Rpl26	ribosomal protein L26	19941	P61255	-2.05337	0.0942397	-1.53686	0.199667	-0.516513	0.866945	3	3	3
P61290	Psme3	proteaseome (prosome, macropain) activator subunit 3 (PA28 gamma, Ki)	19192	P61290	-1.50024	0.327793	-2.54265	0.144025	1.04241	0.780086	3	3	3
P61327	Magoh	mago homolog, exon junction complex core component	17149	P61327	#NAME?	0	#NAME?	0	-1.069	0.810691	0	3	2
P61358	Rpl27	ribosomal protein L27	19942	P61358	-0.440153	0.311103	-0.446253	0.329837	0.00610027	0.997225	3	3	3
P61514	Rpl37a	ribosomal protein L37a	19981	P61514	-1.5734	0.0368913	-2.71673	0.00913672	1.14334	0.427141	3	3	3
P61620	Sec61a1	Sec61 alpha 1 subunit (S. cerevisiae)	53421	P61620	0.336851	0.731555	1.37622	0.217178	-1.03937	0.698873	3	2	2
P61750	Arf4	ADP-ribosylation factor 4	11843	P61750	-1.68155	0.369579	-2.0558	0.3065	0.374248	0.955843	2	3	3
P61759	Vbp1	von Hippel-Lindau binding protein 1	22327	P61759	-1.14219	0.0150024	-2.29874	0.00320808	1.15654	0.207564	2	3	3
P61804	Dad1	defender against cell death 1	13135	P61804	1.39527	0.312222	0.283869	0.866667	1.1114	0.737904	2	3	2
P61924	Copz1	coatomer protein complex, subunit zeta 1	56447	P61924	-0.368077	0.407746	-0.296207	0.534827	-0.0718694	0.972513	3	3	3
P61957	Sumo2	small ubiquitin-like modifier 2	170930	P61957	-3.17552	0.400487	-6.24513	0.156241	3.06961	0.720489	2	3	3
P61961	Ufm1	ubiquitin-fold modifier 1	67890	P61961	0.665721	0.831057	-0.546847	0.871086	1.21257	0.821789	1	3	3
P61963	Dcaf7	DDB1 and CUL4 associated factor 7	71833	P61963	#NAME?	0	NA	NA	#NAME?	0	0	3	0
P61965	Wdr5	WD repeat domain 5	140858	P61965	0.313665	0.795864	0.409218	0.751365	-0.0955535	0.985751	3	3	3
P61967	Ap1s1	adaptor protein complex AP-1, sigma 1	11769	P61967	-1.34371	0.164176	0.160636	0.866661	-1.50435	0.436368	1	3	2
P61971	Nutf2	nuclear transport factor 2	68051	P61971	-0.195458	0.872342	-0.957965	0.408754	0.762507	0.776139	3	3	3
P61979	Hnrnpk	heterogeneous nuclear ribonucleoprotein K	15387	P61979	-0.654281	0.0209159	-0.87108	0.0114559	0.2168	0.668067	3	3	3
P61982	Ywhag	tyrosine 3-monooxygenase/tryptophan 5-monooxygenase activation protein, gamma polypeptide	22628	P61982	1.34495	0.0494687	0.323771	0.592036	1.02118	0.464353	3	3	3
P62071	Rras2	related RAS viral (r-ras) oncogene 2	66922	P62071	-1.90073	0.174015	0.112181	0.94706	-2.01291	0.538912	3	3	3
P62073	Timm10	translocase of inner mitochondrial membrane 10	30059	P62073	-2.2925	0.0370993	-0.912848	0.321616	-1.37965	0.522267	3	3	3
P62075	Timm13	translocase of inner mitochondrial membrane 13	30055	P62075	-0.763679	0.379579	-0.880385	0.342027	0.116706	0.97646	3	3	3
P62077	Timm8b	translocase of inner mitochondrial membrane 8B	30057	P62077	#NAME?	0	#NAME?	0	-0.132472	0.96186	0	3	3
P62082	Rps7	ribosomal protein S7	20115	P62082	0.413437	0.206857	-0.470451	0.181439	0.883888	0.263929	3	3	3
P62137	Ppp1ca	protein phosphatase 1 catalytic subunit alpha	19045	P62137	-0.728794	0.430391	-1.08892	0.279515	0.360124	0.908317	3	3	3
P62141	Ppp1cb	protein phosphatase 1 catalytic subunit beta	19046	P62141	-0.374216	0.817588	-1.20153	0.436715	0.827311	0.820911	2	2	3
P62192	Psmc1	protease (prosome, macropain) 26S subunit, ATPase 1	19179	P62192	-0.379445	0.497807	-0.252863	0.682287	-0.126582	0.956906	3	3	3
P62196	Psmc5	protease (prosome, macropain) 26S subunit, ATPase 5	19184	P62196	-0.113332	0.813156	-0.445537	0.363493	0.332205	0.767647	3	3	3
P62242	Rps8	ribosomal protein S8	20116	P62242	-0.510602	0.234786	-0.59021	0.198717	0.0796079	0.961316	3	3	3
P62245	Rps15a	ribosomal protein S15A	267019	P62245	0.134525	0.87276	-0.39509	0.628049	0.529615	0.776139	3	3	3
P62259	Ywhae	tyrosine 3-monooxygenase/tryptophan 5-monooxygenase activation protein, epsilon polypeptide	22627	P62259	0.015493	0.975071	-0.251449	0.539142	0.266942	0.778902	3	3	3
P62264	Rps14	ribosomal protein S14	20044	P62264	-1.01277	0.021604	-0.993294	0.0279654	-0.0194767	0.989186	3	3	3
P62267	Rps23	ribosomal protein S23	66475	P62267	-2.39328	0.191207	-1.93211	0.304987	-0.461176	0.944301	3	3	3
P62270	Rps18	ribosomal protein S18	20084	P62270	1.01684	0.170869	0.803905	0.288141	0.212938	0.930119	3	3	3
P62274	Rps29	ribosomal protein S29	20090	P62274	-0.277852	0.738757	-0.860528	0.31936	0.582676	0.767826	3	3	3
P62281	Rps11	ribosomal protein S11	27207	P62281	-0.585951	0.22171	-0.561933	0.261317	-0.024018	0.989842	3	3	3
P62301	Rps13	ribosomal protein S13	68052	P62301	-0.168464	0.845455	-0.628784	0.456493	0.460319	0.821858	3	3	3
P62305	Snrpe	small nuclear ribonucleoprotein E	20643	P62305	0.0615477	0.988476	-0.217648	0.95709	0.279196	0.984529	1	1	2
P62307	Snrpf	small nuclear ribonucleoprotein polypeptide F	69878	P62307	-0.131028	0.948326	-1.21569	0.477426	1.08466	0.781255	3	3	3
P62311	Lsm3	LSM3 homolog, U6 small nuclear RNA and mRNA degradation associated	67678	P62311	-0.209578	0.799471	0.725194	0.401026	-0.934771	0.610509	2	3	3
P62313	Lsm6	LSM6 homolog, U6 small nuclear RNA and mRNA degradation associated	78651	P62313	1.62606	0.201763	1.45536	0.26925	0.170692	0.97646	3	3	3
P62315	Snrpd1	small nuclear ribonucleoprotein D1	20641	P62315	1.07138	0.144555	-1.58174	0.0961558	2.65311	0.227365	2	3	2
P62317	Snrpd2	small nuclear ribonucleoprotein D2	107686	P62317	-1.26668	0.0116579	-1.69415	0.0059359	0.427471	0.588092	3	3	3
P62320	Snrpd3	small nuclear ribonucleoprotein D3	67332	P62320	-0.864606	0.161396	-0.932982	0.155989	0.0683764	0.978601	3	3	3
P62334	Psmc6	proteasome (prosome, macropain) 26S subunit, ATPase, 6	67089	P62334	0.0194202	0.979258	-0.042114	0.95709	0.0615342	0.982377	3	3	3
P62488	Polr2g	polymerase (RNA) II (DNA directed) polypeptide G	67710	P62488	2.19778	0.114685	Inf	0	#NAME?	0	3	3	0
P62500	Tsc22d1	TSC22 domain family, member 1	21807	P62500	3.01239	0.00379383	1.21104	0.0591497	1.80135	0.224074	3	3	3
P62627	Dynlrb1	dynein light chain roadblock-type 1	67068	P62627	-2.98411	0.00459068	-2.80899	0.00586111	-0.17512	0.875243	2	3	3
P62702	Rps4x	ribosomal protein S4, X-linked	20102	P62702	0.903508	0.137459	0.590005	0.328526	0.313503	0.831605	3	3	3
P62717	Rpl18a	ribosomal protein L18A	76808	P62717	-0.0196953	0.983255	0.466402	0.600524	-0.486097	0.820098	3	3	3
P62743	Ap2s1	adaptor-related protein complex 2, sigma 1 subunit	232910	P62743	-2.76235	0.136764	-1.16069	0.526449	-1.60166	0.714359	3	3	3
P62748	Hpcal1	hippocalcin-like 1	53602	P62748	#NAME?	0	#NAME?	0	-2.78377	0.522267	0	3	3
P62751	Rpl23a	ribosomal protein L23A	268449	P62751	-0.473715	0.351541	-0.317894	0.552614	-0.155821	0.929012	3	3	3
P62754	Rps6	ribosomal protein S6	20104	P62754	-0.81757	0.132757	-0.558587	0.299282	-0.258983	0.851134	3	3	3
P62774	Mtpn	myotrophin	14489	P62774	-1.74598	0.16452	-1.56065	0.226084	-0.185336	0.974268	3	3	3
P62806	H4c8	H4 clustered histone 8	69386	P62806	1.3959	0.200169	0.34976	0.762947	1.04614	0.688053	3	3	3
P62814	Atp6v1b2	ATPase, H+ transporting, lysosomal V1 subunit B2	11966	P62814	0.0539473	0.918827	-0.237427	0.618835	0.291374	0.791011	3	3	3
P62821	Rab1a	RAB1A, member RAS oncogene family	19324	P62821	0.269805	0.860776	1.4309	0.333364	-1.1611	0.73307	3	3	3
P62827	Ran	RAN, member RAS oncogene family	19384	P62827	0.964462	0.0643762	0.05731	0.914077	0.907152	0.412412	3	3	3
P62830	Rpl23	ribosomal protein L23	65019	P62830	-2.26053	0.00789383	-0.587064	0.253878	-1.67347	0.224074	3	3	3
P62835	Rap1a	RAS-related protein 1a	109905	P62835	-1.5579	0.00955693	-1.02063	0.03937	-0.537271	0.554496	3	3	3
P62843	Rps15	ribosomal protein S15	20054	P62843	-1.60884	0.128405	-1.31797	0.213244	-0.290878	0.930686	3	3	3
P62849	Rps24	ribosomal protein S24	20088	P62849	-1.06239	0.0707189	-0.692109	0.211679	-0.370277	0.767414	3	3	3
P62852	Rps25	ribosomal protein S25	75617	P62852	-0.176185	0.789237	0.487676	0.467072	-0.66386	0.669485	3	3	3
P62855	Rps26	ribosomal protein S26	27370	P62855	1.11542	0.0445398	0.681692	0.174404	0.433725	0.694252	3	3	3
P62858	Rps28	ribosomal protein S28	54127	P62858	0.445699	0.3923	-0.598765	0.282356	1.04446	0.412412	3	3	3
P62862	P62862	NA	NA	P62862	-2.94029	0.0300762	-2.84128	0.0395442	-0.0990026	0.978601	2	3	3
P62869	Elob	elongin B	67673	P62869	-0.186022	0.601667	-0.356631	0.354774	0.170609	0.866945	3	3	3
P62874	Gnb1	guanine nucleotide binding protein (G protein), beta 1	14688	P62874	-2.13862	0.00871588	-1.72885	0.0197364	-0.409775	0.724864	3	3	3
P62876	Polr2l	polymerase (RNA) II (DNA directed) polypeptide L	66491	P62876	0.723558	0.210444	0.11742	0.855148	0.606138	0.626382	2	3	3
P62878	Rbx1	ring-box 1	56438	P62878	1.7932	0.00955693	1.77551	0.0120966	0.0176901	0.990855	3	3	3
P62880	Gnb2	guanine nucleotide binding protein (G protein), beta 2	14693	P62880	-2.66431	0.0511321	0.44567	0.690889	-3.10998	0.289907	2	3	2
P62889	Rpl30	ribosomal protein L30	19946	P62889	-0.689539	0.161396	-0.324439	0.509449	-0.3651	0.752267	3	3	3
P62897	Cycs	cytochrome c, somatic	13063	P62897	1.41498	0.0103444	1.08956	0.0269106	0.325421	0.698873	3	3	3
P62900	Rpl31	ribosomal protein L31	114641	P62900	-1.02263	0.0762692	-1.33734	0.045317	0.314716	0.810691	3	3	3
P62908	Rps3	ribosomal protein S3	27050	P62908	0.85723	0.223484	0.336599	0.649758	0.520631	0.755798	3	3	3
P62911	Rpl32	ribosomal protein L32	19951	P62911	-1.28212	0.0200625	-0.852251	0.0758091	-0.429866	0.653231	3	3	3
P62915	Gtf2b	general transcription factor IIB	229906	P62915	0.286044	0.393542	0.289572	0.370595	-0.00352811	0.998407	3	2	3
P62918	Rpl8	ribosomal protein L8	26961	P62918	-0.682292	0.0642345	-0.695694	0.0745309	0.0134019	0.990855	3	3	3
P62960	Ybx1	Y box protein 1	22608	P62960	-1.23421	0.389741	-1.18053	0.438928	-0.0536728	0.991818	3	3	3
P62962	Pfn1	profilin 1	18643	P62962	-0.250283	0.685966	-0.671661	0.302566	0.421378	0.779181	3	3	3
P62983	Rps27a	ribosomal protein S27A	78294	P62983	1.87001	0.481437	-0.500293	0.885402	2.37031	0.7323	1	3	1
P62984	Uba52	ubiquitin A-52 residue ribosomal protein fusion product 1	22186	P62984	Inf	0	-2.91277	0.629697	Inf	0	1	0	3
P62996	Tra2b	transformer 2 beta	20462	P62996	-0.694891	0.389876	-0.1085	0.910302	-0.586391	0.767647	3	3	3
P63001	Rac1	Rac family small GTPase 1	19353	P63001	1.77603	0.0865467	0.590272	0.545616	1.18576	0.610505	3	3	3
P63005	Pafah1b1	platelet-activating factor acetylhydrolase, isoform 1b, subunit 1	18472	P63005	-0.139716	0.795864	-0.180544	0.753612	0.0408282	0.985949	3	3	3
P63017	Hspa8	heat shock protein 8	15481	P63017	0.142347	0.462265	-0.325486	0.147604	0.467834	0.352122	3	3	3
P63024	Vamp3	vesicle-associated membrane protein 3	22319	P63024	#NAME?	0	#NAME?	0	-0.396882	0.657416	0	3	3
P63028	Tpt1	tumor protein, translationally-controlled 1	22070	P63028	2.04929	0.0370944	1.27379	0.147193	0.775504	0.687467	3	3	3
P63030	Mpc1	mitochondrial pyruvate carrier 1	55951	P63030	0.690128	0.809303	1.21226	0.631814	-0.522134	0.961316	2	1	2
P63034	Cyth2	cytohesin 2	19158	P63034	-0.603584	0.407014	0.514577	0.505996	-1.11816	0.538912	3	3	3
P63037	Dnaja1	DnaJ heat shock protein family (Hsp40) member A1	15502	P63037	0.890539	0.114685	0.936692	0.118515	-0.0461532	0.983177	3	3	3
P63038	Hspd1	heat shock protein 1 (chaperonin)	15510	P63038	0.295847	0.286201	-0.0900738	0.765399	0.38592	0.568867	3	3	3
P63073	Eif4e	eukaryotic translation initiation factor 4E	13684	P63073	-0.206146	0.895785	0.474279	0.752538	-0.680425	0.860022	3	3	3
P63085	Mapk1	mitogen-activated protein kinase 1	26413	P63085	-0.941245	0.465534	-0.452794	0.753796	-0.488452	0.913588	3	3	3
P63087	Ppp1cc	protein phosphatase 1 catalytic subunit gamma	19047	P63087	-0.445116	0.660371	0.17934	0.87756	-0.624457	0.810691	3	3	3
P63094	Gnas	GNAS (guanine nucleotide binding protein, alpha stimulating) complex locus	14683	P63094	-3.30796	0.0264233	-1.73458	0.145909	-1.57337	0.505887	2	3	3
P63101	Ywhaz	tyrosine 3-monooxygenase/tryptophan 5-monooxygenase activation protein, zeta polypeptide	22631	P63101	1.37812	0.0156052	0.761271	0.100948	0.616848	0.522267	3	3	3
P63139	Nfyb	nuclear transcription factor-Y beta	18045	P63139	0.146257	NA	0.503366	NA	-0.357109	NA	1	1	1
P63154	Crnkl1	crooked neck pre-mRNA splicing factor 1	66877	P63154	-2.14326	0.033187	-0.599809	0.383256	-1.54345	0.263929	1	3	3
P63158	Hmgb1	high mobility group box 1	15289	P63158	-0.777412	0.135062	-0.67351	0.201602	-0.103902	0.958335	3	3	3
P63166	Sumo1	small ubiquitin-like modifier 1	22218	P63166	0.14605	0.877082	0.378992	0.676814	-0.232942	0.939228	3	3	3
P63168	Dynll1	dynein light chain LC8-type 1	56455	P63168	-1.27394	0.200858	-2.94325	0.0302136	1.66931	0.493783	3	3	3
P63213	Gng2	guanine nucleotide binding protein (G protein), gamma 2	14702	P63213	-2.27468	0.233782	-1.6809	0.395331	-0.593786	0.915564	2	3	3
P63242	Eif5a	eukaryotic translation initiation factor 5A	276770	P63242	1.13467	0.634263	2.77568	0.413726	-1.64101	0.852418	3	2	1
P63260	Actg1	actin, gamma, cytoplasmic 1	11465	P63260	-3.68564	0.00597366	-3.37056	0.00800161	-0.315081	0.820911	2	3	3
P63271	Supt4a	SPT4A, DSIF elongation factor subunit	20922	P63271	-1.14219	0.143375	-0.980239	0.216516	-0.161953	0.956906	3	3	3
P63276	Rps17	ribosomal protein S17	20068	P63276	-2.25609	0.0309254	-1.25971	0.158804	-0.996377	0.610566	3	3	3
P63280	Ube2i	ubiquitin-conjugating enzyme E2I	22196	P63280	-0.882947	0.285373	-1.4744	0.119688	0.591452	0.767647	3	3	3
P63318	Prkcg	protein kinase C, gamma	18752	P63318	#NAME?	0	NA	NA	#NAME?	0	0	3	0
P63321	Rala	v-ral simian leukemia viral oncogene A (ras related)	56044	P63321	-2.56293	0.00789383	-1.42002	0.0468237	-1.14291	0.401233	3	3	3
P63323	P63323	NA	NA	P63323	-1.09179	0.0583297	-1.56708	0.0259117	0.475289	0.688053	3	3	3
P63325	Rps10	ribosomal protein S10	67097	P63325	0.531261	0.625732	1.42326	0.227439	-0.891995	0.740311	3	3	3
P63330	Ppp2ca	protein phosphatase 2 (formerly 2A), catalytic subunit, alpha isoform	19052	P63330	-2.072	0.0179407	-1.47426	0.057657	-0.597732	0.688053	3	3	3
P67778	Phb	prohibitin	18673	P67778	-0.496547	0.484391	-0.149162	0.862263	-0.347385	0.864023	3	3	3
P67871	Csnk2b	casein kinase 2, beta polypeptide	13001	P67871	-0.709424	0.744011	-0.945672	0.699465	0.236248	0.97646	1	3	2
P67984	Rpl22	ribosomal protein L22	19934	P67984	-1.32223	0.0685306	-1.17514	0.111503	-0.147093	0.954604	3	3	3
P68037	Ube2l3	ubiquitin-conjugating enzyme E2L 3	22195	P68037	-0.0016361	0.99972	-0.394577	0.866321	0.392941	0.958335	3	3	3
P68040	Rack1	receptor for activated C kinase 1	14694	P68040	0.312358	0.254434	-0.202438	0.479488	0.514796	0.429935	3	3	3
P68254	Ywhaq	tyrosine 3-monooxygenase/tryptophan 5-monooxygenase activation protein theta	22630	P68254	1.06246	0.0301135	0.731313	0.0999295	0.331146	0.721531	3	3	3
P68368	Tuba4a	tubulin, alpha 4A	22145	P68368	0.970982	0.108755	1.20705	0.0752234	-0.23607	0.885674	3	3	3
P68372	Tubb4b	tubulin, beta 4B class IVB	227613	P68372	-0.0544027	0.914839	-0.033472	0.950523	-0.0209307	0.989842	3	3	3
P68373	Tuba1c	tubulin, alpha 1C	22146	P68373	2.3379	0.157304	0.900688	0.592036	1.43721	0.717747	3	3	3
P68433	H3c8	H3 clustered histone 8	97908	P68433	-0.691585	0.738757	-2.06724	0.399134	1.37566	0.740311	1	3	2
P68510	Ywhah	tyrosine 3-monooxygenase/tryptophan 5-monooxygenase activation protein, eta polypeptide	22629	P68510	-1.54833	0.0319638	-1.45674	0.045317	-0.0915895	0.971373	3	3	3
P69566	Ranbp9	RAN binding protein 9	56705	P69566	#NAME?	0	#NAME?	0	-0.559093	0.788069	0	3	3
P70122	Sbds	SBDS ribosome maturation factor	66711	P70122	-0.900752	0.199564	-0.60592	0.402824	-0.294831	0.88375	3	3	3
P70168	Kpnb1	karyopherin (importin) beta 1	16211	P70168	0.522138	0.076271	0.282694	0.307021	0.239444	0.715518	3	3	3
P70175	Dlg3	discs large MAGUK scaffold protein 3	53310	P70175	#NAME?	0	#NAME?	0	-0.433668	0.829095	0	2	1
P70195	Psmb7	proteasome (prosome, macropain) subunit, beta type 7	19177	P70195	-1.20184	0.544912	-0.94092	0.667515	-0.260921	0.977657	3	3	3
P70206	Plxna1	plexin A1	18844	P70206	#NAME?	0	NA	NA	#NAME?	0	0	3	0
P70236	Map2k6	mitogen-activated protein kinase kinase 6	26399	P70236	-1.88235	0.251683	-2.4786	0.204537	0.596253	0.850662	1	3	2
P70268	Pkn1	protein kinase N1	320795	P70268	#NAME?	0	#NAME?	0	0.298636	0.97646	0	2	2
P70279	Surf6	surfeit gene 6	20935	P70279	-2.69404	0.0610586	-2.5272	0.0881581	-0.166843	0.97646	3	3	3
P70280	Vamp7	vesicle-associated membrane protein 7	20955	P70280	2.21318	0.200889	Inf	0	#NAME?	0	3	2	0
P70288	Hdac2	histone deacetylase 2	15182	P70288	-1.98854	0.0966034	-2.03167	0.109795	0.0431302	0.990855	3	3	3
P70290	Mpp1	membrane protein, palmitoylated	17524	P70290	-2.89993	0.0145232	-2.46461	0.0287245	-0.435325	0.831605	3	3	3
P70296	Pebp1	phosphatidylethanolamine binding protein 1	23980	P70296	2.38303	0.0152301	1.6389	0.0555306	0.744135	0.646284	3	3	3
P70318	Tial1	Tia1 cytotoxic granule-associated RNA binding protein-like 1	21843	P70318	-1.93524	0.00789383	-2.34617	0.00522688	0.41093	0.688053	3	3	3
P70333	Hnrnph2	heterogeneous nuclear ribonucleoprotein H2	56258	P70333	-0.492162	0.710874	-0.33462	0.773107	-0.157542	0.974739	1	1	3
P70335	Rock1	Rho-associated coiled-coil containing protein kinase 1	19877	P70335	#NAME?	0	#NAME?	0	-1.20626	0.52297	0	3	3
P70336	Rock2	Rho-associated coiled-coil containing protein kinase 2	19878	P70336	-1.09745	0.278978	-0.366666	0.749823	-0.73078	0.756994	2	3	2
P70349	Hint1	histidine triad nucleotide binding protein 1	15254	P70349	0.452405	0.701597	0.110732	0.936704	0.341673	0.932525	3	3	3
P70351	Ezh1	enhancer of zeste 1 polycomb repressive complex 2 subunit	14055	P70351	-1.0745	0.662999	-1.42374	0.592036	0.349247	0.958335	1	3	3
P70353	Nfyc	nuclear transcription factor-Y gamma	18046	P70353	-0.763273	0.427634	-1.29088	0.229137	0.527608	0.81747	2	3	3
P70362	Ufd1	ubiquitin recognition factor in ER-associated degradation 1	22230	P70362	-1.16053	0.06266	0.432887	0.352878	-1.59342	0.231382	1	3	2
P70371	Terf1	telomeric repeat binding factor 1	21749	P70371	#NAME?	0	#NAME?	0	-0.190643	0.978601	0	3	3
P70372	Elavl1	ELAV (embryonic lethal, abnormal vision)-like 1 (Hu antigen R)	15568	P70372	-1.04596	0.081901	-1.0171	0.106994	-0.0288533	0.989186	3	3	3
P70388	P70388	NA	NA	P70388	#NAME?	0	#NAME?	0	-1.35071	0.482366	0	3	3
P70398	Usp9x	ubiquitin specific peptidase 9, X chromosome	22284	P70398	-0.12431	0.91426	0.221	0.842099	-0.34531	0.916932	3	3	3
P70399	Trp53bp1	transformation related protein 53 binding protein 1	27223	P70399	-0.826806	0.5643	0.531816	0.734643	-1.35862	0.610566	1	3	3
P70404	Idh3g	isocitrate dehydrogenase 3 (NAD+), gamma	15929	P70404	-1.37956	0.17989	-1.62943	0.145992	0.249867	0.948099	3	3	3
P70412	P70412	NA	NA	P70412	#NAME?	0	#NAME?	0	-2.31431	0.412412	0	3	3
P70441	Slc9a3r1	solute carrier family 9 (sodium/hydrogen exchanger), member 3 regulator 1	26941	P70441	-4.33876	0.000613093	-4.18224	0.000944144	-0.156526	0.901842	3	3	3
P70452	Stx4a	syntaxin 4A (placental)	20909	P70452	#NAME?	0	#NAME?	0	-0.853644	0.888549	0	3	3
P70460	Vasp	vasodilator-stimulated phosphoprotein	22323	P70460	-3.02803	0.00781386	-2.21743	0.0214836	-0.810602	0.610566	3	3	3
P70670	Naca	nascent polypeptide-associated complex alpha polypeptide	17938	P70670	-0.0745965	0.772513	-0.566697	0.0665603	0.4921	0.412412	3	3	3
P70677	Casp3	caspase 3	12367	P70677	#NAME?	0	#NAME?	0	-1.14169	0.525456	0	1	2
P70695	Fbp2	fructose bisphosphatase 2	14120	P70695	-0.254908	0.429676	-0.637231	0.104099	0.382324	0.637444	3	3	3
P70698	Ctps	cytidine 5'-triphosphate synthase	51797	P70698	0.359138	0.840214	1.8058	0.306071	-1.44667	0.721531	3	3	3
P70699	Gaa	glucosidase, alpha, acid	14387	P70699	-0.499416	0.999951	NA	NA	NA	NA	2	1	1
P70700	Polr1b	polymerase (RNA) I polypeptide B	20017	P70700	-2.67715	0.040436	-0.848988	0.441662	-1.82816	0.486599	3	3	3
P80313	Cct7	chaperonin containing Tcp1, subunit 7 (eta)	12468	P80313	0.276574	0.418366	-0.128639	0.733435	0.405212	0.636311	3	3	3
P80314	Cct2	chaperonin containing Tcp1, subunit 2 (beta)	12461	P80314	-0.0531029	0.897162	-0.340013	0.373256	0.28691	0.740446	3	3	3
P80315	Cct4	chaperonin containing Tcp1, subunit 4 (delta)	12464	P80315	-1.17501	0.0389435	-1.32249	0.0337695	0.147482	0.92656	3	3	3
P80316	Cct5	chaperonin containing Tcp1, subunit 5 (epsilon)	12465	P80316	-0.382619	0.185681	-0.579034	0.0870537	0.196415	0.776139	3	3	3
P80317	Cct6a	chaperonin containing Tcp1, subunit 6a (zeta)	12466	P80317	-0.113384	0.674673	-0.369273	0.207037	0.255889	0.698873	3	3	3
P80318	Cct3	chaperonin containing Tcp1, subunit 3 (gamma)	12462	P80318	-0.404233	0.302388	-0.398887	0.333557	-0.00534621	0.997225	3	3	3
P81269	Atf1	activating transcription factor 1	11908	P81269	0.032302	0.979305	-1.34042	0.246672	1.37272	0.567757	2	3	3
P82343	Renbp	renin binding protein	19703	P82343	-1.40225	0.0901643	-1.66351	0.0696257	0.261266	0.91853	3	3	3
P83741	Wnk1	WNK lysine deficient protein kinase 1	232341	P83741	-2.36325	0.0806047	-1.61241	0.191587	-0.750838	0.688053	1	3	3
P83870	Phf5a	PHD finger protein 5A	68479	P83870	-0.819938	0.150049	-0.876146	0.149005	0.0562072	0.982129	3	3	3
P83882	Rpl36a	ribosomal protein L36A	19982	P83882	-1.32795	0.183989	-0.374456	0.7199	-0.953494	0.688053	3	3	3
P83887	Tubg1	tubulin, gamma 1	103733	P83887	#NAME?	0	#NAME?	0	-2.68391	0.401233	0	1	2
P83917	Cbx1	chromobox 1	12412	P83917	0.065917	0.968216	1.54347	0.245036	-1.47755	0.629996	3	3	3
P83940	Eloc	elongin C	67923	P83940	-1.78993	0.0305316	-1.26584	0.0949939	-0.524082	0.734031	3	3	3
P84084	Arf5	ADP-ribosylation factor 5	11844	P84084	-0.818447	0.406969	-0.143526	0.902211	-0.674921	0.780086	3	3	3
P84089	Erh	ERH mRNA splicing and mitosis factor	13877	P84089	-0.576043	0.419837	-0.621712	0.42082	0.0456693	0.989186	3	3	3
P84091	Ap2m1	adaptor-related protein complex 2, mu 1 subunit	11773	P84091	-1.306	0.0180321	-0.871286	0.0688906	-0.434713	0.64454	3	3	3
P84099	Rpl19	ribosomal protein L19	19921	P84099	-2.29734	0.0136545	-2.08917	0.0227731	-0.208163	0.923001	3	3	3
P84104	Srsf3	serine and arginine-rich splicing factor 3	20383	P84104	-1.86889	0.00295744	-1.95926	0.00320808	0.090375	0.929012	3	3	3
P86448	Trim43b	tripartite motif-containing 43B	666747	P86448	2.6914	0.0504275	2.71865	0.05963	-0.0272468	0.995812	3	3	3
P97287	Mcl1	myeloid cell leukemia sequence 1	17210	P97287	-0.401439	0.599463	0.295113	0.726518	-0.696552	0.720192	3	3	3
P97302	Bach1	BTB and CNC homology 1, basic leucine zipper transcription factor 1	12013	P97302	#NAME?	0	#NAME?	0	-0.466312	0.932664	0	3	3
P97310	Mcm2	minichromosome maintenance complex component 2	17216	P97310	-0.476332	0.249685	-0.281236	0.511982	-0.195096	0.864023	3	3	3
P97311	Mcm6	minichromosome maintenance complex component 6	17219	P97311	0.0337691	0.959187	-0.0294871	0.965058	0.0632562	0.978601	3	3	3
P97313	Prkdc	protein kinase, DNA activated, catalytic polypeptide	19090	P97313	#NAME?	0	NA	NA	#NAME?	0	0	3	0
P97314	Csrp2	cysteine and glycine-rich protein 2	13008	P97314	-4.66185	0.0133921	-3.60292	0.0318384	-1.05892	0.668067	2	3	3
P97315	Csrp1	cysteine and glycine-rich protein 1	13007	P97315	-2.41281	0.00789383	-2.30775	0.0101382	-0.105064	0.958335	3	3	3
P97329	Kif20a	kinesin family member 20A	19348	P97329	-1.26524	0.285534	-0.115223	0.934942	-1.15002	0.688053	3	3	3
P97351	Rps3a1	ribosomal protein S3A1	20091	P97351	-0.569339	0.0727413	-0.330413	0.264228	-0.238926	0.722675	3	3	3
P97355	Sms	spermine synthase	20603	P97355	1.26911	0.198771	0.690486	0.493393	0.578621	0.81747	3	3	3
P97363	Sptlc2	serine palmitoyltransferase, long chain base subunit 2	20773	P97363	-0.452924	0.70424	0.09893	0.946703	-0.551854	0.844964	2	3	3
P97364	Sephs2	selenophosphate synthetase 2	20768	P97364	-0.439111	0.424268	-0.0346639	0.960776	-0.404447	0.720489	1	3	2
P97370	Atp1b3	ATPase, Na+/K+ transporting, beta 3 polypeptide	11933	P97370	-0.0517274	0.959944	-0.41834	0.642322	0.366612	0.87937	3	3	3
P97371	Psme1	proteasome (prosome, macropain) activator subunit 1 (PA28 alpha)	19186	P97371	#NAME?	0	#NAME?	0	-2.67974	0.760058	0	2	1
P97376	Frg1	FSHD region gene 1	14300	P97376	-3.24053	0.0225294	-2.914	0.0375711	-0.32653	0.929012	3	3	3
P97377	Cdk2	cyclin-dependent kinase 2	12566	P97377	-0.537109	0.794956	-0.474789	0.834092	-0.0623199	0.990855	1	3	3
P97379	G3bp2	GTPase activating protein (SH3 domain) binding protein 2	23881	P97379	-0.0572852	0.862653	-0.838958	0.0390808	0.781673	0.301592	3	3	3
P97384	Anxa11	annexin A11	11744	P97384	-1.84505	0.184525	-1.1192	0.410312	-0.725849	0.740446	1	3	3
P97386	P97386	NA	NA	P97386	-2.59293	0.16452	-2.5863	0.18574	-0.00663137	0.999687	3	3	3
P97393	P97393	NA	NA	P97393	#NAME?	0	#NAME?	0	0.297486	0.958335	0	2	3
P97429	Anxa4	annexin A4	11746	P97429	-4.1707	0.0517498	-3.30749	0.10247	-0.863206	0.740446	1	3	3
P97432	Nbr1	NBR1, autophagy cargo receptor	17966	P97432	-0.870835	0.300121	0.0204955	0.98172	-0.891331	0.584517	1	2	3
P97434	Mprip	myosin phosphatase Rho interacting protein	26936	P97434	-3.63463	0.0729714	-1.05459	0.520253	-2.58004	0.411254	1	3	3
P97449	Anpep	alanyl (membrane) aminopeptidase	16790	P97449	1.32283	0.257128	2.00092	0.180427	-0.678089	0.820098	3	1	1
P97450	Atp5j	ATP synthase, H+ transporting, mitochondrial F0 complex, subunit F	11957	P97450	-1.08835	0.0277571	-0.968493	0.0467911	-0.11986	0.928097	3	3	3
P97452	Bop1	block of proliferation 1	12181	P97452	0.015897	0.986355	1.07989	0.243885	-1.06399	0.582491	2	3	3
P97461	Rps5	ribosomal protein S5	20103	P97461	0.115271	0.852336	-0.401509	0.500152	0.516779	0.718013	3	3	3
P97468	Cmklr1	chemokine-like receptor 1	14747	P97468	#NAME?	0	#NAME?	0	-1.83244	0.610566	0	2	2
P97470	Ppp4c	protein phosphatase 4, catalytic subunit	56420	P97470	-1.89863	0.246354	-0.962208	0.445097	-0.936427	0.81747	3	1	2
P97471	Smad4	SMAD family member 4	17128	P97471	-1.66067	0.536588	-0.0775138	0.98172	-1.58316	0.740446	1	3	3
P97473	Tarbp2	TARBP2, RISC loading complex RNA binding subunit	21357	P97473	-0.170602	0.94223	-0.0863956	0.975276	-0.0842064	0.990855	1	2	1
P97477	Aurka	aurora kinase A	20878	P97477	-0.552928	0.502323	-0.832112	0.354505	0.279184	0.925985	3	3	3
P97478	Coq7	demethyl-Q 7	12850	P97478	-0.165761	0.831057	0.786165	0.504842	-0.951926	0.726015	1	2	1
P97496	Smarcc1	SWI/SNF related, matrix associated, actin dependent regulator of chromatin, subfamily c, member 1	20588	P97496	-2.07607	0.237829	-2.72383	0.158151	0.647765	0.910715	3	3	3
P97742	Cpt1a	carnitine palmitoyltransferase 1a, liver	12894	P97742	-2.07039	0.0382633	-1.32414	0.116538	-0.746248	0.538912	1	3	3
P97760	Polr2c	polymerase (RNA) II (DNA directed) polypeptide C	20021	P97760	-0.953362	0.389861	-0.879681	0.453669	-0.0736808	0.982377	1	3	3
P97770	Thumpd3	THUMP domain containing 3	14911	P97770	#NAME?	0	#NAME?	0	-0.117109	0.983027	0	2	2
P97792	Cxadr	coxsackie virus and adenovirus receptor	13052	P97792	-3.01021	0.00955693	-2.06109	0.0340969	-0.949124	0.584517	3	3	3
P97807	Fh1	fumarate hydratase 1	14194	P97807	-0.132577	0.777767	0.179275	0.714189	-0.311851	0.778902	3	3	3
P97821	Ctsc	cathepsin C	13032	P97821	0.313067	0.792667	1.90068	0.14514	-1.58762	0.576475	3	3	3
P97822	Anp32e	acidic (leucine-rich) nuclear phosphoprotein 32 family, member E	66471	P97822	-0.727493	0.577736	-0.94918	0.495256	0.221687	0.970635	3	3	3
P97823	Lypla1	lysophospholipase 1	18777	P97823	-0.38619	0.872095	0.0835453	0.974833	-0.469736	0.953452	2	2	3
P97855	G3bp1	GTPase activating protein (SH3 domain) binding protein 1	27041	P97855	-0.000521333	0.99972	-0.486354	0.405122	0.485833	0.721531	3	3	3
P97868	Rbbp6	retinoblastoma binding protein 6, ubiquitin ligase	19647	P97868	-0.85764	0.320012	-1.62209	0.116436	0.764455	0.688053	2	3	3
P97930	Dtymk	deoxythymidylate kinase	21915	P97930	-0.791316	0.708683	-0.638415	0.753697	-0.152901	0.987066	3	2	3
P98078	Dab2	disabled 2, mitogen-responsive phosphoprotein	13132	P98078	-1.91341	0.0181661	-1.89073	0.0236732	-0.0226777	0.990855	3	3	3
P98192	Gnpat	glyceronephosphate O-acyltransferase	14712	P98192	-0.188158	0.694856	-0.67285	0.357825	0.484692	0.753402	2	3	1
P98203	Arvcf	armadillo repeat gene deleted in velocardiofacial syndrome	11877	P98203	-2.03791	0.136862	-0.968321	0.475167	-1.06959	0.731979	3	3	3
P99024	Tubb5	tubulin, beta 5 class I	22154	P99024	0.611373	0.0537727	0.429561	0.149627	0.181812	0.779631	3	3	3
P99026	Psmb4	proteasome (prosome, macropain) subunit, beta type 4	19172	P99026	-0.580721	0.574434	-1.18081	0.289395	0.600086	0.821858	3	3	3
P99027	Rplp2	ribosomal protein, large P2	67186	P99027	0.617026	0.352372	0.294673	0.679591	0.322353	0.860532	3	3	3
P99028	Uqcrh	ubiquinol-cytochrome c reductase hinge protein	66576	P99028	-0.679175	0.439867	-0.59431	0.533803	-0.0848649	0.982129	2	3	3
P99029	Prdx5	peroxiredoxin 5	54683	P99029	0.954063	0.432185	0.135315	0.927618	0.818748	0.789141	3	3	3
Q00262	Q00262	NA	NA	Q00262	0.147078	0.867415	Inf	0	#NAME?	0	1	2	0
Q00547	Hmmr	hyaluronan mediated motility receptor (RHAMM)	15366	Q00547	1.13781	0.634263	1.10915	0.702276	0.0286622	0.997225	1	2	1
Q00612	G6pdx	glucose-6-phosphate dehydrogenase X-linked	14381	Q00612	2.30562	0.00376043	2.03248	0.0059359	0.273138	0.77232	3	3	3
Q00623	Apoa1	apolipoprotein A-I	11806	Q00623	1.4898	0.150433	2.83339	0.0534104	-1.34358	0.612289	3	3	2
Q00PI9	Hnrnpul2	heterogeneous nuclear ribonucleoprotein U-like 2	68693	Q00PI9	-1.3306	0.0882372	-1.27596	0.115794	-0.0546476	0.985949	3	3	3
Q01237	Hmgcr	3-hydroxy-3-methylglutaryl-Coenzyme A reductase	15357	Q01237	#NAME?	0	#NAME?	0	-0.91285	0.680533	0	2	1
Q01320	Top2a	topoisomerase (DNA) II alpha	21973	Q01320	-0.637841	0.136898	0.223974	0.602808	-0.861814	0.398754	3	3	3
Q01405	Sec23a	SEC23 homolog A, COPII coat complex component	20334	Q01405	0.556108	0.602791	0.849904	0.45922	-0.293796	0.94216	3	3	3
Q01768	Nme2	NME/NM23 nucleoside diphosphate kinase 2	18103	Q01768	2.57903	0.184525	1.83906	0.349004	0.739965	0.872586	2	3	3
Q01853	Vcp	valosin containing protein	269523	Q01853	0.0308996	0.969175	0.123683	0.866321	-0.0927832	0.976304	3	3	3
Q02053	Uba1	ubiquitin-like modifier activating enzyme 1	22201	Q02053	-0.2082	0.704666	0.249167	0.668906	-0.457367	0.726015	3	3	3
Q02248	Ctnnb1	catenin (cadherin associated protein), beta 1	12387	Q02248	-0.931518	0.0744425	-1.373	0.0318552	0.441484	0.694252	3	3	3
Q02257	Jup	junction plakoglobin	16480	Q02257	-2.14889	0.0198253	-1.68894	0.0475475	-0.459958	0.776139	3	3	3
Q02395	Mtf2	metal response element binding transcription factor 2	17765	Q02395	-1.80763	0.117074	-1.99701	0.111123	0.189378	0.958335	2	3	3
Q02614	Sap30bp	SAP30 binding protein	57230	Q02614	-1.83043	0.115341	-2.0311	0.10697	0.20067	0.961316	3	3	3
Q02819	Nucb1	nucleobindin 1	18220	Q02819	0.00206745	0.997865	-0.0218229	0.973688	0.0238904	0.989842	3	3	3
Q03173	Enah	ENAH actin regulator	13800	Q03173	-2.44138	0.0360339	-1.89471	0.086689	-0.546671	0.81747	3	3	3
Q03249	Galt	galactose-1-phosphate uridyl transferase	14430	Q03249	#NAME?	0	#NAME?	0	-0.848309	0.669485	0	2	2
Q03265	Atp5a1	ATP synthase, H+ transporting, mitochondrial F1 complex, alpha subunit 1	11946	Q03265	0.34581	0.204597	0.400378	0.174646	-0.0545678	0.958335	3	3	3
Q03347	Q03347	NA	NA	Q03347	#NAME?	0	#NAME?	0	-0.945498	0.653231	0	3	2
Q03958	Pfdn6	prefoldin subunit 6	14976	Q03958	-0.926895	0.105478	-0.598805	0.27968	-0.32809	0.807175	3	3	3
Q04447	Ckb	creatine kinase, brain	12709	Q04447	1.38459	0.015821	0.925169	0.0625782	0.45942	0.636311	3	3	3
Q04519	Smpd1	sphingomyelin phosphodiesterase 1, acid lysosomal	20597	Q04519	-0.560758	0.705885	-0.737489	0.639218	0.176731	0.97646	2	3	3
Q04692	Smarcad1	SWI/SNF-related, matrix-associated actin-dependent regulator of chromatin, subfamily a, containing DEAD/H box 1	13990	Q04692	-0.567711	0.452705	-0.683353	0.408496	0.115642	0.976304	3	3	3
Q04736	Yes1	YES proto-oncogene 1, Src family tyrosine kinase	22612	Q04736	-3.98346	0.0014829	-2.7071	0.00473336	-1.27636	0.207564	1	3	3
Q04750	Top1	topoisomerase (DNA) I	21969	Q04750	-0.661735	0.128793	-0.83087	0.0883683	0.169134	0.890532	3	3	3
Q04997	Inha	inhibin alpha	16322	Q04997	-0.660941	0.394873	0.237153	0.782583	-0.898094	0.610566	2	3	3
Q05512	Mark2	MAP/microtubule affinity regulating kinase 2	13728	Q05512	0.27534	0.8821	-0.105153	0.960106	0.380493	0.927625	1	3	3
Q05793	Hspg2	perlecan (heparan sulfate proteoglycan 2)	15530	Q05793	#NAME?	0	#NAME?	0	-2.02956	0.231382	0	3	3
Q05816	Fabp5	fatty acid binding protein 5, epidermal	16592	Q05816	0.380773	0.318872	0.456028	0.261317	-0.075255	0.958788	3	3	3
Q05920	Q05920	NA	NA	Q05920	0.560436	0.129738	0.852319	0.053238	-0.291883	0.724864	3	3	3
Q05CL8	Larp7	La ribonucleoprotein domain family, member 7	28036	Q05CL8	-2.78408	0.0493162	-1.59676	0.191548	-1.18732	0.629996	2	3	3
Q05D44	Eif5b	eukaryotic translation initiation factor 5B	226982	Q05D44	-0.829222	0.212143	-0.44647	0.511914	-0.382752	0.81895	3	3	3
Q06138	Cab39	calcium binding protein 39	12283	Q06138	0.994584	0.663204	0.167307	0.954074	0.827277	0.915564	3	3	3
Q06180	Ptpn2	protein tyrosine phosphatase, non-receptor type 2	19255	Q06180	-1.43082	0.362318	-0.300626	0.881366	-1.13019	0.797216	3	3	2
Q06185	Atp5k	ATP synthase, H+ transporting, mitochondrial F1F0 complex, subunit E	11958	Q06185	-1.35893	0.0101641	-1.764	0.00586111	0.405073	0.610566	3	3	3
Q06890	Clu	clusterin	12759	Q06890	1.50117	0.0257722	1.47788	0.033429	0.0232914	0.990626	3	3	3
Q07076	Anxa7	annexin A7	11750	Q07076	2.08126	0.00469857	2.06437	0.00580362	0.0168852	0.990855	3	3	3
Q07113	Igf2r	insulin-like growth factor 2 receptor	16004	Q07113	-1.84341	0.0205937	-1.49162	0.0457322	-0.351784	0.810691	3	3	3
Q07235	Serpine2	serine (or cysteine) peptidase inhibitor, clade E, member 2	20720	Q07235	-1.22768	0.352785	-0.805394	0.562007	-0.422287	0.915564	2	3	3
Q07417	Acads	acyl-Coenzyme A dehydrogenase, short chain	11409	Q07417	-1.02456	0.611906	-0.418195	0.862263	-0.606363	0.925985	2	3	3
Q07813	Bax	BCL2-associated X protein	12028	Q07813	-2.69834	0.0211562	-1.62647	0.104099	-1.07187	0.610505	3	3	3
Q08024	Cbfb	core binding factor beta	12400	Q08024	#NAME?	0	NA	NA	#NAME?	0	0	3	0
Q08093	Cnn2	calponin 2	12798	Q08093	-4.90476	0.0157391	-4.80518	0.0214836	-0.099572	0.983177	2	3	3
Q08122	Tle3	transducin-like enhancer of split 3	21887	Q08122	-0.350717	0.82697	-0.399872	0.771075	0.0491548	0.990855	1	1	3
Q08288	Lyar	Ly1 antibody reactive clone	17089	Q08288	-2.87934	0.00449066	-2.55365	0.00666809	-0.325686	0.802812	3	3	3
Q08297	Rad51	RAD51 recombinase	19361	Q08297	-1.16305	0.269586	-0.194183	0.791372	-0.968866	0.688053	2	1	2
Q08481	Pecam1	platelet/endothelial cell adhesion molecule 1	18613	Q08481	#NAME?	0	#NAME?	0	0.016926	0.997225	0	2	2
Q08879	Fbln1	fibulin 1	14114	Q08879	#NAME?	0	#NAME?	0	-2.19594	0.522267	0	3	2
Q08943	Ssrp1	structure specific recognition protein 1	20833	Q08943	-0.0973601	0.590453	-0.360219	0.0995998	0.262859	0.561833	3	3	3
Q09143	Slc7a1	solute carrier family 7 (cationic amino acid transporter, y+ system), member 1	11987	Q09143	#NAME?	0	#NAME?	0	-0.347848	0.954825	0	3	3
Q09324	Gcnt1	glucosaminyl (N-acetyl) transferase 1, core 2	14537	Q09324	#NAME?	0	#NAME?	0	-1.20509	0.892152	0	2	2
Q09XV5	Chd8	chromodomain helicase DNA binding protein 8	67772	Q09XV5	-1.26432	0.355194	-1.02594	0.442599	-0.238387	0.9478	1	2	3
Q0GNC1	Inf2	inverted formin, FH2 and WH2 domain containing	70435	Q0GNC1	#NAME?	0	#NAME?	0	-0.369355	0.9478	0	3	3
Q0KL02	Trio	triple functional domain (PTPRF interacting)	223435	Q0KL02	#NAME?	0	NA	NA	#NAME?	0	0	3	0
Q0P678	Zc3h18	zinc finger CCCH-type containing 18	76014	Q0P678	-0.386659	0.572068	-0.369036	0.621297	-0.0176228	0.995566	3	3	3
Q0VBL3	Rbm15	RNA binding motif protein 15	229700	Q0VBL3	-1.02098	0.180362	-1.55049	0.0826968	0.529507	0.767647	3	3	3
Q0VG62	Rbis	ribosomal biogenesis factor	69126	Q0VG62	#NAME?	0	#NAME?	0	0.347666	0.925985	0	3	3
Q0VGB7	Ppp4r2	protein phosphatase 4, regulatory subunit 2	232314	Q0VGB7	-2.33787	0.0114189	-2.52504	0.0123932	0.187171	0.810141	1	3	3
Q0VGT4	Zgrf1	zinc finger, GRF-type containing 1	71643	Q0VGT4	#NAME?	0	NA	NA	#NAME?	0	0	3	0
Q0VGY8	Tanc1	tetratricopeptide repeat, ankyrin repeat and coiled-coil containing 1	66860	Q0VGY8	0.752292	0.705182	0.554968	0.795645	0.197325	0.97646	1	3	3
Q11011	Npepps	aminopeptidase puromycin sensitive	19155	Q11011	-3.16672	0.0407261	-1.82794	0.181439	-1.33877	0.661654	3	3	3
Q11136	Pepd	peptidase D	18624	Q11136	-0.770811	0.412242	-0.680635	0.498731	-0.0901761	0.982545	3	3	3
Q148V7	Relch	RAB11 binding and LisH domain, coiled-coil and HEAT repeat containing	227446	Q148V7	Inf	0	Inf	0	NA	NA	3	0	0
Q148V8	Fam83h	family with sequence similarity 83, member H	105732	Q148V8	#NAME?	0	#NAME?	0	-0.578829	0.747005	0	3	3
Q149F1	Rpusd2	RNA pseudouridylate synthase domain containing 2	271842	Q149F1	0.00714167	0.994633	-0.00958893	0.991403	0.0167306	0.994657	1	3	3
Q14AI0	Dscc1	DNA replication and sister chromatid cohesion 1	72107	Q14AI0	-0.329123	NA	Inf	0	#NAME?	0	1	1	0
Q14AX6	Cdk12	cyclin-dependent kinase 12	69131	Q14AX6	#NAME?	0	#NAME?	0	-1.09487	0.765524	0	1	3
Q14B71	Cdca2	cell division cycle associated 2	108912	Q14B71	#NAME?	0	NA	NA	#NAME?	0	0	3	0
Q14C51	Ptcd3	pentatricopeptide repeat domain 3	69956	Q14C51	-2.15692	0.387491	-1.17032	0.667515	-0.986603	0.846927	1	3	2
Q14CH7	Aars2	alanyl-tRNA synthetase 2, mitochondrial	224805	Q14CH7	#NAME?	0	#NAME?	0	0.403805	0.688232	0	2	1
Q1EHW4	Sap25	sin3 associated polypeptide	751865	Q1EHW4	0.557991	0.76313	Inf	0	#NAME?	0	1	2	0
Q1HFZ0	Nsun2	NOL1/NOP2/Sun domain family member 2	28114	Q1HFZ0	-1.17346	0.0600978	-0.968612	0.116135	-0.204843	0.906258	3	3	3
Q1PSW8	Trim71	tripartite motif-containing 71	636931	Q1PSW8	#NAME?	0	#NAME?	0	-1.76655	0.610566	0	3	1
Q2KN98	Specc1l	sperm antigen with calponin homology and coiled-coil domains 1-like	74392	Q2KN98	#NAME?	0	#NAME?	0	0.180465	0.958335	0	3	3
Q2TPA8	Hsdl2	hydroxysteroid dehydrogenase like 2	72479	Q2TPA8	0.103414	0.950786	-0.677442	0.673428	0.780857	0.844964	3	3	2
Q2VPQ9	Meaf6	MYST/Esa1-associated factor 6	70088	Q2VPQ9	#NAME?	0	#NAME?	0	0.132225	0.989838	0	2	2
Q2YDW2	Msto1	misato 1, mitochondrial distribution and morphology regulator	229524	Q2YDW2	#NAME?	0	#NAME?	0	-1.33484	0.852418	0	2	1
Q31125	Slc39a7	solute carrier family 39 (zinc transporter), member 7	14977	Q31125	#NAME?	0	#NAME?	0	0.638405	0.885674	0	2	1
Q3B7Z2	Osbp	oxysterol binding protein	76303	Q3B7Z2	-0.605699	0.318563	-0.395473	0.536793	-0.210226	0.919549	3	3	3
Q3KNM2	Marchf5	membrane associated ring-CH-type finger 5	69104	Q3KNM2	2.36101	0.00789383	1.7901	0.0206279	0.570908	0.645025	3	3	3
Q3TB82	Plekhf1	pleckstrin homology domain containing, family F (with FYVE domain) member 1	72287	Q3TB82	-0.990488	0.528001	-0.0964921	0.961326	-0.893996	0.810691	2	3	3
Q3TC46	Patl1	protein associated with topoisomerase II homolog 1 (yeast)	225929	Q3TC46	#NAME?	0	#NAME?	0	0.135643	0.982129	0	3	1
Q3TC72	Fahd2a	fumarylacetoacetate hydrolase domain containing 2A	68126	Q3TC72	0.683009	0.581726	1.38591	0.299282	-0.702901	0.829095	3	3	3
Q3TC93	Hs1bp3	HCLS1 binding protein 3	58240	Q3TC93	-0.745498	0.582449	-0.993188	0.479488	0.24769	0.94947	1	2	3
Q3TCH7	Cul4a	cullin 4A	99375	Q3TCH7	#NAME?	0	#NAME?	0	0.676979	0.839395	0	3	3
Q3TCJ1	Abraxas2	BRISC complex subunit	109359	Q3TCJ1	-2.59387	0.0149321	-0.686726	0.183939	-1.90715	0.224074	1	3	2
Q3TCJ8	Ccdc69	coiled-coil domain containing 69	52570	Q3TCJ8	0.511416	0.422425	0.602032	0.328439	-0.0906161	0.972821	2	1	2
Q3TCN2	Plbd2	phospholipase B domain containing 2	71772	Q3TCN2	-2.65251	0.0292799	-2.30929	0.0475343	-0.343227	0.791011	1	3	3
Q3TDD9	Ppp1r21	protein phosphatase 1, regulatory subunit 21	73825	Q3TDD9	#NAME?	0	#NAME?	0	-3.56764	0.538912	0	2	2
Q3TDN2	Faf2	Fas associated factor family member 2	76577	Q3TDN2	#NAME?	0	#NAME?	0	-0.392859	0.906459	0	3	3
Q3TDQ1	Stt3b	STT3, subunit of the oligosaccharyltransferase complex, homolog B (S. cerevisiae)	68292	Q3TDQ1	#NAME?	0	#NAME?	0	-0.126661	0.985751	0	3	3
Q3TEA8	Hp1bp3	heterochromatin protein 1, binding protein 3	15441	Q3TEA8	#NAME?	0	#NAME?	0	-1.33319	0.87089	0	2	1
Q3TFQ1	Spryd7	SPRY domain containing 7	66674	Q3TFQ1	0.132166	0.949914	0.382484	0.843323	-0.250318	0.958335	1	3	3
[truncated: 2,724 more rows]
