# Supplementary material for: Murine blastocysts generated by in vitro fertilization show increased Warburg metabolism and altered lactate production
Source: eLife. 2022 Sep 15;11:e79153. doi: 10.7554/eLife.79153 (PMC9519152; doi:10.7554/eLife.79153)
Supplement: Figure 6—source data 1. [file elife-79153-fig6-data1.xlsx]

## Sheet: LDHB&A
	LDHB	Fluorescence intensity				Relative fluorescence intensity				LDHA	Fluorescence intensity				Relative fluorescence intensity
		FB	5% BL	20% BL		FB	5% BL	20% BL			FB	5% BL	20% BL		FB	5% BL	20% BL
	1	1334.47	1150.56	701.948		0.791784	0.68266	0.416487		1	Fail	Fail	749.344		Fail	Fail	0.929839
	2	1531.88	1196.95	654.263		0.908909	0.710186	0.388194		2	763.455	Fail	504.259		0.947349	Fail	0.62572
	3	2189.86	857.148	701.361		1.29931	0.508572	0.416138		3	848.317	701.944	Fail		1.05265	0.871021	Fail
	4	1424.4	1119.96	649.337		0.753833	0.592715	0.343648		4	1385.46	816.344	676.379		1.20964	0.712749	0.590546
	5	2405.82	933.264	690.662		1.27323	0.49391	0.365518		5	914.614	882.959	908.653		0.798549	0.770911	0.793344
	6	1838.41	1183.6	807.665		0.972938	0.626393	0.427439		6	1135.96	1096.11	1084.35		0.991806	0.957015	0.946742
	7	2040.08	1221.97	890.515		1.15907	0.694264	0.505947		7	1513.82	1266.21	1198.95		1.13752	0.95146	0.900917
	8	2218.28	992.477	891.228		1.26032	0.563877	0.506352		8	1378.62	1049.42	888.343		1.03592	0.788556	0.667519
	9	1021.93	885.445	916.002		0.580611	0.503067	0.520428		9	1099.99	1050.56	1072.17		0.826559	0.78941	0.80565
	10	1944.77	859.228	856.45		1.06274	0.469534	0.468016		10	1436.45	812.402	878.681		1.15893	0.655445	0.708919
	11	1845.17	1202.05	432.048		1.00831	0.656873	0.236097		11	989.68	1087.37	677.868		0.798473	0.877289	0.546903
	12	2164.42	768.251			1.18277	0.419819			12	1292.26	914.58			1.0426	0.737882
	Average	1685.4									805.886
		1889.54									1145.34
		1760.1									1330.81
		1984.79									1239.47

## Sheet: MCT1
		Fluorescence intensity				Relative fluorescence intensity
		FB	5% BL	20% BL		FB	5% BL	20% BL
	1	1126.61	867.44	588.958		0.966085	0.743845	0.505042
	2	1086.95	860.69	539.055		0.932076	0.738057	0.462249
	3	1222.52	778.183	612.045		1.04833	0.667306	0.524839
	4	1228.55	885.831	594.117		1.05351	0.759616	0.509466
	5	1069.17	639.121	530.08		1.18083	0.705867	0.585438
	6	970.152	870.446	202.582		1.07147	0.96135	0.223738
	7	677.001	935.892	656.36		0.747702	1.03363	0.724906
	8	1413.72	672.134	742.264		0.928832	0.4416	0.487677
	9	1640.78	962.716	567.118		1.07801	0.632516	0.372604
	10	1511.62	847.492	349.883		0.993156	0.556813	0.229878
	Average	1166.16
		905.442
		1522.04
