# Supplementary material for: Murine blastocysts generated by in vitro fertilization show increased Warburg metabolism and altered lactate production
Source: eLife. 2022 Sep 15;11:e79153. doi: 10.7554/eLife.79153 (PMC9519152; doi:10.7554/eLife.79153)
Supplement: Figure 7—figure supplement 1—source data 1. [file elife-79153-fig7-figsupp1-data1.xlsx]

## Sheet: Sheet1
	FB			IVF KAA 5%
	mean	SD	n	mean	SD	n
liver	1.115	0.197501	12	0.95	0.282349	12
fat	2.49	3.03459	16	1.13	0.544669	17
serum	1.05	0.069055	4	0.87	0.136884	4
