# Supplementary material for: Murine blastocysts generated by in vitro fertilization show increased Warburg metabolism and altered lactate production
Source: eLife journal article supplement (doi:10.7554/elife.79153), 2022-09-15
Supplement: supp [file Fat source data.xlsx]

## Sheet: LdhB
	2022-01-13	2022-01-15	2022-01-18	2022-01-22			2022-01-13	2022-01-15	2022-01-18	2022-01-22
LdhB						with actin						4 blots			male	average	SD	ttest
male	192000	229000	1010000	198000	male	FB	0.164103	0.164748	0.413934	0.0872247	male	FB	0.207502		FB	0.264697	0.0446502	0.0428302
	197000	316000	758000	230000			0.25853	0.32377	0.425843	0.258137			0.31657		IVF	0.188145	0.0393794
	176000	261000	922000	209000			0.166038	0.205512	0.523864	0.180172			0.268896
	160000	230000	863000	240000			0.175439	0.211009	0.484831	0.192			0.26582
	141000	170000	604000	184000		IVF	0.184797	0.208333	0.324731	0.175238		IVF	0.223275
	125000	148000	498000	187000			0.121359	0.123333	0.345833	0.128966			0.179873
	138000	170000	585000	207000			0.106977	0.111842	0.247881	0.0775281			0.136057
	124000	152000	467000	145000			0.23221	0.242038	0.199573	0.179678			0.213375
backgroud	107000	111000	612000	107000
	127000	158000	445000	115000
															female	average	SD	ttest
female	207000	240000	862000	286000	female	FB	0.176923	0.186047	0.431	0.19589	female	FB	0.247465		FB	0.338204	0.0674009	0.200214
	204000	234000	915000	367000			0.188889	0.190244	0.622449	0.32193			0.330878		IVF	0.240738	0.0687749
	267000	359000	975000	290000			0.264356	0.332407	0.738636	0.278846			0.403562
	350000	238000	718000	232000			0.289256	0.17	0.777056	0.247335			0.370912
	117000	175000	570000	237000		IVF	0.0841727	0.119863	0.372549	0.0922179		IVF	0.167201
	122000	174000	708000	152000			0.122	0.151304	0.626549	0.227886			0.281935
	162000	191000	571000	129000			0.123664	0.145802	0.375658	0.153389			0.199628
	159000	198000	618000	112000			0.221757	0.265772	0.561818	0.207407			0.314189
backgroud	128000	128000	388000	101000
	128000	150000	425000	93600
											male+female		male	female
												FB	0.207502	0.247465		average	SD	ttest
													0.31657	0.330878	FB	0.301451	0.0659178	0.0148363
													0.268896	0.403562	IVF	0.214441	0.0590088
													0.26582	0.370912
												IVF	0.223275	0.167201
													0.179873	0.281935
													0.136057	0.199628
													0.213375	0.314189

## Sheet: Mct1
	2022-01-13	2022-01-15	2022-01-18	2022-01-22			2022-01-13	2022-01-15	2022-01-18	2022-01-22
Mct1						with actin						4 blots				average	SD	ttest
male	715000	921000	1330000	392000	male	FB	0.611111	0.66259	0.545082	0.172687	male	FB	0.497868		FB	0.621317	0.111714	0.137562
	940000	726000	1240000	353000			1.2336	0.743852	0.696629	0.396184			0.767565		IVF	0.482586	0.117216
	1040000	653000	1380000	263000			0.981132	0.514173	0.784091	0.226724			0.62653
	944000	412000	1420000	203000			1.03509	0.377982	0.797753	0.1624			0.593306
	945000	416000	1050000	218000		IVF	1.23853	0.509804	0.564516	0.207619		IVF	0.630118
	646000	345000	1100000	188000			0.627184	0.2875	0.763889	0.129655			0.452057
	783000	403000	1010000	242000			0.606977	0.265132	0.427966	0.0906367			0.347678
	457000	385000	914000	115000			0.855805	0.613057	0.390598	0.142503			0.500491
backgroud	865000	323000	1020000	126000
	907000	244000	781000	157000
	0	0	0	0												average	SD	ttest
female	1050000	628000	1260000	409000	female	FB	0.897436	0.486822	0.63	0.280137	female	FB	0.573599		FB	0.783107	0.248934	0.144903
	788000	521000	1400000	272000			0.72963	0.423577	0.952381	0.238596			0.586046		IVF	0.487142	0.250752
	1210000	772000	1520000	495000			1.19802	0.714815	1.15152	0.475962			0.885078
	1480000	956000	1600000	669000			1.22314	0.682857	1.7316	0.71322			1.0877
	569000	300000	842000	281000		IVF	0.409353	0.205479	0.550327	0.109339		IVF	0.318624
	552000	269000	676000	147000			0.552	0.233913	0.59823	0.22039			0.401133
	691000	303000	745000	191000			0.527481	0.231298	0.490132	0.227111			0.369005
	912000	429000	1060000	339000			1.27197	0.575839	0.963636	0.627778			0.859805
backgroud	895000	317000	480000	68400
	824000	240000	662000	101000
											male+female		male	female
												FB	0.497868	0.573599		average	SD	ttest
													0.767565	0.586046	FB	0.702212	0.198457	0.0383893
													0.62653	0.885078	IVF	0.484864	0.181222
													0.593306	1.0877
												IVF	0.630118	0.318624
													0.452057	0.401133
													0.347678	0.369005
													0.500491	0.859805

## Sheet: Actin
	2022-01-13	2022-01-15	2022-01-18	2022-01-22
Actin
male	1170000	1390000	2440000	2270000
	762000	976000	1780000	891000
	1060000	1270000	1760000	1160000
	912000	1090000	1780000	1250000
	763000	816000	1860000	1050000
	1030000	1200000	1440000	1450000
	1290000	1520000	2360000	2670000
	534000	628000	2340000	807000
backgroud	91600	87900	137000	360000
	79800	102000	180000	224000
female	1170000	1290000	2000000	1460000
	1080000	1230000	1470000	1140000
	1010000	1080000	1320000	1040000
	1210000	1400000	924000	938000
	1390000	1460000	1530000	2570000
	1000000	1150000	1130000	667000
	1310000	1310000	1520000	841000
	717000	745000	1100000	540000
backgroud	126000	92200	107000	288000
	86900	112000	74600	281000

## Sheet: LdhB (4)
2022-01-22
LdhB	Image Name	Channel	Name	Signal	Total	Area	Bkgnd.	Type	Conc. Std.	Concentration	Max	Mean	StdDev
male	0001002_01	700	27	33500	198000	430	383	Signal	NaN	NaN	1590	461	101
	0001002_01	700	28	50900	230000	462	388	Signal	NaN	NaN	804	498	85.3
	0001002_01	700	29	9990	209000	516	385	Signal	NaN	NaN	884	404	86.7
	0001002_01	700	30	13200	240000	456	498	Signal	NaN	NaN	1790	527	233
	0001002_01	700	31	-1690	184000	342	543	Signal	NaN	NaN	1660	538	135
	0001002_01	700	32	48800	187000	378	365	Signal	NaN	NaN	2000	494	135
	0001002_01	700	33	41800	207000	380	435	Signal	NaN	NaN	1190	545	159
	0001002_01	700	34	9700	145000	351	385	Signal	NaN	NaN	692	413	48.7
	0001002_01	700	35	-1680	107000	333	326	Signal	NaN	NaN	371	321	15.1
	0001002_01	700	36	14	115000	320	359	Signal	NaN	NaN	403	359	12.5
female	0001002_01	700	37	95500	286000	480	397	Signal	NaN	NaN	1160	596	194
	0001002_01	700	38	145000	367000	484	457	Signal	NaN	NaN	1650	757	339
	0001002_01	700	39	121000	290000	430	394	Signal	NaN	NaN	1180	675	210
	0001002_01	700	40	60400	232000	484	355	Signal	NaN	NaN	1120	480	139
	0001002_01	700	41	74900	237000	324	499	Signal	NaN	NaN	1140	730	219
	0001002_01	700	42	42500	152000	252	436	Signal	NaN	NaN	852	604	134
	0001002_01	700	43	11300	129000	333	354	Signal	NaN	NaN	583	388	29.9
	0001002_01	700	44	8380	112000	252	411	Signal	NaN	NaN	590	444	51.4
	0001002_01	700	45	1450	101000	306	325	Signal	NaN	NaN	359	330	12.5
	0001002_01	700	46	-886	93600	270	350	Signal	NaN	NaN	394	347	12.7

## Sheet: LdhB (3)
2022-01-18
LdhB	Image Name	Channel	Name	Signal	Total	Area	Bkgnd.	Type	Conc. Std.	Concentration	Max	Mean	StdDev
male	0000997_01	700	27	49200	1010000	559	1720	Signal	NaN	NaN	2130	1810	123
	0000997_01	700	28	43600	758000	429	1670	Signal	NaN	NaN	2030	1770	115
	0000997_01	700	29	42100	922000	507	1740	Signal	NaN	NaN	2050	1820	82.4
	0000997_01	700	30	12000	863000	468	1820	Signal	NaN	NaN	2620	1840	82
	0000997_01	700	31	23400	604000	320	1820	Signal	NaN	NaN	2170	1890	88.4
	0000997_01	700	32	45500	498000	252	1800	Signal	NaN	NaN	2320	1980	106
	0000997_01	700	33	41600	585000	273	1990	Signal	NaN	NaN	2440	2140	140
	0000997_01	700	34	19200	467000	288	1560	Signal	NaN	NaN	1890	1620	94.2
	0000997_01	700	35	8910	612000	360	1680	Signal	NaN	NaN	1820	1700	63.7
	0000997_01	700	36	3240	445000	256	1730	Signal	NaN	NaN	1800	1740	22.4
female	0000997_01	700	37	17900	862000	516	1640	Signal	NaN	NaN	1920	1670	137
	0000997_01	700	38	95500	915000	507	1620	Signal	NaN	NaN	2020	1800	101
	0000997_01	700	39	99300	975000	555	1580	Signal	NaN	NaN	2080	1760	129
	0000997_01	700	40	40400	718000	468	1450	Signal	NaN	NaN	1830	1530	109
	0000997_01	700	41	78500	570000	288	1710	Signal	NaN	NaN	2320	1980	217
	0000997_01	700	42	73300	708000	369	1720	Signal	NaN	NaN	2180	1920	161
	0000997_01	700	43	40000	571000	328	1620	Signal	NaN	NaN	1980	1740	101
	0000997_01	700	44	22100	618000	390	1530	Signal	NaN	NaN	1750	1580	66.6
	0000997_01	700	45	1360	388000	264	1460	Signal	NaN	NaN	2200	1470	70.9
	0000997_01	700	46	-27200	425000	296	1530	Signal	NaN	NaN	1610	1440	92.2

## Sheet: LdhB (2)
2022-01-15
LdhB	Image Name	Channel	Name	Signal	Total	Area	Bkgnd.	Type	Conc. Std.	Concentration	Max	Mean	StdDev
male	0000994_01	700	30	47300	229000	352	515	Signal	NaN	NaN	1620	649	119
	0000994_01	700	31	69900	316000	506	487	Signal	NaN	NaN	1150	625	155
	0000994_01	700	32	55600	261000	400	514	Signal	NaN	NaN	1040	653	116
	0000994_01	700	33	18300	230000	429	493	Signal	NaN	NaN	642	536	40.2
	0000994_01	700	34	22200	170000	296	499	Signal	NaN	NaN	724	574	46.1
	0000994_01	700	35	37400	148000	216	512	Signal	NaN	NaN	963	685	97.8
	0000994_01	700	36	36100	170000	234	572	Signal	NaN	NaN	957	726	117
	0000994_01	700	37	13000	152000	273	509	Signal	NaN	NaN	674	557	48.6
	0000994_01	700	38	180	111000	238	466	Signal	NaN	NaN	579	467	14.6
	0000994_01	700	39	4590	158000	315	487	Signal	NaN	NaN	606	502	15.9
female	0000994_01	700	40	41700	240000	376	527	Signal	NaN	NaN	831	638	80.9
	0000994_01	700	41	36900	234000	405	487	Signal	NaN	NaN	1430	578	102
	0000994_01	700	42	82400	359000	588	470	Signal	NaN	NaN	1110	610	133
	0000994_01	700	43	15200	238000	492	453	Signal	NaN	NaN	600	484	35.4
	0000994_01	700	44	11900	175000	245	667	Signal	NaN	NaN	932	716	121
	0000994_01	700	45	35600	174000	256	539	Signal	NaN	NaN	894	678	113
	0000994_01	700	46	26900	191000	360	455	Signal	NaN	NaN	774	530	57.6
	0000994_01	700	47	25400	198000	387	445	Signal	NaN	NaN	686	511	46.5
	0000994_01	700	48	-32	128000	306	417	Signal	NaN	NaN	564	417	15.8
	0000994_01	700	49	786	150000	324	459	Signal	NaN	NaN	571	461	20

## Sheet: LdhB(1)
2022-01-13
LdhB	Image Name	Channel	Name	Signal	Total	Area	Bkgnd.	Type	Conc. Std.	Concentration	Max	Mean	StdDev
male	0000992_01	700	67	31200	192000	396	405	Signal	NaN	NaN	592	484	46.6
	0000992_01	700	68	32300	197000	396	415	Signal	NaN	NaN	684	497	52.5
	0000992_01	700	69	19500	176000	369	423	Signal	NaN	NaN	552	476	36.7
	0000992_01	700	70	22800	160000	328	419	Signal	NaN	NaN	556	489	40.9
	0000992_01	700	71	20000	141000	280	432	Signal	NaN	NaN	596	504	50.9
	0000992_01	700	72	10600	125000	280	408	Signal	NaN	NaN	522	446	31.5
	0000992_01	700	73	17000	138000	294	413	Signal	NaN	NaN	545	471	36.1
	0000992_01	700	74	13400	124000	280	396	Signal	NaN	NaN	636	444	40.2
	0000992_01	700	75	-425	107000	280	384	Signal	NaN	NaN	398	382	6.24
	0000992_01	700	76	-349	127000	315	405	Signal	NaN	NaN	436	404	10.7
female	0000992_01	700	77	38600	207000	376	447	Signal	NaN	NaN	648	550	49.4
	0000992_01	700	78	23200	204000	462	392	Signal	NaN	NaN	516	442	35.1
	0000992_01	700	79	59200	267000	516	402	Signal	NaN	NaN	640	517	68.9
	0000992_01	700	80	90700	350000	658	394	Signal	NaN	NaN	770	532	103
	0000992_01	700	81	14400	117000	259	396	Signal	NaN	NaN	506	452	26.4
	0000992_01	700	82	16200	122000	273	386	Signal	NaN	NaN	497	445	27.3
	0000992_01	700	83	20000	162000	360	394	Signal	NaN	NaN	533	450	34.9
	0000992_01	700	84	28000	159000	308	424	Signal	NaN	NaN	611	515	56
	0000992_01	700	85	1950	128000	342	369	Signal	NaN	NaN	405	375	13.1
	0000992_01	700	86	153	128000	340	377	Signal	NaN	NaN	522	377	20.9

## Sheet: MCT1-700 (4)
2022-01-22
MCT1 male	Image Name	Channel	Name	Signal	Total	Area	Bkgnd.	Type	Conc. Std.	Concentration	Max	Mean	StdDev
	0001001_01	700	7	132000	392000	704	369	Signal	NaN	NaN	762	556	102
	0001001_01	700	8	98800	353000	731	348	Signal	NaN	NaN	1030	483	90.4
	0001001_01	700	9	40800	263000	688	323	Signal	NaN	NaN	482	382	40.8
	0001001_01	700	10	28300	203000	507	344	Signal	NaN	NaN	451	400	25.7
	0001001_01	700	11	58000	218000	378	422	Signal	NaN	NaN	753	575	83.3
	0001001_01	700	12	24800	188000	451	361	Signal	NaN	NaN	566	416	45.9
	0001001_01	700	13	63600	242000	420	424	Signal	NaN	NaN	932	575	114
	0001001_01	700	14	5740	115000	315	348	Signal	NaN	NaN	424	366	25.3
	0001001_01	700	15	-2600	126000	410	313	Signal	NaN	NaN	333	307	14.1
	0001002_01	700	17	-18100	157000	495	354	Signal	NaN	NaN	443	317	21.4
MCT1 female	0001001_01	700	16	142000	409000	688	388	Signal	NaN	NaN	949	594	129
	0001001_01	700	17	32900	272000	731	327	Signal	NaN	NaN	506	372	38.7
	0001001_01	700	18	209000	495000	656	436	Signal	NaN	NaN	1300	755	235
	0001001_01	700	19	315000	669000	748	473	Signal	NaN	NaN	2090	894	340
	0001001_01	700	20	50000	281000	615	375	Signal	NaN	NaN	573	456	70.6
	0001001_01	700	21	12600	147000	378	356	Signal	NaN	NaN	478	389	38.5
	0001001_01	700	22	8090	191000	507	361	Signal	NaN	NaN	440	377	20.7
	0001001_01	700	23	128000	339000	462	457	Signal	NaN	NaN	1420	735	217
	0001001_01	700	24	848	68400	203	333	Signal	NaN	NaN	356	337	6.9
	0001001_01	700	25	-3830	101000	324	325	Signal	NaN	NaN	356	313	14.1

## Sheet: MCT1-700 (3)
2022-01-18
MCT1 male	Image Name	Channel	Name	Signal	Total	Area	Bkgnd.	Type	Conc. Std.	Concentration	Max	Mean	StdDev
	0000997_01	700	7	166000	1330000	675	1720	Signal	NaN	NaN	2310	1960	153
	0000997_01	700	8	136000	1240000	630	1750	Signal	NaN	NaN	2240	1960	137
	0000997_01	700	9	66900	1380000	720	1820	Signal	NaN	NaN	4750	1910	174
	0000997_01	700	10	66400	1420000	756	1790	Signal	NaN	NaN	2150	1870	103
	0000997_01	700	11	118000	1050000	520	1800	Signal	NaN	NaN	2610	2030	182
	0000997_01	700	12	97600	1100000	560	1790	Signal	NaN	NaN	2590	1960	244
	0000997_01	700	13	111000	1010000	504	1790	Signal	NaN	NaN	2360	2010	178
	0000997_01	700	14	10500	914000	546	1650	Signal	NaN	NaN	1750	1670	31.5
	0000997_01	700	15	1400	1020000	616	1650	Signal	NaN	NaN	1800	1650	45.6
	0000997_01	700	16	-3400	781000	480	1630	Signal	NaN	NaN	1720	1630	37.8
MCT1 female	0000997_01	700	17	131000	1260000	688	1640	Signal	NaN	NaN	2480	1840	207
	0000997_01	700	18	118000	1400000	779	1650	Signal	NaN	NaN	2600	1800	239
	0000997_01	700	19	286000	1520000	714	1720	Signal	NaN	NaN	3090	2120	334
	0000997_01	700	20	355000	1600000	688	1810	Signal	NaN	NaN	3190	2330	383
	0000997_01	700	21	50900	842000	480	1650	Signal	NaN	NaN	2000	1750	119
	0000997_01	700	22	13600	676000	407	1630	Signal	NaN	NaN	1910	1660	74.1
	0000997_01	700	23	1050	745000	456	1630	Signal	NaN	NaN	1860	1630	53.6
	0000997_01	700	24	218000	1060000	520	1620	Signal	NaN	NaN	3240	2040	319
	0000997_01	700	25	435	480000	330	1450	Signal	NaN	NaN	1540	1450	29.5
	0000997_01	700	26	991	662000	416	1590	Signal	NaN	NaN	1750	1590	111

## Sheet: MCT1-700 (2)
2022-01-15
MCT1 male	Image Name	Channel	Name	Signal	Total	Area	Bkgnd.	Type	Conc. Std.	Concentration	Max	Mean	StdDev
	0000978_01	700	7	255000	921000	990	672	Signal	NaN	NaN	1180	930	142
	0000978_01	700	8	192000	726000	774	690	Signal	NaN	NaN	1440	937	157
	0000978_01	700	9	98100	653000	840	661	Signal	NaN	NaN	955	778	69.5
	0000978_01	700	10	15000	412000	612	648	Signal	NaN	NaN	804	672	34
	0000978_01	700	11	78200	416000	462	731	Signal	NaN	NaN	1220	900	109
	0000978_01	700	12	34800	345000	456	680	Signal	NaN	NaN	856	756	44.3
	0000978_01	700	13	67100	403000	440	764	Signal	NaN	NaN	1150	916	106
	0000978_01	700	14	29300	385000	516	690	Signal	NaN	NaN	1060	747	68.2
	0000978_01	700	15	1820	323000	504	638	Signal	NaN	NaN	850	642	30.9
	0000978_01	700	16	-3550	244000	407	608	Signal	NaN	NaN	665	599	28.8
MCT1 female	0000978_01	700	17	133000	628000	817	606	Signal	NaN	NaN	1060	769	116
	0000978_01	700	18	63300	521000	688	665	Signal	NaN	NaN	959	757	66.5
	0000978_01	700	19	249000	772000	774	676	Signal	NaN	NaN	1560	998	250
	0000978_01	700	20	360000	956000	860	692	Signal	NaN	NaN	2680	1110	338
	0000978_01	700	21	30000	300000	480	563	Signal	NaN	NaN	695	626	38.7
	0000978_01	700	22	6240	269000	492	535	Signal	NaN	NaN	594	548	20.7
	0000978_01	700	23	72600	303000	400	577	Signal	NaN	NaN	940	758	102
	0000978_01	700	24	133000	429000	410	722	Signal	NaN	NaN	1440	1050	174
	0000978_01	700	25	-5460	317000	504	640	Signal	NaN	NaN	776	629	35
	0000978_01	700	26	492	240000	378	634	Signal	NaN	NaN	707	635	34.2

[truncated: 5 more sheets: MCT1-700(1), actin-800 (4), actin-800 (3), actin-800 (2), actin-800(1)]
