# Supplementary material for: Murine blastocysts generated by in vitro fertilization show increased Warburg metabolism and altered lactate production
Source: eLife journal article supplement (doi:10.7554/elife.79153), 2022-09-15
Supplement: supp [file Figure 7. Liver source data.xlsx]

## Sheet: LdhB
	2022-02-07	2022-02-10	2022-02-14	2022-02-16			2022-02-07	2022-02-10	2022-02-14	2022-02-16
LdhB						with actin						4 blots			male	average	SD	ttest
male	2800000	378000	1710000	1280000	male	FB	2.66667	5.6	7.91667	0.373178	male	FB	4.13913		FB	5.86706	1.55808	0.0988263
	4050000	352000	1850000	2200000			5.45087	5.39877	8.64486	0.88			5.09363		IVF	4.04722	0.358409
	5470000	492000	2530000	3170000			9.48007	6.96884	13.1088	1.04967			7.65185
	3480000	339000	1870000	2850000			6.55367	5.53922	12.9861	1.25551			6.58363
	2750000	232000	871000	1880000		IVF	6.94444	4.34457	5.96575	0.969072		IVF	4.55596
	2630000	240000	1260000	1120000			3.81159	4.67836	7.15909	0.511416			4.04012
	2560000	291000	1230000	1460000			2.93915	5.34926	6.24365	0.579365			3.77786
	1920000	226000	1330000	1560000			2.92683	3.66883	7.77778	0.886364			3.81495
backgroud	194000	109000	296000	350000
	180000	116000	281000	260000
															female	average	SD	ttest
female	3920000	361000	2310000	2080000	female	FB	4.02051	5.98673	10.3125	0.793893	female	FB	5.27841		FB	4.99571	0.416135	0.00531908
	3390000	268000	1790000	2320000			3.82187	5.33865	7.45833	0.895753			4.37865		IVF	3.70036	0.441947
	3700000	291000	2110000	2220000			4.95979	5.31993	8.97872	1.24022			5.12466
	2710000	309000	1950000	1670000			3.33744	5.90822	10.5405	1.01829			5.20112
	4010000	191000	1630000	1180000		IVF	4.01	2.91159	8.9071	0.605128		IVF	4.10845
	2310000	176000	1260000	1320000			2.83436	2.82051	8.4	0.745763			3.70016
	2470000	187000	725000	797000			3.70871	2.94953	5.10563	0.581752			3.08641
	1980000	173000	1580000	1180000			2.50316	2.71586	9.57576	0.830986			3.90644
backgroud	296000	111000	332000	272000
	282000	83000	234000	256000
											male+female		male	female
												FB	4.13913	5.27841		average	SD	ttest
													5.09363	4.37865	FB	5.43138	1.15393	0.00605357
													7.65185	5.12466	IVF	3.87379	0.416094
													6.58363	5.20112
												IVF	4.55596	4.10845
													4.04012	3.70016
													3.77786	3.08641
													3.81495	3.90644

## Sheet: Mct1
	2022-02-07	2022-02-10	2022-02-14	2022-02-16			2022-02-07	2022-02-10	2022-02-14	2022-02-16
Mct1						with actin						4 blots				average	SD	ttest
male	2350000	2150000	2150000	2580000	male	FB	2.2381	31.8519	9.9537	0.752187	male	FB	11.199		FB	7.86034	2.42515	0.0787741
	1740000	1250000	1890000	1790000			2.34186	19.1718	8.83178	0.716			7.76535		IVF	4.77642	1.15868
	1120000	1210000	1630000	1700000			1.94107	17.1388	8.4456	0.562914			7.0221
	678000	777000	1070000	945000			1.27684	12.6961	7.43056	0.4163			5.45494
	830000	671000	1360000	1350000		IVF	2.09596	12.5655	9.31507	0.695876		IVF	6.16811
	561000	570000	606000	784000			0.813043	11.1111	3.44318	0.357991			3.93133
	805000	760000	1140000	1170000			0.924225	13.9706	5.7868	0.464286			5.28648
	632000	608000	630000	636000			0.963415	9.87013	3.68421	0.361364			3.71978
backgroud	137000	171000	400000	318000
	135000	154000	329000	284000
	0	0	0	0												average	SD	ttest
female	1520000	1070000	1750000	2140000	female	FB	1.55897	17.7446	7.8125	0.816794	female	FB	6.98322		FB	9.25695	4.52918	0.167803
	813000	614000	1170000	1370000			0.916573	12.2311	4.875	0.528958			4.6379		IVF	5.08851	2.22411
	2130000	1320000	2910000	3480000			2.85523	24.1316	12.383	1.94413			10.3285
	2730000	1850000	3570000	3740000			3.36207	35.3728	19.2973	2.28049			15.0782
	989000	705000	901000	1050000		IVF	0.989	10.747	4.9235	0.538462		IVF	4.29948
	588000	449000	864000	770000			0.721472	7.19551	5.76	0.435028			3.528
	718000	583000	813000	765000			1.07808	9.19558	5.72535	0.558394			4.13935
	1460000	1340000	1480000	2410000			1.84576	21.0361	8.9697	1.69718			8.38719
backgroud	227000	162000	365000	447000
	273000	148000	369000	419000
											male+female		male	female
												FB	11.199	6.98322		average	SD	ttest
													7.76535	4.6379	FB	8.55864	3.44519	0.0228036
													7.0221	10.3285	IVF	4.93246	1.65021
													5.45494	15.0782
												IVF	6.16811	4.29948
													3.93133	3.528
													5.28648	4.13935
													3.71978	8.38719

## Sheet: Actin
	2022-02-07	2022-02-10	2022-02-14	2022-02-16
Actin
male	1050000	67500	216000	3430000
	743000	65200	214000	2500000
	577000	70600	193000	3020000
	531000	61200	144000	2270000
	396000	53400	146000	1940000
	690000	51300	176000	2190000
	871000	54400	197000	2520000
	656000	61600	171000	1760000
backgroud	107000	39500	148000	174000
	81200	42500	213000	228000
female	975000	60300	224000	2620000
	887000	50200	240000	2590000
	746000	54700	235000	1790000
	812000	52300	185000	1640000
	1000000	65600	183000	1950000
	815000	62400	150000	1770000
	666000	63400	142000	1370000
	791000	63700	165000	1420000
backgroud	77900	28700	87700	148000
	52000	45400	144000	228000

## Sheet: LdhB (4)
2022-02-16
LdhB	Image Name	Channel	Name	Signal	Total	Area	Bkgnd.	Type	Conc. Std.	Concentration	Max	Mean	StdDev
male	0001015_01	700	7	720000	1280000	272	2050	Signal	NaN	NaN	8630	4700	1620
	0001015_01	700	8	1600000	2200000	350	1710	Signal	NaN	NaN	11500	6280	2620
	0001015_01	700	9	2240000	3170000	407	2260	Signal	NaN	NaN	14400	7780	3340
	0001015_01	700	10	2000000	2850000	432	1970	Signal	NaN	NaN	11900	6590	2470
	0001015_01	700	11	1180000	1880000	231	3020	Signal	NaN	NaN	12100	8130	2280
	0001015_01	700	12	596000	1120000	192	2720	Signal	NaN	NaN	8230	5820	995
	0001015_01	700	13	916000	1460000	192	2850	Signal	NaN	NaN	10500	7620	1540
	0001015_01	700	14	1030000	1560000	204	2610	Signal	NaN	NaN	12500	7660	2460
	0001015_01	700	15	-15800	350000	210	1740	Signal	NaN	NaN	2070	1670	89.4
	0001015_01	700	16	-4490	260000	203	1300	Signal	NaN	NaN	1370	1280	22.6
female	0001015_01	700	17	1330000	2080000	280	2690	Signal	NaN	NaN	13800	7430	3160
	0001015_01	700	18	1530000	2320000	340	2320	Signal	NaN	NaN	12100	6830	2690
	0001015_01	700	19	1390000	2220000	306	2700	Signal	NaN	NaN	12800	7250	2640
	0001015_01	700	20	957000	1670000	288	2480	Signal	NaN	NaN	9540	5800	1930
	0001015_01	700	21	680000	1180000	160	3150	Signal	NaN	NaN	10100	7400	1610
	0001015_01	700	22	755000	1320000	198	2830	Signal	NaN	NaN	8930	6640	1510
	0001015_01	700	23	408000	797000	155	2510	Signal	NaN	NaN	7380	5140	1010
	0001015_01	700	24	713000	1180000	160	2900	Signal	NaN	NaN	10600	7360	1720
	0001015_01	700	25	-1840	272000	156	1760	Signal	NaN	NaN	1900	1740	46.6
	0001015_01	700	26	1290	256000	145	1760	Signal	NaN	NaN	1950	1760	69.3

## Sheet: LdhB (3)
2022-02-14
LdhB	Image Name	Channel	Name	Signal	Total	Area	Bkgnd.	Type	Conc. Std.	Concentration	Max	Mean	StdDev
male	0001013_01	700	7	981000	1710000	481	1520	Signal	NaN	NaN	6600	3550	1340
	0001013_01	700	8	1240000	1850000	370	1620	Signal	NaN	NaN	9260	4990	2120
	0001013_01	700	9	1740000	2530000	494	1590	Signal	NaN	NaN	9440	5110	2320
	0001013_01	700	10	1220000	1870000	429	1530	Signal	NaN	NaN	7470	4370	1870
	0001013_01	700	11	503000	871000	216	1710	Signal	NaN	NaN	5910	4030	1000
	0001013_01	700	12	826000	1260000	216	1990	Signal	NaN	NaN	8250	5810	1650
	0001013_01	700	13	800000	1230000	222	1920	Signal	NaN	NaN	8030	5520	1690
	0001013_01	700	14	900000	1330000	231	1840	Signal	NaN	NaN	8140	5740	1620
	0001013_01	700	15	-290	296000	297	999	Signal	NaN	NaN	1100	998	55.2
	0001013_01	700	16	-13400	281000	256	1150	Signal	NaN	NaN	1360	1100	48.8
female	0001013_01	700	17	1640000	2310000	481	1390	Signal	NaN	NaN	9690	4790	2480
	0001013_01	700	18	1260000	1790000	432	1220	Signal	NaN	NaN	8200	4140	2040
	0001013_01	700	19	1420000	2110000	456	1520	Signal	NaN	NaN	8080	4640	1810
	0001013_01	700	20	1270000	1950000	507	1330	Signal	NaN	NaN	6610	3840	1540
	0001013_01	700	21	801000	1630000	272	3060	Signal	NaN	NaN	8530	6010	1140
	0001013_01	700	22	666000	1260000	252	2370	Signal	NaN	NaN	7080	5010	1080
	0001013_01	700	23	386000	725000	210	1620	Signal	NaN	NaN	5690	3450	977
	0001013_01	700	24	935000	1580000	315	2030	Signal	NaN	NaN	7810	5000	1390
	0001013_01	700	25	-4070	332000	374	898	Signal	NaN	NaN	1040	887	47.5
	0001013_01	700	26	-7780	234000	228	1060	Signal	NaN	NaN	1130	1030	42

## Sheet: LdhB (2)
2022-02-10
LdhB	Image Name	Channel	Name	Signal	Total	Area	Bkgnd.	Type	Conc. Std.	Concentration	Max	Mean	StdDev
male	0001011_01	700	67	56400	378000	370	869	Signal	NaN	NaN	1740	1020	203
	0001011_01	700	68	90500	352000	380	689	Signal	NaN	NaN	1430	927	251
	0001011_01	700	69	176000	492000	360	877	Signal	NaN	NaN	2160	1370	430
	0001011_01	700	70	110000	339000	370	619	Signal	NaN	NaN	1460	916	236
	0001011_01	700	71	86000	232000	210	694	Signal	NaN	NaN	1550	1100	224
	0001011_01	700	72	105000	240000	198	678	Signal	NaN	NaN	1660	1210	240
	0001011_01	700	73	124000	291000	238	700	Signal	NaN	NaN	1800	1220	285
	0001011_01	700	74	94300	226000	210	625	Signal	NaN	NaN	1990	1070	367
	0001011_01	700	75	-1260	109000	208	529	Signal	NaN	NaN	722	523	53.1
	0001011_01	700	76	-8290	116000	203	611	Signal	NaN	NaN	732	570	86.5
female	0001011_01	700	77	116000	361000	380	646	Signal	NaN	NaN	1400	951	260
	0001011_01	700	78	85800	268000	390	467	Signal	NaN	NaN	1130	687	199
	0001011_01	700	79	108000	291000	312	584	Signal	NaN	NaN	1460	931	262
	0001011_01	700	80	88100	309000	370	596	Signal	NaN	NaN	1240	834	212
	0001011_01	700	81	67000	191000	210	592	Signal	NaN	NaN	1280	911	171
	0001011_01	700	82	46800	176000	252	512	Signal	NaN	NaN	968	698	127
	0001011_01	700	83	42900	187000	280	516	Signal	NaN	NaN	890	669	111
	0001011_01	700	84	37300	173000	210	648	Signal	NaN	NaN	1120	826	149
	0001011_01	700	85	-11300	111000	231	529	Signal	NaN	NaN	598	480	64.1
	0001011_01	700	86	843	83000	222	370	Signal	NaN	NaN	428	374	26

## Sheet: LdhB(1)
2022-02-07
LdhB	Image Name	Channel	Name	Signal	Total	Area	Bkgnd.	Type	Conc. Std.	Concentration	Max	Mean	StdDev
male	0001008_01	700	27	2100000	2800000	396	1780	Signal	NaN	NaN	11700	7070	2730
	0001008_01	700	28	3390000	4050000	468	1420	Signal	NaN	NaN	18100	8660	4840
	0001008_01	700	29	4600000	5470000	468	1860	Signal	NaN	NaN	21500	11700	5410
	0001008_01	700	30	2890000	3480000	504	1170	Signal	NaN	NaN	13700	6900	3380
	0001008_01	700	31	2030000	2750000	324	2240	Signal	NaN	NaN	13400	8490	2910
	0001008_01	700	32	1780000	2630000	252	3370	Signal	NaN	NaN	17300	10400	3390
	0001008_01	700	33	1490000	2560000	252	4260	Signal	NaN	NaN	14800	10200	2810
	0001008_01	700	34	1300000	1920000	204	3020	Signal	NaN	NaN	16900	9410	3840
	0001008_01	700	35	-1370	194000	280	697	Signal	NaN	NaN	888	692	85.9
	0001008_01	700	36	5680	180000	245	713	Signal	NaN	NaN	1080	736	93
female	0001008_01	700	37	3360000	3920000	444	1260	Signal	NaN	NaN	21400	8830	6570
	0001008_01	700	38	2900000	3390000	385	1290	Signal	NaN	NaN	16700	8820	4570
	0001008_01	700	39	3160000	3700000	462	1160	Signal	NaN	NaN	20200	8000	6160
	0001008_01	700	40	2320000	2710000	340	1150	Signal	NaN	NaN	19900	7970	5500
	0001008_01	700	41	3240000	4010000	304	2520	Signal	NaN	NaN	25300	13200	6500
	0001008_01	700	42	1590000	2310000	216	3340	Signal	NaN	NaN	18400	10700	3740
	0001008_01	700	43	1930000	2470000	245	2210	Signal	NaN	NaN	19300	10100	4710
	0001008_01	700	44	1430000	1980000	198	2790	Signal	NaN	NaN	16900	10000	4140
	0001008_01	700	45	28600	296000	279	957	Signal	NaN	NaN	2930	1060	390
	0001008_01	700	46	20900	282000	315	829	Signal	NaN	NaN	1340	895	209

## Sheet: MCT1-700 (4)
2022-02-16
MCT1 male	Image Name	Channel	Name	Signal	Total	Area	Bkgnd.	Type	Conc. Std.	Concentration	Max	Mean	StdDev
	0001017_01	700	7	1310000	2580000	702	1820	Signal	NaN	NaN	7410	3680	1400
	0001017_01	700	8	829000	1790000	684	1400	Signal	NaN	NaN	4630	2610	876
	0001017_01	700	9	733000	1700000	702	1380	Signal	NaN	NaN	3910	2430	782
	0001017_01	700	10	285000	945000	576	1140	Signal	NaN	NaN	2760	1640	475
	0001017_01	700	11	604000	1350000	396	1890	Signal	NaN	NaN	5460	3410	928
	0001017_01	700	12	266000	784000	324	1600	Signal	NaN	NaN	3440	2420	547
	0001017_01	700	13	439000	1170000	342	2150	Signal	NaN	NaN	5280	3430	797
	0001017_01	700	14	150000	636000	288	1690	Signal	NaN	NaN	3310	2210	456
	0001017_01	700	15	649	318000	288	1100	Signal	NaN	NaN	1310	1100	55
	0001017_01	700	16	-62	284000	288	986	Signal	NaN	NaN	1100	986	31.9
MCT1 female	0001017_01	700	17	897000	2140000	624	2000	Signal	NaN	NaN	5670	3430	1040
	0001017_01	700	18	441000	1370000	555	1680	Signal	NaN	NaN	3940	2480	570
	0001017_01	700	19	2050000	3480000	684	2100	Signal	NaN	NaN	8630	5090	1980
	0001017_01	700	20	2120000	3740000	720	2240	Signal	NaN	NaN	10200	5190	2270
	0001017_01	700	21	341000	1050000	396	1790	Signal	NaN	NaN	3650	2650	543
	0001017_01	700	22	188000	770000	324	1790	Signal	NaN	NaN	3390	2380	453
	0001017_01	700	23	289000	765000	288	1650	Signal	NaN	NaN	3850	2660	529
	0001017_01	700	24	1180000	2410000	444	2770	Signal	NaN	NaN	8140	5420	1630
	0001017_01	700	25	-9760	447000	350	1300	Signal	NaN	NaN	1500	1280	48.2
	0001017_01	700	26	-27200	419000	310	1440	Signal	NaN	NaN	1540	1350	44

## Sheet: MCT1-700 (3)
2022-02-14
MCT1 male	Image Name	Channel	Name	Signal	Total	Area	Bkgnd.	Type	Conc. Std.	Concentration	Max	Mean	StdDev
	0001014_01	700	7	900000	2150000	666	1870	Signal	NaN	NaN	5860	3220	977
	0001014_01	700	8	798000	1890000	777	1410	Signal	NaN	NaN	4100	2430	656
	0001014_01	700	9	518000	1630000	722	1550	Signal	NaN	NaN	3420	2260	449
	0001014_01	700	10	252000	1070000	592	1380	Signal	NaN	NaN	2400	1810	219
	0001014_01	700	11	503000	1360000	456	1870	Signal	NaN	NaN	4540	2970	754
	0001014_01	700	12	126000	606000	288	1660	Signal	NaN	NaN	2780	2100	248
	0001014_01	700	13	391000	1140000	380	1970	Signal	NaN	NaN	4390	3000	655
	0001014_01	700	14	86500	630000	306	1780	Signal	NaN	NaN	2580	2060	261
	0001014_01	700	15	-9770	400000	320	1280	Signal	NaN	NaN	1380	1250	53.3
	0001014_01	700	16	-16900	329000	256	1350	Signal	NaN	NaN	1450	1290	50.2
MCT1 female	0001014_01	700	17	753000	1750000	646	1540	Signal	NaN	NaN	4870	2710	977
	0001014_01	700	18	396000	1170000	629	1230	Signal	NaN	NaN	2890	1860	462
	0001014_01	700	19	1740000	2910000	760	1540	Signal	NaN	NaN	6680	3830	1590
	0001014_01	700	20	2060000	3570000	720	2100	Signal	NaN	NaN	9750	4960	2130
	0001014_01	700	21	231000	901000	380	1760	Signal	NaN	NaN	3570	2370	458
	0001014_01	700	22	223000	864000	407	1580	Signal	NaN	NaN	3150	2120	426
	0001014_01	700	23	303000	813000	360	1420	Signal	NaN	NaN	3830	2260	602
	0001014_01	700	24	614000	1480000	390	2220	Signal	NaN	NaN	6320	3790	1050
	0001014_01	700	25	-22700	365000	320	1210	Signal	NaN	NaN	1320	1140	69.5
	0001014_01	700	26	315	369000	310	1190	Signal	NaN	NaN	1350	1190	74.8

## Sheet: MCT1-700 (2)
2022-02-10
MCT1 male	Image Name	Channel	Name	Signal	Total	Area	Bkgnd.	Type	Conc. Std.	Concentration	Max	Mean	StdDev
	0001011_01	700	27	1290000	2150000	760	1130	Signal	NaN	NaN	5480	2830	1110
	0001011_01	700	28	687000	1250000	703	804	Signal	NaN	NaN	3290	1780	701
	0001011_01	700	29	465000	1210000	702	1060	Signal	NaN	NaN	2860	1720	445
	0001011_01	700	30	324000	777000	666	680	Signal	NaN	NaN	2040	1170	354
	0001011_01	700	31	316000	671000	360	986	Signal	NaN	NaN	2710	1860	541
	0001011_01	700	32	235000	570000	360	931	Signal	NaN	NaN	2850	1580	509
	0001011_01	700	33	341000	760000	360	1160	Signal	NaN	NaN	3310	2110	634
	0001011_01	700	34	247000	608000	396	912	Signal	NaN	NaN	2740	1530	430
	0001011_01	700	35	13900	171000	408	386	Signal	NaN	NaN	932	420	93.8
	0001011_01	700	36	-17200	154000	288	595	Signal	NaN	NaN	606	535	28.5
MCT1 female	0001011_01	700	37	525000	1070000	608	904	Signal	NaN	NaN	3820	1770	664
	0001011_01	700	38	225000	614000	608	640	Signal	NaN	NaN	1660	1010	331
	0001011_01	700	39	805000	1320000	666	772	Signal	NaN	NaN	3710	1980	843
	0001011_01	700	40	1200000	1850000	740	879	Signal	NaN	NaN	5040	2500	1170
	0001011_01	700	41	302000	705000	504	800	Signal	NaN	NaN	2140	1400	366
	0001011_01	700	42	144000	449000	407	748	Signal	NaN	NaN	1640	1100	252
	0001011_01	700	43	267000	583000	432	731	Signal	NaN	NaN	2320	1350	435
	0001011_01	700	44	701000	1340000	507	1260	Signal	NaN	NaN	4660	2640	948
	0001011_01	700	45	-25900	162000	320	588	Signal	NaN	NaN	682	506	48.6
	0001011_01	700	46	-25000	148000	310	559	Signal	NaN	NaN	665	478	54.9

[truncated: 5 more sheets: MCT1-700(1), actin-800 (4), actin-800 (3), actin-800 (2), actin-800(1)]
