# Supplementary material for: Murine blastocysts generated by in vitro fertilization show increased Warburg metabolism and altered lactate production
Source: eLife journal article supplement (doi:10.7554/elife.79153), 2022-09-15
Supplement: supp [file Figure 7. muscle source data.xlsx]

## Sheet: LdhB
	2021-12-03	2021-12-08	2021-12-09	2021-12-16				2021-12-03	2021-12-08	2021-12-09	2021-12-16
LdhB						with actin	animal#						4 blots			male	average	SD	ttest
male	8860000	707000	1200000	3110000	male	FB	5	7.38333	0.79349	0.491803	0.891117	male	FB	2.38994		FB	2.6933	0.276708	0.00580896
	11000000	473000	1260000	2640000			23	9.16667	0.463725	0.707865	0.783383			2.78041		IVF	1.55848	0.420549
	8600000	1080000	797000	4210000			11	8.8843	1.27811	0.452841	1.51439			3.03241
	6970000	600000	1050000	3620000			22	7.61749	0.91047	0.589888	1.16399			2.57046
	6210000	368000	318000	1630000		IVF	27	5.54464	0.325664	0.170968	0.59058		IVF	1.65796
	4900000	381000	606000	1810000			28	6.83403	0.307258	0.420833	0.655797			2.05448
	5220000	620000	713000	3080000			30	4.53913	0.278027	0.302119	0.806283			1.48139
	3190000	673000	58400	2740000			102	3.12745	0.36776	0.0249573	0.640187			1.04009
backgroud	258000	89400	105000	74000
	240000	95300	0	93500
																female	average	SD	ttest
female	2490000	1420000	2000000	6690000	female	FB	15	3.55714	0.739583	1	1.2366	female	FB	1.63333		FB	1.66676	0.431844	0.0322601
	2170000	1510000	3390000	8920000			3	3.45541	1.02721	2.30612	2.17561			2.24109		IVF	0.97737	0.258974
	1600000	1200000	1700000	6080000			10	2.61866	0.727273	1.28788	1.76232			1.59903
	1070000	1360000	968000	4580000			8	1.39323	0.860759	1.04762	1.47267			1.19357
	1610000	705000	679000	4020000		IVF	29	1.59406	0.400568	0.443791	1.21818		IVF	0.91415
	2040000	696000	1180000	3560000			105	2.68068	0.437736	1.04425	1.22337			1.34651
	1710000	941000	167000	2530000			108	1.67647	0.468159	0.109868	0.706704			0.740301
	2900000	211000	109000	3440000			110	2.21374	0.155147	0.0990909	1.1661			0.90852
backgroud	235000	130000	91900	150000
	272000	117000	166000	248000
												male+female		male	female
													FB	2.38994	1.63333		average	SD	ttest
														2.78041	2.24109	FB	2.18003	0.643292	0.00614152
														3.03241	1.59903	IVF	1.26793	0.448357
														2.57046	1.19357
													IVF	1.65796	0.91415
														2.05448	1.34651
														1.48139	0.740301
														1.04009	0.90852

## Sheet: Mct1
	2021-12-03	2021-12-08	2021-12-09	2021-12-16				2021-12-03	2021-12-08	2021-12-09	2021-12-16
Mct1						with actin	animal#						4 blots				average	SD	ttest
male	991000	496000	742000	1080000	male	FB	5	0.825833	0.556678	0.304098	0.309456	male	FB	0.499016		FB	0.436019	0.0667091	0.00434123
	1020000	505000	550000	892000			23	0.85	0.495098	0.308989	0.264688			0.479694		IVF	0.243645	0.0450477
	819000	313000	362000	634000			11	0.846074	0.370414	0.205682	0.228058			0.412557
	581000	255000	345000	608000			22	0.634973	0.38695	0.19382	0.195498			0.35281
	594000	285000	301000	415000		IVF	27	0.530357	0.252212	0.161828	0.150362		IVF	0.27369
	520000	161000	229000	365000			28	0.725244	0.129839	0.159028	0.132246			0.286589
	624000	255000	302000	448000			30	0.542609	0.11435	0.127966	0.117277			0.225551
	519000	162000	218000	276000			102	0.508824	0.0885246	0.0931624	0.064486			0.188749
backgroud	429000	122000	150000	282000
	384000	126000	249000	179000
																	average	SD	ttest
female	813000	607000	393000	669000	female	FB	15	1.16143	0.316146	0.1965	0.12366	female	FB	0.449434		FB	0.679002	0.248008	0.0542457
	783000	543000	275000	488000			3	1.24682	0.369388	0.187075	0.119024			0.480576		IVF	0.301744	0.0359075
	1450000	853000	491000	783000			10	2.37316	0.51697	0.37197	0.226957			0.872264
	1700000	987000	533000	746000			8	2.21354	0.624684	0.57684	0.239871			0.913734
	693000	329000	231000	395000		IVF	29	0.686139	0.186932	0.15098	0.119697		IVF	0.285937
	532000	218000	172000	240000			105	0.69908	0.137107	0.152212	0.0824742			0.267718
	774000	367000	290000	271000			108	0.758824	0.182587	0.190789	0.0756983			0.301975
	747000	642000	273000	339000			110	0.570229	0.472059	0.248182	0.114915			0.351346
backgroud	410000	193000	178000	240000
	428000	193000	176000	171000
												male+female		male	female
													FB	0.499016	0.449434		average	SD	ttest
														0.479694	0.480576	FB	0.557511	0.212453	0.00644939
														0.412557	0.872264	IVF	0.272694	0.048854
														0.35281	0.913734
													IVF	0.27369	0.285937
														0.286589	0.267718
														0.225551	0.301975
														0.188749	0.351346

## Sheet: Actin
	2021-12-03	2021-12-08	2021-12-09	2021-12-16
Actin
male	1200000	891000	2440000	3490000
	1200000	1020000	1780000	3370000
	968000	845000	1760000	2780000
	915000	659000	1780000	3110000
	1120000	1130000	1860000	2760000
	717000	1240000	1440000	2760000
	1150000	2230000	2360000	3820000
	1020000	1830000	2340000	4280000
backgroud	106000	164000	137000	181000
	102000	101000	180000	171000
female	700000	1920000	2000000	5410000
	628000	1470000	1470000	4100000
	611000	1650000	1320000	3450000
	768000	1580000	924000	3110000
	1010000	1760000	1530000	3300000
	761000	1590000	1130000	2910000
	1020000	2010000	1520000	3580000
	1310000	1360000	1100000	2950000
backgroud	109000	141000	107000	149000
	119000	150000	74600	181000

## Sheet: LdhB (4)
2021-12-16
LdhB	Image Name	Channel	Name	Signal	Total	Area	Bkgnd.	Type	Conc. Std.	Concentration	Max	Mean	StdDev
male	0000984_01	700	72	2720000	3110000	400	989	Signal	NaN	NaN	18100	7780	4650
	0000984_01	700	73	1790000	2640000	287	2940	Signal	NaN	NaN	31800	9190	7320
	0000984_01	700	74	3630000	4210000	420	1360	Signal	NaN	NaN	30100	10000	8200
	0000984_01	700	75	3060000	3620000	369	1520	Signal	NaN	NaN	22100	9820	5440
	0000984_01	700	76	1140000	1630000	246	1980	Signal	NaN	NaN	20700	6620	4840
	0000984_01	700	77	1200000	1810000	246	2490	Signal	NaN	NaN	19800	7370	5620
	0000984_01	700	80	2150000	3080000	205	4530	Signal	NaN	NaN	27300	15000	5140
	0000984_01	700	81	1890000	2740000	205	4160	Signal	NaN	NaN	30800	13400	9410
	0000984_01	700	82	-1180	74000	148	508	Signal	NaN	NaN	533	500	14.6
	0000984_01	700	83	-1910	93500	192	497	Signal	NaN	NaN	554	487	20.9
female	0000984_01	700	84	6010000	6690000	440	1550	Signal	NaN	NaN	34100	15200	10500
	0000984_01	700	85	7340000	8920000	387	4080	Signal	NaN	NaN	39700	23100	9260
	0000984_01	700	86	5250000	6080000	352	2370	Signal	NaN	NaN	36000	17300	10800
	0000984_01	700	87	3450000	4580000	294	3870	Signal	NaN	NaN	34000	15600	7610
	0000984_01	700	88	2350000	4020000	200	8320	Signal	NaN	NaN	35400	20100	8170
	0000984_01	700	89	2290000	3560000	195	6520	Signal	NaN	NaN	28800	18300	7430
	0000984_01	700	90	1180000	2530000	117	11500	Signal	NaN	NaN	33500	21600	7300
	0000984_01	700	91	2830000	3440000	222	2760	Signal	NaN	NaN	30800	15500	8450
	0000984_01	700	92	18500	150000	259	507	Signal	NaN	NaN	1030	579	110
	0000984_01	700	93	59300	248000	280	674	Signal	NaN	NaN	1270	886	138

## Sheet: LdhB (3)
LdhB	Image Name	Channel	Name	Signal	Total	Area	Bkgnd.	Type	Conc. Std.	Concentration	Max	Mean	StdDev
male	0000980_01	700	15	1390000	1950000	440	1280	Signal	NaN	NaN	14800	4440	3440
	0000980_01	700	16	549000	1200000	369	1770	Signal	NaN	NaN	13700	3260	2540
	0000980_01	700	17	664000	1260000	369	1620	Signal	NaN	NaN	11300	3420	2440
	0000980_01	700	18	-933000	797000	344	5030	Signal	NaN	NaN	8560	2320	1500
	0000980_01	700	19	397000	1050000	222	2940	Signal	NaN	NaN	13900	4730	3210
	0000980_01	700	20	42000	318000	205	1340	Signal	NaN	NaN	3370	1550	593
	0000980_01	700	21	210000	606000	185	2140	Signal	NaN	NaN	7020	3280	1280
	0000980_01	700	22	365000	713000	160	2180	Signal	NaN	NaN	11600	4460	2170
	0000980_01	700	23	-2640	58400	112	545	Signal	NaN	NaN	539	521	7.56
	0000980_01	700	24	-20600	105000	165	760	Signal	NaN	NaN	755	635	48.7
female	0000980_01	700	25	1830000	2590000	360	2100	Signal	NaN	NaN	14500	7200	3750
	0000980_01	700	26	1350000	2000000	336	1940	Signal	NaN	NaN	15200	5970	3500
	0000980_01	700	27	2150000	3390000	400	3100	Signal	NaN	NaN	20000	8470	4830
	0000980_01	700	28	862000	1700000	280	3000	Signal	NaN	NaN	15700	6080	3700
	0000980_01	700	29	583000	968000	216	1780	Signal	NaN	NaN	8860	4480	2020
	0000980_01	700	30	412000	679000	180	1480	Signal	NaN	NaN	8360	3770	1700
	0000980_01	700	31	533000	1180000	216	3000	Signal	NaN	NaN	10200	5470	2360
	0000980_01	700	32	-24700	167000	216	890	Signal	NaN	NaN	1480	775	202
	0000980_01	700	33	9750	109000	192	518	Signal	NaN	NaN	1200	569	117
	0000980_01	700	34	823	91900	165	552	Signal	NaN	NaN	779	557	96.6
	0000980_01	700	86	-43300	166000	330	633	Signal	NaN	NaN	755	502	65.7

## Sheet: LdhB (2)
2021-12-08
LdhB	Image Name	Channel	Name	Signal	Total	Area	Bkgnd.	Type	Conc. Std.	Concentration	Max	Mean	StdDev
male	0000981_01	700	88	427000	707000	387	723	Signal	NaN	NaN	4100	1830	873
	0000981_01	700	89	149000	473000	378	856	Signal	NaN	NaN	4150	1250	744
	0000981_01	700	90	676000	1080000	420	959	Signal	NaN	NaN	9340	2570	2010
	0000981_01	700	91	251000	600000	420	832	Signal	NaN	NaN	3440	1430	700
	0000981_01	700	92	128000	368000	240	1000	Signal	NaN	NaN	5160	1530	890
	0000981_01	700	93	33300	381000	240	1450	Signal	NaN	NaN	4820	1590	703
	0000981_01	700	94	256000	620000	301	1210	Signal	NaN	NaN	8940	2060	1470
	0000981_01	700	95	407000	673000	246	1080	Signal	NaN	NaN	8400	2740	1720
	0000981_01	700	96	1300	89400	198	445	Signal	NaN	NaN	569	452	13.5
	0000981_01	700	97	-7920	95300	186	555	Signal	NaN	NaN	674	512	45.3
female	0000981_01	700	98	980000	1420000	396	1120	Signal	NaN	NaN	9840	3590	2720
	0000981_01	700	99	987000	1510000	440	1200	Signal	NaN	NaN	9370	3440	2610
	0000981_01	700	100	785000	1200000	369	1110	Signal	NaN	NaN	9090	3240	2190
	0000981_01	700	101	988000	1360000	420	875	Signal	NaN	NaN	9740	3230	2300
	0000981_01	700	102	-116000	705000	186	4420	Signal	NaN	NaN	7130	3790	1290
	0000981_01	700	103	116000	696000	203	2860	Signal	NaN	NaN	8500	3430	1700
	0000981_01	700	104	471000	941000	222	2120	Signal	NaN	NaN	8600	4240	1820
	0000981_01	700	105	49900	211000	252	638	Signal	NaN	NaN	2460	836	378
	0000981_01	700	106	5500	130000	231	539	Signal	NaN	NaN	783	563	52.4
	0000981_01	700	107	14200	117000	170	606	Signal	NaN	NaN	930	689	115

## Sheet: LdhB(1)
2021-12-03
LdhB	Image Name	Channel	Name	Signal	Total	Area	Bkgnd.	Type	Conc. Std.	Concentration	Max	Mean	StdDev
male	0000973_01	700	7	7620000	8860000	684	1810	Signal	NaN	NaN	33900	13000	9230
	0000973_01	700	8	9320000	11000000	702	2460	Signal	NaN	NaN	35600	15700	9430
	0000973_01	700	9	7170000	8600000	663	2160	Signal	NaN	NaN	33200	13000	7580
	0000973_01	700	10	5270000	6970000	540	3150	Signal	NaN	NaN	24000	12900	6070
	0000973_01	700	11	5030000	6210000	429	2750	Signal	NaN	NaN	30100	14500	6090
	0000973_01	700	12	3680000	4900000	432	2840	Signal	NaN	NaN	21700	11400	5260
	0000973_01	700	13	3950000	5220000	420	3020	Signal	NaN	NaN	22000	12400	5670
	0000973_01	700	14	2640000	3190000	315	1750	Signal	NaN	NaN	24600	10100	6470
	0000973_01	700	15	-496	258000	264	981	Signal	NaN	NaN	1230	979	53.9
	0000973_01	700	16	-31800	240000	297	916	Signal	NaN	NaN	1080	809	72.4
female	0000973_01	700	17	2010000	2490000	555	869	Signal	NaN	NaN	9810	4480	2490
	0000973_01	700	18	1780000	2170000	407	952	Signal	NaN	NaN	12800	5340	3540
	0000973_01	700	19	1170000	1600000	444	961	Signal	NaN	NaN	8610	3600	1800
	0000973_01	700	20	720000	1070000	481	722	Signal	NaN	NaN	4240	2220	976
	0000973_01	700	21	1200000	1610000	456	881	Signal	NaN	NaN	9540	3520	2180
	0000973_01	700	22	1630000	2040000	451	920	Signal	NaN	NaN	14900	4530	3560
	0000973_01	700	23	1270000	1710000	440	1000	Signal	NaN	NaN	8800	3890	2020
	0000973_01	700	24	2280000	2900000	480	1300	Signal	NaN	NaN	19400	6040	3950
	0000973_01	700	25	14900	235000	279	790	Signal	NaN	NaN	1220	843	77.4
	0000973_01	700	26	-1340	272000	429	638	Signal	NaN	NaN	961	635	66.6

## Sheet: MCT1-700 (4)
2021-12-16
MCT1 male	Image Name	Channel	Name	Signal	Total	Area	Bkgnd.	Type	Conc. Std.	Concentration	Max	Mean	StdDev
	0000980_01	700	47	474000	1080000	945	640	Signal	NaN	NaN	1660	1140	270
	0000980_01	700	48	344000	892000	946	579	Signal	NaN	NaN	1690	943	243
	0000980_01	700	49	151000	634000	882	548	Signal	NaN	NaN	919	719	89.6
	0000980_01	700	50	62200	608000	1035	527	Signal	NaN	NaN	892	587	52.3
	0000980_01	700	51	100000	415000	480	655	Signal	NaN	NaN	1270	864	155
	0000980_01	700	52	44400	365000	533	602	Signal	NaN	NaN	842	685	67.6
	0000980_01	700	53	103000	448000	516	668	Signal	NaN	NaN	1280	868	156
	0000980_01	700	54	1960	276000	410	669	Signal	NaN	NaN	951	674	41.2
	0000980_01	700	55	1300	282000	550	510	Signal	NaN	NaN	629	512	26.8
	0000980_01	700	56	-6280	179000	342	543	Signal	NaN	NaN	585	525	12.1
MCT1 female	0000980_01	700	57	212000	669000	874	523	Signal	NaN	NaN	1100	765	154
	0000980_01	700	58	115000	488000	792	471	Signal	NaN	NaN	888	617	82.4
	0000980_01	700	59	294000	783000	924	529	Signal	NaN	NaN	1820	847	311
	0000980_01	700	60	306000	746000	779	565	Signal	NaN	NaN	1820	958	310
	0000980_01	700	61	94600	395000	520	577	Signal	NaN	NaN	951	759	109
	0000980_01	700	62	22200	240000	440	495	Signal	NaN	NaN	1340	546	86.7
	0000980_01	700	63	67000	271000	369	552	Signal	NaN	NaN	980	733	125
	0000980_01	700	64	90700	339000	420	592	Signal	NaN	NaN	1270	808	167
	0000980_01	700	65	1520	240000	528	451	Signal	NaN	NaN	758	454	36.2
	0000980_01	700	66	2060	171000	350	482	Signal	NaN	NaN	772	488	58.3

## Sheet: MCT1-700 (3)
2021-12-09
MCT1 male	Image Name	Channel	Name	Signal	Total	Area	Bkgnd.	Type	Conc. Std.	Concentration	Max	Mean	StdDev
	0000980_01	700	35	209000	742000	602	886	Signal	NaN	NaN	1660	1230	224
	0000980_01	700	36	130000	550000	516	815	Signal	NaN	NaN	1690	1070	208
	0000980_01	700	37	40500	362000	468	686	Signal	NaN	NaN	919	772	68.3
	0000980_01	700	38	8250	345000	588	573	Signal	NaN	NaN	808	587	35.8
	0000980_01	700	39	75900	301000	320	705	Signal	NaN	NaN	1270	942	125
	0000980_01	700	40	25800	229000	320	636	Signal	NaN	NaN	842	717	58.2
	0000980_01	700	41	72200	302000	320	719	Signal	NaN	NaN	1280	944	131
	0000980_01	700	42	5730	218000	328	648	Signal	NaN	NaN	762	665	39.3
	0000980_01	700	43	-2410	150000	296	514	Signal	NaN	NaN	545	506	8.16
	0000980_01	700	44	-8410	249000	473	545	Signal	NaN	NaN	585	527	17.1
MCT1 female	0000980_01	700	45	97300	393000	473	625	Signal	NaN	NaN	1100	831	131
	0000980_01	700	46	27700	275000	440	562	Signal	NaN	NaN	764	625	62.5
	0000980_01	700	47	171000	491000	462	692	Signal	NaN	NaN	1820	1060	291
	0000980_01	700	48	219000	533000	520	604	Signal	NaN	NaN	1820	1030	340
	0000980_01	700	49	41400	231000	320	594	Signal	NaN	NaN	898	723	102
	0000980_01	700	50	21300	172000	304	495	Signal	NaN	NaN	1340	565	95.6
	0000980_01	700	51	75800	290000	400	535	Signal	NaN	NaN	980	725	126
	0000980_01	700	52	84900	273000	336	561	Signal	NaN	NaN	1270	814	183
	0000980_01	700	53	1070	178000	390	453	Signal	NaN	NaN	524	456	17.1
	0000980_01	700	54	-16000	176000	380	506	Signal	NaN	NaN	531	464	19.8

## Sheet: MCT1-700 (2)
2021-12-10	Image Name	Channel	Name	Signal	Total	Area	Bkgnd.	Type	Conc. Std.	Concentration	Max	Mean	StdDev
MCT1 male	0000981_01	1901-11-30	7	116000	496000	616	617	Signal	NaN	NaN	1150	805	134
	0000981_01	1901-11-30	8	151000	505000	630	562	Signal	NaN	NaN	1750	802	250
	0000981_01	1901-11-30	9	36400	313000	462	598	Signal	NaN	NaN	1120	677	108
	0000981_01	1901-11-30	10	5520	255000	507	493	Signal	NaN	NaN	608	504	21.3
	0000981_01	1901-11-30	11	84100	285000	360	558	Signal	NaN	NaN	1340	791	187
	0000981_01	1901-11-30	12	16800	161000	287	503	Signal	NaN	NaN	816	561	39
	0000981_01	1901-11-30	13	46100	255000	396	527	Signal	NaN	NaN	942	643	100
	0000981_01	1901-11-30	14	7710	162000	294	526	Signal	NaN	NaN	709	552	67.9
	0000981_01	1901-11-30	15	-1210	122000	259	477	Signal	NaN	NaN	535	472	18.8
	0000981_01	1901-11-30	16	-2230	126000	273	470	Signal	NaN	NaN	529	462	17.1
MCT1 female	0000981_01	1901-11-30	17	167000	607000	675	653	Signal	NaN	NaN	1300	900	167
	0000981_01	1901-11-30	18	74400	543000	630	744	Signal	NaN	NaN	1120	862	101
	0000981_01	1901-11-30	19	349000	853000	714	705	Signal	NaN	NaN	1980	1190	350
	0000981_01	1901-11-30	20	480000	987000	765	662	Signal	NaN	NaN	2320	1290	468
	0000981_01	1901-11-30	21	61500	329000	468	571	Signal	NaN	NaN	789	703	59.2
	0000981_01	1901-11-30	22	9680	218000	370	562	Signal	NaN	NaN	732	588	31.3
	0000981_01	1901-11-30	23	92700	367000	420	653	Signal	NaN	NaN	1170	874	159
	0000981_01	1901-11-30	24	216000	642000	585	728	Signal	NaN	NaN	4510	1100	386
	0000981_01	1901-11-30	25	-3820	193000	350	562	Signal	NaN	NaN	653	551	26.5
	0000981_01	1901-11-30	26	-5580	193000	385	516	Signal	NaN	NaN	562	502	15.8
2nd 12/8/21	Image Name	Channel	Name	Signal	Total	Area	Bkgnd.	Type	Conc. Std.	Concentration	Max	Mean	StdDev
	0000981_01	700	68	221000	654000	836	518	Signal	NaN	NaN	1150	782	135
	0000981_01	700	69	209000	677000	945	495	Signal	NaN	NaN	1750	716	250
	0000981_01	700	70	106000	535000	855	502	Signal	NaN	NaN	1120	626	117
	0000981_01	700	71	24800	401000	798	472	Signal	NaN	NaN	608	503	22.5
	0000981_01	700	72	99000	400000	560	537	Signal	NaN	NaN	1340	714	186
	0000981_01	700	73	21800	291000	546	493	Signal	NaN	NaN	816	533	43.6
	0000981_01	700	74	53300	305000	484	520	Signal	NaN	NaN	942	630	97
	0000981_01	700	75	9540	304000	564	522	Signal	NaN	NaN	709	539	57.2
	0000981_01	700	76	-2040	201000	456	446	Signal	NaN	NaN	485	442	12.5
	0000981_01	700	77	-4960	186000	410	466	Signal	NaN	NaN	529	454	17.9
	0000981_01	700	78	240000	728000	840	581	Signal	NaN	NaN	1300	867	181
	0000981_01	700	79	198000	716000	860	603	Signal	NaN	NaN	1200	833	133
	0000981_01	700	80	486000	1100000	1056	585	Signal	NaN	NaN	1980	1050	365
	0000981_01	700	81	588000	1170000	968	604	Signal	NaN	NaN	2320	1210	448
	0000981_01	700	82	77900	410000	600	553	Signal	NaN	NaN	789	683	68.4
	0000981_01	700	83	21900	387000	680	537	Signal	NaN	NaN	732	569	35.9
	0000981_01	700	84	102000	447000	540	638	Signal	NaN	NaN	1170	828	170
	0000981_01	700	85	239000	739000	720	695	Signal	NaN	NaN	4510	1030	380
	0000981_01	700	86	1380	294000	585	501	Signal	NaN	NaN	646	503	15.3
	0000981_01	700	87	-8820	231000	440	545	Signal	NaN	NaN	611	525	19.1

[truncated: 5 more sheets: MCT1-700(1), actin-800 (4), actin-800 (3), actin-800 (2), actin-800(1)]
